# Supplementary material for: Real-world persistence and adherence to oral antimuscarinics and mirabegron in patients with overactive bladder (OAB): a systematic literature review
Source: PubMed Central journal article supplement — BMJ Open. 2018 Nov 21;8(11):e021889. doi: 10.1136/bmjopen-2018-021889 (PMC6252764; doi:10.1136/bmjopen-2018-021889), 2018-11-21
Supplement: bmjopen-2018-021889.draft_revisions.pdf [file bmjopen-2018-021889.draft_revisions.pdf]

# BMJ Open

BMJ Open is committed to open peer review. As part of this commitment we make the peer review history of every article we publish publicly available.

When an article is published we post the peer reviewers' comments and the authors' responses online. We also post the versions of the paper that were used during peer review. These are the versions that the peer review comments apply to.

The versions of the paper that follow are the versions that were submitted during the peer review process. They are not the versions of record or the final published versions. They should not be cited or distributed as the published version of this manuscript.

BMJ Open is an open access journal and the full, final, typeset and author-corrected version of record of the manuscript is available on our site with no access controls, subscription charges or pay-per-view fees (<http://bmjopen.bmj.com>).

If you have any questions on BMJ Open's open peer review process please email [info.bmjopen@bmj.com](mailto:info.bmjopen@bmj.com)

# BMJ Open

## Adherence and persistence to oral medication in patients with overactive bladder (OAB) in a real-world setting – a systematic literature review

|                               |                                                                                                                                                                                                                                                                                                                                                 |
|-------------------------------|-------------------------------------------------------------------------------------------------------------------------------------------------------------------------------------------------------------------------------------------------------------------------------------------------------------------------------------------------|
| Journal:                      | <i>BMJ Open</i>                                                                                                                                                                                                                                                                                                                                 |
| Manuscript ID                 | bmjopen-2018-021889                                                                                                                                                                                                                                                                                                                             |
| Article Type:                 | Research                                                                                                                                                                                                                                                                                                                                        |
| Date Submitted by the Author: | 25-Jan-2018                                                                                                                                                                                                                                                                                                                                     |
| Complete List of Authors:     | Yeowell, Gillian; Manchester Metropolitan University, Health Professions Department (Physiotherapy)<br>Smith, Philip; Manchester Metropolitan University<br>Nazir, Jameel; Astellas Pharma Europe Ltd<br>Hakimi, Zalmi; Astellas Pharma BV<br>Siddiqui, Emad; Astellas Pharma Europe Ltd<br>Fatoye, Francis; Manchester Metropolitan University |
| Keywords:                     | Overactive bladder, persistence, adherence, antimuscarinics, $\beta$ 3 adrenergic receptor agonists, systematic literature review                                                                                                                                                                                                               |
|                               |                                                                                                                                                                                                                                                                                                                                                 |

SCHOLARONE™  
Manuscripts

Peer Review Only

1  
2  
3 **Adherence and persistence to oral medication in patients with**  
4 **overactive bladder (OAB) in a real-world setting – a systematic**  
5 **literature review**  
6  
7  
8  
9

10  
11  
12  
13 **Gillian Yeowell<sup>1</sup>, Philip Smith<sup>1</sup>, Jameel Nazir<sup>2</sup>, Zalmai Hakimi<sup>3</sup>, Emad Siddiqui<sup>2</sup>, Francis**  
14 **Fatoye<sup>1</sup>**  
15  
16

17  
18  
19  
20  
21 <sup>1</sup>*Manchester Metropolitan University, Manchester, UK*  
22

23 <sup>2</sup>*Astellas Pharma Europe Ltd., Chertsey, UK*  
24

25  
26 <sup>3</sup>*Astellas Pharma Europe B.V., Leiden, the Netherlands*  
27  
28  
29  
30

31 **Correspondence:**

32 Gillian Yeowell  
33 Health Professions Department (Physiotherapy)  
34 Birley Building  
35 Birley Fields Campus  
36 53 Bonsall Street  
37 Manchester M15 6GX  
38 Email: [G.Yeowell@mmu.ac.uk](mailto:G.Yeowell@mmu.ac.uk)  
39 Tel: 0161 247 2967  
40  
41  
42  
43  
44  
45  
46  
47

48 **Running head:** Adherence and persistence to OAB medication  
49  
50  
51

52 **Key Words:** Overactive bladder, persistence, adherence, antimuscarinics,  $\beta_3$ -adrenergic  
53 receptor agonists, systematic literature review  
54  
55  
56  
57

## ABSTRACT

**Purpose** To evaluate persistence and adherence of oral pharmacotherapy used in the treatment of overactive bladder (OAB) in a real-world setting.

**Materials and Methods** Systematic literature searches of six electronic publication databases were performed to identify database studies of OAB patients treated with antimuscarinics and/or mirabegron. Studies reporting persistence and adherence data solely from patient interviews or subjective questionnaires were excluded. Reference lists of identified studies and relevant systematic reviews were assessed to identify additional relevant studies.

**Results** The search identified 3897 studies, of which 30 were selected for extraction. Overall, persistence ranged from 5–47%. In studies reporting data for antimuscarinics and mirabegron (n=3), persistence at 1 year was 12–25% and 32–38%, respectively. Median time to discontinuation was <5 months for antimuscarinics (except one study [6.5 months]) and 5.6–7.4 months for mirabegron. The proportion of patients adherent at 1 year varied between 15–44%. In studies reporting adherence for antimuscarinics and mirabegron, adherence was higher with mirabegron (mean medication possession ratio (MPR): 0.59 vs 0.41–0.53; mean proportion of days covered: 0.66 vs 0.55; and median MPR: 0.65 vs 0.19–0.49). Reported determinants of persistence and adherence included female gender, older age group, using an extended-release formulation and treatment experience.

**Conclusion** Most patients with OAB discontinued oral OAB pharmacotherapy and were non-adherent 1 year after treatment initiation. However, mirabegron was associated with greater persistence and adherence compared to antimuscarinics, supporting mirabegron as a first-line pharmacological treatment option for patients with OAB.

## STRENGTHS AND LIMITATIONS

- This systematic literature review includes data for mirabegron, which was approved in 2013 and not covered in previous systematic reviews examining persistence and adherence to overactive bladder medication.
- Only observational database studies were included in this study, providing a more accurate picture of rates of adherence and persistence to overactive bladder medication, which are generally lower in routine clinical practice compared to randomized clinical trials.
- This systematic literature review provides a global picture of adherence and persistence to OAB medication based on the inclusion of data from Canada, Czech Republic, Denmark, Germany, Norway, Spain, the United Kingdom and the United States.
- Although determinants of persistence and adherence were evaluated in this study, other factors such as influence persistence with treatment in patients with overactive bladder including patient expectations, appropriate counselling and patient satisfaction with treatment could not be assessed.
- The definitions and calculations of persistence and adherence were not uniform across the literature and the terms were often used interchangeably, limiting the ability to compare across studies.

## INTRODUCTION

Overactive bladder (OAB) is defined as a condition with characteristic symptoms of urinary urgency, usually accompanied by frequency and nocturia, with or without urgency incontinence, in the absence of urinary tract infection (UTI) or other obvious pathology.<sup>1</sup> OAB affects 11.8–24.7% of adults in North America and Europe, and the prevalence increases with age.<sup>2</sup> In addition to age, risk factors for developing OAB include diabetes, UTIs and obesity.<sup>3 4</sup>

OAB symptoms are associated with a negative impact on health-related quality of life (HRQoL) and a significant economic burden. Indeed, bothersome OAB symptoms may lead to depression and anxiety, and sleep disturbances, which can adversely affect a patient's daily, social and professional functioning.<sup>5 6</sup> Whilst the cost of pharmaceutical treatment represents only a small fraction of the total therapy cost, the provision of containment products (eg, pads), treatment for clinical depression, nursing home stays and loss of productivity due to work absenteeism are the main cost drivers in OAB.<sup>7 8</sup> For example, the total annual cost of OAB was estimated to be \$24.9 billion in the United States in 2007<sup>9</sup> and €9.7 billion across five European countries (Germany, Italy, Spain, Sweden and the United Kingdom) and Canada in 2005.<sup>8</sup>

Behavioural and lifestyle modifications are routinely the initial treatment strategy for OAB, and pharmacotherapy is recommended only if conservative management is not effective.<sup>10</sup> As OAB is a chronic condition, it is important that patients continue with treatment to control symptoms.<sup>11</sup> Lack of adherence and persistence to medication are considered the leading causes of preventable morbidity in patients with chronic conditions<sup>12 13</sup> and are also associated with greater indirect costs.<sup>13</sup> Although antimuscarinics are the current mainstay of oral pharmacotherapy, they are often associated with bothersome anticholinergic side effects, such as dry mouth and constipation; tolerability is one of the most common reasons for treatment discontinuation.<sup>11 14-17</sup> In a systematic review of antimuscarinic treatment in

1  
2  
3 patients with OAB, rates of discontinuation at 12 weeks ranged from 4–31% in clinical trials  
4  
5 and 43–83% in medical claims databases.<sup>16</sup>  
6  
7

8 The other class of oral pharmacotherapy approved for the treatment of OAB is  
9  
10  $\beta_3$ -adrenergic receptor agonists. Mirabegron is currently the only commercially available  
11  
12 agent of this class licensed in countries across Europe, North America and Asia.<sup>18-20</sup> Due to  
13  
14 a distinct mechanism of action, the incidence of typical anticholinergic side effects with  
15  
16 mirabegron is generally similar to placebo,<sup>21</sup> which may translate into better treatment  
17  
18 persistence.<sup>22 23</sup> In addition, results of a recent economic analysis found that increased  
19  
20 persistence with mirabegron treatment vs antimuscarinics was associated with reduced  
21  
22 healthcare resource use and work hours lost, resulting in lower total costs.<sup>24</sup>  
23

24 In general, rates of persistence and adherence with antimuscarinics and mirabegron are  
25  
26 typically lower in routine clinical practice compared to interventional clinical trials.<sup>11 25</sup> To help  
27  
28 identify factors affecting long-term persistence and adherence to OAB pharmacotherapy, a  
29  
30 contemporary, comprehensive review of real-world evidence is needed. As mirabegron was  
31  
32 a relatively new OAB treatment, it was not included in previous systematic reviews.  
33  
34 Therefore, the current analysis aims to systematically review prospective and retrospective  
35  
36 observational database studies conducted with antimuscarinics and/or mirabegron to  
37  
38 determine the rates and determinants of persistence and adherence.  
39  
40

## 41 **METHODS**

42  
43  
44 This systematic literature review (SLR) was conducted in accordance with guidelines for the  
45  
46 Preferred Reporting Items for Systematic Reviews and Meta-Analyses (PRISMA).<sup>26</sup> The  
47  
48 protocol for the review was registered *a priori* with the International Prospective Register of  
49  
50 Systematic Reviews (registered January 18, 2017 with PROSPERO CRD42017059894).  
51

52  
53 Searches were performed April 27, 2017 *via* the following electronic databases: Allied  
54  
55 and Complementary Medicine Database (AMED); Cumulative Index to Nursing and Allied  
56  
57

1  
2  
3 Health Literature (CINAHL); MEDLINE; Database of Abstracts of Reviews of Effects (DARE);  
4 Health Technology Assessment (HTA) database; and the Centre for Reviews and  
5 Dissemination (CRD) database. The search terms were persisten\* OR adheren\* OR  
6 complian\* OR discont\* OR tolera\* OR utili\* OR database [Title], AND "bladder" OR  
7 "overactive bladder" OR "OAB" OR urin\* OR incontinen\* [Title], OR oxybutynin OR  
8 tolterodine OR fesoterodine OR trospium OR darifenacin OR solifenacin OR propiverine OR  
9 imidafenacin OR mirabegron OR flavoxate OR hyoscyamin\* OR anticholinerg\* OR  
10 antimuscarin\* [Title].  
11  
12  
13  
14  
15  
16  
17  
18

19 All search results were exported into EndNote Web (Thomas Reuter, CA, USA)  
20 bibliography software and duplicates removed electronically and manually. The full electronic  
21 search strategy is outlined in the Supplemental information.  
22  
23  
24  
25

### 26 **Inclusion and exclusion criteria**

27  
28 Inclusion criteria were: prospective and retrospective observational database studies  
29 investigating persistence and adherence to oral medication for the treatment of OAB in  
30 adults, which were published on any date, in a peer-reviewed source. Exclusion criteria  
31 were: abstract unavailable; studies not yet fully completed; randomised controlled trials  
32 (RCTs); systematic reviews; narrative literature reviews; conference papers; single case  
33 studies/reports; studies investigating OAB medication among only healthy, asymptomatic  
34 participants; studies from which oral-only OAB persistence/adherence results cannot be  
35 isolated from other results (ie, transdermal patches); and studies containing patients aged  
36 <18 years (where the data pertaining to these patients could not be removed from the  
37 results). Populations with lower urinary tract symptoms due to stress incontinence and  
38 benign prostatic hyperplasia were also excluded.  
39  
40  
41  
42  
43  
44  
45  
46  
47  
48  
49  
50

### 51 **Study selection**

52 Duplicates were removed and title and abstract screening was performed by two  
53 independent researchers (PS and GY). Full-text articles were obtained and studies were  
54  
55  
56  
57



1  
2  
3 excluded if they did not meet the inclusion criteria.<sup>26</sup> Any disagreement in study selection  
4 was resolved through discussion and consultation with another member of the project team  
5 (FF) where necessary. During screening, open-label extension studies of RCTs were  
6 excluded as the trial designs were unlikely to reflect a real-world setting. Studies using data  
7 from hospital records, in addition to large-scale databases, were included provided that  
8 persistence and adherence data were directly recorded rather than extracted from  
9 supplemental patient interviews or subjective questionnaires. The literature search was  
10 supplemented by screening for potential additional relevant studies identified from the  
11 reference lists of eligible articles.  
12  
13  
14  
15  
16  
17  
18  
19  
20

### 21 **Data extraction**

22 Parameters that may affect persistence or adherence were collected, including patient  
23 characteristics (age and sex); interventions (initial [index] OAB drug and formulation) and  
24 comorbidities. The definitions, outcomes and determinants of treatment persistence and  
25 adherence were also collected, where reported. The extracted data were evaluated by one  
26 researcher and verified by a second researcher.  
27  
28  
29  
30  
31  
32  
33

## 34 **RESULTS**

### 35 **Brief overview of studies**

36 Overall, 3897 articles were identified from the literature search; 3,614 were screened for  
37 title/abstract and 75 assessed for eligibility (figure 1). A total of 30 articles were included in  
38 the SLR (supplementary table 1), including three identified from reference lists.<sup>27-29</sup>  
39  
40  
41  
42  
43  
44  
45

46 The data were collected from patients treated in Europe (12 studies) and North America  
47 (18 studies) (supplementary table 1) and were included in the analysis. The number of  
48 participants included in the published studies ranged from 377 to 103 250. Where stated, the  
49 mean age of the participants ranged from 44 to 80 years and the duration of follow-up  
50 ranged from 6 months to 7 years. Interventions included bethanechol, darifenacin,  
51  
52  
53  
54  
55  
56  
57  
58  
59  
60

1  
2  
3 fesoterodine, flavoxate, hyoscyamine, imipramine, mirabegron, oxybutynin, propiverine,  
4 solifenacin, tolterodine and trospium chloride. Definitions of adherence and persistence  
5 differed across the studies (supplementary table 1). In general, medication possession rate  
6 (MPR) or proportion of days covered (PDC) by prescription were typically used as a  
7 surrogate for adherence to drug. Persistence was typically defined as the proportion of  
8 patients continuing therapy/refilling prescriptions for the follow-up period (without  
9 discontinuing the index drug or switching to other OAB drug[s]) and/or the median time to  
10 discontinuation (TTD).  
11  
12  
13  
14  
15  
16  
17  
18

### 19 **Persistence**

20 Overall, persistence rates decreased over time, regardless of agent (supplementary table 2).  
21  
22  
23

### 24 **Antimuscarinic studies**

25 Data for persistence (or discontinuation) at approximately 6 months was available in 14  
26 articles<sup>28-41</sup> which reported data on antimuscarinics only. Yeaw 2009 was an exception due  
27 to the inclusion of bethanechol (a muscarinic receptor agonist), which accounted for <1.5%  
28 of the pharmacy claims for OAB medications.<sup>29</sup> The proportion of patients persistent at  
29 6 months was <50% except for the studies of Sicras-Mainar *et al*,<sup>36-38</sup> where persistence  
30 ranged from 57–71%. In addition, two studies reported discontinuation rates of 6–43% after  
31 1 month of initial treatment.<sup>35 41</sup>  
32  
33  
34  
35  
36  
37  
38  
39  
40

41 At 1 year, persistence rates for antimuscarinics, in 19 studies, ranged from around 5%  
42 up to 47%.<sup>15 23 30 32 34 36 37 39 40 42-49</sup> Median TTD was <5 months (30 to 128 days) for all  
43 medications across all studies,<sup>15 23 28 32 42 49 50</sup> with the exception of Krhut *et al*<sup>34</sup> (6.5 months).  
44 At 2 years, over 75% of patients discontinued treatment.<sup>30 32 44 50 51</sup> Rates of treatment  
45 switching were infrequently reported, and where provided, were ≤17% of patients.<sup>28 31 33 42 47</sup>  
46  
47  
48  
49  
50

51 50 51  
52  
53  
54  
55  
56  
57  
58  
59  
60

### ***Antimuscarinic and mirabegron studies***

In all four studies, a greater proportion of patients persisted with mirabegron compared with antimuscarinics. In one study, persistence rates for tolterodine and mirabegron at 6 months were 19% and 35%, respectively.<sup>27</sup> Persistence at 1 year ranged from 12–25% for antimuscarinics and from 32–38% for mirabegron, as reported in three studies<sup>15 23 49</sup> and was significantly greater with mirabegron vs antimuscarinics in two studies.<sup>15 23</sup> Overall, mirabegron, solifenacin and fesoterodine were associated with the highest rates of persistence.<sup>15 23</sup>

Median TTD (or median persistence) in the overall study populations was longer with mirabegron (5.6–7.4 months) compared with the assessed antimuscarinics (1.0–3.6 months).<sup>15 23 27 49</sup>

### **Adherence**

Adherence rates to all OAB medications reduced over time in all studies and varied across studies (supplementary table 2).

### ***Antimuscarinic studies***

At 1 year, the proportion of adherent patients varied between 1%<sup>41</sup> and 36%,<sup>42</sup> across those studies that provided these data. Few studies reported adherence beyond 1 year. However, Sears *et al* reported that 34% of patients were adherent at the end of 3 years,<sup>52</sup> which was comparable to the adherence rates reported by some other studies at just 1 year.<sup>42 47</sup>

### ***Antimuscarinic and mirabegron studies***

In the three studies, adherence at 1 year was significantly higher in patients receiving mirabegron compared with antimuscarinics (mean MPR: 0.59 vs 0.41 to 0.53; mean PDC: 0.66 vs 0.55; and median MPR: 0.65 vs 0.19 to 0.49).<sup>15 23 49</sup> The proportion of patients adherent at 1 year was also greater with mirabegron compared with antimuscarinics (mean MPR  $\geq 0.80$ : 43% vs 22–35%; mean PDC  $\geq 0.80$ : 44% vs 31%).<sup>15 23</sup>

## Determinants of persistence and adherence

Determinants of persistence and adherence were reported in 24 of the 30 studies. As expected, most studies reported medication type as a determinant of persistence/adherence (figure 2; supplementary table 2). In general, persistence and adherence were higher in: older patients compared with younger patients,<sup>23 27 28 30-33 40 42-45 47 50 53</sup> female patients compared with their male counterparts,<sup>28 30 33 43-45 53</sup> except in one study;<sup>52</sup> patients receiving extended-release (ER) formulations compared with immediate-release formulations,<sup>42 50</sup> and treated patients compared to treatment naïve patients (or untreated in the pre-index period [6 months or 1 year]).<sup>15 23 30</sup> Comorbidities, including diabetes, Parkinson's disease, epilepsy, dementia, multiple sclerosis and hypertension, were correlated with increased treatment persistence and adherence;<sup>43 44 53</sup> exceptions were chronic obstructive pulmonary disease and migraine.<sup>44 53</sup>

Other reported determinants of favorable persistence and adherence included higher treatment doses;<sup>30</sup> low daily quantity of tablets,<sup>31</sup> absence of UTI; higher baseline OAB costs;<sup>33</sup> treatment by urologists vs gynecologists/general practitioners; the absence of side effects (headache, stomach upset and glaucoma);<sup>44</sup> White vs Black, Hispanic and Asian patients and patients of other ethnicities;<sup>41 45</sup> lower medication co-payment;<sup>45</sup> and use of fewer medications.<sup>41</sup>

## DISCUSSION

This systematic review provides an overview of persistence and adherence with oral pharmacotherapies used to treat patients with OAB in real-life clinical practice. A wealth of data were collected from 30 observational studies performed in Europe and North America totaling over 500 000 patients. A number of key findings were identified, including greater persistence and adherence with mirabegron vs antimuscarinics,<sup>15 23 27 49</sup> in females vs males,<sup>28 33 43 45 53</sup> in older vs younger patients,<sup>23 27 28 30-33 40 42-45 47 50 53</sup> and in previously treated vs untreated patients.<sup>15 23 30</sup>

1  
2  
3 Across the studies, persistence appeared to reduce very quickly after initiation of  
4 treatment for all OAB therapies, with low rates (<50%) already evident at 1 month.<sup>27 35 41</sup>  
5  
6 Longer follow-up periods showed that large proportions of patients discontinued treatment by  
7  
8 1 year (62–100%)<sup>15 23 29 32 39–41 43 44 50</sup> and by the end of 3 years, less than 10% of patients  
9  
10 continued on any antimuscarinic.<sup>50</sup> These steep reductions in rates of persistence over time  
11  
12 were mirrored by the reported adherence rates.  
13

14  
15 The chronic nature of OAB means that long-term use of medication is essential to  
16  
17 manage OAB symptoms and improve health outcomes. It is therefore important for patients  
18  
19 to receive first-line treatment that has a good efficacy-tolerability profile and evidence of  
20  
21 favorable persistence vs other treatment options. Among the antimuscarinics, solifenacin  
22  
23 and fesoterodine were generally associated with better persistence and adherence.<sup>15 23 37 47</sup>  
24  
25 In studies that assessed both mirabegron and antimuscarinics, persistence with mirabegron  
26  
27 was statistically significantly greater ( $p < 0.001$ ).<sup>15 23 27</sup> Adherence to mirabegron was also  
28  
29 greater; however, mean/median MPR values in the overall mirabegron populations did not  
30  
31 indicate medication adherence (<0.80). Although these studies did not directly assess the  
32  
33 reason(s) for the observed benefits of mirabegron, proposed reasons include lower rates of  
34  
35 bothersome anticholinergic adverse events, particularly dry-mouth, compared with  
36  
37 antimuscarinics and unmet expectations of antimuscarinic treatment.<sup>15 23 27</sup>  
38  
39

40  
41 It is well established that poor medication persistence and adherence reduces the ability  
42  
43 to achieve optimum clinical benefits and limits treatment success, especially for chronic  
44  
45 conditions such as OAB.<sup>12–14 40</sup> The unwillingness of patients to continue to take long-term  
46  
47 treatment has been observed across many chronic conditions, with non-adherence to  
48  
49 medication observed in ~50% of patients.<sup>12</sup> An analysis across six chronic conditions found  
50  
51 1-year persistence and adherence rates to be low for all conditions, and lowest for OAB  
52  
53 medications (antimuscarinics),<sup>29</sup> suggesting an unmet treatment need. However, this study  
54  
55 was performed prior to the availability of mirabegron for use in routine clinical practice, and  
56  
57 therefore an updated analysis of persistence in chronic conditions might be warranted.  
58  
59  
60

1  
2  
3 As alluded to above, persistence and adherence to treatment is expected to improve  
4 outcomes for patients with OAB. Two studies have reported that patients compliant and  
5 adherent to OAB medication experienced significantly improved urinary symptoms and  
6 HRQoL compared with patients who were non-persistent.<sup>54 55</sup> These data are consistent with  
7 studies describing other chronic diseases, such as diabetes and depression, where good  
8 adherence resulted in improved health outcomes<sup>13 56</sup> as well as reduced complications and  
9 disability, and improved HRQoL and life expectancy.<sup>57</sup> Moreover, greater persistence and  
10 adherence to treatment for OAB is associated with significantly lower medical, sick leave and  
11 short-term disability costs.<sup>45</sup> Indeed, economic models based on real-world inputs suggest  
12 that improved persistence with mirabegron translates into benefits of reduced healthcare  
13 resource use, and lower direct and indirect costs of treatment compared with  
14 antimuscarinics.<sup>24 58</sup> Additionally, mirabegron is reported to be cost effective vs six  
15 antimuscarinics from commercial and Medicare perspectives in the United States, due to  
16 fewer projected adverse events and comorbidities, and data suggesting better persistence.<sup>59</sup>

17  
18  
19  
20  
21  
22  
23  
24  
25  
26  
27  
28  
29  
30  
31 Independent variables for treatment discontinuation were studied by at least half of the  
32 papers included in our literature review, of which sex, age, comorbidities and previous  
33 experience of OAB medications were shown to be important factors in more than two  
34 studies. Only six studies reported switch-rates and although these were low, the treatment  
35 strategy of cycling antimuscarinic agents in patients who do not achieve symptom relief is  
36 common in clinical practice. Yet recent analysis of real-world data suggests that switching  
37 antimuscarinics may provide sub-optimal care.<sup>51</sup> In contrast, switching to mirabegron from  
38 antimuscarinic therapy has proved beneficial in over 50% of patients with OAB in an  
39 observational study.<sup>60</sup>

40  
41  
42  
43  
44  
45  
46  
47  
48  
49  
50 This review represents a large pooled analysis of real-world data for persistence and  
51 adherence to oral OAB medication across different geographical locations (Canada, Czech  
52 Republic, Denmark, Germany, Norway, Spain, the United Kingdom and the United States);  
53 however, there were no identifiable trends between data and countries. The definitions and  
54  
55  
56  
57

1  
2  
3 calculations of persistence and adherence were not uniform across the literature and the  
4 terms were often used interchangeably. This lack of consistency led to some limitations on  
5 the ability to compare across studies. Other limitations to performing cross-study  
6 comparisons or pooled analyses in this SLR include differences in the individual study  
7 populations and/or study designs, resulting in considerable variations between data. For  
8 example, the median TTD for oxybutynin ER and tolterodine ER were determined to be 5.1  
9 and 5.5 months, respectively, by one study,<sup>50</sup> but only 60 and 56 days, respectively, by  
10 another study.<sup>15</sup>

11  
12  
13  
14  
15  
16  
17  
18  
19 Furthermore, it is very difficult to capture the specific reasons for treatment  
20 discontinuation from prescription-driven or medical claim data rather than patient-derived  
21 data.<sup>15</sup> The current review excluded data from RCTs to better reflect patient behavior in the  
22 general OAB population in real-life clinical practice.<sup>11</sup> Only one paper included in our review  
23 reported that antimuscarinic side effects were significantly associated with discontinuation,<sup>44</sup>  
24 despite reports that such side effects are bothersome and a common reason for  
25 discontinuation of antimuscarinic treatment.<sup>11 16 25</sup> Additional factors that could not be  
26 assessed by our study, but can influence persistence with treatment in OAB patients are  
27 patient expectations, appropriate counselling and patient satisfaction with treatment.<sup>11 14 25</sup>

28  
29  
30  
31  
32  
33  
34  
35  
36  
37  
38 In addition to the limitations listed above, it should be noted that Sicras-Mainar *et al*<sup>36 37</sup>  
39 reported data on the same patient group (in terms of demographics and the  
40 timeframe/geographical source). This is also the case for two studies published by Sicras-  
41 Mainar *et al* in 2013 and 2014.<sup>48 61</sup> Also, this SLR excluded data on non-oral  
42 pharmacotherapies (eg, onabotulinum toxin A) and combination mirabegron plus  
43 antimuscarinic therapies, where additional efficacy has been reported compared to the  
44 monotherapies.<sup>62</sup> Further research on persistence and adherence to these OAB therapies is  
45 needed to better evaluate current treatment options. Additional studies are also required to  
46 improve our understanding of persistence and adherence in OAB, including qualitative  
47 studies to examine the reasons for discontinuation and real-world studies to examine

1  
2  
3 resource use associated with OAB medication in relation to adherence and persistence. As  
4 OAB is a chronic disease, clinicians should not only take into consideration the efficacy and  
5 side effects of an agent when deciding on treatment options, but also ensure that realistic  
6 patient expectations from treatment are set through patient education and counselling. The  
7 patient's life-style should also be considered as this is likely to impact adherence and  
8 persistence with OAB therapy.  
9  
10  
11  
12  
13

## 14 **CONCLUSIONS**

15  
16 Persistence and adherence were greater with mirabegron compared with antimuscarinics,  
17 and appeared to be greater with solifenacin and fesoterodine compared with other  
18 antimuscarinics. In addition, greater persistence and adherence were generally observed in  
19 patients who were female, older, treatment-experienced and receiving ER formulations.  
20 Together with the efficacy and tolerability data from clinical trials, these real-world data  
21 suggest a benefit from using mirabegron as first-line oral pharmacotherapy for patients with  
22 OAB.  
23  
24  
25  
26  
27  
28  
29  
30  
31  
32  
33  
34  
35  
36  
37  
38  
39  
40  
41  
42  
43  
44  
45  
46  
47  
48  
49  
50  
51  
52  
53  
54  
55  
56  
57  
58  
59  
60



### **Contributorship Statement**

GY, PS, JN, ZH, ES and FF were involved in conceptualisation and design of the study and critical review of the manuscript. FF, PS and GY performed the data extraction. All authors approved the final manuscript as submitted.

### **Competing Interests**

ZH, JN and ES are employed by Astellas. FF has received a grant from Astellas for study design, data extraction and manuscript development.

### **Funding**

The study was supported by Astellas Pharma Global Development.

### **Data Sharing Statement**

The search strategy and all data supporting this study are provided as supplementary information accompanying this paper.

### **Acknowledgments**

Medical writing support was provided by Claire Chinn, PhD, and Kinnari Patel, PhD, of Bioscript Medical and funded by Astellas Pharma Global Development.

### **Abbreviations and Acronyms**

ER = extended-release

HRQoL = health-related quality of life

MPR = medication possession rate

OAB = overactive bladder

1  
2  
3 PDC = proportion of days covered  
4

5 PRISMA = Preferred Reporting Items for Systematic Reviews and Meta-Analyses  
6  
7

8 RCTs = randomised controlled trials  
9

10 SLR = systematic literature review  
11  
12

13  
14 TTD = time to discontinuation  
15  
16

17 UTI = urinary tract infection  
18  
19  
20  
21  
22  
23  
24  
25  
26  
27  
28  
29  
30  
31  
32  
33  
34  
35  
36  
37  
38  
39  
40  
41  
42  
43  
44  
45  
46  
47  
48  
49  
50  
51  
52  
53  
54  
55  
56  
57  
58  
59  
60

**REFERENCES**

1. Abrams P, Cardozo L, Fall M, *et al*. The standardisation of terminology of lower urinary tract function: report from the Standardisation Sub-committee of the International Continence Society. *Neurourol Urodyn* 2002;21(2):167-78.
2. Eapen RS, Radomski SB. Review of the epidemiology of overactive bladder. *Res Rep Urol* 2016;8:71-6. doi: 10.2147/RRU.S102441
3. Brown JS, McGhan WF, Chokroverty S. Comorbidities associated with overactive bladder. *Am J Manag Care* 2000;6(11 Suppl):S574-9.
4. Subak LL, Richter HE, Hunskaar S. Obesity and urinary incontinence: epidemiology and clinical research update. *J Urol* 2009;182(6 Suppl):S2-7. doi: 10.1016/j.juro.2009.08.071
5. Coyne KS, Payne C, Bhattacharyya SK, *et al*. The impact of urinary urgency and frequency on health-related quality of life in overactive bladder: results from a national community survey. *Value Health* 2004;7(4):455-63. doi: 10.1111/j.1524-4733.2004.74008.x
6. Coyne KS, Sexton CC, Kopp ZS, *et al*. The impact of overactive bladder on mental health, work productivity and health-related quality of life in the UK and Sweden: results from EpiLUTS. *BJU Int* 2011;108(9):1459-71. doi: 10.1111/j.1464-410X.2010.10013.x
7. Herschorn S. Global perspective of treatment failures. *Can Urol Assoc J* 2013;7(9-10 Suppl 4):S170-1. doi: 10.5489/cuaj.1613
8. Irwin DE, Mungapen L, Milsom I, *et al*. The economic impact of overactive bladder syndrome in six Western countries. *BJU Int* 2009;103(2):202-9. doi: 10.1111/j.1464-410X.2008.08036.x

- 1  
2  
3 9. Onukwugha E, Zuckerman IH, McNally D, *et al*. The total economic burden of overactive  
4 bladder in the United States: a disease-specific approach. *Am J Manag Care*  
5 2009;15(4 Suppl):S90-7.  
6  
7  
8  
9  
10 10. Lucas M, Bedretidnova D, Berghmans L, *et al*. European Association of Urology.  
11 Guidelines on urinary incontinence. 2015. [http://uroweb.org/wp-content/uploads/20-](http://uroweb.org/wp-content/uploads/20-Urinary-Incontinence_LR1.pdf)  
12 [Urinary-Incontinence\\_LR1.pdf](http://uroweb.org/wp-content/uploads/20-Urinary-Incontinence_LR1.pdf) (accessed October 2016).  
13  
14  
15  
16 11. Kim TH, Lee KS. Persistence and compliance with medication management in the  
17 treatment of overactive bladder. *Investig Clin Urol* 2016;57(2):84-93. doi:  
18 10.4111/icu.2016.57.2.84  
19  
20  
21  
22  
23 12. Brown MT, Bussell J, Dutta S, *et al*. Medication adherence: truth and consequences. *Am*  
24 *J Med Sci* 2016;351(4):387-99. doi: 10.1016/j.amjms.2016.01.010  
25  
26  
27  
28 13. World Health Organization. Adherence to long-term therapies: evidence for action. 2003.  
29 [http://www.who.int/chp/knowledge/publications/adherence\\_report/en/](http://www.who.int/chp/knowledge/publications/adherence_report/en/) (accessed  
30 November 2016).  
31  
32  
33  
34  
35 14. Benner JS, Nichol MB, Rovner ES, *et al*. Patient-reported reasons for discontinuing  
36 overactive bladder medication. *BJU Int* 2010;105(9):1276-82. doi: 10.1111/j.1464-  
37 410X.2009.09036.x  
38  
39  
40  
41  
42 15. Chapple CR, Nazir J, Hakimi Z, *et al*. Persistence and adherence with mirabegron  
43 versus antimuscarinic agents in patients with overactive bladder: a retrospective  
44 observational study in UK clinical practice. *Eur Urol* 2017;72(3):389-99. doi:  
45 10.1016/j.eururo.2017.01.037  
46  
47  
48  
49  
50  
51 16. Sexton CC, Notte SM, Maroulis C, *et al*. Persistence and adherence in the treatment of  
52 overactive bladder syndrome with anticholinergic therapy: a systematic review of the  
53 literature. *Int J Clin Pract* 2011;65(5):567-85. doi: 10.1111/j.1742-1241.2010.02626.x  
54  
55  
56  
57  
58  
59  
60

- 1  
2  
3 17. Veenboer PW, Bosch JL. Long-term adherence to antimuscarinic therapy in everyday  
4 practice: a systematic review. *J Urol* 2014;191(4):1003-8. doi:  
5 10.1016/j.juro.2013.10.046  
6  
7  
8  
9  
10 18. European Medicines Agency. Mirabegron summary of product characteristics. 2016.  
11 [http://www.ema.europa.eu/docs/en\\_GB/document\\_library/EPAR\\_-](http://www.ema.europa.eu/docs/en_GB/document_library/EPAR_-_Product_Information/human/002388/WC500137309.pdf)  
12 [\\_Product\\_Information/human/002388/WC500137309.pdf](http://www.ema.europa.eu/docs/en_GB/document_library/EPAR_-_Product_Information/human/002388/WC500137309.pdf) (accessed December  
13 2016).  
14  
15  
16  
17  
18 19. Food and Drug Administration. Drug approval package. Myrbetriq (mirabegron) extended  
19 release tablets. 2012.  
20 [https://www.accessdata.fda.gov/drugsatfda\\_docs/nda/2012/202611Orig1s000TOC.cfm](https://www.accessdata.fda.gov/drugsatfda_docs/nda/2012/202611Orig1s000TOC.cfm).  
21  
22  
23  
24  
25  
26  
27 20. Pharmaceuticals and Medical Devices Agency. Betanis. Review of deliberation results.  
28 2011; (August 2017). <http://www.pmda.go.jp/files/000204240.pdf>.  
29  
30  
31  
32 21. Maman K, Aballea S, Nazir J, *et al*. Comparative efficacy and safety of medical  
33 treatments for the management of overactive bladder: a systematic literature review  
34 and mixed treatment comparison. *Eur Urol* 2014;65(4):755-65. doi:  
35 10.1016/j.eururo.2013.11.010  
36  
37  
38  
39  
40  
41 22. Kobayashi M, Nukui A, Kamai T. Comparative efficacy and tolerability of antimuscarinic  
42 agents and the selective beta3-adrenoceptor agonist, mirabegron, for the treatment  
43 of overactive bladder: which is more preferable as an initial treatment? *Low Urin*  
44 *Tract Symptoms* 2016:Epub ahead of print. doi: 10.1111/luts.12153  
45  
46  
47  
48  
49  
50 23. Wagg A, Franks B, Ramos B, *et al*. Persistence and adherence with the new beta-3  
51 receptor agonist, mirabegron, versus antimuscarinics in overactive bladder: early  
52 experience in Canada. *Can Urol Assoc J* 2015;9(9-10):343-50. doi:  
53 10.5489/cuaj.3098  
54  
55  
56  
57  
58  
59  
60

- 1  
2  
3 24. Nazir J, Berling M, McCrea C, *et al.* Economic impact of mirabegron versus  
4  
5 antimuscarinics for the treatment of overactive bladder in the UK.  
6  
7 *Pharmacoeconomics Open* 2017;1:25-36.  
8  
9  
10 25. Basra RK, Wagg A, Chapple C, *et al.* A review of adherence to drug therapy in patients  
11  
12 with overactive bladder. *BJU Int* 2008;102(7):774-9. doi: 10.1111/j.1464-  
13  
14 410X.2008.07769.x  
15  
16  
17 26. Moher D, Liberati A, Tetzlaff J, *et al.* Preferred reporting items for systematic reviews and  
18  
19 meta-analyses: the PRISMA statement. *Int J Surg* 2010;8(5):336-41. doi:  
20  
21 10.1016/j.ijsu.2010.02.007  
22  
23  
24 27. Nitti VM, Rovner ES, Franks B, *et al.* Persistence with mirabegron versus tolterodine in  
25  
26 patients with overactive bladder. *Am J Pharm Benefits* 2016;8(2):e25-e33.  
27  
28  
29 28. Wagg A, Diles D, Berner T. Treatment patterns for patients on overactive bladder  
30  
31 therapy: a retrospective statistical analysis using Canadian claims data. *JHEOR*  
32  
33 2015;3(1):43-55.  
34  
35  
36 29. Yeaw J, Benner JS, Walt JG, *et al.* Comparing adherence and persistence across 6  
37  
38 chronic medication classes. *J Manag Care Pharm* 2009;15(9):728-40. doi:  
39  
40 10.18553/jmcp.2009.15.9.728  
41  
42  
43 30. Brostrom S, Hallas J. Persistence of antimuscarinic drug use. *Eur J Clin Pharmacol*  
44  
45 2009;65(3):309-14. doi: 10.1007/s00228-008-0600-9  
46  
47  
48 31. Desgagne A, LeLorier J. Incontinence drug utilization patterns in Quebec, Canada. *Value*  
49  
50 *Health* 1999;2(6):452-8. doi: 10.1046/j.1524-4733.1999.26005.x  
51  
52  
53 32. Gomes T, Juurlink DN, Mamdani MM. Comparative adherence to oxybutynin or  
54  
55 tolterodine among older patients. *Eur J Clin Pharmacol* 2012;68(1):97-9. doi:  
56  
57 10.1007/s00228-011-1090-8  
58  
59  
60

- 1  
2  
3 33. Ivanova JI, Hayes-Larson E, Sorg RA, *et al.* Healthcare resource use and costs of  
4 privately insured patients who switch, discontinue, or persist on anti-muscarinic  
5 therapy for overactive bladder. *J Med Econ* 2014;17(10):741-50. doi:  
6  
7 10.3111/13696998.2014.941066  
8  
9  
10  
11 34. Krhut J, Gartner M, Petzel M, *et al.* Persistence with first line anticholinergic medication  
12 in treatment-naive overactive bladder patients. *Scand J Urol* 2014;48(1):79-83. doi:  
13  
14 10.3109/21681805.2013.814707  
15  
16  
17  
18 35. Perfetto EM, Subedi P, Jumadilova Z. Treatment of overactive bladder: a model  
19 comparing extended-release formulations of tolterodine and oxybutynin. *Am J Manag*  
20  
21 *Care* 2005;11(4 Suppl):S150-7.  
22  
23  
24  
25 36. Sicras-Mainar A, Navarro-Artieda R, Ruiz-Torrejon A, *et al.* Impact of loss of work  
26 productivity in patients with overactive bladder treated with antimuscarinics in Spain:  
27 study in routine clinical practice conditions. *Clin Drug Investig* 2015;35(12):795-805.  
28  
29 doi: 10.1007/s40261-015-0342-2  
30  
31  
32  
33  
34 37. Sicras-Mainar A, Navarro-Artieda R, Ruiz-Torrejon A, *et al.* Persistence and concomitant  
35 medication in patients with overactive bladder treated with antimuscarinic agents in  
36 primary care. An observational baseline study. *Actas Urol Esp* 2016;40(2):96-101.  
37  
38 doi: 10.1016/j.acuro.2015.09.004  
39  
40  
41  
42  
43 38. Sicras-Mainar A, Rejas-Gutierrez J, Navarro-Artieda R, *et al.* Use of health care  
44 resources and associated costs in non-institutionalized vulnerable elders with  
45 overactive bladder treated with antimuscarinic agents in the usual medical practice.  
46  
47 *Actas Urol Esp* 2014;38(8):530-7. doi: 10.1016/j.acuro.2014.02.001  
48  
49  
50  
51  
52 39. Suehs BT, Davis C, Franks B, *et al.* Effect of potentially inappropriate use of  
53 antimuscarinic medications on healthcare use and cost in individuals with overactive  
54 bladder. *J Am Geriatr Soc* 2016;64(4):779-87. doi: 10.1111/jgs.14030  
55  
56  
57  
58  
59  
60

- 1  
2  
3 40. Wagg A, Compion G, Fahey A, *et al.* Persistence with prescribed antimuscarinic therapy  
4 for overactive bladder: a UK experience. *BJU Int* 2012;110(11):1767-74. doi:  
5 10.1111/j.1464-410X.2012.11023.x  
6  
7  
8  
9  
10 41. Yu YF, Nichol MB, Yu AP, *et al.* Persistence and adherence of medications for chronic  
11 overactive bladder/urinary incontinence in the California Medicaid program. *Value*  
12 *Health* 2005;8(4):495-505. doi: 10.1111/j.1524-4733.2005.00041.x  
13  
14  
15  
16 42. D'Souza AO, Smith MJ, Miller LA, *et al.* Persistence, adherence, and switch rates among  
17 extended-release and immediate-release overactive bladder medications in a  
18 regional managed care plan. *J Manag Care Pharm* 2008;14(3):291-301. doi:  
19 10.18553/jmcp.2008.14.3.291  
20  
21  
22  
23  
24  
25 43. Johnston S, Janning SW, Haas GP, *et al.* Comparative persistence and adherence to  
26 overactive bladder medications in patients with and without diabetes. *Int J Clin Pract*  
27 2012;66(11):1042-51. doi: 10.1111/j.1742-1241.2012.03009.x  
28  
29  
30  
31  
32 44. Kalder M, Pantazis K, Dinas K, *et al.* Discontinuation of treatment using anticholinergic  
33 medications in patients with urinary incontinence. *Obstet Gynecol* 2014;124(4):794-  
34 800. doi: 10.1097/AOG.0000000000000468  
35  
36  
37  
38  
39 45. Kleinman NL, Odell K, Chen CI, *et al.* Persistence and adherence with urinary  
40 antispasmodic medications among employees and the impact of adherence on costs  
41 and absenteeism. *J Manag Care Spec Pharm* 2014;20(10):1047-56. doi:  
42 10.18553/jmcp.2014.20.10.1047  
43  
44  
45  
46  
47  
48 46. Manack A, Motsko SP, Haag-Molkenteller C, *et al.* Epidemiology and healthcare  
49 utilization of neurogenic bladder patients in a US claims database. *Neurourol Urodyn*  
50 2011;30(3):395-401. doi: 10.1002/nau.21003  
51  
52  
53  
54  
55  
56  
57  
58  
59  
60



- 1  
2  
3 47. Mauseth SA, Skurtveit S, Spigset O. Adherence, persistence and switch rates for  
4  
5 anticholinergic drugs used for overactive bladder in women: data from the Norwegian  
6  
7 Prescription Database. *Acta Obstet Gynecol Scand* 2013;92(10):1208-15. doi:  
8  
9 10.1111/aogs.12196  
10  
11  
12 48. Sicras-Mainar A, Rejas J, Navarro-Artieda R, *et al.* Antimuscarinic persistence patterns  
13  
14 in newly treated patients with overactive bladder: a retrospective comparative  
15  
16 analysis. *Int Urogynecol J* 2014;25(4):485-92. doi: 10.1007/s00192-013-2250-4  
17  
18  
19 49. Sussman D, Yehoshua A, Kowalski J, *et al.* Adherence and persistence of mirabegron  
20  
21 and anticholinergic therapies in patients with overactive bladder: a real-world claims  
22  
23 data analysis. *Int J Clin Pract* 2017;71(3-4):e12824. doi: 10.1111/ijcp.12824  
24  
25  
26 50. Gopal M, Haynes K, Bellamy SL, *et al.* Discontinuation rates of anticholinergic  
27  
28 medications used for the treatment of lower urinary tract symptoms. *Obstet Gynecol*  
29  
30 2008;112(6):1311-8. doi: 10.1097/AOG.0b013e31818e8aa4  
31  
32  
33 51. Chancellor MB, Migliaccio-Walle K, Bramley TJ, *et al.* Long-term patterns of use and  
34  
35 treatment failure with anticholinergic agents for overactive bladder. *Clin Ther*  
36  
37 2013;35(11):1744-51. doi: 10.1016/j.clinthera.2013.08.017  
38  
39  
40 52. Sears CL, Lewis C, Noel K, *et al.* Overactive bladder medication adherence when  
41  
42 medication is free to patients. *J Urol* 2010;183(3):1077-81. doi:  
43  
44 10.1016/j.juro.2009.11.026  
45  
46  
47 53. Pelletier EM, Vats V, Clemens JQ. Pharmacotherapy adherence and costs versus  
48  
49 nonpharmacologic management in overactive bladder. *Am J Manag Care* 2009;15(4  
50  
51 Suppl):S108-14.  
52  
53  
54  
55  
56  
57  
58  
59  
60

- 1  
2  
3 54. Andy UU, Arya LA, Smith AL, *et al.* Is self-reported adherence associated with clinical  
4 outcomes in women treated with anticholinergic medication for overactive bladder?  
5  
6 *Neurourol Urodyn* 2016;35(6):738-42. doi: 10.1002/nau.22798  
7  
8  
9  
10 55. Kim TH, Choo MS, Kim YJ, *et al.* Drug persistence and compliance affect patient-  
11 reported outcomes in overactive bladder syndrome. *Qual Life Res* 2016;25(8):2021-  
12 9. doi: 10.1007/s11136-015-1216-z  
13  
14  
15  
16 56. Thompson C, Peveler RC, Stephenson D, *et al.* Compliance with antidepressant  
17 medication in the treatment of major depressive disorder in primary care: a  
18 randomized comparison of fluoxetine and a tricyclic antidepressant. *Am J Psychiatry*  
19 2000;157(3):338-43. doi: 10.1176/appi.ajp.157.3.338  
20  
21  
22  
23  
24  
25 57. Anderson BJ, Vangsness L, Connell A, *et al.* Family conflict, adherence, and glycaemic  
26 control in youth with short duration Type 1 diabetes. *Diabet Med* 2002;19(8):635-42.  
27  
28  
29  
30 58. Hakimi Z, Nazir J, McCrea C, *et al.* Clinical and economic impact of mirabegron  
31 compared with antimuscarinics for the treatment of overactive bladder in Canada. *J*  
32 *Med Econ* 2017;20(6):614-22. doi: 10.1080/13696998.2017.1294595  
33  
34  
35  
36  
37 59. Wielage RC, Perk S, Campbell NL, *et al.* Mirabegron for the treatment of overactive  
38 bladder: cost-effectiveness from US commercial health-plan and Medicare  
39 Advantage perspectives. *J Med Econ* 2016;19(12):1135-43. doi:  
40 10.1080/13696998.2016.1204307  
41  
42  
43  
44  
45  
46 60. Liao CH, Kuo HC. High satisfaction with direct switching from antimuscarinics to  
47 mirabegron in patients receiving stable antimuscarinic treatment. *Medicine*  
48 *(Baltimore)* 2016;95(45):e4962. doi: 10.1097/MD.0000000000004962  
49  
50  
51  
52  
53 61. Sicras-Mainar A, Rejas J, Navarro-Artieda R, *et al.* Health economics perspective of  
54 fesoterodine, tolterodine or solifenacin as first-time therapy for overactive bladder  
55  
56  
57  
58  
59  
60

1  
2  
3 syndrome in the primary care setting in Spain. *BMC Urol* 2013;13:51. doi:

4  
5 10.1186/1471-2490-13-51  
6

7  
8 62. Drake MJ, Chapple C, Esen AA, *et al.* Efficacy and safety of mirabegron add-on therapy  
9  
10 to solifenacin in incontinent overactive bladder patients with an inadequate response  
11  
12 to initial 4-week solifenacin monotherapy: a randomised double-blind multicentre  
13  
14 phase 3B study (BESIDE). *Eur Urol* 2016;70(1):136-45. doi:

15  
16 10.1016/j.eururo.2016.02.030  
17  
18  
19  
20  
21  
22  
23  
24  
25  
26  
27  
28  
29  
30  
31  
32  
33  
34  
35  
36  
37  
38  
39  
40  
41  
42  
43  
44  
45  
46  
47  
48  
49  
50  
51  
52  
53  
54  
55  
56  
57  
58  
59  
60

## FIGURE LEGENDS

### **Figure 1** Search strategy and selection of studies presented in the Preferred Reporting Items for Systematic Reviews and Meta-Analyses (PRISMA) flow diagram

\*Studies were excluded for the following reasons: outcome measure(s) of persistence and/or adherence, relevant to this systematic review (such as medication possession rate, proportion of days covered, discontinuation rate), were not presented within the full text of the article (n=17); adherence/persistence data were drawn from surveys, interviews or self-reports (n=13); cohort contained a portion of patients under 18 years of age (who could not be removed or isolated from results/data) (n=7); participants had prior awareness/knowledge of partaking in a study related to OAB medication (ie, open-label extension to a study or prior written consent) (n=6); a full article text was not available (ie, only a conference abstract) or the full text was not in English; or non-oral OAB medications were included within the presented results (and could not be removed or isolated from results/data) (n=1)

§Three of these studies were identified by reviewing reference lists of included studies and relevant systematic literature reviews

### **Figure 2** Frequency for reported determinants of discontinuation

\*In one study the relationship was not statistically significant

\*\*Includes dose, formulation, race, prior infection, financial burden, prescriber profession, side effects, medication co-payment and polypharmacy

1  
2  
3  
4  
5  
6  
7  
8  
9  
10  
11  
12  
13  
14  
15  
16  
17  
18  
19  
20  
21  
22  
23  
24  
25  
26  
27  
28  
29  
30  
31  
32  
33  
34  
35  
36  
37  
38  
39  
40  
41  
42  
43  
44  
45  
46  
47  
48  
49  
50  
51  
52  
53  
54  
55  
56  
57  
58  
59  
60

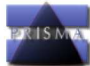

PRISMA 2009 Flow Diagram

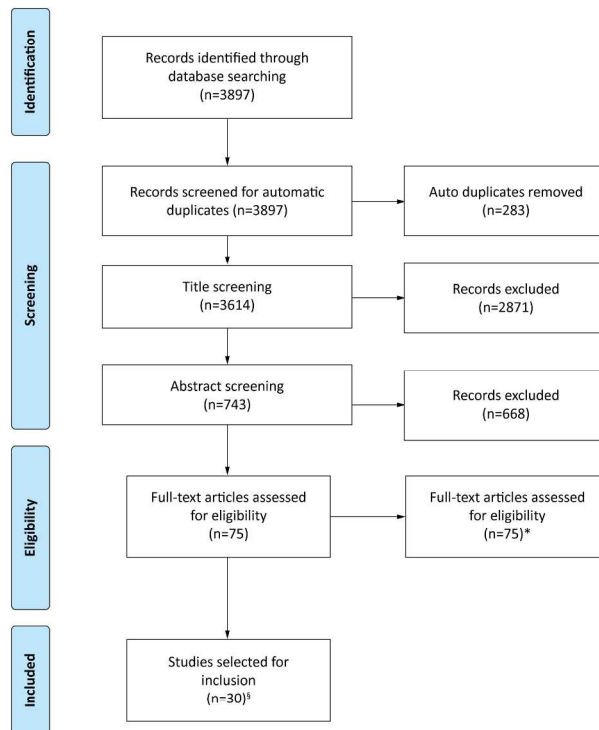

From: Moher D, Liberati A, Tetzlaff J, Altman DG, The PRISMA Group (2009). Preferred Reporting Items for Systematic Reviews and Meta-Analyses: The PRISMA Statement. PLoS Med 6(7): e1000097. doi:10.1371/journal.pmed1000097

For more information, visit [www.prisma-statement.org](http://www.prisma-statement.org).

Figure 1 Search strategy and selection of studies presented in the Preferred Reporting Items for Systematic Reviews and Meta-Analyses (PRISMA) flow diagram

215x279mm (300 x 300 DPI)

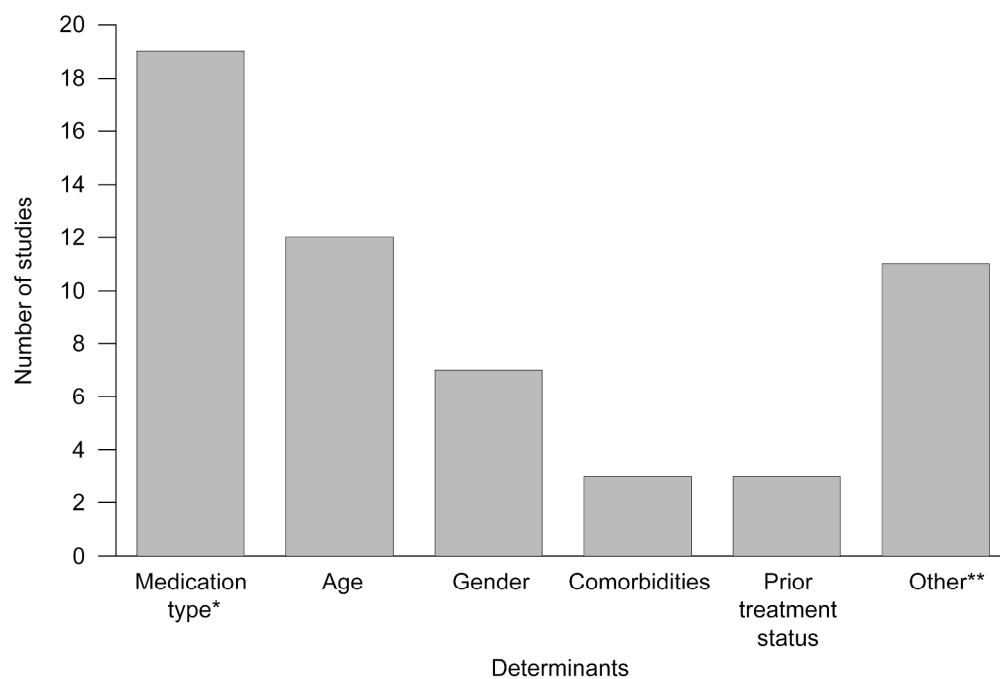

Figure 2 Frequency for reported determinants of discontinuation

273x182mm (300 x 300 DPI)

**Supplemental Table 1:** Patient characteristics, interventions and definitions/variables of persistence, adherence and discontinuation reported in the studies.

| Author (year) and country (database)                                                                                      | Participants                                                                                                                  | Drug/intervention*                                                                                                                                                                                                                                                                                                                                                                                                       | Definition of persistence/adherence/discontinuation and independent variables on persistence                                                                                                                                                                        | Length of follow-up |
|---------------------------------------------------------------------------------------------------------------------------|-------------------------------------------------------------------------------------------------------------------------------|--------------------------------------------------------------------------------------------------------------------------------------------------------------------------------------------------------------------------------------------------------------------------------------------------------------------------------------------------------------------------------------------------------------------------|---------------------------------------------------------------------------------------------------------------------------------------------------------------------------------------------------------------------------------------------------------------------|---------------------|
| Brostrøm and Hallas (2009) <sup>1</sup><br>Odense University Pharmacoepidemiological Database (OPED); Denmark (1999–2006) | n=2477<br>Male: n=836 (33.8%)<br>Female: n=1641 (66.2%)<br>Mean age: 68.3 years <sup>a</sup>                                  | Any prescription of OAB medication:<br>flavoxate (n=21)<br>oxybutynin TD (n=48)<br>tolterodine (n=1478)<br>solifenacin (n=774)<br>trospium (n=271)<br>darifenacin (n=52)                                                                                                                                                                                                                                                 | Patients who continued taking a particular drug for up to 7 years with no more than 120-day gaps were regarded as experiencing single-treatment episodes<br><br>Variables: age, gender, prior use of OAB agents and use of anti-diabetic drugs                      | Up to 7 years       |
| Chancellor et al (2013) <sup>2</sup><br>IMS Lifelink Database, Connecticut; USA (2005–2008)                               | n=103 250<br>Male: n≈25 916 <sup>a</sup> (25.1%)<br>Female: n≈77 334 <sup>a</sup> (74.9%)<br>Mean (SD) age: 58.7 (15.7) years | First (new) prescription of OAB medication in adults ≥18 years:<br>tolterodine ER (n=43 881) <sup>a</sup><br>solifenacin (n=15 488) <sup>a</sup><br>oxybutynin (n=15 075) <sup>a</sup><br>darifenacin (n=10 532) <sup>a</sup><br>oxybutynin ER (n=10 325) <sup>a</sup><br>oxybutynin TD (n=2272) <sup>a</sup><br>tolterodine (n=2581) <sup>a</sup><br>trospium (n=2478) <sup>a</sup><br>trospium ER (n=413) <sup>a</sup> | To be considered a discontinuation, patients were required to have a gap of at least 45 days in therapy based on fill dates and days' supply<br><br>Adherence rate was defined as the proportion of patients filling more than one prescription with an MPR of ≥80% | 2 years             |
| Chapple et al (2017) <sup>3</sup><br>Clinical Practice Research Datalink (CPRD); UK (2013–2014)                           | n=21 996<br>Male: n=6513 (29.6%)<br>Female: n=15 483 (70.4%)<br>Mean (SD) age: 63.9 (16.3) years                              | First (new) prescription of OAB medication in adults ≥18 years:<br>mirabegron (n=1203)<br>darifenacin (n=126)<br>fesoterodine (n=1287)<br>flavoxate (n=144)<br>oxybutynin ER (n=1144)<br>oxybutynin IR (n=5779)<br>propiverine (n=95)<br>solifenacin (n=8191)<br>tolterodine ER (n=1561)<br>tolterodine IR (n=1523)<br>trospium chloride (n=943)                                                                         | Treatment was defined as discontinued if the maximum allowable gap duration was at least 1.5 times the intended duration of the most recent prescription<br><br>Adherence rate was defined as mean MPR at 12 months                                                 | 1 year              |

| Author (year) and country (database)                                                                             | Participants                                                                                                                               | Drug/intervention*                                                                                                                                                                                        | Definition of persistence/adherence/discontinuation and independent variables on persistence                                                                                                                                                                                                                                                                                                          | Length of follow-up |
|------------------------------------------------------------------------------------------------------------------|--------------------------------------------------------------------------------------------------------------------------------------------|-----------------------------------------------------------------------------------------------------------------------------------------------------------------------------------------------------------|-------------------------------------------------------------------------------------------------------------------------------------------------------------------------------------------------------------------------------------------------------------------------------------------------------------------------------------------------------------------------------------------------------|---------------------|
| D'Souza et al (2008) <sup>4</sup><br>Undisclosed medical claims database; USA (1999–2004)                        | n=1117<br>Male: n≈206 <sup>a</sup> (18.4%)<br>Female: n≈911 <sup>a</sup> (81.6%)<br>Mean (SD) age: 55.7 (14.5) years                       | First index of an OAB medication in adults ≥18 years:<br>oxybutynin ER (n=249)<br>oxybutynin IR (n=108)<br>tolterodine ER (n=454)<br>tolterodine IR (n=306)                                               | Persistence was measured as the proportion of patients continuing therapy for 12 months without discontinuing the index drug or switching to other OAB drugs<br><br>Adherence rate was measured as the proportion of patients with an MPR of ≥0.80<br><br>Variables: age, gender, drug formulations and OAB-associated comorbidities (eg, falls/fractures, skin infections, UTIs, anxiety/depression) | 1 year              |
| Desgagné et al (1999) <sup>5</sup><br>Régie de l'assurance maladie du Québec (RAMQ) database; Canada (1994–1997) | n=6690<br>Male: n=2534 (37.9%)<br>Female: n=4156 (62.1%)<br>Mean age: 77.3 years <sup>a</sup>                                              | Patients aged ≥65 years with at least one prescription claim (first index) of:<br>oxybutynin (n=5718)<br>flavoxate (n=972)                                                                                | Persistence evaluated by percentage of patients refilling their initial prescription                                                                                                                                                                                                                                                                                                                  | Up to 4 years       |
| Gomes et al (2012) <sup>6</sup><br>Canada (Ontario Drug Benefit database of prescriptions)                       | n=56 851 <sup>a</sup><br>Male: n≈18 496 (32.5%) <sup>a</sup><br>Female: n≈38 355 (67.5%) <sup>a</sup><br>Mean age: 77.7 years <sup>a</sup> | Patients aged >65 years with a first index (new) claim of:<br>oxybutynin IR (n=31 996)<br>tolterodine ER/IR (n=24 855)                                                                                    | Persistence with treatment was defined by refills for the index drug within an interval defined by the duration specified on the prescription plus a 50% grace period                                                                                                                                                                                                                                 | 2 years             |
| Gopal et al (2008) <sup>7</sup><br>UK (Health Improvement Network database of prescriptions) (1991–2005)         | n=29 369<br>Male: n=0 (0%)<br>Female: n=29 369 (100%)<br>Mean (SD) age: 63.9 (16.8) years                                                  | Women aged ≥18 years prescribed anti-cholinergic medications:<br>tolterodine IR<br>tolterodine ER<br>oxybutynin IR<br>oxybutynin ER<br>flavoxate<br>terodiline<br>trospium<br>propriverine<br>solifenacin | Discontinuation was defined by no anticholinergic prescriptions issued within 90 days after the end of the last anticholinergic drug prescription<br><br>Anticholinergic medications were considered discontinued at the time a patient switched to another medication or as above<br><br>Variables: drug formulation                                                                                 | 3 years             |



| Author (year) and country (database)                                                                     | Participants                                                                                                           | Drug/intervention*                                                                                                                                                                                                                                                              | Definition of persistence/adherence/discontinuation and independent variables on persistence                                                                                                                                                                                                                                                                                                                                                                                                                                                                                                                                                           | Length of follow-up |
|----------------------------------------------------------------------------------------------------------|------------------------------------------------------------------------------------------------------------------------|---------------------------------------------------------------------------------------------------------------------------------------------------------------------------------------------------------------------------------------------------------------------------------|--------------------------------------------------------------------------------------------------------------------------------------------------------------------------------------------------------------------------------------------------------------------------------------------------------------------------------------------------------------------------------------------------------------------------------------------------------------------------------------------------------------------------------------------------------------------------------------------------------------------------------------------------------|---------------------|
| Ivanova et al (2014) <sup>8</sup><br>OptumHealth Reporting and Insights claims database; USA (2007–2012) | n=10 318<br>Male: n≈2822 (27.4%) <sup>a</sup><br>Female: n≈7496 (72.6%) <sup>a</sup><br>Mean age: 51.6 years           | Patients aged 18 to 64 receiving a new prescription of:<br>darifenacin (n=970) <sup>a</sup><br>solifenacin (n=2662) <sup>a</sup><br>oxybutynin (n=2889) <sup>a</sup><br>tolterodine (n=3116) <sup>a</sup><br>trospium (n=454) <sup>a</sup><br>fesoterodine (n=227) <sup>a</sup> | Persisters were defined as patients who did not switch or discontinue the index antimuscarinic during the first 6 months after the treatment initiation date<br><br>Discontinuation was defined by a gap of at least 60 days between refills within the first 6 months after the treatment initiation date<br><br>Switching was defined as a changed prescription from the index antimuscarinic within the first 6 months after the treatment initiation date (with a gap of 60 days between the end of the day supply of the index antimuscarinic and the new antimuscarinic)<br><br>Variables: age, gender, history of UTIs and index antimuscarinic | 6 months            |
| Johnston et al (2012) <sup>9</sup><br>Truven Health MarketScan® Database; USA (2004–2009)                | n=73 120<br>Male: n=29 406 (40.2%)<br>Female: n=43 714 (59.8%)<br>Mean age: 69.0 years <sup>a</sup>                    | First index drug in OAB patients with or without diabetes, aged ≥18 years:<br>darifenacin<br>oxybutynin<br>solifenacin<br>tolterodine<br>trospium                                                                                                                               | Persistence was measured as the number of days from the index date until a gap in OAB medication of ≥45 days<br><br>Adherence was assessed using the interval-based (fixed time-period) MPR (adherent patients had an ≥80% MPR)<br><br>Variables: age, gender and diabetes                                                                                                                                                                                                                                                                                                                                                                             | 1 year              |
| Kalder et al (2014) <sup>10</sup><br>Disease Analyzer database (IMS Health); Germany (2005–2012)         | n=26 834<br>Male: n≈9660 <sup>a</sup> (36%)<br>Female: n≈17 174 <sup>a</sup> (64%)<br>Mean (SD) age: 69.4 (13.2) years | First index (new) prescription in patients aged ≥18 years:<br>darifenacin (n=1995)<br>fesoterodine (=811)<br>oxybutynin (n=3813)<br>propiverine (n=2714)<br>solifenacin (n=4844)<br>tolterodine (n=1814)<br>trospium (n=10 843)                                                 | Treatment discontinuation was defined as a period of 90 days without prescription of UI therapy but with at least one visit to the same doctor after 90 days<br><br>Variables: age, gender, comorbidity burden (including diabetes) and antimuscarinic side-effects                                                                                                                                                                                                                                                                                                                                                                                    | 3 years             |

| Author (year) and country (database)                                                                                                                  | Participants                                                                                                                                  | Drug/intervention*                                                                                                                                                                                                                   | Definition of persistence/adherence/discontinuation and independent variables on persistence                                                                                                                                                                                                                                                                                                                                                                                                                          | Length of follow-up |
|-------------------------------------------------------------------------------------------------------------------------------------------------------|-----------------------------------------------------------------------------------------------------------------------------------------------|--------------------------------------------------------------------------------------------------------------------------------------------------------------------------------------------------------------------------------------|-----------------------------------------------------------------------------------------------------------------------------------------------------------------------------------------------------------------------------------------------------------------------------------------------------------------------------------------------------------------------------------------------------------------------------------------------------------------------------------------------------------------------|---------------------|
| Kleinman et al (2014) <sup>11</sup><br>Human Capital Management Services [HCMS] Research Reference Database; USA (2001–2011)                          | n=2960<br>Male: n=878 (29.7%)<br>Female: n=2082 (70.3%)<br>Mean age: 46.6 years                                                               | First index of OAB medication in adults aged 18 to 64 years:<br>darifenacin<br>fesoterodine<br>oxybutynin<br>flavoxate <sup>b</sup><br>solifenacin<br>tolterodine<br>trospium<br>hyoscyamine <sup>b</sup><br>imipramine <sup>b</sup> | Persistence was measured as the number of days from index UA prescription until first $\geq 30$ -day gap in UA medication supply<br><br>Adherence was measured as the percentage of the annual post-index period with available medication                                                                                                                                                                                                                                                                            | 1 year              |
| Krhut et al (2014) <sup>12</sup><br>Dept. of Urology and Dept. of Gynaecology and Obstetrics, University Hospital Ostrava; Czech Republic (2009–2010) | n=377<br>Male: n=52 (13.8%)<br>Female: n=325 (86.2%)<br>Mean (SD) age: 60.3 (13.8) years                                                      | First (new) index of OAB medication within patients attending hospital as an outpatient:<br>trospium (n=189)<br>propiverine (n=41)<br>tolterodine ER (n=9)<br>solifenacin (n=48)<br>fesoterodine (n=90)                              | Persistence was assessed according to the patient records                                                                                                                                                                                                                                                                                                                                                                                                                                                             | 1 year              |
| Manack et al (2011) <sup>13</sup><br>Thomson Reuters MarketScan <sup>®</sup> Commercial and Medicare Supplemental Databases; USA (2002–2007)          | n=46 271 <sup>c</sup><br>Male: n=19 727 (42.6%)<br>Female: n=26 544 (57.4%)<br>Mean (SD) age: 62.5 (19.6) years                               | Patients with neurogenic bladder origin (such as spinal cord injury and multiple sclerosis) receiving an oral OAB medication                                                                                                         | Continuation was defined as $\geq 365$ days of OAB oral drug use beginning at the index date with $\leq 90$ days between the end of therapy and end of eligibility<br><br>Discontinuation was defined as $\geq 6$ months of no OAB oral drug use between the end of therapy and the end of eligibility                                                                                                                                                                                                                | 1 year              |
| Mauseth et al (2013) <sup>14</sup><br>The Norwegian Prescription Database; Norway (2004–2010)                                                         | n=32 178<br>Male: n=0 (0.0%)<br>Female: n=32 178 (100.0%)<br>No mean age reported. The majority of patients (60.5%) were aged $\geq 60$ years | Adult patients aged $\geq 18$ years with a first index (new) prescription of:<br>tolterodine (n=12 389)<br>solifenacin (n=13 682)<br>darifenacin (n=4399)<br>fesoterodine (n=1708)                                                   | Persistence defined as the population who had not discontinued the drug during a period of 365 days after the index date<br><br>A switch was defined as a prescription for another of the drugs included in the study within 365 days after the index date<br><br>Adherence was measured using MPR (sum of days of supply for all tablets purchased, except those received at the last fill, divided by the total number of days from the first to the last filling)<br><br>Variables: age and initial antimuscarinic | 1 year              |

| Author (year) and country (database)                                                               | Participants                                                                                               | Drug/intervention*                                                                                                                                        | Definition of persistence/adherence/discontinuation and independent variables on persistence                                                                                                                                                                                                                                                                                         | Length of follow-up |
|----------------------------------------------------------------------------------------------------|------------------------------------------------------------------------------------------------------------|-----------------------------------------------------------------------------------------------------------------------------------------------------------|--------------------------------------------------------------------------------------------------------------------------------------------------------------------------------------------------------------------------------------------------------------------------------------------------------------------------------------------------------------------------------------|---------------------|
| Nitti et al (2016) <sup>15</sup><br>Optum Database; USA<br>(2010–2013)                             | n=2628<br>Male: n=602 (22.9%)<br>Female: n=2026 (77.1%)<br>Mean age: 57.3 years <sup>a</sup>               | New and existing users aged ≥18 years treated with:<br>mirabegron (n=380)<br>tolterodine ER (n=2248)                                                      | Persistence was defined as a continuous supply of index drug until any 30-day period during which the patient did not have a supply of index drug<br><br>Adherence: the proportion of days covered by the prescription was calculated using prescription fill dates and number of days' supply for each fill of a prescription                                                       | 6 months            |
| Pelletier et al (2009) <sup>16</sup><br>PharMetrics Patient-Centric Database; USA<br>(2005–2006)   | n=43 367<br>Male: n=9675 (22.3%)<br>Female: n=33 692 (77.7%)<br>Mean (SD) age: 51.1 (12.4) years           | Adults aged ≥18 years receiving a first index (new) prescription of:<br>tolterodine ER<br>oxybutynin<br>solifenacin<br>darifenacin<br>trospium            | Adherence was measured by PDC over the 12-month post index period (adherent patients had an ≥80% PDC)<br><br>Variables: age, gender and comorbidity burden (including COPD, congestive heart failure, diabetes, hypertension)                                                                                                                                                        | 1 year              |
| Perfetto et al (2005) <sup>17</sup><br>PharMetrics Patient-Centric Database; USA<br>(2001–2003)    | n=23 328<br>No patient demographics were reported                                                          | All patients with either a new diagnosis of OAB or new use of:<br>tolterodine ER<br>oxybutynin ER                                                         | Discontinuation rates were calculated                                                                                                                                                                                                                                                                                                                                                | 11 months           |
| Sears et al (2010) <sup>18</sup><br>Military Health System; USA<br>(2003–2006)                     | n=7858<br>Male: n=2357 (30.0%)<br>Female: n=5501 (70.0%)<br>Age was not reported                           | Military treatment facility enrollees prescribed:<br>oxybutynin ER (n=136)<br>oxybutynin IR (n=2003)<br>tolterodine ER (n=4716)<br>tolterodine IR (n=992) | Non-persistence was defined as patients who never refilled a prescription for any OAB medication during the 3-year study period<br><br>Medication switch rate was calculated as the proportion of patients who changed medication or dose at least once<br><br>Adherence was defined as the proportion of patients with an MPR of ≥80%<br><br>Variables: gender and drug formulation | 3 years             |
| Sicras-Mainar et al (2016) <sup>d,19</sup><br>Primary care medical databases; Spain<br>(2008–2013) | n=3094<br>Male: n≈1170 <sup>a</sup> (37.8%)<br>Female: n≈1924 <sup>a</sup> (62.2%)<br>Mean age: 54.0 years | Adults aged 20 to 64 with a first index (new) prescription of:<br>fesoterodine (n=859)<br>solifenacin (n=1330)<br>tolterodine (n=905)                     | Discontinuation was defined as when the patient switched to another active substance, another drug was added (combination) or the medication was discontinued completely or discontinued for ≥60 days without renewal and ≥2 prescriptions<br><br>Compliance was calculated using MPR<br><br>Variables: concomitant medication (antidepressants, antibiotics) and index drug         | 1 year              |

| Author (year) and country (database)                                                                                   | Participants                                                                                                                                                         | Drug/intervention*                                                                                                                     | Definition of persistence/adherence/discontinuation and independent variables on persistence                                                                                                                                                                                                                                                                                                                                                                               | Length of follow-up |
|------------------------------------------------------------------------------------------------------------------------|----------------------------------------------------------------------------------------------------------------------------------------------------------------------|----------------------------------------------------------------------------------------------------------------------------------------|----------------------------------------------------------------------------------------------------------------------------------------------------------------------------------------------------------------------------------------------------------------------------------------------------------------------------------------------------------------------------------------------------------------------------------------------------------------------------|---------------------|
| Sicras-Mainar et al (2015) <sup>d,20</sup><br>Primary care medical databases; Spain (2008–2013)                        | n=3094<br>Male: n≈1170 <sup>a</sup> (37.8%)<br>Female: n≈1924 <sup>a</sup> (62.2%)<br>Mean (SD) age: 54.0 (9.2) years                                                | Adults aged ≥20 years with a first index (new) prescription of:<br>fesoterodine (n=859)<br>solifenacin (n=1330)<br>tolterodine (n=905) | Persistence was defined as the time, measured in months, without stopping the initial treatment or switching to another medication at least 30 days after the initial prescription<br><br>Compliance was defined according to ISPOR criteria and was calculated based on the MPR, which was evaluated from the first to the last prescription and represented the number of days of medication taken over the number of days in treatment (commencing from the start date) | 1 year              |
| Sicras-Mainar et al (2014a) <sup>21</sup><br>Primary care medical databases; Spain (2008–2010)                         | n=552<br>Male: n≈272 <sup>a</sup> (49.2%)<br>Female: n≈280 <sup>a</sup> (50.8%)<br>Mean (SD) age: 80.2 (4.0) years                                                   | Adults aged ≥75 years with a first index (new) prescription of:<br>fesoterodine (n=58)<br>solifenacin (n=252)<br>tolterodine (n=212)   | Persistence was defined as the time, in weeks, with no drop-out from initial treatment or with no switch to another medication at least 30 days following initial prescription<br><br>Compliance was defined according to ISPOR criteria and was calculated based on the medication use/possession rate                                                                                                                                                                    | 1 year              |
| Sicras-Mainar et al (2014b) <sup>e,22</sup><br>Primary care medical databases; Spain (2008–2010)                       | n=1971<br>Male: n=821 (41.7%)<br>Female: n=1150 (58.3%)<br>Mean (SD) age: 70.1 (10.6) years                                                                          | Adults aged ≥18 years with a first index (new) prescription of:<br>fesoterodine (n=302)<br>solifenacin (n=952)<br>tolterodine (n=717)  | Discontinuation was defined by either the absence of prescription coverage for the initial therapy for the remainder of the 52-week follow-up period or a switch to an alternative antimuscarinic during this time-period<br><br>Variables: index drug                                                                                                                                                                                                                     | 1 year              |
| Sicras-Mainar et al (2013) <sup>e,23</sup><br>Primary care medical databases; Spain (2008–2010)                        | n=1971<br>Male: n=821 (41.7%)<br>Female: n=1150 (58.3%)<br>Mean (SD) age: 70.1 (10.6) years                                                                          | Adults aged ≥18 years with a first index (new) prescription of:<br>fesoterodine (n=302)<br>solifenacin (n=952)<br>tolterodine (n=717)  | Persistence was defined as patients who remained on treatment during the 52-week period following the index date<br><br>Compliance was defined according to ISPOR criteria and was calculated based on the MPR                                                                                                                                                                                                                                                             | 1 year              |
| Suehs et al (2016) <sup>24</sup><br>Medicare Advantage Prescription Plan - Administrative Claims Data; USA (2007–2013) | n=46 140 <sup>a</sup><br>Male: n=15 479 <sup>a</sup> (33.5%) <sup>a</sup><br>Female: n=30 661 <sup>a</sup> (66.5%) <sup>a</sup><br>Mean age: 75.5 years <sup>a</sup> | Adults aged 65 to 89 years <sup>f</sup> with a first index (new) prescription of any antimuscarinic OAB medication                     | Persistence was assessed as time in days from the index date to discontinuation of index antimuscarinic treatment<br><br>Adherence was assessed as PDC with the index OAB treatment over three predefined post index observation periods: 3, 6, and 12 months<br><br>Treatment discontinuation was identified using a permissible gap between refills of 15 days                                                                                                           | 1 year              |

| Author (year) and country (database)                                                                                           | Participants                                                                                                                                                                       | Drug/intervention*                                                                                                                                                                                                     | Definition of persistence/adherence/discontinuation and independent variables on persistence                                                                                                                                                                                                                                                                                                                                                         | Length of follow-up |
|--------------------------------------------------------------------------------------------------------------------------------|------------------------------------------------------------------------------------------------------------------------------------------------------------------------------------|------------------------------------------------------------------------------------------------------------------------------------------------------------------------------------------------------------------------|------------------------------------------------------------------------------------------------------------------------------------------------------------------------------------------------------------------------------------------------------------------------------------------------------------------------------------------------------------------------------------------------------------------------------------------------------|---------------------|
| Sussman et al (2017) <sup>25</sup><br>Truven MarketScan®<br>Claims Database; USA<br>(2012–2013)                                | n=71 980 <sup>a</sup><br>Male: n=21 225 <sup>a</sup> (29.5%) <sup>a</sup><br>Female: n=50 755 <sup>a</sup> (70.5%) <sup>a</sup><br>Mean age: 62.3 years <sup>a</sup>               | Adults aged ≥18 years with a prescription of:<br>mirabegron<br>any anticholinergic OAB medication                                                                                                                      | Persistence was measured by evaluating treatment failure (defined as either treatment discontinuation or treatment switching). A medication supply gap of ≥30 days was used to define treatment discontinuation<br><br>Adherence was defined as the PDC (ie, the number of days covered by the index therapy divided by the number of days between the index date and the end of the follow-up [365 days]). A PDC of <80% was considered nonadherent | 1 year              |
| Wagg et al (2012) <sup>26</sup><br>Prescription Database;<br>UK (2007–2008)                                                    | n=4833<br>Demographics were not explicitly reported, the majority of prescriptions appeared to be issued to patients aged ≥60 years                                                | Adults aged ≥40 years with a first index (new) prescription of:<br>darifenacin<br>flavoxate<br>oxybutynin ER<br>oxybutynin IR<br>propiverine<br>solifenacin<br>tolterodine ER<br>tolterodine IR<br>trospium            | Persistence was defined as the mean time [in days] until discontinuation (a gap in treatment exceeding 1.5 times than the length of the previous prescription without a refill)                                                                                                                                                                                                                                                                      | 1 year              |
| Wagg et al (2015) <sup>27</sup><br>Canadian National<br>Private Drug Plan<br>Database; Canada<br>(2013)                        | n=19 485<br>Male: n=4992 (25.6%) <sup>a</sup><br>Female: n=14 493 (74.3%) <sup>a</sup><br>Mean age not reported; the majority of patients (77.8%) <sup>a</sup> were aged ≥46 years | Adults aged ≥18 years with a first index (new) prescription of:<br>mirabegron (n=1683)<br>fesoterodine (n=1415)<br>oxybutynin ER (n=1260)<br>oxybutynin IR (n=5356)<br>solifenacin (n=6032)<br>tolterodine ER (n=3739) | Adherence was defined by the MPR over 1 year<br><br>To calculate time to end of persistence (defined by a gap in therapy of ≥30 days or switching to another medication), prescription claims for a target drug were tracked for 12 months after the index claim date<br><br>Variables: age, gender, treatment-naïve vs treatment-experienced, index antimuscarinic, number of coexisting medications                                                | 1 year              |
| Wagg et al (2015) <sup>28</sup><br>IMS Brogan public and<br>private prescription<br>claims databases;<br>Canada<br>(2007–2012) | n=31 707<br>Male: n=9395 (29.6%) <sup>a</sup><br>Female: n=22 312 (70.4%) <sup>a</sup><br>Mean age not reported                                                                    | Adult patients receiving a first index (new) prescription of:<br>oxybutynin IR<br>oxybutynin ER<br>tolterodine IR<br>tolterodine ER<br>solifenacin<br>darifenacin<br>trospium<br>flavoxate                             | Discontinuation was defined as patients experiencing a gap in therapy longer than 60 days                                                                                                                                                                                                                                                                                                                                                            | 4 years             |

| Author (year) and country (database)                                                                  | Participants                                                                                  | Drug/intervention*                                                                                                                                                                  | Definition of persistence/adherence/discontinuation and independent variables on persistence                                                                                                                                                                                                                                                                                                                                                                                                                                                                                                                                                                                                    | Length of follow-up |
|-------------------------------------------------------------------------------------------------------|-----------------------------------------------------------------------------------------------|-------------------------------------------------------------------------------------------------------------------------------------------------------------------------------------|-------------------------------------------------------------------------------------------------------------------------------------------------------------------------------------------------------------------------------------------------------------------------------------------------------------------------------------------------------------------------------------------------------------------------------------------------------------------------------------------------------------------------------------------------------------------------------------------------------------------------------------------------------------------------------------------------|---------------------|
| Yeaw et al (2009) <sup>29</sup><br>PharMetrics Patient-Centric Database (pharmacy claims); USA (2005) | n=7722<br>Male: n=1686 (21.8%)<br>Female: n=6036 (78.2%)<br>Mean (SD) age: 43.7 (18.3) years  | Adult patients receiving a first index (new) prescription of:<br>tolterodine<br>oxybutynin<br>solifenacin<br>darifenacin<br>trospium<br>bethanechol<br>flavoxate<br>hyoscyamine     | Persistence was calculated for the post-index period until the patient discontinued therapy, was lost to follow-up due to disenrollment from the health plan (minimum of 12 months), or the maximum 24-month follow-up period ended, whichever event occurred first. A patient was considered persistent until an excessive gap in days supplied occurred; refill gaps of 30, 60, and 90 days were used to calculate persistence for all cohorts<br><br>Adherence was measured using the PDC for each of the six drug class cohorts. This was calculated by taking patients' total days supplied of index class medications for the 360-day period following the index date and dividing by 360 | 2 years             |
| Yu et al (2015) <sup>30</sup><br>California Medi-Cal administrative files; USA (1999–2002)            | n=2496<br>Male: n=534 (21.4%)<br>Female: n=1962 (78.6%)<br>Mean (SD) age: 63.15 (16.14) years | Adult patients aged ≥18 years receiving a prescription of an OAB drug, including:<br>tolterodine (n=1093)<br>oxybutynin ER (n=524)<br>oxybutynin (n=812)<br>other OAB agents (n=67) | Persistence was measured by the length of continuous pharmacological treatment (patients discontinued their treatment if they failed to refill OAB/UI agents within 30 days after the expected end date of the previous prescription)<br><br>Patients who switched from one agent of OAB/UI drug to another within 30 days were considered persistent on therapy.<br><br>Adherence was defined as MPR over 181 days for the 6-month follow-up period<br><br>Variables: age, gender, ethnicity, index drug, OAB-associated comorbidities (UTIs), medication use history, length of hospital stay and number of drug classes prescribed                                                           | 1 year              |

COPD = chronic obstructive pulmonary disease; ER = extended release; ISPOR = International Society for Pharmacoeconomics and Outcomes Research; IR = immediate release; MPR = medication possession ratio (measured as the proportion of days with any OAB medication on hand, over the length of the evaluation period); OAB = overactive bladder; PDC = proportion of days covered; PIM = potentially inappropriate medication; SD = standard deviation; TD = transdermal; UA = urinary antispasmodic; UI = urinary incontinence; UTIs = urinary tract infections

\*The sum of the patients prescribed individual drugs may not match the total number of patients perhaps due to switching in some studies

<sup>a</sup>Calculated from data presented in the article; <sup>b</sup>used only in an OAB context; <sup>c</sup>26 922 continued, discontinued or restarted an OAB medication in the study period, but no demographics for this specific sub-group are reported; <sup>d</sup>Sicras-Mainar et al (2016)<sup>19</sup> and Sicras-Mainar et al (2015)<sup>20</sup> relate to the same patient group in terms of demographics and the timeframe/geographical source of adherence/persistence data; <sup>e</sup>Sicras-Mainar et al (2014)<sup>22</sup> and Sicras-Mainar et al (2013)<sup>23</sup> relate to the same patient group in terms of demographics and the timeframe/geographical source of adherence/persistence data; <sup>f</sup>this cohort was split into two groups – patients who were assigned OAB medication appropriately [non-PIM], or potentially inappropriately [PIM]. Inappropriateness was defined as patients having “drug–disease or syndrome interaction or indication of significant anticholinergic medication burden at the time of initiation of an antimuscarinic OAB treatment”

## References

1. Brostrom S, Hallas J: Persistence of antimuscarinic drug use. *Eur J Clin Pharmacol* 2009; **65**: 309.
2. Chancellor MB, Yehoshua A, Waweru C et al: Limitations of anticholinergic cycling in patients with overactive bladder (OAB) with urinary incontinence (UI): results from the CONsequences of Treatment Refractory Overactive bLadder (CONTROL) study. *Int Urol Nephrol* 2016; **48**: 1029.
3. Chapple CR, Nazir J, Hakimi Z et al: Persistence and adherence with mirabegron versus antimuscarinic agents in patients with overactive bladder: a retrospective observational study in UK clinical practice. *Eur Urol* 2017; **72**: 389.
4. D'Souza AO, Smith MJ, Miller LA et al: Persistence, adherence, and switch rates among extended-release and immediate-release overactive bladder medications in a regional managed care plan. *J Manag Care Pharm* 2008; **14**: 291.
5. Desgagne A, LeLorier J: Incontinence drug utilization patterns in Quebec, Canada. *Value Health* 1999; **2**: 452.
6. Gomes T, Juurlink DN, Mamdani MM: Comparative adherence to oxybutynin or tolterodine among older patients. *Eur J Clin Pharmacol* 2012; **68**: 97.
7. Gopal M, Haynes K, Bellamy SL et al: Discontinuation rates of anticholinergic medications used for the treatment of lower urinary tract symptoms. *Obstet Gynecol* 2008; **112**: 1311.
8. Ivanova JI, Hayes-Larson E, Sorg RA et al: Healthcare resource use and costs of privately insured patients who switch, discontinue, or persist on anti-muscarinic therapy for overactive bladder. *J Med Econ* 2014; **17**: 741.
9. Johnston S, Janning SW, Haas GP et al: Comparative persistence and adherence to overactive bladder medications in patients with and without diabetes. *Int J Clin Pract* 2012; **66**: 1042.
10. Kalder M, Pantazis K, Dinas K et al: Discontinuation of treatment using anticholinergic medications in patients with urinary incontinence. *Obstet Gynecol* 2014; **124**: 794.
11. Kleinman NL, Odell K, Chen CI et al: Persistence and adherence with urinary antispasmodic medications among employees and the impact of adherence on costs and absenteeism. *J Manag Care Spec Pharm* 2014; **20**: 1047.
12. Krhut J, Gartner M, Petzel M et al: Persistence with first line anticholinergic medication in treatment-naive overactive bladder patients. *Scand J Urol* 2014; **48**: 79.
13. Manack A, Motsko SP, Haag-Molkenteller C et al: Epidemiology and healthcare utilization of neurogenic bladder patients in a US claims database. *Neurourol Urodyn* 2011; **30**: 395.
14. Mauseth SA, Skurtveit S, Spigset O: Adherence, persistence and switch rates for anticholinergic drugs used for overactive bladder in women: data from the Norwegian Prescription Database. *Acta Obstet Gynecol Scand* 2013; **92**: 1208.
15. Nitti VM, Rovner ES, Franks B et al: Persistence with mirabegron versus tolterodine in patients with overactive bladder. *Am J Pharm Benefits* 2016; **8**: e25.
16. Pelletier EM, Vats V, Clemens JQ: Pharmacotherapy adherence and costs versus nonpharmacologic management in overactive bladder. *Am J Manag Care* 2009; **15**: S108.
17. Perfetto EM, Subedi P, Jumadilova Z: Treatment of overactive bladder: a model comparing extended-release formulations of tolterodine and oxybutynin. *Am J Manag Care* 2005; **11**: S150.
18. Sears CL, Lewis C, Noel K et al: Overactive bladder medication adherence when medication is free to patients. *J Urol* 2010; **183**: 1077.

19. Sicras-Mainar A, Navarro-Artieda R, Ruiz-Torrejon A et al: Persistence and concomitant medication in patients with overactive bladder treated with antimuscarinic agents in primary care. An observational baseline study. *Actas Urol Esp* 2016; **40**: 96.
20. Sicras-Mainar A, Navarro-Artieda R, Ruiz-Torrejon A et al: Impact of loss of work productivity in patients with overactive bladder treated with antimuscarinics in Spain: study in routine clinical practice conditions. *Clin Drug Investig* 2015; **35**: 795.
21. Sicras-Mainar A, Rejas-Gutierrez J, Navarro-Artieda R et al: Use of health care resources and associated costs in non-institutionalized vulnerable elders with overactive bladder treated with antimuscarinic agents in the usual medical practice. *Actas Urol Esp* 2014; **38**: 530.
22. Sicras-Mainar A, Rejas J, Navarro-Artieda R et al: Antimuscarinic persistence patterns in newly treated patients with overactive bladder: a retrospective comparative analysis. *Int Urogynecol J* 2014; **25**: 485.
23. Sicras-Mainar A, Rejas J, Navarro-Artieda R et al: Health economics perspective of fesoterodine, tolterodine or solifenacin as first-time therapy for overactive bladder syndrome in the primary care setting in Spain. *BMC Urol* 2013; **13**: 51.
24. Suehs BT, Davis C, Franks B et al: Effect of potentially inappropriate use of antimuscarinic medications on healthcare use and cost in individuals with overactive bladder. *J Am Geriatr Soc* 2016; **64**: 779.
25. Sussman D, Yehoshua A, Kowalski J et al: Adherence and persistence of mirabegron and anticholinergic therapies in patients with overactive bladder: a real-world claims data analysis. *Int J Clin Pract* 2017; **71**: e12824.
26. Wagg A, Compion G, Fahey A et al: Persistence with prescribed antimuscarinic therapy for overactive bladder: a UK experience. *BJU Int* 2012; **110**: 1767.
27. Wagg A, Franks B, Ramos B et al: Persistence and adherence with the new beta-3 receptor agonist, mirabegron, versus antimuscarinics in overactive bladder: early experience in Canada. *Can Urol Assoc J* 2015; **9**: 343.
28. Wagg A, Diles D, Berner T: Treatment patterns for patients on overactive bladder therapy: a retrospective statistical analysis using Canadian claims data. *JHEOR* 2015; **3**: 43.
29. Yeaw J, Benner JS, Walt JG et al: Comparing adherence and persistence across 6 chronic medication classes. *J Manag Care Pharm* 2009; **15**: 728.
30. Yu YF, Nichol MB, Yu AP et al: Persistence and adherence of medications for chronic overactive bladder/urinary incontinence in the California Medicaid program. *Value Health* 2005; **8**: 495.



**Supplemental Table 2.** Summary of adherence and persistence rates and determinants

| Author (year)                           | Persistence*                                                                                                                                                                                                                                                                                                                                                                                                                                                                          | Adherence*                                                                                                                                                                                                                                                                   | Determinants of persistence and adherence                                                                                                                                                                                |
|-----------------------------------------|---------------------------------------------------------------------------------------------------------------------------------------------------------------------------------------------------------------------------------------------------------------------------------------------------------------------------------------------------------------------------------------------------------------------------------------------------------------------------------------|------------------------------------------------------------------------------------------------------------------------------------------------------------------------------------------------------------------------------------------------------------------------------|--------------------------------------------------------------------------------------------------------------------------------------------------------------------------------------------------------------------------|
| Brostrøm and Hallas (2009) <sup>1</sup> | Proportion of patients continued (all drugs except trospium chloride):<br><50% at 6 months<br><25% at 1 year<br><10% at ≥2 years<br><br>Proportion of patients continued trospium:<br>46% at 6 months<br>36% at 1 year<br>22% at 2 years<br>16% at 3 years                                                                                                                                                                                                                            | Not reported                                                                                                                                                                                                                                                                 | <b>Gender, age, medication dose, treatment status, medication type</b><br>Retention was longer: in females; in older people; with higher doses; with previous experience of other OAB drugs; trospium vs other OAB drugs |
| Chancellor et al (2013) <sup>2</sup>    | Proportion of patients discontinued at 2 years: <sup>a</sup><br>tolterodine ER: 84.7%<br>solifenacin: 85.2%<br>oxybutynin: 91.1%<br>darifenacin: 85.7%<br>oxybutynin ER: 84.0%<br>tolterodine: 85.1%<br>trospium: 88.1%<br>trospium ER: 87.1%<br><br>Proportion of patient switched at 2 years: <sup>a</sup><br>tolterodine ER: 5.7%<br>solifenacin: 5.2%<br>oxybutynin: 4.7%<br>darifenacin: 6.0%<br>oxybutynin ER: 6.7%<br>tolterodine: 9.7%<br>trospium: 6.9%<br>trospium ER: 6.4% | Proportion of patients with MPR ≥0.80 over study period (in those filling >1 prescription):<br>tolterodine ER: 51.1%<br>solifenacin: 49.4%<br>oxybutynin: 30.1%<br>darifenacin: 51.9%<br>oxybutynin ER: 51.8%<br>tolterodine: 42.6%<br>trospium: 42.4%<br>trospium ER: 54.3% | Not reported                                                                                                                                                                                                             |

| Author (year)                     | Persistence*                                                                                                                                                                                                                                                                                                                                                                                                                                                                                                             | Adherence*                                                                                                                                                                                                                                                                                                                                                                                                                                                                                                                                                                                            | Determinants of persistence and adherence                                                                                                                                                                                                                                                                                                                                                                                                                                                                                       |
|-----------------------------------|--------------------------------------------------------------------------------------------------------------------------------------------------------------------------------------------------------------------------------------------------------------------------------------------------------------------------------------------------------------------------------------------------------------------------------------------------------------------------------------------------------------------------|-------------------------------------------------------------------------------------------------------------------------------------------------------------------------------------------------------------------------------------------------------------------------------------------------------------------------------------------------------------------------------------------------------------------------------------------------------------------------------------------------------------------------------------------------------------------------------------------------------|---------------------------------------------------------------------------------------------------------------------------------------------------------------------------------------------------------------------------------------------------------------------------------------------------------------------------------------------------------------------------------------------------------------------------------------------------------------------------------------------------------------------------------|
| Chapple et al (2017) <sup>3</sup> | Median time to discontinuation (days):<br>mirabegron: 169<br>darifenacin: 56<br>fesoterodine: 78<br>flavoxate: 30<br>oxybutynin ER: 60<br>oxybutynin IR: 35<br>propiverine: 56<br>solifenacin: 67<br>tolterodine ER: 56<br>trospium chloride: 60<br><br>Proportion of patients persistent at 1 year:<br>mirabegron: 38%<br>darifenacin: 16%<br>fesoterodine: 24%<br>flavoxate: 8.3%<br>oxybutynin ER: 17%<br>oxybutynin IR: 12%<br>propiverine: 21%<br>solifenacin: 25%<br>tolterodine ER: 21%<br>trospium chloride: 19% | Mean (SD) MPR at 1 year:<br>mirabegron: 0.59 (0.33)<br>darifenacin: 0.46 (0.34)<br>fesoterodine: 0.53 (0.33)<br>flavoxate: 0.44 (0.32)<br>oxybutynin ER: 0.49 (0.32)<br>oxybutynin IR: 0.41 (0.32)<br>propiverine: 0.51 (0.32)<br>solifenacin: 0.53 (0.34)<br>tolterodine ER: 0.50 (0.34)<br>trospium chloride: 0.48 (0.33)<br><br>Proportion of patients with MPR ≥0.8 at 1 year:<br>mirabegron: 43%<br>darifenacin: 29%<br>fesoterodine: 35%<br>flavoxate: 24%<br>oxybutynin ER: 31%<br>oxybutynin IR: 22%<br>propiverine: 25%<br>solifenacin: 35%<br>tolterodine ER: 32%<br>trospium chloride: 29% | <b>Medication type</b><br>Mirabegron was associated with a statistically significantly greater median time to discontinuation (adjusted HR range 1.31–2.31; p<0.0001 all comparisons) and 12-month persistence rates (adjusted OR range 0.18–0.71; p≤0.0001 all comparisons) vs antimuscarinics in all patients<br><br>The mean MPR with mirabegron was significantly greater vs antimuscarinics in all patients (p values 0.03 to <0.0001), and in treatment-naïve subcohorts, except for flavoxate (p values 0.02 to <0.0001) |

1  
2  
3  
4  
5  
6  
7  
8  
9  
10  
11  
12  
13  
14  
15  
16  
17  
18  
19  
20  
21  
22  
23  
24  
25  
26  
27  
28  
29  
30  
31  
32  
33  
34  
35  
36  
37  
38  
39  
40  
41  
42  
43  
44  
45  
46

| Author (year)                      | Persistence*                                                                                                                                                                                                                                                                                                                                                                                                                                                                                                                                                                                                                                      | Adherence*   | Determinants of persistence and adherence                                                                                                                                                                                                                                                                                                                                                                                                                                                                                                                                                                                                                  |
|------------------------------------|---------------------------------------------------------------------------------------------------------------------------------------------------------------------------------------------------------------------------------------------------------------------------------------------------------------------------------------------------------------------------------------------------------------------------------------------------------------------------------------------------------------------------------------------------------------------------------------------------------------------------------------------------|--------------|------------------------------------------------------------------------------------------------------------------------------------------------------------------------------------------------------------------------------------------------------------------------------------------------------------------------------------------------------------------------------------------------------------------------------------------------------------------------------------------------------------------------------------------------------------------------------------------------------------------------------------------------------------|
| Desgagné et al (1999) <sup>4</sup> | Proportion of patients refilled initial prescription:<br>Short-term <sup>b</sup> ;<br>oxybutynin: 39.3%<br>flavoxate: 36.6%<br><br>Long-term <sup>c</sup> ;<br>oxybutynin: 63.9%<br>flavoxate: 55.5%<br><br>Proportion of patients discontinued at 3 months:<br>oxybutynin: 78%<br>flavoxate: 83%<br><br>Proportion of patients discontinued at 6-months:<br>oxybutynin: 89%<br>flavoxate: 94%<br><br>Proportion of patients switched at 4-years:<br><br>Patients without renewal of the original claim:<br>oxybutynin: 1.3%<br>flavoxate: 3.1%<br><br>Patients with any number of renewals before switch:<br>oxybutynin: 2.2%<br>flavoxate: 5.9% | Not reported | <b>Age</b><br>Compared with patients aged <77.5 years, those who were older were less likely to discontinue vs:<br>77.5–83.5 years: RR 0.90, 95% CI 0.85–0.96, p<0.001<br>>83.5 years: RR 0.86, 95% CI 0.81–0.92, p<0.001<br><br><b>Medication dose</b><br>Higher quantity of tablets per day (2–4 tablets/day) was associated with increased risk of early discontinuation, compared with low daily quantity (1 tablet per day) (RR 1.45, 95% CI 1.37–1.53, p<0.001)<br><br><b>Medication type</b><br>Patients receiving flavoxate had an increased risk of discontinuation compared with those receiving oxybutynin (RR 1.13, 95% CI 1.05–1.22, p<0.001) |

| Author (year)                     | Persistence*                                                                                                                                                                                                                                                                                                                                                                                                                                                                                                                                                                                                                                                                                                                                                                               | Adherence*                                                                                                                                                                                                       | Determinants of persistence and adherence                                                                                                                                                                                                                                                                                                              |
|-----------------------------------|--------------------------------------------------------------------------------------------------------------------------------------------------------------------------------------------------------------------------------------------------------------------------------------------------------------------------------------------------------------------------------------------------------------------------------------------------------------------------------------------------------------------------------------------------------------------------------------------------------------------------------------------------------------------------------------------------------------------------------------------------------------------------------------------|------------------------------------------------------------------------------------------------------------------------------------------------------------------------------------------------------------------|--------------------------------------------------------------------------------------------------------------------------------------------------------------------------------------------------------------------------------------------------------------------------------------------------------------------------------------------------------|
| D'Souza et al (2008) <sup>5</sup> | <p>Proportion of patients persistent at 1 year (without a gap &gt;45 days):</p> <p>oxybutynin ER: 15.3%</p> <p>oxybutynin IR: 6.5%</p> <p>tolterodine ER: 15.0%</p> <p>tolterodine IR: 11.4%</p> <p>overall: 13.2%</p> <p>Proportion of patients not refilled index medication:</p> <p>oxybutynin ER: 39.4%</p> <p>oxybutynin IR: 59.3%</p> <p>tolterodine ER: 42.7%</p> <p>tolterodine IR: 46.1%</p> <p>overall: 44.5%</p> <p>Median time to discontinuation (days):</p> <p>oxybutynin ER: 34</p> <p>oxybutynin IR: 0</p> <p>tolterodine IR: 32</p> <p>tolterodine ER: 33</p> <p>overall: 31</p> <p>Proportion of patients switched at 1 year:</p> <p>oxybutynin ER: 16.5%</p> <p>oxybutynin IR: 19.4%</p> <p>tolterodine IR: 13.7%</p> <p>tolterodine ER: 9.9%</p> <p>overall: 13.3%</p> | <p>Proportion of patients with MPR <math>\geq 0.80</math> at 1 year:</p> <p>oxybutynin ER: 36.1%</p> <p>oxybutynin IR: 14.8%</p> <p>tolterodine ER: 35.2%</p> <p>tolterodine IR: 23.5%</p> <p>overall: 30.3%</p> | <p><b>Medication formulation</b></p> <p>Adherence with IR drugs approximately half that for ER drugs (OR 0.504, 95% CI 0.306–0.704, <math>p &lt; 0.001</math>)</p> <p><b>Age</b></p> <p>Patients aged <math>\geq 65</math> years were 1.5 times more likely to achieve an MPR <math>\geq 0.80</math> than patients aged <math>&lt; 65</math> years</p> |

1  
2  
3  
4  
5  
6  
7  
8  
9  
10  
11  
12  
13  
14  
15  
16  
17  
18  
19  
20  
21  
22  
23  
24  
25  
26  
27  
28  
29  
30  
31  
32  
33  
34  
35  
36  
37  
38  
39  
40  
41  
42  
43  
44  
45  
46

| Author (year)                   | Persistence*                                                                                                                                                                                                                                                                                                                                                    | Adherence*   | Determinants of persistence and adherence                                                                                               |
|---------------------------------|-----------------------------------------------------------------------------------------------------------------------------------------------------------------------------------------------------------------------------------------------------------------------------------------------------------------------------------------------------------------|--------------|-----------------------------------------------------------------------------------------------------------------------------------------|
| Gomes et al (2012) <sup>6</sup> | Median time to discontinuation (days):<br>oxybutynin: 68<br>tolterodine: 128<br><br>Proportion of patients persistent at:<br>6 months<br>oxybutynin: 30.6%<br>tolterodine: 42.9%<br><br>1 year<br>oxybutynin: 18.9%<br>tolterodine: 27.3%<br><br>18 months<br>oxybutynin: 13.1%<br>tolterodine: 18.9%<br><br>2 years:<br>oxybutynin: 9.4%<br>tolterodine: 13.6% | Not reported | <b>Medication type</b><br>Over the 2-year follow-up, the time to discontinuation was longer with tolterodine than oxybutynin (p<0.0001) |

For peer review only

| Author (year)                   | Persistence*                                                                                                                                                                                                                                                                                                                                                                                                                                                                                                                                                                                                                                                                                                                                                                                                                                                                                                                                                                                                                                                                                                                                                                                                                       | Adherence*   | Determinants of persistence and adherence                                                                                                                                                                                                                                                                                                                                                                                                                                                                                                                                                                                                                                         |
|---------------------------------|------------------------------------------------------------------------------------------------------------------------------------------------------------------------------------------------------------------------------------------------------------------------------------------------------------------------------------------------------------------------------------------------------------------------------------------------------------------------------------------------------------------------------------------------------------------------------------------------------------------------------------------------------------------------------------------------------------------------------------------------------------------------------------------------------------------------------------------------------------------------------------------------------------------------------------------------------------------------------------------------------------------------------------------------------------------------------------------------------------------------------------------------------------------------------------------------------------------------------------|--------------|-----------------------------------------------------------------------------------------------------------------------------------------------------------------------------------------------------------------------------------------------------------------------------------------------------------------------------------------------------------------------------------------------------------------------------------------------------------------------------------------------------------------------------------------------------------------------------------------------------------------------------------------------------------------------------------|
| Gopal et al (2008) <sup>7</sup> | <p data-bbox="376 252 904 304">Over 3 years, 91% of 49,419 episodes of medication prescription resulted in discontinuation</p> <p data-bbox="376 331 904 411">Cumulative incidence of discontinuation at 6 months, 1 year, 2 years and 3 years (unadjusted):<br/>Overall: 58.8, 77.2, 87.5, 92.0%</p> <p data-bbox="376 438 904 778">Cumulative incidence of discontinuation, at 6 months, 1 year, 2 years and 3 years (adjusted for age, year of initiation, switch, number of previous drug classes, number of prior episodes and smoking status):<br/>oxybutynin: 71, 86, 94, 96%<br/>oxybutynin ER: 57, 80, 93, 97%<br/>tolterodine: 61, 81, 92, 95%<br/>tolterodine ER: 54, 76, 91, 97%<br/>trospium: 56, 80, 94, 98%<br/>propiverine: 61, 84, 95, 98%<br/>solifenacin: 53, 91, 98, 99%<br/>terodiline: 89, 99%, N/A, N/A<br/>flavoxate: 85, 96, 99, 99%</p> <p data-bbox="376 805 904 1098">Median time to discontinuation (months):<br/>oxybutynin: 4.67<br/>oxybutynin ER: 5.13<br/>tolterodine: 5.47<br/>tolterodine ER: 5.37<br/>trospium: 5.47<br/>propiverine: 5.43<br/>solifenacin: 5.00<br/>terodiline: 4.00<br/>flavoxate: 4.00<br/>overall: 4.76</p> <p data-bbox="376 1125 904 1147">Overall switch rate: 15%</p> | Not reported | <p data-bbox="1330 252 1998 274"><b>Medication formulation</b></p> <p data-bbox="1330 279 1998 359">In comparison with the multiple-dosing drug classes at 6 months, both oxybutynin ER (57%, 95% CI 55.1–59.2) and tolterodine ER (54%, 95% CI 52.3–57.4) had lower incidences of discontinuation</p> <p data-bbox="1330 386 1998 408"><b>Medication type</b></p> <p data-bbox="1330 413 1998 544">Trospium and tolterodine were associated with the longest median time to discontinuation (5.47 months each), followed by propiverine (5.43 months) and solifenacin (5.0 months). Terodiline and flavoxate had the shortest median time to discontinuation (4 months each)</p> |

| Author (year)                     | Persistence*                                                                                                                                                                                                                                                                                                                                                                                                                                                    | Adherence*   | Determinants of persistence and adherence                                                                                                                                                                                                                                                                                                                                                                                                                                                                                                                                                                                                                                                                                                                                                                                                                                                                                                                                                                                                                                                                                                                                                                                                                                                                                                                                                                                                                            |
|-----------------------------------|-----------------------------------------------------------------------------------------------------------------------------------------------------------------------------------------------------------------------------------------------------------------------------------------------------------------------------------------------------------------------------------------------------------------------------------------------------------------|--------------|----------------------------------------------------------------------------------------------------------------------------------------------------------------------------------------------------------------------------------------------------------------------------------------------------------------------------------------------------------------------------------------------------------------------------------------------------------------------------------------------------------------------------------------------------------------------------------------------------------------------------------------------------------------------------------------------------------------------------------------------------------------------------------------------------------------------------------------------------------------------------------------------------------------------------------------------------------------------------------------------------------------------------------------------------------------------------------------------------------------------------------------------------------------------------------------------------------------------------------------------------------------------------------------------------------------------------------------------------------------------------------------------------------------------------------------------------------------------|
| Ivanova et al (2014) <sup>8</sup> | Proportion of patients discontinued at 6 months: 61.0%<br>Proportion of patients switched at 6 months: 8.0%<br>Proportion of patients persistent at 6 months: 31.0%<br>Proportion of patients discontinued at 6 months:<br>oxybutynin: 30.6%<br>tolterodine: 30.5%<br>solifenacin: 24.5%<br>darifenacin: 8.4%<br>trospium: 4.1%<br>fesoterodine: 1.9%<br>Mean time to discontinuation: 54.7 days<br>42.7% of patients never refilled their indexed prescription | Not reported | <p><b>Age</b><br/>           Patients who discontinued (50.5 years) or switched (52.6 years) medication were significantly younger than those who persisted (53.4 years; p&lt;0.001)</p> <p>Increasing age was associated with reduced odds of discontinuation (adjusted OR 0.97, 95% CI 0.96–0.97, p&lt;0.0001)</p> <p><b>Gender</b><br/>           Being male was associated with greater odds of discontinuation (adjusted OR 1.11, 95% CI 1.00–1.23, p=0.0475)</p> <p><b>Medication type</b><br/>           Patients who persisted with medication contained a significantly higher proportion of solifenacin users than those in groups who switched or discontinued (30.1% vs 19.7% vs 24.5%, respectively, p&lt;0.001) and a lower proportion of oxybutynin (22.6% vs 29.6% vs 30.6%, respectively, p&lt;0.001)</p> <p>Compared to patients treated with solifenacin, patients were significantly more likely to discontinue when treated with tolterodine (adjusted OR 1.30, 95% CI 1.16–1.45, p&lt;0.0001) or oxybutynin (adjusted OR 1.80, 95% CI 1.59–2.03, p&lt;0.0001)</p> <p><b>Presence of infection</b><br/>           Patients with UTI were more likely to discontinue compared with those without UTI (adjusted OR 1.31, 95% CI 1.19–1.45, p&lt;0.0001)</p> <p><b>Financial burden</b><br/>           Patients with lower log of baseline OAB-related costs were more likely to discontinue (adjusted OR 0.96, 95% CI 0.94–0.98, p&lt;0.0001)</p> |

| Author (year)                      | Persistence*                                                                                                                                                                                                                                                                                                             | Adherence*                                                                                                                          | Determinants of persistence and adherence                                                                                                                                                                                                                                                                                                                                                                                                                                                                                                                                            |
|------------------------------------|--------------------------------------------------------------------------------------------------------------------------------------------------------------------------------------------------------------------------------------------------------------------------------------------------------------------------|-------------------------------------------------------------------------------------------------------------------------------------|--------------------------------------------------------------------------------------------------------------------------------------------------------------------------------------------------------------------------------------------------------------------------------------------------------------------------------------------------------------------------------------------------------------------------------------------------------------------------------------------------------------------------------------------------------------------------------------|
| Johnston et al (2012) <sup>9</sup> | <p>Mean time of continuation at 1 year (days):<br/>           diabetic: 164<br/>           not diabetic: 146.9<br/>           (p&lt;0.001 difference)</p> <p>Proportion of patients discontinued at 1 year:<br/>           diabetic: 71.5%<br/>           not diabetic: 76.2%<br/>           (p&lt;0.001 difference)</p> | <p>Mean MPR at 1 year;<br/>           diabetic: 0.473<br/>           not diabetic: 0.424<br/>           (p&lt;0.001 difference)</p> | <p><b>Age and gender</b><br/>           The odds of adherence generally increase with age, and females had higher odds of adherence than men</p> <p><b>Diabetes</b><br/>           The diabetes cohort had greater odds of achieving an MPR <math>\geq 0.80</math> (OR 1.215, 95% CI 1.169–1.263, p&lt;0.0001) vs non-diabetes cohort during the 12-month evaluation period</p> <p>The diabetes cohort had greater odds of filling a second OAB medication prescription (OR 1.166, 95% CI 1.127–1.205, p&lt;0.0001) vs non-diabetes cohort during the 12-month evaluation period</p> |

For peer review only



| Author (year)                     | Persistence*                                                                               | Adherence*   | Determinants of persistence and adherence                                                                                                                                                                                                                                                                                                                                                                                                                                                                                                                                                                                                                                                                                                                                                                                                                                                                                                                                                                                                                                                                                                                                                                                                                                                                                                                                                                                                                                                                                                                                                                                                                                            |
|-----------------------------------|--------------------------------------------------------------------------------------------|--------------|--------------------------------------------------------------------------------------------------------------------------------------------------------------------------------------------------------------------------------------------------------------------------------------------------------------------------------------------------------------------------------------------------------------------------------------------------------------------------------------------------------------------------------------------------------------------------------------------------------------------------------------------------------------------------------------------------------------------------------------------------------------------------------------------------------------------------------------------------------------------------------------------------------------------------------------------------------------------------------------------------------------------------------------------------------------------------------------------------------------------------------------------------------------------------------------------------------------------------------------------------------------------------------------------------------------------------------------------------------------------------------------------------------------------------------------------------------------------------------------------------------------------------------------------------------------------------------------------------------------------------------------------------------------------------------------|
| Kalder et al (2014) <sup>10</sup> | Proportion of patients discontinued at:<br>1 year: 74.8%<br>2 years: 77.6%<br>3 years: 87% | Not reported | <p data-bbox="1332 252 1991 355"><b>Gender</b><br/>At 3 years, there was a significantly higher risk of discontinuation in male than female patients (HR 1.14, 95% CI 1.11–1.18, p&lt;0.001)</p> <p data-bbox="1332 384 1991 563"><b>Age</b><br/>Discontinuation was higher in younger patients than older patients:<br/>≤60 years: 89.7%<br/>61–70 years: 87.9%<br/>71–80 years: 86.8%<br/>&gt;80 years: 83.0%</p> <p data-bbox="1332 592 1991 722"><b>Prescriber's profession</b><br/>Discontinuation rate was higher in patients treated by gynecologists and general practitioners compared with urologists (HR 1.60 [95% CI 1.52–1.67] p&lt;0.001; HR 1.24 [95% CI 1.20–1.29] p&lt;0.001)</p> <p data-bbox="1332 751 1991 906"><b>Side effects</b><br/>A higher risk of discontinuation in patients experiencing side effects:<br/>headache: HR 1.27, 95% CI 1.12–1.43, p=0.002<br/>stomach upset: HR 1.20, 95% CI 1.12–1.27, p&lt;0.001<br/>glaucoma: HR 1.46, 95% CI 1.16–1.84, p&lt;0.001</p> <p data-bbox="1332 935 1991 1066"><b>Medication type</b><br/>Patients using propiverine (HR 0.94, 95% CI 0.88–0.99, p=0.022) or solifenacin (HR 0.93, 95% CI 0.87–0.98, p=0.003) had a significantly lower risk of treatment discontinuation compared with oxybutynin. However, the absolute difference was relatively small</p> <p data-bbox="1332 1094 1991 1193"><b>Comorbidities</b><br/>Diabetes, Parkinson's disease, epilepsy, dementia, and multiple sclerosis was associated with a lowered risk of treatment discontinuation</p> <p data-bbox="1332 1222 1991 1268">A prior diagnosis of migraine was associated with a higher risk of treatment discontinuation</p> |

| Author (year)                       | Persistence*                                                                                                                                                                                                                                                                     | Adherence*                                                                                                                     | Determinants of persistence and adherence                                                                                                                                                                                                                                                                                                                                                                                                                                                                                                                                                                                                                                                                                                                                                   |
|-------------------------------------|----------------------------------------------------------------------------------------------------------------------------------------------------------------------------------------------------------------------------------------------------------------------------------|--------------------------------------------------------------------------------------------------------------------------------|---------------------------------------------------------------------------------------------------------------------------------------------------------------------------------------------------------------------------------------------------------------------------------------------------------------------------------------------------------------------------------------------------------------------------------------------------------------------------------------------------------------------------------------------------------------------------------------------------------------------------------------------------------------------------------------------------------------------------------------------------------------------------------------------|
| Kleinman et al (2014) <sup>11</sup> | Median time until a $\geq$ 30-day medication gap: 64 days<br><br>Proportion of patients persistent:<br>beyond 1 month: 70%<br>at 9 months: 10%<br>at 1 year: 5%                                                                                                                  | Proportion of patients with PDC $\leq$ 10% at 1 year: 45.4%<br><br>Proportion of patients with PDC $\geq$ 80% at 1 year: 12.7% | <b>Gender</b><br>Compared to the group with PDC $\geq$ 80%, the group with PDC $<$ 80% contained a lower proportion of females (69.5% vs 76.3%, $p=0.006$ )<br><br><b>Age</b><br>Compared to those with PDC $\geq$ 80%, patients with PDC $<$ 80% were younger (mean age: 46.18 years vs 49.79 years, $p<0.001$ )<br><br><b>Race</b><br>Compared to the group with a PDC $\geq$ 80%, the group with PDC $<$ 80% contained a lower proportion of White patients (38.6% vs 50.0%, $p<0.001$ ) and higher proportion of Black and Hispanic patients (6.7% vs 3.7%, $p=0.025$ ; 11.6% vs 6.3%, $p=0.002$ )<br><br><b>Medication co-payment</b><br>Compared to the group with a PDC $\geq$ 80%, those with PDC $<$ 80% paid a higher mean medication co-payment (\$20.15 vs \$14.68, $p<0.001$ ) |
| Krhut et al (2014) <sup>12</sup>    | Median (SD) time to discontinuation: 6.53 (3.84) months<br><br>Proportion of patients persistent at:<br>3 months: 59.7%<br>6 months: 39.3%<br>9 months: 33.6%<br>1 year: 27.2%                                                                                                   | Not reported                                                                                                                   | <b>Medication type</b><br>Persistence was significantly higher in patients treated with anticholinergic medication with an ER formulation than in patients treated with IR anticholinergics (ER: 7.10 [SD 3.90] months vs IR: 6.18 [SD 3.75] months, $p=0.023$ )                                                                                                                                                                                                                                                                                                                                                                                                                                                                                                                            |
| Manack et al (2011) <sup>13</sup>   | Mean (SD) duration of therapy: 201.9 (120.9) days<br><br>Proportion of patients that:<br>continued OAB medication $\geq$ 1 year: 28.9%<br>discontinued OAB medication and did not restart <sup>d</sup> : 37.5%<br>discontinued and restarted OAB medication <sup>e</sup> : 33.5% | Not reported                                                                                                                   | Not reported                                                                                                                                                                                                                                                                                                                                                                                                                                                                                                                                                                                                                                                                                                                                                                                |

| Author (year)                        | Persistence*                                                                                                                                                                                                                                                                                                                      | Adherence*                                                                                                                                                                                                                             | Determinants of persistence and adherence                                                                                                                                                                                                                                                                                                                                                                                                                                                                                                                                                                                                                                                                                                                                                       |
|--------------------------------------|-----------------------------------------------------------------------------------------------------------------------------------------------------------------------------------------------------------------------------------------------------------------------------------------------------------------------------------|----------------------------------------------------------------------------------------------------------------------------------------------------------------------------------------------------------------------------------------|-------------------------------------------------------------------------------------------------------------------------------------------------------------------------------------------------------------------------------------------------------------------------------------------------------------------------------------------------------------------------------------------------------------------------------------------------------------------------------------------------------------------------------------------------------------------------------------------------------------------------------------------------------------------------------------------------------------------------------------------------------------------------------------------------|
| Mauseth et al (2013) <sup>14</sup>   | <p>Proportion of patients persistent at 1 year:<br/>tolterodine: 39.0%<br/>solifenacin: 39.4%<br/>darifenacin: 34.3%<br/>fesoterodine: 29.1%<br/>overall: 38.0%</p> <p>Proportion of patients switched at 1 year:<br/>tolterodine: 12.0%<br/>overall: 10.3%</p> <p>Proportion of patients filled only one prescription: 31.9%</p> | <p>Mean MPR at 1 year: 0.62<sup>f</sup></p> <p>Proportion of patients with MPR <math>\geq 0.80^f</math> at 1 year:<br/>tolterodine: 33.7%<br/>solifenacin: 35.7%<br/>darifenacin: 37.0%<br/>fesoterodine: 38.5%<br/>overall: 35.2%</p> | <p><b>Age</b><br/>Persistence was lowest in the age group 18–39 years (20.9%), generally increased with age, and was highest in the age groups 70–79 years (43.5%) and <math>\geq 80</math> years (43.3%)</p> <p><b>Medication type</b><br/>At 1 year, persistence was highest for tolterodine (39.0%) and solifenacin (39.4%), both of which entered the market first. Persistence for darifenacin and fesoterodine, which were launched later, was 34.3% and 29.1%, respectively</p>                                                                                                                                                                                                                                                                                                          |
| Nitti et al (2016) <sup>15</sup>     | <p>Proportion of patients persistent at:<br/>1 month;<br/>mirabegron: 68.4%<br/>tolterodine ER: 47.1%</p> <p>3 months;<br/>mirabegron: 48.7%<br/>tolterodine ER: 28.6%</p> <p>6 months;<br/>mirabegron: 34.7%<br/>tolterodine ER: 18.5%</p> <p>Median persistence (days):<br/>mirabegron: 170<br/>tolterodine ER: 90</p>          | Not reported                                                                                                                                                                                                                           | <p><b>Age</b><br/>Compared with patients aged &lt;65 years, patients aged <math>\geq 65</math> years were less likely to discontinue over 6 months with tolterodine (HR 0.88, 95% CI 0.80–0.96, <math>p=0.0064</math>) and mirabegron (HR 0.68, 95% CI 0.52–0.90, <math>p=0.0068</math>)</p> <p><b>Prior treatment</b><br/>Compared to patients without prior use of OAB medication, patients with prior OAB medication use were less likely to discontinue over 6 months with tolterodine (HR 0.76, 95% CI 0.68–0.85), <math>p&lt;0.0001</math>) and mirabegron (HR 0.68, 95% CI 0.53–0.88, <math>p=0.0025</math>)</p> <p><b>Medication type</b><br/>The risk of discontinuation was lower with mirabegron compared with tolterodine (HR 0.72, 95% CI 0.61–0.85, <math>p&lt;0.0001</math>)</p> |
| Pelletier et al (2009) <sup>16</sup> | Not reported                                                                                                                                                                                                                                                                                                                      | <p>Mean cohort PDC at 1 year: 0.32</p> <p>Proportion of patients with PDC <math>\geq 0.80</math> at 1 year: 14.4%</p>                                                                                                                  | <p><b>Demographics (gender, age, comorbidities)<sup>g</sup></b><br/>Female and older subjects were more likely to adhere. Those with a history of hypertension, diabetes, or multiple sclerosis were more adherent. Subjects with COPD were less adherent</p>                                                                                                                                                                                                                                                                                                                                                                                                                                                                                                                                   |

| Author (year)                       | Persistence*                                                                                                                                                                                                                                                                                                                                                                                                                      | Adherence*                                                                                                                                                                                                                                                                                                                                     | Determinants of persistence and adherence                                                                                                                                                                                                                                                                                                                                                                                                                                                                                                                                                                                                                                                      |
|-------------------------------------|-----------------------------------------------------------------------------------------------------------------------------------------------------------------------------------------------------------------------------------------------------------------------------------------------------------------------------------------------------------------------------------------------------------------------------------|------------------------------------------------------------------------------------------------------------------------------------------------------------------------------------------------------------------------------------------------------------------------------------------------------------------------------------------------|------------------------------------------------------------------------------------------------------------------------------------------------------------------------------------------------------------------------------------------------------------------------------------------------------------------------------------------------------------------------------------------------------------------------------------------------------------------------------------------------------------------------------------------------------------------------------------------------------------------------------------------------------------------------------------------------|
| Perfetto et al (2005) <sup>17</sup> | <p>Cumulative discontinuation rates at:</p> <p>1 month;<br/>tolterodine ER: 6%<br/>oxybutynin ER: 11%</p> <p>3 months;<br/>tolterodine ER: 55%<br/>oxybutynin ER: 62%</p> <p>6 months;<br/>tolterodine ER: 69%<br/>oxybutynin ER: 76%</p> <p>11 months;<br/>tolterodine ER: 79%<br/>oxybutynin ER: 85%</p> <p>Overall, at 11 months, 21% of patients remained on tolterodine ER and 15% of patients remained on oxybutynin ER</p> | Not reported                                                                                                                                                                                                                                                                                                                                   | Not reported                                                                                                                                                                                                                                                                                                                                                                                                                                                                                                                                                                                                                                                                                   |
| Sears et al (2010) <sup>18</sup>    | <p>Proportion of patients without prescription refills over 3 years: 35.1%</p> <p>Median persistence (days):<br/>overall: 273<br/>patients with at least 1 refill: 582</p> <p>Overall medication persistence duration was 273 days when all cases were analyzed and 582 days when those with at least 1 refill were analyzed</p>                                                                                                  | <p>Median MPR at 3 years:<br/>oxybutynin 5 mg IR: 0.68<br/>oxybutynin 5 mg ER: 0.83<br/>oxybutynin 10 mg ER: 0.84<br/>tolterodine 1 mg IR: 0.71<br/>tolterodine 2 mg IR: 0.73<br/>tolterodine 2 mg ER: 0.88<br/>tolterodine 4 mg ER: 0.89<br/>overall: 0.82</p> <p>Proportion of patients with MPR <math>\geq</math>0.80 at 3 years: 34.0%</p> | <p><b>Gender</b><br/>Male patients had a higher median MPR than female patients (0.86 vs 0.81, <math>p &lt; 0.001</math>)</p> <p>Medication adherence was higher in males than in females (0.370 vs 0.328, <math>p &lt; 0.001</math>)</p> <p>Of patients refilling their prescription at least once, the median number of days persisted was longer in females than in males (606.0 days vs 547.0 days, <math>p = 0.01</math>)</p> <p><b>Medication type</b><br/>Of patients refilling their prescription at least once, median medication persistence was longest in 5 mg oxybutynin IR (634 days, 95% CI 596.1–671.9) and lowest with 10 mg oxybutynin ER (504 days, 95% CI 137.0–871.0)</p> |

| Author (year)                              | Persistence*                                                                                                                                                                                                                                                                                                                                                          | Adherence*                                                                                                          | Determinants of persistence and adherence                                                                                                                                                                                                                                       |
|--------------------------------------------|-----------------------------------------------------------------------------------------------------------------------------------------------------------------------------------------------------------------------------------------------------------------------------------------------------------------------------------------------------------------------|---------------------------------------------------------------------------------------------------------------------|---------------------------------------------------------------------------------------------------------------------------------------------------------------------------------------------------------------------------------------------------------------------------------|
| Sicras-Mainar et al (2016) <sup>19</sup>   | <p>Proportion of patients persistent (without switching or experiencing a gap of &gt;60 days) at:</p> <p>6 months;<br/>fesoterodine: 71.4%<br/>solifenacin: 67.1%<br/>tolterodine: 64.8%</p> <p>1 year;<br/>fesoterodine: 40.2%<br/>solifenacin: 34.7%<br/>tolterodine: 33.6%</p>                                                                                     | <p>Mean MPR at 1 year was: 0.880, 0.877 or 0.875, depending upon geographical location</p>                          | <p><b>Medication type</b><br/>Persistence at 6 months and 1 year was statistically significantly higher with fesoterodine than solifenacin and tolterodine (p&lt;0.05).</p> <p>Persistence at 1 year was significantly lower with solifenacin than fesoterodine (p&lt;0.01)</p> |
| Sicras-Mainar et al (2015) <sup>1,20</sup> | <p>Proportion of patients persistent at:</p> <p>3 months: 86.2%<br/>6 months: 67.6%<br/>9 months: 48.4%<br/>1 year: 35.9%</p> <p>Mean (SD) treatment duration (without stopping, switching or a gap &gt;30 days):<br/>fesoterodine: 8.1<br/>solifenacin: 7.8<br/>tolterodine: 7.7<br/>overall: 7.9</p>                                                                | <p>Mean MPR at 1 year:<br/>fesoterodine: 0.900<br/>solifenacin: 0.870<br/>tolterodine: 0.861<br/>overall: 0.877</p> | <p>Not reported</p>                                                                                                                                                                                                                                                             |
| Sicras-Mainar et al (2014) <sup>21</sup>   | <p>Proportion of patients persistent (without switching or experiencing a gap of &gt;30 days):</p> <p>3 months;<br/>fesoterodine: 94.8%<br/>solifenacin: 76.2%<br/>tolterodine: 70.8%</p> <p>6 months;<br/>fesoterodine: 70.7%<br/>solifenacin: 59.5%<br/>tolterodine: 57.1%</p> <p>1 year;<br/>fesoterodine: 46.6%<br/>solifenacin: 36.5%<br/>tolterodine: 33.5%</p> | <p>Mean MPR at 1 year:<br/>fesoterodine: 0.907<br/>solifenacin: 0.935<br/>tolterodine: 0.936</p>                    | <p><b>Medication type</b><br/>At 3 months, persistence was higher with fesoterodine than with tolterodine and solifenacin</p>                                                                                                                                                   |

| Author (year)                              | Persistence*                                                                                                                                                                                                                                                                                                                                                                                                                                                            | Adherence*                                                                                                                                                                                                                                                                                                                                                                                                  | Determinants of persistence and adherence                                                                                                                                                                                                                                                                                                                                                                                    |
|--------------------------------------------|-------------------------------------------------------------------------------------------------------------------------------------------------------------------------------------------------------------------------------------------------------------------------------------------------------------------------------------------------------------------------------------------------------------------------------------------------------------------------|-------------------------------------------------------------------------------------------------------------------------------------------------------------------------------------------------------------------------------------------------------------------------------------------------------------------------------------------------------------------------------------------------------------|------------------------------------------------------------------------------------------------------------------------------------------------------------------------------------------------------------------------------------------------------------------------------------------------------------------------------------------------------------------------------------------------------------------------------|
| Sicras-Mainar et al (2014) <sup>9,22</sup> | Proportion of patients persistent at 1 year:<br>fesoterodine: 35.8%<br>solifenacin: 31.9%<br>tolterodine: 30.9%                                                                                                                                                                                                                                                                                                                                                         | Mean MPR at 1 year:<br>fesoterodine: 0.937<br>solifenacin: 0.948<br>tolterodine: 0.935                                                                                                                                                                                                                                                                                                                      | <b>Medication type</b><br>The mean duration of treatment was numerically higher with fesoterodine compared to solifenacin and tolterodine, but no statistical between-medication differences were found. However, adjusted HRs for remaining on treatment at 1 year significantly favored fesoterodine compared with solifenacin (HR 1.24 [95% CI 1.05–1.47]; p=0.011) and tolterodine (HR 1.28 [95% CI 1.07–1.52]; p=0.006) |
| Sicras-Mainar et al (2013) <sup>9,23</sup> |                                                                                                                                                                                                                                                                                                                                                                                                                                                                         | Mean MPR at 1 year:<br>fesoterodine: 0.945<br>solifenacin: 0.954<br>tolterodine: 0.946                                                                                                                                                                                                                                                                                                                      | <b>Medication type</b><br>The mean duration of treatment was numerically higher with fesoterodine compared to solifenacin and tolterodine, but no statistical between-medication differences were found                                                                                                                                                                                                                      |
| Suehs et al (2016) <sup>24</sup>           | Proportion of patients not refilling their index medication:<br>PIM: 41.4%<br>Non-PIM: 47.8%<br>(p<0.01)<br><br>Mean number of days persistent (before discontinuation or experiencing a gap >15 days):<br>PIM: 87.6<br>Non-PIM: 80.9<br>(p<0.001)<br><br>Proportion of patients persistent at:<br>3 months;<br>PIM: 23.9%<br>Non-PIM: 20.3%<br><br>6 months;<br>PIM: 13.2%<br>Non-PIM: 11.4%<br><br>1 year;<br>PIM: 5.1%<br>Non-PIM: 4.5%<br>(all p<0.001 differences) | Mean PDC at:<br>3 months;<br>PIM: 0.62<br>Non-PIM: 0.59<br><br>6 months;<br>PIM: 0.45<br>Non-PIM: 0.42<br><br>1 year;<br>PIM: 0.32<br>Non-PIM: 0.30<br>(all p<0.001 differences)<br><br>Proportion of patients with<br>PDC ≥0.80:<br>3 months;<br>PIM: 37.0%<br>Non-PIM: 35.0%<br><br>6 months;<br>PIM: 23.3%<br>Non-PIM: 19.7%<br><br>1 year;<br>PIM: 12.7%<br>Non-PIM: 10.7%<br>(all p<0.001 differences) | <b>Medication use appropriateness</b><br>At 1 year, there was no statistical difference between PIM status and OAB treatment discontinuation in the multivariable adjusted model based on the primary analysis definition (15-day definition OR 0.977, 95% CI 0.891–1.072, p=0.63; 30-day definition OR 0.939, 95% CI 0.871–1.013, p=0.10)                                                                                   |

| Author (year)                      | Persistence*                                                                                                                                                                                            | Adherence*                                                                                                                                                    | Determinants of persistence and adherence                                                                                                    |
|------------------------------------|---------------------------------------------------------------------------------------------------------------------------------------------------------------------------------------------------------|---------------------------------------------------------------------------------------------------------------------------------------------------------------|----------------------------------------------------------------------------------------------------------------------------------------------|
| Sussman et al (2017) <sup>25</sup> | Proportion of patients discontinued at 1 year (gap of ≥30 days):<br>mirabegron: 67.1%<br>anticholinergic: 84.1%<br><br>Median time to discontinuation (days):<br>mirabegron: 131<br>anticholinergic: 30 | Mean PDC:<br>mirabegron: 0.66<br>anticholinergic: 0.55<br><br>Proportion of patients with PDC ≥0.80 at 1 year:<br>mirabegron: 43.6%<br>anticholinergic: 30.9% | <b>Medication type</b><br>Users of mirabegron appeared to achieve greater persistence and adherence at 1 year than users of anticholinergics |

For peer review only

| Author (year)                   | Persistence*                                                                                                                                                                                                                                                                                                                                                                                                                                                                                                                                                                                                                                                                                                                                                                                                                                                                                                                                                                                                                                                                                                                                                                                                                                                                                                                                                                                                                                                                                                                        | Adherence*   | Determinants of persistence and adherence                                                                                                                                                                                                                                                                                  |
|---------------------------------|-------------------------------------------------------------------------------------------------------------------------------------------------------------------------------------------------------------------------------------------------------------------------------------------------------------------------------------------------------------------------------------------------------------------------------------------------------------------------------------------------------------------------------------------------------------------------------------------------------------------------------------------------------------------------------------------------------------------------------------------------------------------------------------------------------------------------------------------------------------------------------------------------------------------------------------------------------------------------------------------------------------------------------------------------------------------------------------------------------------------------------------------------------------------------------------------------------------------------------------------------------------------------------------------------------------------------------------------------------------------------------------------------------------------------------------------------------------------------------------------------------------------------------------|--------------|----------------------------------------------------------------------------------------------------------------------------------------------------------------------------------------------------------------------------------------------------------------------------------------------------------------------------|
| Wagg et al (2012) <sup>26</sup> | <p>Time (days) to discontinuation (or a gap &gt;1.5 times the length of the previous prescription without a refill):</p> <p>darifenacin: 135.9<br/>           flavoxate: 77.4<br/>           oxybutynin ER: 146.7<br/>           oxybutynin IR: 119.3<br/>           propiverine: 141.1<br/>           solifenacin: 158.7 (5 mg); 216.0 (10 mg)<br/>           tolterodine ER: 156.7<br/>           tolterodine IR: 151.7<br/>           trospium: 138.5</p> <p>Proportion of patients persistent at 3 months:</p> <p>darifenacin: 52%<br/>           flavoxate: 28%<br/>           oxybutynin ER: 44%<br/>           oxybutynin IR: 40%<br/>           propiverine: 47%<br/>           solifenacin: 58%<br/>           tolterodine ER: 47%<br/>           tolterodine IR: 46%<br/>           trospium: 42%</p> <p>Proportion of patients persistent at 6 months:</p> <p>darifenacin: 30%<br/>           flavoxate: 16%<br/>           oxybutynin ER: 35%<br/>           oxybutynin IR: 29%<br/>           propiverine: 36%<br/>           solifenacin: 46%<br/>           tolterodine ER: 36%<br/>           tolterodine IR: 33%<br/>           trospium: 33%</p> <p>Proportion of patients persistent at 1 year:</p> <p>darifenacin: 17.4%<br/>           flavoxate: 13.5%<br/>           oxybutynin ER: 26.1%<br/>           oxybutynin IR: 21.7%<br/>           propiverine: 26.8%<br/>           solifenacin: 35%<br/>           tolterodine ER: 28.2%<br/>           tolterodine IR: 24.1%<br/>           trospium: 25.9%</p> | Not reported | <p><b>Age</b><br/>           Over 1 year, the majority of patients aged ≥60 years were more likely to persist than younger patients. Graphical results only</p> <p><b>Medication type</b><br/>           Patients receiving solifenacin spent the longest mean duration on therapy compared with other OAB medications</p> |



| Author (year)                   | Persistence*                                                                                                                                                                                                                                                                                                                                                                                                                                                                                                                                                                                                                                                                          | Adherence*                                                                                                                                                                            | Determinants of persistence and adherence                                                                                                                                                                                                                                                                                                                                                                                                                                                                                                                                                                                                                                           |
|---------------------------------|---------------------------------------------------------------------------------------------------------------------------------------------------------------------------------------------------------------------------------------------------------------------------------------------------------------------------------------------------------------------------------------------------------------------------------------------------------------------------------------------------------------------------------------------------------------------------------------------------------------------------------------------------------------------------------------|---------------------------------------------------------------------------------------------------------------------------------------------------------------------------------------|-------------------------------------------------------------------------------------------------------------------------------------------------------------------------------------------------------------------------------------------------------------------------------------------------------------------------------------------------------------------------------------------------------------------------------------------------------------------------------------------------------------------------------------------------------------------------------------------------------------------------------------------------------------------------------------|
| Wagg et al (2015) <sup>27</sup> | <p>Proportion of patients persistent at 1 year (without switching or experiencing a gap <math>\geq</math>30 days):</p> <p>mirabegron: 31.7%<br/> fesoterodine: 21.0%<br/> oxybutynin ER: 18.9%<br/> oxybutynin IR: 13.8%<br/> solifenacin: 22.0%<br/> tolterodine ER: 19.7%</p> <p>Median duration of treatment (days):</p> <p>mirabegron: 221<br/> solifenacin: 108<br/> fesoterodine: 100<br/> tolterodine ER: 100<br/> oxybutynin ER: 100<br/> oxybutynin IR: 75</p> <p>Proportion of patients persistent at 1 year:</p> <p>treatment-naïve: 19.0%<br/> treatment-experienced: 30.0%</p> <p>Median days on therapy:</p> <p>treatment-naïve: 90<br/> treatment-experienced: 205</p> | <p>Median MPR at 1 year:</p> <p>mirabegron: 0.645<br/> fesoterodine: 0.492<br/> oxybutynin ER: 0.328<br/> oxybutynin IR: 0.186<br/> solifenacin: 0.459<br/> tolterodine ER: 0.454</p> | <p><b>Age</b></p> <p>As age increased, median MPR increased for OAB medications:</p> <p>&lt;46 years: 0.273<br/> 45–64 years: 0.372<br/> <math>\geq</math>65 years: 0.492<br/> (p&lt;0.001 difference compared to <math>\geq</math>65 years)</p> <p><b>Treatment status</b></p> <p>Patients with prior experience of OAB medication use achieved a higher MPR than treatment-naïve patients (0.546 vs 0.328, p&lt;0.001)</p> <p><b>Medication type</b></p> <p>Compared with antimuscarinics, patients taking mirabegron demonstrated greater persistence and statistically significantly greater adherence (64.5% vs 18.6%–49.2%, p&lt;0.001) than those taking antimuscarinics</p> |

| Author (year)                   | Persistence*                                                                                                                                                                                                                                                                                                                                                                                                                                                                                                                                 | Adherence*                                                                                                                                               | Determinants of persistence and adherence                                                                                                                                                                                                                                                                                                                                                                                                                                                                                                                                                                                                                                                                                                                                                                                                                                                                                                                                                |
|---------------------------------|----------------------------------------------------------------------------------------------------------------------------------------------------------------------------------------------------------------------------------------------------------------------------------------------------------------------------------------------------------------------------------------------------------------------------------------------------------------------------------------------------------------------------------------------|----------------------------------------------------------------------------------------------------------------------------------------------------------|------------------------------------------------------------------------------------------------------------------------------------------------------------------------------------------------------------------------------------------------------------------------------------------------------------------------------------------------------------------------------------------------------------------------------------------------------------------------------------------------------------------------------------------------------------------------------------------------------------------------------------------------------------------------------------------------------------------------------------------------------------------------------------------------------------------------------------------------------------------------------------------------------------------------------------------------------------------------------------------|
| Wagg et al (2015) <sup>28</sup> | <p>Proportion of patients persistent at 6 months: &lt;40%</p> <p>Proportion of patients discontinued at 4 years:</p> <p>oxybutynin: 93%</p> <p>tolterodine IR: 90%</p> <p>tolterodine ER: 90%</p> <p>solifenacin: 90%</p> <p>darifenacin: 91%</p> <p>trospium: 94%</p> <p>flavoxate: 98%</p> <p>overall: 91.4%</p> <p>Median duration of first-line treatment (days):</p> <p>oxybutynin: 60</p> <p>tolterodine IR: 90</p> <p>tolterodine ER: 100</p> <p>solifenacin: 106</p> <p>darifenacin: 91</p> <p>trospium: 90</p> <p>flavoxate: 10</p> | Not reported                                                                                                                                             | <p><b>Medication type</b></p> <p>Initial treatment with solifenacin, darifenacin, tolterodine ER and tolterodine was associated with a significantly lower risk of discontinuation compared with oxybutynin as the first medication (HRs 0.68, 0.72, 0.77 and 0.84, respectively; p&lt;0.001 vs oxybutynin for each)</p> <p>Patients receiving flavoxate as initial treatment had a significantly higher risk of discontinuation compared with those who received oxybutynin (HR 2.48, p&lt;0.0001)</p> <p>There was no statistically significant difference in the risk of discontinuation with trospium as first-line compared with oxybutynin (p=0.1074)</p> <p><b>Age</b></p> <p>Compared with patients aged 40–64 years, patients aged &lt;20, 20–39, 65–74 and ≥75 years had a higher risk of discontinuation (HRs 1.08–1.19, all p≤0.0022)</p> <p><b>Gender</b></p> <p>Males had a slightly higher risk of discontinuation than females (HR 1.03, 95% CI 1.00–1.06, p=0.0341)</p> |
| Yeaw et al (2009) <sup>29</sup> | <p>Proportion of patients remaining on therapy (without a refill gap &gt;60 days) at:</p> <p>6 months: 28%</p> <p>1 year: 18%</p>                                                                                                                                                                                                                                                                                                                                                                                                            | Proportion of patients with mean MPR at 1 year: 35%                                                                                                      | Not reported                                                                                                                                                                                                                                                                                                                                                                                                                                                                                                                                                                                                                                                                                                                                                                                                                                                                                                                                                                             |
| Yu et al (2005) <sup>30</sup>   | <p>Proportion of patients without index prescription refill within the first 6 months: 36.9%</p> <p>Proportion of patients discontinued at:</p> <p>1 month: 42.7%</p> <p>2 months: 66.8%</p> <p>5 months days: 77.6%</p> <p>9 months: 86.3%</p> <p>At a 1-year follow-up, the rate of discontinuation was increased to 88.6%</p>                                                                                                                                                                                                             | <p>Mean MPR at:</p> <p>6 months: 0.34</p> <p>1 year: 0.22</p> <p>Proportion of patients with MPR ≥0.80 at:</p> <p>6 months: 4.9%</p> <p>1 year: 0.7%</p> | <p><b>Medication type</b></p> <p>Compared with oxybutynin, patients receiving tolterodine were less likely to have discontinued at 6 months (HR 0.74, 95% CI 0.67–0.81, p&lt;0.01)</p> <p><b>Polypharmacy</b></p> <p>The use of multiple drugs was associated with a higher risk of discontinuation by the 6-month follow up (HR 1.26, 95% CI 1.09–1.46, p&lt;0.01)</p> <p>Other significant predictors of higher persistence included: White ethnicity, previous hospitalization length, and starting treatment with tolterodine</p>                                                                                                                                                                                                                                                                                                                                                                                                                                                    |

1  
2  
3  
4  
5  
6  
7  
8  
9  
10  
11  
12  
13  
14  
15  
16  
17  
18  
19  
20  
21  
22  
23  
24  
25  
26  
27  
28  
29  
30  
31  
32  
33  
34  
35  
36  
37  
38  
39  
40  
41  
42  
43  
44  
45  
46

CI = confidence interval; COPD = chronic obstructive pulmonary disease; ER = extended release; HR = hazard ratio; IR = immediate release; MPR = medication possession ratio; OAB = overactive bladder; OR = odds ratio; PIM = potentially inappropriate medication; PDC = proportion of days covered; RR = risk ratio; SD = standard deviation; UTIs = urinary tract infections

\*In cases where reported values differ from published values, they were derived from the published data; <sup>a</sup>cohort discontinuation percentages are also quoted for 3, 6, 12 and 18 months. However, these figures included some non-oral OAB medications. Therefore, these have not been included; <sup>b</sup>within 1.5x the duration of the initial prescription; <sup>c</sup>over a 4-year period; <sup>d</sup>stopped receiving an OAB medication for  $\geq 6$  months between end of therapy and end of the study's eligibility period; <sup>e</sup>stopped receiving an OAB medication for <6 months before restarting an OAB medication; <sup>f</sup>patients who filled only one prescription were given an MPR of zero; <sup>g</sup>no exact figures were quoted within the article text

For peer review only

## References

1. Brostrom S, Hallas J: Persistence of antimuscarinic drug use. *Eur J Clin Pharmacol* 2009; **65**: 309.
2. Chancellor MB, Migliaccio-Walle K, Bramley TJ et al: Long-term patterns of use and treatment failure with anticholinergic agents for overactive bladder. *Clin Ther* 2013; **35**: 1744.
3. Chapple CR, Nazir J, Hakimi Z et al: Persistence and adherence with mirabegron versus antimuscarinic agents in patients with overactive bladder: a retrospective observational study in UK clinical practice. *Eur Urol* 2017; **72**: 389.
4. Desgagne A, LeLorier J: Incontinence drug utilization patterns in Quebec, Canada. *Value Health* 1999; **2**: 452.
5. D'Souza AO, Smith MJ, Miller LA et al: Persistence, adherence, and switch rates among extended-release and immediate-release overactive bladder medications in a regional managed care plan. *J Manag Care Pharm* 2008; **14**: 291.
6. Gomes T, Juurlink DN, Mamdani MM: Comparative adherence to oxybutynin or tolterodine among older patients. *Eur J Clin Pharmacol* 2012; **68**: 97.
7. Gopal M, Haynes K, Bellamy SL et al: Discontinuation rates of anticholinergic medications used for the treatment of lower urinary tract symptoms. *Obstet Gynecol* 2008; **112**: 1311.
8. Ivanova JI, Hayes-Larson E, Sorg RA et al: Healthcare resource use and costs of privately insured patients who switch, discontinue, or persist on anti-muscarinic therapy for overactive bladder. *J Med Econ* 2014; **17**: 741.
9. Johnston S, Janning SW, Haas GP et al: Comparative persistence and adherence to overactive bladder medications in patients with and without diabetes. *Int J Clin Pract* 2012; **66**: 1042.
10. Kalder M, Pantazis K, Dinas K et al: Discontinuation of treatment using anticholinergic medications in patients with urinary incontinence. *Obstet Gynecol* 2014; **124**: 794.
11. Kleinman NL, Odell K, Chen CI et al: Persistence and adherence with urinary antispasmodic medications among employees and the impact of adherence on costs and absenteeism. *J Manag Care Spec Pharm* 2014; **20**: 1047.
12. Krhut J, Gartner M, Petzel M et al: Persistence with first line anticholinergic medication in treatment-naive overactive bladder patients. *Scand J Urol* 2014; **48**: 79.
13. Manack A, Motsko SP, Haag-Molkenteller C et al: Epidemiology and healthcare utilization of neurogenic bladder patients in a US claims database. *Neurourol Urodyn* 2011; **30**: 395.
14. Mauseth SA, Skurtveit S, Spigset O: Adherence, persistence and switch rates for anticholinergic drugs used for overactive bladder in women: data from the Norwegian Prescription Database. *Acta Obstet Gynecol Scand* 2013; **92**: 1208.
15. Nitti VM, Rovner ES, Franks B et al: Persistence with mirabegron versus tolterodine in patients with overactive bladder. *Am J Pharm Benefits* 2016; **8**: e25.
16. Pelletier EM, Vats V, Clemens JQ: Pharmacotherapy adherence and costs versus nonpharmacologic management in overactive bladder. *Am J Manag Care* 2009; **15**: S108.
17. Perfetto EM, Subedi P, Jumadilova Z: Treatment of overactive bladder: a model comparing extended-release formulations of tolterodine and oxybutynin. *Am J Manag Care* 2005; **11**: S150.
18. Sears CL, Lewis C, Noel K et al: Overactive bladder medication adherence when medication is free to patients. *J Urol* 2010; **183**: 1077.
19. Sicras-Mainar A, Navarro-Artieda R, Ruiz-Torrejon A et al: Persistence and concomitant medication in patients with overactive bladder treated with antimuscarinic agents in primary care. An observational baseline study. *Actas Urol Esp* 2016; **40**: 96.

- 1  
2  
3 20. Sicras-Mainar A, Navarro-Artieda R, Ruiz-Torrejon A et al: Impact of loss of work productivity in patients  
4 with overactive bladder treated with antimuscarinics in Spain: study in routine clinical practice  
5 conditions. *Clin Drug Investig* 2015; **35**: 795.  
6  
7 21. Sicras-Mainar A, Rejas-Gutierrez J, Navarro-Artieda R et al: Use of health care resources and  
8 associated costs in non-institutionalized vulnerable elders with overactive bladder treated with  
9 antimuscarinic agents in the usual medical practice. *Actas Urol Esp* 2014; **38**: 530.  
10  
11 22. Sicras-Mainar A, Rejas J, Navarro-Artieda R et al: Antimuscarinic persistence patterns in newly treated  
12 patients with overactive bladder: a retrospective comparative analysis. *Int Urogynecol J* 2014; **25**: 485.  
13  
14 23. Sicras-Mainar A, Rejas J, Navarro-Artieda R et al: Health economics perspective of fesoterodine,  
15 tolterodine or solifenacin as first-time therapy for overactive bladder syndrome in the primary care  
16 setting in Spain. *BMC Urol* 2013; **13**: 51.  
17  
18 24. Suehs BT, Davis C, Franks B et al: Effect of potentially inappropriate use of antimuscarinic medications  
19 on healthcare use and cost in individuals with overactive bladder. *J Am Geriatr Soc* 2016; **64**: 779.  
20  
21 25. Sussman D, Yehoshua A, Kowalski J et al: Adherence and persistence of mirabegron and  
22 anticholinergic therapies in patients with overactive bladder: a real-world claims data analysis. *Int J Clin  
23 Pract* 2017; **71**: e12824.  
24  
25 26. Wagg A, Compion G, Fahey A et al: Persistence with prescribed antimuscarinic therapy for overactive  
26 bladder: a UK experience. *BJU Int* 2012; **110**: 1767.  
27  
28 27. Wagg A, Franks B, Ramos B et al: Persistence and adherence with the new beta-3 receptor agonist,  
29 mirabegron, versus antimuscarinics in overactive bladder: early experience in Canada. *Can Urol Assoc  
30 J* 2015; **9**: 343.  
31  
32 28. Wagg A, Diles D, Berner T: Treatment patterns for patients on overactive bladder therapy: a  
33 retrospective statistical analysis using Canadian claims data. *JHEOR* 2015; **3**: 43.  
34  
35 29. Yeaw J, Benner JS, Walt JG et al: Comparing adherence and persistence across 6 chronic medication  
36 classes. *J Manag Care Pharm* 2009; **15**: 728.  
37  
38 30. Yu YF, Nichol MB, Yu AP et al: Persistence and adherence of medications for chronic overactive  
39 bladder/urinary incontinence in the California Medicaid program. *Value Health* 2005; **8**: 495.  
40  
41  
42  
43  
44  
45  
46  
47  
48  
49  
50  
51  
52  
53  
54  
55  
56  
57  
58  
59  
60

## Supplemental Information

### Literature Search Strategies

#### The following databases were searched;

- Allied and Complementary Database [AMED] (via OVID)
- Cumulative Index to Nursing and Allied Health Literature [CINAHL] (via EBSCOhost)
- MEDLINE (via EBSCOhost)
- Database of Reviews of Effects [DARE] (via CRD, University of York)
- Health Technology Assessment [HTA] (via CRD, University of York)
- Centre for Reviews and Dissemination [CRD] (via CRD, University of York)

The searches were conducted on the 24<sup>th</sup> April 2017

#### The date span of the searches;

- AMED – 1985 to April 2017
- CINAHL – 1937 to April 2017
- MEDLINE – 1946 to April 2017
- DARE / HTA / CRD – 1994 to April 2017

|   | <b>Searches (AMED)*</b>                                                                                                                                                                                            |    |
|---|--------------------------------------------------------------------------------------------------------------------------------------------------------------------------------------------------------------------|----|
| 1 | persisten* OR adheren* OR complian* OR discont* OR tolera* OR utili* OR database [In Article Title]                                                                                                                | –  |
| 2 | Bladder" OR "Overactive Bladder" OR "OAB" OR urin* OR incontinen* [In Article Title]                                                                                                                               | –  |
| 3 | Oxybutynin OR Tolterodine OR Fesoterodine OR Trospium OR Darifenacin OR Solifenacin OR Propiverine OR Imidafenacin OR Mirabegron OR Flavoxate OR Hyoscyamin* OR Anticholinerg* OR Antimuscarin* [In Article Title] | –  |
| 4 | (#1 AND #2 OR #3)                                                                                                                                                                                                  | 18 |
|   | <b>Searches (CINAHL &amp; MEDLINE)*</b>                                                                                                                                                                            |    |
| 5 | persisten* OR adheren* OR complian* OR discont* OR tolera* OR utili* OR database [In Article Title]                                                                                                                | –  |
| 6 | Bladder" OR "Overactive Bladder" OR "OAB" OR urin* OR incontinen* [In Article Title]                                                                                                                               | –  |
| 7 | Oxybutynin OR Tolterodine OR Fesoterodine OR Trospium OR Darifenacin OR Solifenacin OR Propiverine OR Imidafenacin OR Mirabegron OR Flavoxate OR Hyoscyamin* OR Anticholinerg* OR Antimuscarin* [In Article Title] | –  |

|    |                                                                                                                                                                                                                             |              |
|----|-----------------------------------------------------------------------------------------------------------------------------------------------------------------------------------------------------------------------------|--------------|
| 8  | (#5 AND #6 OR #7)                                                                                                                                                                                                           | 3,855        |
|    | <b>Searches (DARE / HTA / CRD)*</b>                                                                                                                                                                                         |              |
| 9  | persisten* OR adheren* OR complian* OR discont* OR tolera* OR utili* OR<br>database [In Article Title]                                                                                                                      | –            |
| 10 | Bladder" OR "Overactive Bladder" OR "OAB" OR urin* OR incontinen* [In<br>Article Title]                                                                                                                                     | –            |
| 11 | Oxybutynin OR Tolterodine OR Fesoterodine OR Trospium OR Darifenacin OR<br>Solifenacin OR Propiverine OR Imidafenacin OR Mirabegron OR Flavoxate OR<br>Hyoscyamin* OR Anticholinerg* OR Antimuscarin*<br>[In Article Title] | –            |
| 12 | (#9 AND #10 OR #11)                                                                                                                                                                                                         | 24           |
| 13 | Total from #4, #8 and #12                                                                                                                                                                                                   | 3,897        |
| 14 | Remove duplicates from 13 using EndNoteWeb                                                                                                                                                                                  | <b>3,614</b> |

\* Boolean operators were used. No other limits or filters were applied to each database.

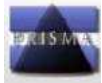

# PRISMA 2009 Checklist

1  
2  
3  
4  
5  
6  
7  
8  
9  
10  
11  
12  
13  
14  
15  
16  
17  
18  
19  
20  
21  
22  
23  
24  
25  
26  
27  
28  
29  
30  
31  
32  
33  
34  
35  
36  
37  
38  
39  
40  
41  
42  
43  
44  
45  
46  
47

| Section/topic                      | #  | Checklist item                                                                                                                                                                                                                                                                                              | Reported on page #    |
|------------------------------------|----|-------------------------------------------------------------------------------------------------------------------------------------------------------------------------------------------------------------------------------------------------------------------------------------------------------------|-----------------------|
| <b>TITLE</b>                       |    |                                                                                                                                                                                                                                                                                                             |                       |
| Title                              | 1  | Identify the report as a systematic review, meta-analysis, or both.                                                                                                                                                                                                                                         | 1                     |
| <b>ABSTRACT</b>                    |    |                                                                                                                                                                                                                                                                                                             |                       |
| Structured summary                 | 2  | Provide a structured summary including, as applicable: background; objectives; data sources; study eligibility criteria, participants, and interventions; study appraisal and synthesis methods; results; limitations; conclusions and implications of key findings; systematic review registration number. | 2                     |
| <b>INTRODUCTION</b>                |    |                                                                                                                                                                                                                                                                                                             |                       |
| Rationale                          | 3  | Describe the rationale for the review in the context of what is already known.                                                                                                                                                                                                                              | 4, 5                  |
| Objectives                         | 4  | Provide an explicit statement of questions being addressed with reference to participants, interventions, comparisons, outcomes, and study design (PICOS).                                                                                                                                                  | 5                     |
| <b>METHODS</b>                     |    |                                                                                                                                                                                                                                                                                                             |                       |
| Protocol and registration          | 5  | Indicate if a review protocol exists, if and where it can be accessed (e.g., Web address), and, if available, provide registration information including registration number.                                                                                                                               | 5                     |
| Eligibility criteria               | 6  | Specify study characteristics (e.g., PICOS, length of follow-up) and report characteristics (e.g., years considered, language, publication status) used as criteria for eligibility, giving rationale.                                                                                                      | 6                     |
| Information sources                | 7  | Describe all information sources (e.g., databases with dates of coverage, contact with study authors to identify additional studies) in the search and date last searched.                                                                                                                                  | 5, 6                  |
| Search                             | 8  | Present full electronic search strategy for at least one database, including any limits used, such that it could be repeated.                                                                                                                                                                               | 6, Suppl. Info        |
| Study selection                    | 9  | State the process for selecting studies (i.e., screening, eligibility, included in systematic review, and, if applicable, included in the meta-analysis).                                                                                                                                                   | 6, 7                  |
| Data collection process            | 10 | Describe method of data extraction from reports (e.g., piloted forms, independently, in duplicate) and any processes for obtaining and confirming data from investigators.                                                                                                                                  | 6, 7                  |
| Data items                         | 11 | List and define all variables for which data were sought (e.g., PICOS, funding sources) and any assumptions and simplifications made.                                                                                                                                                                       | 7, 8                  |
| Risk of bias in individual studies | 12 | Describe methods used for assessing risk of bias of individual studies (including specification of whether this was done at the study or outcome level), and how this information is to be used in any data synthesis.                                                                                      | N/A*                  |
| Summary measures                   | 13 | State the principal summary measures (e.g., risk ratio, difference in means).                                                                                                                                                                                                                               | Suppl. Tables 1 and 2 |



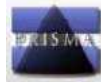

# PRISMA 2009 Checklist

|   |                      |    |                                                                                                                                                           |     |
|---|----------------------|----|-----------------------------------------------------------------------------------------------------------------------------------------------------------|-----|
| 4 | Synthesis of results | 14 | Describe the methods of handling data and combining results of studies, if done, including measures of consistency (e.g., $I^2$ ) for each meta-analysis. | N/A |
|---|----------------------|----|-----------------------------------------------------------------------------------------------------------------------------------------------------------|-----|

Page 1 of 2

| 8  | Section/topic                 | #  | Checklist item                                                                                                                                                                                           | Reported on page #    |
|----|-------------------------------|----|----------------------------------------------------------------------------------------------------------------------------------------------------------------------------------------------------------|-----------------------|
| 10 | Risk of bias across studies   | 15 | Specify any assessment of risk of bias that may affect the cumulative evidence (e.g., publication bias, selective reporting within studies).                                                             | N/A*                  |
| 13 | Additional analyses           | 16 | Describe methods of additional analyses (e.g., sensitivity or subgroup analyses, meta-regression), if done, indicating which were pre-specified.                                                         | N/A                   |
| 16 | <b>RESULTS</b>                |    |                                                                                                                                                                                                          |                       |
| 17 | Study selection               | 17 | Give numbers of studies screened, assessed for eligibility, and included in the review, with reasons for exclusions at each stage, ideally with a flow diagram.                                          | 7, 26                 |
| 20 | Study characteristics         | 18 | For each study, present characteristics for which data were extracted (e.g., study size, PICOS, follow-up period) and provide the citations.                                                             | Suppl. Tables 1 and 2 |
| 22 | Risk of bias within studies   | 19 | Present data on risk of bias of each study and, if available, any outcome level assessment (see item 12).                                                                                                | N/A*                  |
| 24 | Results of individual studies | 20 | For all outcomes considered (benefits or harms), present, for each study: (a) simple summary data for each intervention group (b) effect estimates and confidence intervals, ideally with a forest plot. | Suppl. Tables 1 and 2 |
| 26 | Synthesis of results          | 21 | Present results of each meta-analysis done, including confidence intervals and measures of consistency.                                                                                                  | N/A                   |
| 28 | Risk of bias across studies   | 22 | Present results of any assessment of risk of bias across studies (see Item 15).                                                                                                                          | N/A*                  |
| 29 | Additional analysis           | 23 | Give results of additional analyses, if done (e.g., sensitivity or subgroup analyses, meta-regression [see Item 16]).                                                                                    | N/A                   |
| 32 | <b>DISCUSSION</b>             |    |                                                                                                                                                                                                          |                       |
| 33 | Summary of evidence           | 24 | Summarize the main findings including the strength of evidence for each main outcome; consider their relevance to key groups (e.g., healthcare providers, users, and policy makers).                     | 14                    |
| 36 | Limitations                   | 25 | Discuss limitations at study and outcome level (e.g., risk of bias), and at review-level (e.g., incomplete retrieval of identified research, reporting bias).                                            | 13                    |
| 38 | Conclusions                   | 26 | Provide a general interpretation of the results in the context of other evidence, and implications for future research.                                                                                  | 14                    |
| 41 | <b>FUNDING</b>                |    |                                                                                                                                                                                                          |                       |
| 42 | Funding                       | 27 | Describe sources of funding for the systematic review and other support (e.g., supply of data); role of funders for the systematic review.                                                               | 14, 15                |

N/A, not applicable

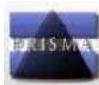

# PRISMA 2009 Checklist

1  
2  
3  
4  
5  
6  
7  
8  
9  
10  
11  
12  
13  
14  
15  
16  
17  
18  
19  
20  
21  
22  
23  
24  
25  
26  
27  
28  
29  
30  
31  
32  
33  
34  
35  
36  
37  
38  
39  
40  
41  
42  
43  
44  
45  
46  
47

**\* A risk of bias tool for database studies is not available**

*From:* Moher D, Liberati A, Tetzlaff J, Altman DG, The PRISMA Group (2009). Preferred Reporting Items for Systematic Reviews and Meta-Analyses: The PRISMA Statement. PLoS Med 6(7): e1000097. doi:10.1371/journal.pmed1000097

For more information, visit: [www.prisma-statement.org](http://www.prisma-statement.org). Page 2 of 2

For peer review only

# BMJ Open

## Real-world persistence and adherence to oral antimuscarinics and mirabegron in patients with overactive bladder (OAB) – a systematic literature review

|                                 |                                                                                                                                                                                                                                                                                                                                                 |
|---------------------------------|-------------------------------------------------------------------------------------------------------------------------------------------------------------------------------------------------------------------------------------------------------------------------------------------------------------------------------------------------|
| Journal:                        | <i>BMJ Open</i>                                                                                                                                                                                                                                                                                                                                 |
| Manuscript ID                   | bmjopen-2018-021889.R1                                                                                                                                                                                                                                                                                                                          |
| Article Type:                   | Research                                                                                                                                                                                                                                                                                                                                        |
| Date Submitted by the Author:   | 12-Jun-2018                                                                                                                                                                                                                                                                                                                                     |
| Complete List of Authors:       | Yeowell, Gillian; Manchester Metropolitan University, Health Professions Department (Physiotherapy)<br>Smith, Philip; Manchester Metropolitan University<br>Nazir, Jameel; Astellas Pharma Europe Ltd<br>Hakimi, Zalmi; Astellas Pharma BV<br>Siddiqui, Emad; Astellas Pharma Europe Ltd<br>Fatoye, Francis; Manchester Metropolitan University |
| <b>Primary Subject Heading</b>: | Urology                                                                                                                                                                                                                                                                                                                                         |
| Secondary Subject Heading:      | Urology                                                                                                                                                                                                                                                                                                                                         |
| Keywords:                       | Overactive bladder, persistence, adherence, antimuscarinics, $\beta$ 3 adrenergic receptor agonists, systematic literature review                                                                                                                                                                                                               |
|                                 |                                                                                                                                                                                                                                                                                                                                                 |

SCHOLARONE™  
Manuscripts

Only

1  
2  
3 **Real-world persistence and adherence to oral antimuscarinics and**  
4  
5 **mirabegron in patients with overactive bladder (OAB) – a**  
6  
7 **systematic literature review**  
8  
9

10  
11  
12  
13 **Gillian Yeowell<sup>1</sup>, Philip Smith<sup>1</sup>, Jameel Nazir<sup>2</sup>, Zalmai Hakimi<sup>3\*</sup>, Emad Siddiqui<sup>2</sup>, Francis**  
14 **Fatoye<sup>1</sup>**  
15  
16

17  
18  
19  
20  
21 <sup>1</sup>*Manchester Metropolitan University, Manchester, UK*  
22

23 <sup>2</sup>*Astellas Pharma Europe Ltd., Chertsey, UK*  
24

25 <sup>3</sup>*Astellas Pharma Europe B.V., Leiden, the Netherlands*  
26  
27

28 \*An employee of Astellas Pharma Inc. when the research was conducted  
29  
30

31 **Correspondence:**

32 Gillian Yeowell  
33 Health Professions Department (Physiotherapy)  
34 Birley Building  
35 Birley Fields Campus  
36 53 Bonsall Street  
37 Manchester M15 6GX  
38 Email: [G.Yeowell@mmu.ac.uk](mailto:G.Yeowell@mmu.ac.uk)  
39 Tel: 0161 247 2967  
40  
41  
42  
43  
44  
45  
46  
47

48 **Running head:** Adherence and persistence to OAB medication  
49  
50  
51

52 **Key Words:** Overactive bladder, persistence, adherence, antimuscarinics,  $\beta_3$ -adrenergic  
53 receptor agonists, systematic literature review  
54  
55  
56  
57

## ABSTRACT

**Purpose** To evaluate persistence and adherence of oral pharmacotherapy used in the treatment of overactive bladder (OAB) in a real-world setting.

**Materials and Methods** Systematic literature searches of six electronic publication databases were performed to identify observational studies of OAB patients treated with antimuscarinics and/or mirabegron. Studies obtaining persistence and adherence data from sources other than electronic prescription claims were excluded. Reference lists of identified studies and relevant systematic reviews were assessed to identify additional relevant studies.

**Results** The search identified 3897 studies, of which 30 were included. Overall, persistence ranged from 5–47%. In studies reporting data for antimuscarinics and mirabegron (n=3), 1-year persistence was 12–25% and 32–38%, respectively. Median time to discontinuation was <5 months for antimuscarinics (except one study [6.5 months]) and 5.6–7.4 months for mirabegron. The proportion of patients adherent at 1 year varied between 15–44%. In studies reporting adherence for antimuscarinics and mirabegron, adherence was higher with mirabegron (mean medication possession ratio (MPR): 0.59 vs 0.41–0.53; mean proportion of days covered: 0.66 vs 0.55; and median MPR: 0.65 vs 0.19–0.49). Reported determinants of persistence and adherence included female gender, older age group, use of extended-release formulation and treatment experience.

**Conclusion** Most patients with OAB discontinued oral OAB pharmacotherapy and were non-adherent 1 year after treatment initiation. In general, mirabegron was associated with greater persistence and adherence compared to antimuscarinics. Combined with existing clinical trial evidence, this real-world review merits consideration of mirabegron for first-line pharmacological treatment among patients with OAB.

*The protocol for this systemic review is registered with PROSPERO: CRD42017059894*

## STRENGTHS AND LIMITATIONS

- This systematic literature review includes data for mirabegron, which was approved in 2013 and not covered in previous systematic reviews examining persistence and adherence to overactive bladder medication (OAB).
- Only observational database studies were included in this study, with the intention to provide a more accurate picture of rates of adherence and persistence to OAB medication, which are generally lower in routine clinical practice compared to randomized clinical trials.
- This systematic literature review provides a global picture of adherence and persistence to OAB medication based on the inclusion of data from Canada, Czech Republic, Denmark, Germany, Norway, Spain, the United Kingdom and the United States.
- Although determinants of persistence and adherence were evaluated in this study, the influence of other factors such as patient expectations, appropriate counselling and patient satisfaction with treatment could not be assessed.
- The definitions and calculations of persistence and adherence were not uniform across the literature. These terms were often used interchangeably, limiting the ability to compare across studies.

## INTRODUCTION

Overactive bladder (OAB) is defined as a condition with characteristic symptoms of urinary urgency, usually accompanied by frequency and nocturia, with or without urgency incontinence, in the absence of urinary tract infection (UTI) or other obvious pathology.<sup>1</sup> OAB affects 11.8–24.7% of adults in North America and Europe, and the prevalence increases with age.<sup>2</sup> In addition to age, risk factors for developing OAB include diabetes, UTIs and obesity.<sup>3 4</sup>

OAB symptoms are associated with a negative impact on health-related quality of life (HRQoL) and a significant economic burden. Indeed, bothersome OAB symptoms may lead to depression and anxiety, and sleep disturbances, which can adversely affect a patient's daily, social and professional functioning.<sup>5 6</sup> Whilst the cost of pharmaceutical treatment represents only a small fraction of the total therapy cost, the provision of containment products (eg, pads), treatment for clinical depression, nursing home stays and loss of productivity due to work absenteeism are the main cost drivers in OAB.<sup>7 8</sup> For example, the total annual cost of OAB was estimated to be \$24.9 billion in the United States in 2007<sup>9</sup> and €9.7 billion across five European countries (Germany, Italy, Spain, Sweden and the United Kingdom) and Canada in 2005.<sup>8</sup>

Behavioural and lifestyle modifications are routinely the initial treatment strategy for OAB, and pharmacotherapy is recommended only if conservative management is not effective.<sup>10</sup> As OAB is a chronic condition, it is important that patients continue with treatment to control symptoms.<sup>11</sup> Lack of persistence (time from treatment initiation to discontinuation),<sup>12</sup> and adherence (extent to which a patient acts in accordance with the prescribed interval and dose of a dosing regimen)<sup>12</sup> to medication are considered the leading causes of preventable morbidity in patients with chronic conditions;<sup>13 14</sup> they are also associated with greater indirect costs.<sup>14</sup> Studies have reported that patients compliant and adherent to OAB medication experienced significantly improved urinary symptoms and

1  
2  
3 HRQoL compared with patients who were non-persistent<sup>15 16</sup>. Although antimuscarinics are  
4 the current mainstay of oral pharmacotherapy, they are often associated with bothersome  
5 anticholinergic side effects, such as dry mouth and constipation; tolerability is one of the  
6 most common reasons for treatment discontinuation.<sup>11 17-20</sup> In a systematic review of  
7 antimuscarinic treatment in patients with OAB, rates of discontinuation at 12 weeks ranged  
8 from 4–31% in clinical trials and 43–83% in medical claims databases.<sup>19</sup>

9  
10  
11  
12  
13  
14  
15 The other class of oral pharmacotherapy approved for the treatment of OAB is  
16  $\beta_3$ -adrenergic receptor agonists. Mirabegron is currently the only commercially available  
17 agent of this class licensed in countries across Europe, North America and Asia.<sup>21-23</sup> Due to  
18 mirabegron's mechanism of action, the incidence of side effects typically reported with  
19 antimuscarinic treatment are low with mirabegron and generally similar to placebo,<sup>24</sup> which  
20 may translate into better treatment persistence.<sup>25 26</sup> In addition, results of a recent economic  
21 analysis found that increased persistence with mirabegron treatment vs antimuscarinics was  
22 associated with reduced healthcare resource use and work hours lost, resulting in lower total  
23 costs.<sup>27</sup>

24  
25  
26  
27  
28  
29  
30  
31  
32  
33  
34 In general, rates of persistence and adherence with antimuscarinics and mirabegron are  
35 typically lower in routine clinical practice compared to interventional clinical trials.<sup>11 28</sup> To help  
36 identify factors affecting long-term persistence and adherence to OAB pharmacotherapy, a  
37 contemporary, comprehensive review of real-world evidence is needed. As mirabegron was  
38 a relatively new OAB treatment, it was not included in previous systematic reviews.  
39  
40 Therefore, the current analysis aims to systematically review prospective and retrospective  
41 observational database studies conducted with antimuscarinics and/or mirabegron to  
42 determine the rates and determinants of persistence and adherence.

## 43 44 45 46 47 48 49 50 51 **METHODS**

52  
53  
54 This systematic literature review (SLR) was conducted in accordance with guidelines for the  
55 Meta-analysis of Observational Studies in Epidemiology (MOOSE)<sup>29</sup>. The protocol for the



1  
2  
3 review was registered *a priori* with the International Prospective Register of Systematic  
4 Reviews (registered January 18, 2017 with PROSPERO CRD42017059894).  
5  
6

7  
8 Searches were performed April 27, 2017 via the following electronic databases: Allied  
9 and Complementary Medicine Database (AMED); Cumulative Index to Nursing and Allied  
10 Health Literature (CINAHL); MEDLINE; Database of Abstracts of Reviews of Effects (DARE);  
11 Health Technology Assessment (HTA) database; and the Centre for Reviews and  
12 Dissemination (CRD) database. The search terms were persisten\* OR adheren\* OR  
13 complian\* OR discont\* OR tolera\* OR utili\* OR database [Title], AND "bladder" OR  
14 "overactive bladder" OR "OAB" OR urin\* OR incontinen\* [Title], OR oxybutynin OR  
15 tolterodine OR fesoterodine OR trospium OR darifenacin OR solifenacin OR propiverine OR  
16 imidafenacin OR mirabegron OR flavoxate OR hyoscyamin\* OR anticholinerg\* OR  
17 antimuscarin\* [Title].  
18  
19  
20  
21  
22  
23  
24  
25  
26

27  
28 All search results were exported into EndNote Web (Thomas Reuter, CA, USA)  
29 bibliography software and duplicates removed electronically and manually. The full electronic  
30 search strategy is outlined in the Supplemental information.  
31  
32  
33  
34

### 35 **Patient and public involvement**

36  
37  
38 Patients and or the public were not involved in this study.  
39  
40

### 41 **Inclusion and exclusion criteria**

42  
43 Inclusion criteria were: prospective and retrospective observational database studies  
44 investigating persistence and adherence to oral medication for the treatment of OAB in  
45 adults, conducted in any geographical location and published on any date, within a peer-  
46 reviewed source. Exclusion criteria were: abstract unavailable; studies not yet fully  
47 completed; randomised controlled trials (RCTs); systematic reviews; narrative literature  
48 reviews; conference papers; single case studies/reports; studies investigating OAB  
49 medication among only healthy, asymptomatic participants; studies from which oral-only  
50  
51  
52  
53  
54  
55  
56  
57  
58  
59  
60

1  
2  
3 OAB persistence/adherence results cannot be isolated from other results (ie, transdermal  
4 patches); and studies containing patients aged <18 years (where the data pertaining to  
5 these patients could not be removed from the results) and studies not published in English.  
6  
7 Populations with lower urinary tract symptoms due to stress incontinence and benign  
8  
9 prostatic hyperplasia were also excluded.  
10  
11

### 12 13 **Study selection**

14  
15 Duplicates were removed and title and abstract screenings were performed by two  
16  
17 independent researchers (PS and GY). Full-text articles were obtained and studies were  
18  
19 excluded if they did not meet the inclusion criteria.<sup>30</sup> Any disagreement in study selection  
20  
21 was to be resolved through discussion and consultation with another member of the project  
22  
23 team (FF) where necessary. During screening, open-label extension studies of RCTs were  
24  
25 excluded as the trial designs were unlikely to reflect a real-world setting. Studies utilising  
26  
27 data from hospital records, in addition to large-scale databases, were included provided that  
28  
29 persistence and adherence data were determined from prescription claims data rather than  
30  
31 extracted from supplemental patient interviews, patient-supplied pill counts or subjective  
32  
33 questionnaires. The literature search was supplemented by screening for potential additional  
34  
35 relevant studies identified from the reference lists of eligible articles.  
36  
37

### 38 39 **Data extraction**

40  
41 Parameters that may affect persistence or adherence were collected, including patient  
42  
43 characteristics (age and sex); interventions (initial [index] OAB drug and formulation) and  
44  
45 comorbidities. The definitions, outcomes and determinants of treatment persistence and  
46  
47 adherence were also collected, where reported. The extracted data were evaluated by one  
48  
49 researcher and verified by a second researcher.  
50

### 51 52 **Data analysis**

53  
54 A descriptive analysis of extracted results is presented. No meta-analysis was planned due  
55  
56 to the expected heterogeneity of reporting methodologies and data across studies.  
57

## RESULTS

### Brief overview of studies

Overall, 3897 articles were identified from the literature search; 3,614 were screened for title/abstract and 75 were assessed for eligibility (figure 1). Thirty articles were included in the SLR (supplementary table 1), including three identified from reference lists.<sup>31-33</sup> The articles described the findings of 28 independent studies. There was nil disagreement between the two independent researchers (PS, GY) during the screening process.

The data were collected from patients treated in Europe (12 studies) and North America (18 studies) (supplementary table 1) and were included in the analysis. The number of participants included in the published studies ranged from 377 to 103 250. Where stated, the mean age of the participants ranged from 44 to 80 years and the duration of follow-up ranged from 6 months to 7 years. Prescribed antimuscarinic interventions for patients with OAB included darifenacin, fesoterodine, flavoxate, hyoscyamine, imipramine, oxybutynin, propiverine, solifenacin, tolterodine and trospium chloride. Mirabegron was prescribed in four studies.<sup>18 31 32 34</sup> Uncommon oral interventions included imipramine, a tricyclic antidepressant with an unknown mechanism of action in the context of OAB,<sup>35</sup> and bethanechol, a muscarinic receptor agonist.<sup>33</sup> The methods used to quantify adherence and persistence differed across the studies (supplementary table 1). In general, medication possession rate (MPR) or proportion of days covered (PDC) by prescription were typically used as a measure of adherence to a drug. Persistence was typically defined as the proportion of patients continuing therapy/refilling prescriptions for the follow-up period (without discontinuing the index drug or switching to other OAB drug[s]) and/or the median time to discontinuation (TTD).

### Persistence

Overall, persistence rates decreased over time, regardless of agent (supplementary table 2).

### **Antimuscarinic studies**

Data for persistence (or discontinuation) at approximately 6 months was available in 14 articles<sup>32 33 36-47</sup> which reported data on antimuscarinics only. Yeaw 2009 was an exception due to the inclusion of bethanechol (a muscarinic receptor agonist), which accounted for <1.5% of the pharmacy claims for OAB medications.<sup>33</sup> The proportion of patients persistent at 6 months was <50% except for the studies of Sicras-Mainar *et al*,<sup>42-44</sup> where persistence ranged from 57–71%. In addition, two studies reported discontinuation rates of 6–43% after 1 month of initial treatment.<sup>41 47</sup>

At 1 year, persistence rates for antimuscarinics across 19 studies ranged from around 5% up to 47%.<sup>18 26 34-36 38 40 42 43 45 46 48-53</sup> Median TTD was <5 months (30 to 128 days) for all medications across all studies,<sup>18 26 32 34 38 48 54</sup> with the exception of Krhut *et al*<sup>40</sup> (6.5 months). At 2 years, over 75% of patients discontinued treatment.<sup>36 38 50 54 55</sup> Rates of treatment switching were infrequently reported, and where provided, were ≤17% of patients.<sup>32 37 39 48 52 54 55</sup>

### **Antimuscarinic and mirabegron studies**

In all four studies, a greater proportion of patients persisted with mirabegron compared with antimuscarinics. In one study, persistence rates for tolterodine and mirabegron at 6 months were 19% and 35%, respectively.<sup>31</sup> Persistence at 1 year ranged from 8–25% for antimuscarinics and from 32–38% for mirabegron, as reported in three studies.<sup>18 26 34</sup> Where tested inferentially, 1-year persistence was statistically significantly greater with mirabegron compared to antimuscarinics ( $p < 0.0001$ ), with the exception of oxybutynin ( $p = 0.002$ ).<sup>18</sup> The risk of discontinuing within 1 year was also greater with antimuscarinics compared to mirabegron ( $p < 0.001$ ).<sup>18 32</sup> Overall, mirabegron, solifenacin and fesoterodine were associated with the highest rates of persistence.<sup>18 26</sup>

Across the four studies, 40–81% and 83–96% of the mirabegron and antimuscarinic patient cohorts were treatment naïve, having received no OAB drug for at least 6 months prior to

1  
2  
3 their first index of OAB treatment.<sup>18 31 32 34</sup> Studies typically found that treatment-naïve  
4 patients prescribed mirabegron or antimuscarinics had lower persistence than treatment-  
5 experienced patients prescribed the same OAB treatments. In the three studies that  
6 assessed persistence in treatment-experienced and treatment-naïve populations,  
7 persistence was higher with mirabegron treatment (significantly in two studies) compared  
8 with antimuscarinics.<sup>18 31 32</sup>

9  
10  
11 Median TTD in the overall study populations was longer with mirabegron (5.6–7.4  
12 months) compared with the assessed antimuscarinics (1.0–3.6 months).<sup>18 26 31 34</sup>

### 13 14 15 **Adherence**

16  
17 Adherence rates to all OAB medications reduced over time in all studies and varied across  
18 studies (supplementary table 2).

### 19 20 21 **Antimuscarinic studies**

22  
23 At 1 year, the proportion of adherent patients varied between 1%<sup>47</sup> and 36%,<sup>48</sup> across those  
24 studies that provided these data. Few studies reported adherence beyond 1 year. However,  
25 Sears *et al* reported that 34% of patients were adherent at the end of 3 years,<sup>56</sup> which was  
26 comparable to the adherence rates reported by some other studies at just 1 year.<sup>48 52</sup>

### 27 28 29 **Antimuscarinic and mirabegron studies**

30  
31 In the three studies, adherence at 1 year was significantly higher in patients receiving  
32 mirabegron compared with antimuscarinics (mean MPR: 0.59 vs 0.41 to 0.53; mean PDC:  
33 0.66 vs 0.55; and median MPR: 0.65 vs 0.19 to 0.49).<sup>18 26 34</sup> The proportion of patients  
34 adherent at 1 year was also greater with mirabegron compared with antimuscarinics (mean  
35 MPR  $\geq$ 0.80: 43% vs 22–35%; mean PDC  $\geq$ 0.80: 44% vs 31%).<sup>18 26</sup> Within treatment-naïve  
36 patients specifically, adherence was greater with mirabegron compared to antimuscarinics  
37 0.59 vs. 0.39–0.51, p values 0.02 to <0.0001).<sup>18</sup>

### Determinants of persistence and adherence

Determinants of persistence and adherence were reported in 24 of the 30 studies. As expected, most studies reported medication type as a determinant of persistence/adherence (figure 2; supplementary table 2). In general, persistence and adherence were higher in: older patients compared with younger patients,<sup>26 31 32 35-39 46 48-50 52 54 57</sup> female patients compared with their male counterparts,<sup>32 35 36 39 49 50 57</sup> except in one study,<sup>56</sup> patients receiving extended-release (ER) formulations compared with immediate-release formulations,<sup>48 54</sup> and treated patients compared to treatment naïve patients (or untreated in the pre-index period [6 months or 1 year]).<sup>18 26 36</sup> Comorbidities, including diabetes, Parkinson's disease, epilepsy, dementia, multiple sclerosis and hypertension, were correlated with increased treatment persistence and adherence,<sup>49 50 57</sup> exceptions were chronic obstructive pulmonary disease and migraine.<sup>50 57</sup>

Other reported determinants of favorable persistence and adherence included higher treatment doses,<sup>36</sup> low daily quantity of tablets,<sup>37</sup> absence of UTI; higher baseline OAB costs;<sup>39</sup> treatment by urologists vs gynecologists/general practitioners; the absence of side effects (headache, stomach upset and glaucoma);<sup>50</sup> White vs Black, Hispanic and Asian patients and patients of other ethnicities,<sup>35 47</sup> lower medication co-payment,<sup>35</sup> and use of fewer medications.<sup>47</sup>

### DISCUSSION

This systematic review provides an overview of persistence and adherence with oral pharmacotherapies used to treat patients with OAB in real-life clinical practice. A wealth of data were collected from 30 articles, which described 28 observational studies performed in Europe and North America totaling over 500 000 patients. A number of key findings were identified, including greater persistence and adherence with mirabegron vs antimuscarinics,<sup>18 26 31 34</sup> in females vs males,<sup>32 35 39 49 57</sup> in older vs younger patients,<sup>26 31 32 35-39 46 48-50 52 54 57</sup> and in previously treated vs untreated patients.<sup>18 26 36</sup>

1  
2  
3 Across the studies, persistence appeared to reduce very quickly after initiation of  
4 treatment for all OAB therapies, with low rates (<50%) already evident at 1 month.<sup>31 41 47</sup>  
5  
6 Longer follow-up periods showed that large proportions of patients discontinued treatment by  
7  
8 1 year (62–100%)<sup>18 26 33 38 45–47 49 50 54</sup> and by the end of 3 years, less than 10% of patients  
9  
10 continued on any antimuscarinic.<sup>54</sup> These steep reductions in rates of persistence over time  
11  
12 were mirrored by the reported adherence rates.  
13  
14

15  
16 The chronic nature of OAB means that consistent and long-term use of medication is  
17  
18 essential to manage OAB symptoms and improve health outcomes. It is therefore important  
19  
20 for patients to receive a first-line treatment that has a good efficacy-tolerability profile and  
21  
22 evidence of favorable persistence and adherence vs other treatment options. Among the  
23  
24 antimuscarinics, solifenacin and fesoterodine were generally associated with better  
25  
26 persistence and adherence.<sup>18 26 43 52</sup> In studies that assessed both mirabegron and  
27  
28 antimuscarinics, persistence in the mirabegron cohorts, including the treatment-naïve  
29  
30 populations, was statistically significantly greater ( $p < 0.001$ ).<sup>18 26 31</sup> Due to the recommended  
31  
32 treatment sequence for OAB<sup>10 58</sup>, the majority of patients that receive mirabegron are  
33  
34 treatment-experienced; however, these studies suggest a benefit of mirabegron treatment  
35  
36 regardless of treatment status. Adherence to mirabegron was also greater; however,  
37  
38 mean/median MPR values in the overall mirabegron populations did not indicate medication  
39  
40 adherence (MPR/PDC < 0.80). Although these studies did not directly assess the reason(s)  
41  
42 for the observed benefits of mirabegron, proposed reasons include a distinct mechanism of  
43  
44 action, lower rates of bothersome anticholinergic adverse events, particularly dry-mouth,  
45  
46 compared with antimuscarinics and unmet expectations of antimuscarinic treatment.<sup>18 26 31</sup>  
47

48  
49 It is well established that poor medication persistence and adherence reduces the ability  
50  
51 to achieve optimum clinical benefits and limits treatment success, especially for chronic  
52  
53 conditions such as OAB.<sup>13 14 17 46</sup> The unwillingness of patients to continue to take long-term  
54  
55 treatment has been observed across many chronic conditions, with non-adherence to  
56  
57 medication observed in ~50% of patients.<sup>13</sup> An analysis across six chronic conditions found  
58  
59  
60

1  
2  
3 1-year persistence and adherence rates to be low for all conditions, and lowest for OAB  
4 medications (antimuscarinics),<sup>33</sup> suggesting an unmet treatment need. However, this study  
5 was performed prior to the availability of mirabegron for use in routine clinical practice, and  
6 therefore an updated analysis of persistence in chronic conditions might be warranted.  
7  
8  
9

10  
11 As alluded to above, persistence and adherence to treatment is expected to improve  
12 outcomes for patients with OAB. In two studies, better OAB treatment persistence and  
13 adherence were associated with improved clinical outcomes and HRQoL compared with  
14 patients who were non-persistent.<sup>15 16</sup> These data are consistent with studies describing  
15 other chronic diseases, such as diabetes and depression, where good adherence resulted in  
16 improved health outcomes<sup>14 59</sup> as well as reduced complications and disability, and improved  
17 HRQoL and life expectancy.<sup>60</sup> Moreover, greater persistence and adherence to treatment for  
18 OAB is associated with significantly lower medical, sick leave and short-term disability  
19 costs.<sup>35</sup> Indeed, economic models based on real-world inputs suggest that improved  
20 persistence with mirabegron translates into benefits of reduced healthcare resource use, and  
21 lower direct and indirect costs of treatment compared with antimuscarinics.<sup>27 61</sup> Additionally,  
22 mirabegron is reported to be cost effective vs six antimuscarinics from commercial and  
23 Medicare perspectives in the United States, due to fewer projected adverse events and  
24 comorbidities, and data suggesting better persistence.<sup>62</sup>  
25  
26  
27  
28  
29  
30  
31  
32  
33  
34  
35  
36  
37  
38  
39

40  
41 Independent variables for treatment discontinuation were studied by at least half of the  
42 papers included in our literature review, of which sex, age, comorbidities and previous  
43 experience of OAB medications were shown to be important factors in more than two  
44 studies. Only six studies reported switch-rates and although these were low, the treatment  
45 strategy of cycling antimuscarinic agents in patients who do not achieve symptom relief is  
46 common in clinical practice. Yet recent analysis of real-world data suggests that switching  
47 antimuscarinics may provide sub-optimal care.<sup>55</sup> In contrast, switching to mirabegron from  
48 antimuscarinic therapy has proved beneficial in over 50% of patients with OAB in an  
49 observational study.<sup>63</sup>  
50  
51  
52  
53  
54  
55  
56  
57  
58  
59  
60



1  
2  
3 This review represents a large pooled analysis of real-world data for persistence and  
4 adherence to oral OAB medication across different geographical locations (Canada, Czech  
5 Republic, Denmark, Germany, Norway, Spain, the United Kingdom and the United States);  
6 however, there were no identifiable trends between data and countries. The definitions and  
7 calculations of persistence and adherence were not uniform across the literature and the  
8 terms were often used interchangeably. This lack of consistency led to some limitations on  
9 the ability to compare across studies. Other limitations to performing cross-study  
10 comparisons or pooled analyses in this SLR include differences in the individual study  
11 populations and/or study designs, resulting in considerable variations between data. For  
12 example, the median TTD for oxybutynin ER and tolterodine ER were determined to be 5.1  
13 and 5.5 months, respectively, by one study,<sup>54</sup> but only 60 and 56 days, respectively, by  
14 another study.<sup>18</sup>

15  
16  
17  
18  
19  
20  
21  
22  
23  
24  
25  
26  
27 Furthermore, it is very difficult to capture the specific reasons for treatment  
28 discontinuation from prescription-driven or medical claim data rather than patient-derived  
29 data.<sup>18</sup> The current review excluded data from RCTs to better reflect patient behavior in the  
30 general OAB population in real-life clinical practice.<sup>11</sup> Only one paper included in our review  
31 reported that antimuscarinic side effects were significantly associated with discontinuation,<sup>50</sup>  
32 despite reports that such side effects are bothersome and a common reason for  
33 discontinuation of antimuscarinic treatment.<sup>11 19 28</sup> Additional factors that could not be  
34 assessed by our study, but can influence persistence with treatment in OAB patients are  
35 patient expectations, appropriate counselling and patient satisfaction with treatment.<sup>11 17 28</sup>

36  
37  
38  
39  
40  
41  
42  
43  
44  
45  
46 In addition to the limitations listed above, it should be noted that Sicras-Mainar *et al*<sup>42 43</sup>  
47 reported data on the same patients (in terms of demographics and the  
48 timeframe/geographical source). This is also the case for two studies published by Sicras-  
49 Mainar *et al* in 2013 and 2014.<sup>53 64</sup> Also, this SLR excluded data on non-oral  
50 pharmacotherapies (eg, onabotulinum toxin A) and combination mirabegron plus  
51 antimuscarinic therapies, where additional efficacy has been reported compared to the  
52  
53  
54  
55  
56  
57  
58  
59  
60

1  
2  
3 monotherapies.<sup>65</sup> Further research on persistence and adherence to these OAB therapies is  
4  
5 needed to better evaluate current treatment options. Additional studies are also required to  
6  
7 improve our understanding of persistence and adherence in OAB, including qualitative  
8  
9 studies to examine the reasons for discontinuation and real-world studies to examine  
10  
11 resource use associated with OAB medication in relation to adherence and persistence. As  
12  
13 OAB is a chronic disease, clinicians should not only take into consideration the efficacy and  
14  
15 side effects of an agent when deciding on treatment options, but also ensure that realistic  
16  
17 patient expectations from treatment are set through patient education and counselling. The  
18  
19 patient's life-style should also be considered as this is likely to impact adherence and  
20  
21 persistence with OAB therapy.

## 22 23 **CONCLUSIONS**

24  
25  
26 Persistence and adherence were greater with mirabegron compared with antimuscarinics,  
27  
28 and appeared to be greater with solifenacin and fesoterodine compared with other  
29  
30 antimuscarinics. In addition, greater persistence and adherence were generally observed in  
31  
32 patients who were female, older, treatment-experienced and receiving ER formulations.  
33  
34 Together with the efficacy and tolerability data from clinical trials, real-world data examined  
35  
36 in this review warrants consideration of using mirabegron as first-line oral pharmacotherapy  
37  
38 for patients with OAB.  
39  
40  
41  
42  
43  
44  
45  
46  
47  
48  
49  
50  
51  
52  
53  
54  
55  
56  
57  
58  
59  
60

## Acknowledgments

Medical writing support was provided by Claire Chinn, PhD, and Kinnari Patel, PhD, of Bioscript Medical and funded by Astellas Pharma Global Development.

## Contributorship Statement

GY, PS, JN, ZH, ES and FF were involved in conceptualisation and design of the study and critical review of the manuscript. FF, PS and GY performed the data extraction. All authors approved the final manuscript as submitted.

## Competing Interests

JN and ES are employed by Astellas Pharma Inc. ZH was employed by Astellas Pharma Inc. as the time of the study. FF has received a grant from Astellas for study design, data extraction and manuscript development.

## Funding

The study was supported by Astellas Pharma Global Development.

## Data Sharing Statement

The search strategy and all data supporting this study are provided as supplementary information accompanying this paper.

## Abbreviations and Acronyms

ER = extended-release

HRQoL = health-related quality of life

MPR = medication possession rate

OAB = overactive bladder

1  
2  
3 PDC = proportion of days covered  
4

5 PRISMA = Preferred Reporting Items for Systematic Reviews and Meta-Analyses  
6  
7

8 RCTs = randomised controlled trials  
9

10 SLR = systematic literature review  
11  
12

13  
14 TTD = time to discontinuation  
15  
16

17 UTI = urinary tract infection  
18  
19  
20  
21  
22  
23  
24  
25  
26  
27  
28  
29  
30  
31  
32  
33  
34  
35  
36  
37  
38  
39  
40  
41  
42  
43  
44  
45  
46  
47  
48  
49  
50  
51  
52  
53  
54  
55  
56  
57  
58  
59  
60

**REFERENCES**

1. Abrams P, Cardozo L, Fall M, *et al*. The standardisation of terminology of lower urinary tract function: report from the Standardisation Sub-committee of the International Continence Society. *Neurourol Urodyn* 2002;21(2):167-78.
2. Eapen RS, Radomski SB. Review of the epidemiology of overactive bladder. *Res Rep Urol* 2016;8:71-6. doi: 10.2147/RRU.S102441
3. Brown JS, McGhan WF, Chokroverty S. Comorbidities associated with overactive bladder. *Am J Manag Care* 2000;6(11 Suppl):S574-9.
4. Subak LL, Richter HE, Hunskaar S. Obesity and urinary incontinence: epidemiology and clinical research update. *J Urol* 2009;182(6 Suppl):S2-7. doi: 10.1016/j.juro.2009.08.071
5. Coyne KS, Payne C, Bhattacharyya SK, *et al*. The impact of urinary urgency and frequency on health-related quality of life in overactive bladder: results from a national community survey. *Value Health* 2004;7(4):455-63. doi: 10.1111/j.1524-4733.2004.74008.x
6. Coyne KS, Sexton CC, Kopp ZS, *et al*. The impact of overactive bladder on mental health, work productivity and health-related quality of life in the UK and Sweden: results from EpiLUTS. *BJU Int* 2011;108(9):1459-71. doi: 10.1111/j.1464-410X.2010.10013.x
7. Herschorn S. Global perspective of treatment failures. *Can Urol Assoc J* 2013;7(9-10 Suppl 4):S170-1. doi: 10.5489/cuaj.1613
8. Irwin DE, Mungapen L, Milsom I, *et al*. The economic impact of overactive bladder syndrome in six Western countries. *BJU Int* 2009;103(2):202-9. doi: 10.1111/j.1464-410X.2008.08036.x

- 1  
2  
3 9. Onukwugha E, Zuckerman IH, McNally D, *et al*. The total economic burden of overactive  
4 bladder in the United States: a disease-specific approach. *Am J Manag Care*  
5 2009;15(4 Suppl):S90-7.  
6  
7  
8  
9  
10 10. Lucas M, Bedretidnova D, Berghmans L, *et al*. European Association of Urology.  
11 Guidelines on urinary incontinence. 2015. [http://uroweb.org/wp-content/uploads/20-](http://uroweb.org/wp-content/uploads/20-Urinary-Incontinence_LR1.pdf)  
12 [Urinary-Incontinence\\_LR1.pdf](http://uroweb.org/wp-content/uploads/20-Urinary-Incontinence_LR1.pdf) (accessed October 2016).  
13  
14  
15  
16 11. Kim TH, Lee KS. Persistence and compliance with medication management in the  
17 treatment of overactive bladder. *Investig Clin Urol* 2016;57(2):84-93. doi:  
18 10.4111/icu.2016.57.2.84  
19  
20  
21  
22  
23 12. Cramer JA, Roy A, Burrell A, *et al*. Medication compliance and persistence: terminology  
24 and definitions. *Value Health* 2008;11(1):44-7. doi: 10.1111/j.1524-  
25 4733.2007.00213.x  
26  
27  
28  
29  
30 13. Brown MT, Bussell J, Dutta S, *et al*. Medication adherence: truth and consequences. *Am*  
31 *J Med Sci* 2016;351(4):387-99. doi: 10.1016/j.amjms.2016.01.010  
32  
33  
34  
35 14. World Health Organization. Adherence to long-term therapies: evidence for action. 2003.  
36 [http://www.who.int/chp/knowledge/publications/adherence\\_report/en/](http://www.who.int/chp/knowledge/publications/adherence_report/en/) (accessed  
37 November 2016).  
38  
39  
40  
41  
42 15. Andy UU, Arya LA, Smith AL, *et al*. Is self-reported adherence associated with clinical  
43 outcomes in women treated with anticholinergic medication for overactive bladder?  
44 *Neurourol Urodyn* 2016;35(6):738-42. doi: 10.1002/nau.22798  
45  
46  
47  
48  
49 16. Kim TH, Choo MS, Kim YJ, *et al*. Drug persistence and compliance affect patient-  
50 reported outcomes in overactive bladder syndrome. *Qual Life Res* 2016;25(8):2021-  
51 9. doi: 10.1007/s11136-015-1216-z  
52  
53  
54  
55  
56  
57  
58  
59  
60

- 1  
2  
3 17. Benner JS, Nichol MB, Rovner ES, *et al*. Patient-reported reasons for discontinuing  
4 overactive bladder medication. *BJU Int* 2010;105(9):1276-82. doi: 10.1111/j.1464-  
5 410X.2009.09036.x  
6  
7  
8  
9  
10 18. Chapple CR, Nazir J, Hakimi Z, *et al*. Persistence and adherence with mirabegron  
11 versus antimuscarinic agents in patients with overactive bladder: a retrospective  
12 observational study in UK clinical practice. *Eur Urol* 2017;72(3):389-99. doi:  
13 10.1016/j.eururo.2017.01.037  
14  
15  
16  
17  
18 19. Sexton CC, Notte SM, Maroulis C, *et al*. Persistence and adherence in the treatment of  
19 overactive bladder syndrome with anticholinergic therapy: a systematic review of the  
20 literature. *Int J Clin Pract* 2011;65(5):567-85. doi: 10.1111/j.1742-1241.2010.02626.x  
21  
22  
23  
24  
25 20. Veenboer PW, Bosch JL. Long-term adherence to antimuscarinic therapy in everyday  
26 practice: a systematic review. *J Urol* 2014;191(4):1003-8. doi:  
27 10.1016/j.juro.2013.10.046  
28  
29  
30  
31  
32 21. European Medicines Agency. Mirabegron summary of product characteristics. 2016.  
33 [http://www.ema.europa.eu/docs/en\\_GB/document\\_library/EPAR -](http://www.ema.europa.eu/docs/en_GB/document_library/EPAR_-_Product_Information/human/002388/WC500137309.pdf)  
34 [\\_Product Information/human/002388/WC500137309.pdf](http://www.ema.europa.eu/docs/en_GB/document_library/EPAR_-_Product_Information/human/002388/WC500137309.pdf) (accessed December  
35 2016).  
36  
37  
38  
39  
40  
41 22. Food and Drug Administration. Drug approval package. Myrbetriq (mirabegron) extended  
42 release tablets. 2012.  
43 [https://www.accessdata.fda.gov/drugsatfda\\_docs/nda/2012/202611Orig1s000TOC.cfm](https://www.accessdata.fda.gov/drugsatfda_docs/nda/2012/202611Orig1s000TOC.cfm).  
44  
45  
46  
47  
48  
49  
50 23. Pharmaceuticals and Medical Devices Agency. Betanis. Review of deliberation results.  
51 2011; (August 2017). <http://www.pmda.go.jp/files/000204240.pdf>.  
52  
53  
54  
55  
56  
57  
58  
59  
60

- 1  
2  
3 24. Maman K, Aballea S, Nazir J, *et al.* Comparative efficacy and safety of medical  
4 treatments for the management of overactive bladder: a systematic literature review  
5 and mixed treatment comparison. *Eur Urol* 2014;65(4):755-65. doi:  
6  
7 10.1016/j.eururo.2013.11.010  
8  
9  
10  
11 25. Kobayashi M, Nukui A, Kamai T. Comparative efficacy and tolerability of antimuscarinic  
12 agents and the selective beta3-adrenoceptor agonist, mirabegron, for the treatment  
13 of overactive bladder: which is more preferable as an initial treatment? *Low Urin*  
14 *Tract Symptoms* 2016:Epub ahead of print. doi: 10.1111/luts.12153  
15  
16  
17  
18  
19  
20 26. Wagg A, Franks B, Ramos B, *et al.* Persistence and adherence with the new beta-3  
21 receptor agonist, mirabegron, versus antimuscarinics in overactive bladder: early  
22 experience in Canada. *Can Urol Assoc J* 2015;9(9-10):343-50. doi:  
23  
24 10.5489/cuaj.3098  
25  
26  
27  
28  
29 27. Nazir J, Berling M, McCrea C, *et al.* Economic impact of mirabegron versus  
30 antimuscarinics for the treatment of overactive bladder in the UK.  
31  
32 *Pharmacoeconomics Open* 2017;1:25-36.  
33  
34  
35  
36 28. Basra RK, Wagg A, Chapple C, *et al.* A review of adherence to drug therapy in patients  
37 with overactive bladder. *BJU Int* 2008;102(7):774-9. doi: 10.1111/j.1464-  
38 410X.2008.07769.x  
39  
40  
41  
42  
43 29. Stroup DF, Berlin JA, Morton SC, *et al.* Meta-analysis of observational studies in  
44 epidemiology: a proposal for reporting. Meta-analysis Of Observational Studies in  
45 Epidemiology (MOOSE) group. *JAMA* 2000;283(15):2008-12.  
46  
47  
48  
49  
50 30. Moher D, Liberati A, Tetzlaff J, *et al.* Preferred reporting items for systematic reviews and  
51 meta-analyses: the PRISMA statement. *Int J Surg* 2010;8(5):336-41. doi:  
52  
53 10.1016/j.ijsu.2010.02.007  
54  
55  
56  
57  
58  
59  
60



- 1  
2  
3 31. Nitti VM, Rovner ES, Franks B, *et al.* Persistence with mirabegron versus tolterodine in  
4 patients with overactive bladder. *Am J Pharm Benefits* 2016;8(2):e25-e33.  
5  
6  
7  
8 32. Wagg A, Diles D, Berner T. Treatment patterns for patients on overactive bladder  
9 therapy: a retrospective statistical analysis using Canadian claims data. *JHEOR*  
10 2015;3(1):43-55.  
11  
12  
13  
14 33. Yeaw J, Benner JS, Walt JG, *et al.* Comparing adherence and persistence across 6  
15 chronic medication classes. *J Manag Care Pharm* 2009;15(9):728-40. doi:  
16 10.18553/jmcp.2009.15.9.728  
17  
18  
19  
20  
21 34. Sussman D, Yehoshua A, Kowalski J, *et al.* Adherence and persistence of mirabegron  
22 and anticholinergic therapies in patients with overactive bladder: a real-world claims  
23 data analysis. *Int J Clin Pract* 2017;71(3-4):e12824. doi: 10.1111/ijcp.12824  
24  
25  
26  
27  
28 35. Kleinman NL, Odell K, Chen CI, *et al.* Persistence and adherence with urinary  
29 antispasmodic medications among employees and the impact of adherence on costs  
30 and absenteeism. *J Manag Care Spec Pharm* 2014;20(10):1047-56. doi:  
31 10.18553/jmcp.2014.20.10.1047  
32  
33  
34  
35  
36  
37 36. Brostrom S, Hallas J. Persistence of antimuscarinic drug use. *Eur J Clin Pharmacol*  
38 2009;65(3):309-14. doi: 10.1007/s00228-008-0600-9  
39  
40  
41  
42 37. Desgagne A, LeLorier J. Incontinence drug utilization patterns in Quebec, Canada. *Value*  
43 *Health* 1999;2(6):452-8. doi: 10.1046/j.1524-4733.1999.26005.x  
44  
45  
46  
47 38. Gomes T, Juurlink DN, Mamdani MM. Comparative adherence to oxybutynin or  
48 tolterodine among older patients. *Eur J Clin Pharmacol* 2012;68(1):97-9. doi:  
49 10.1007/s00228-011-1090-8  
50  
51  
52  
53  
54 39. Ivanova JI, Hayes-Larson E, Sorg RA, *et al.* Healthcare resource use and costs of  
55 privately insured patients who switch, discontinue, or persist on anti-muscarinic  
56  
57  
58  
59  
60

- 1  
2  
3 therapy for overactive bladder. *J Med Econ* 2014;17(10):741-50. doi:  
4 10.3111/13696998.2014.941066  
5  
6  
7  
8 40. Krhut J, Gartner M, Petzel M, *et al.* Persistence with first line anticholinergic medication  
9 in treatment-naive overactive bladder patients. *Scand J Urol* 2014;48(1):79-83. doi:  
10 10.3109/21681805.2013.814707  
11  
12  
13  
14 41. Perfetto EM, Subedi P, Jumadilova Z. Treatment of overactive bladder: a model  
15 comparing extended-release formulations of tolterodine and oxybutynin. *Am J Manag*  
16 *Care* 2005;11(4 Suppl):S150-7.  
17  
18  
19  
20  
21 42. Sicras-Mainar A, Navarro-Artieda R, Ruiz-Torrejon A, *et al.* Impact of loss of work  
22 productivity in patients with overactive bladder treated with antimuscarinics in Spain:  
23 study in routine clinical practice conditions. *Clin Drug Investig* 2015;35(12):795-805.  
24 doi: 10.1007/s40261-015-0342-2  
25  
26  
27  
28  
29  
30 43. Sicras-Mainar A, Navarro-Artieda R, Ruiz-Torrejon A, *et al.* Persistence and concomitant  
31 medication in patients with overactive bladder treated with antimuscarinic agents in  
32 primary care. An observational baseline study. *Actas Urol Esp* 2016;40(2):96-101.  
33 doi: 10.1016/j.acuro.2015.09.004  
34  
35  
36  
37  
38  
39 44. Sicras-Mainar A, Rejas-Gutierrez J, Navarro-Artieda R, *et al.* Use of health care  
40 resources and associated costs in non-institutionalized vulnerable elders with  
41 overactive bladder treated with antimuscarinic agents in the usual medical practice.  
42 *Actas Urol Esp* 2014;38(8):530-7. doi: 10.1016/j.acuro.2014.02.001  
43  
44  
45  
46  
47  
48 45. Suehs BT, Davis C, Franks B, *et al.* Effect of potentially inappropriate use of  
49 antimuscarinic medications on healthcare use and cost in individuals with overactive  
50 bladder. *J Am Geriatr Soc* 2016;64(4):779-87. doi: 10.1111/jgs.14030  
51  
52  
53  
54  
55  
56  
57  
58  
59  
60

- 1  
2  
3 46. Wagg A, Compion G, Fahey A, *et al.* Persistence with prescribed antimuscarinic therapy  
4 for overactive bladder: a UK experience. *BJU Int* 2012;110(11):1767-74. doi:  
5 10.1111/j.1464-410X.2012.11023.x  
6  
7  
8  
9  
10 47. Yu YF, Nichol MB, Yu AP, *et al.* Persistence and adherence of medications for chronic  
11 overactive bladder/urinary incontinence in the California Medicaid program. *Value*  
12 *Health* 2005;8(4):495-505. doi: 10.1111/j.1524-4733.2005.00041.x  
13  
14  
15  
16 48. D'Souza AO, Smith MJ, Miller LA, *et al.* Persistence, adherence, and switch rates among  
17 extended-release and immediate-release overactive bladder medications in a  
18 regional managed care plan. *J Manag Care Pharm* 2008;14(3):291-301. doi:  
19 10.18553/jmcp.2008.14.3.291  
20  
21  
22  
23  
24  
25 49. Johnston S, Janning SW, Haas GP, *et al.* Comparative persistence and adherence to  
26 overactive bladder medications in patients with and without diabetes. *Int J Clin Pract*  
27 2012;66(11):1042-51. doi: 10.1111/j.1742-1241.2012.03009.x  
28  
29  
30  
31  
32 50. Kalder M, Pantazis K, Dinas K, *et al.* Discontinuation of treatment using anticholinergic  
33 medications in patients with urinary incontinence. *Obstet Gynecol* 2014;124(4):794-  
34 800. doi: 10.1097/AOG.0000000000000468  
35  
36  
37  
38  
39 51. Manack A, Motsko SP, Haag-Molkenteller C, *et al.* Epidemiology and healthcare  
40 utilization of neurogenic bladder patients in a US claims database. *Neurourol Urodyn*  
41 2011;30(3):395-401. doi: 10.1002/nau.21003  
42  
43  
44  
45  
46 52. Mauseth SA, Skurtveit S, Spigset O. Adherence, persistence and switch rates for  
47 anticholinergic drugs used for overactive bladder in women: data from the Norwegian  
48 Prescription Database. *Acta Obstet Gynecol Scand* 2013;92(10):1208-15. doi:  
49 10.1111/aogs.12196  
50  
51  
52  
53  
54  
55  
56  
57  
58  
59  
60

- 1  
2  
3 53. Sicras-Mainar A, Rejas J, Navarro-Artieda R, *et al.* Antimuscarinic persistence patterns  
4 in newly treated patients with overactive bladder: a retrospective comparative  
5 analysis. *Int Urogynecol J* 2014;25(4):485-92. doi: 10.1007/s00192-013-2250-4  
6  
7  
8  
9  
10 54. Gopal M, Haynes K, Bellamy SL, *et al.* Discontinuation rates of anticholinergic  
11 medications used for the treatment of lower urinary tract symptoms. *Obstet Gynecol*  
12 2008;112(6):1311-8. doi: 10.1097/AOG.0b013e31818e8aa4  
13  
14  
15  
16 55. Chancellor MB, Migliaccio-Walle K, Bramley TJ, *et al.* Long-term patterns of use and  
17 treatment failure with anticholinergic agents for overactive bladder. *Clin Ther*  
18 2013;35(11):1744-51. doi: 10.1016/j.clinthera.2013.08.017  
19  
20  
21  
22  
23 56. Sears CL, Lewis C, Noel K, *et al.* Overactive bladder medication adherence when  
24 medication is free to patients. *J Urol* 2010;183(3):1077-81. doi:  
25 10.1016/j.juro.2009.11.026  
26  
27  
28  
29  
30 57. Pelletier EM, Vats V, Clemens JQ. Pharmacotherapy adherence and costs versus  
31 nonpharmacologic management in overactive bladder. *Am J Manag Care* 2009;15(4  
32 Suppl):S108-14.  
33  
34  
35  
36  
37 58. National Institute for Health and Care Excellence. Mirabegron for treating symptoms of  
38 overactive bladder, 2013.  
39  
40  
41  
42 59. Thompson C, Peveler RC, Stephenson D, *et al.* Compliance with antidepressant  
43 medication in the treatment of major depressive disorder in primary care: a  
44 randomized comparison of fluoxetine and a tricyclic antidepressant. *Am J Psychiatry*  
45 2000;157(3):338-43. doi: 10.1176/appi.ajp.157.3.338  
46  
47  
48  
49  
50  
51 60. Anderson BJ, Vangsness L, Connell A, *et al.* Family conflict, adherence, and glycaemic  
52 control in youth with short duration Type 1 diabetes. *Diabet Med* 2002;19(8):635-42.  
53  
54  
55  
56  
57  
58  
59  
60

- 1  
2  
3 61. Hakimi Z, Nazir J, McCrea C, *et al*. Clinical and economic impact of mirabegron  
4 compared with antimuscarinics for the treatment of overactive bladder in Canada. *J*  
5 *Med Econ* 2017;20(6):614-22. doi: 10.1080/13696998.2017.1294595  
6  
7  
8  
9  
10 62. Wielage RC, Perk S, Campbell NL, *et al*. Mirabegron for the treatment of overactive  
11 bladder: cost-effectiveness from US commercial health-plan and Medicare  
12 Advantage perspectives. *J Med Econ* 2016;19(12):1135-43. doi:  
13 10.1080/13696998.2016.1204307  
14  
15  
16  
17  
18 63. Liao CH, Kuo HC. High satisfaction with direct switching from antimuscarinics to  
19 mirabegron in patients receiving stable antimuscarinic treatment. *Medicine*  
20 *(Baltimore)* 2016;95(45):e4962. doi: 10.1097/MD.0000000000004962  
21  
22  
23  
24  
25 64. Sicras-Mainar A, Rejas J, Navarro-Artieda R, *et al*. Health economics perspective of  
26 fesoterodine, tolterodine or solifenacin as first-time therapy for overactive bladder  
27 syndrome in the primary care setting in Spain. *BMC Urol* 2013;13:51. doi:  
28 10.1186/1471-2490-13-51  
29  
30  
31  
32  
33  
34 65. Drake MJ, Chapple C, Esen AA, *et al*. Efficacy and safety of mirabegron add-on therapy  
35 to solifenacin in incontinent overactive bladder patients with an inadequate response  
36 to initial 4-week solifenacin monotherapy: a randomised double-blind multicentre  
37 phase 3B study (BESIDE). *Eur Urol* 2016;70(1):136-45. doi:  
38 10.1016/j.eururo.2016.02.030  
39  
40  
41  
42  
43  
44  
45  
46  
47  
48  
49  
50  
51  
52  
53  
54  
55  
56  
57  
58  
59  
60

## FIGURE LEGENDS

### **Figure 1** Search strategy and selection of studies presented in the Preferred Reporting Items for Systematic Reviews and Meta-Analyses (PRISMA) flow diagram

\*Studies were excluded for the following reasons: outcome measure(s) of persistence and/or adherence, relevant to this systematic review (such as medication possession rate, proportion of days covered, discontinuation rate), were not presented within the full text of the article (n=17); adherence/persistence data were drawn from surveys, interviews or self-reports (n=13); cohort contained a portion of patients under 18 years of age (who could not be removed or isolated from results/data) (n=7); participants had prior awareness/knowledge of partaking in a study related to OAB medication (ie, open-label extension to a study or prior written consent) (n=6); a full article text was not available (ie, only a conference abstract) or the full text was not in English (n=1); or non-oral OAB medications were included within the presented results (and could not be removed or isolated from results/data) (n=1)

§Three of these studies were identified by reviewing reference lists of included studies and relevant systematic literature reviews

### **Figure 2** Frequency for reported determinants of discontinuation

\*In one study the relationship was not statistically significant

\*\*Includes dose, formulation, race, prior infection, financial burden, prescriber profession, side effects, medication co-payment and polypharmacy

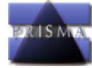

PRISMA 2009 Flow Diagram

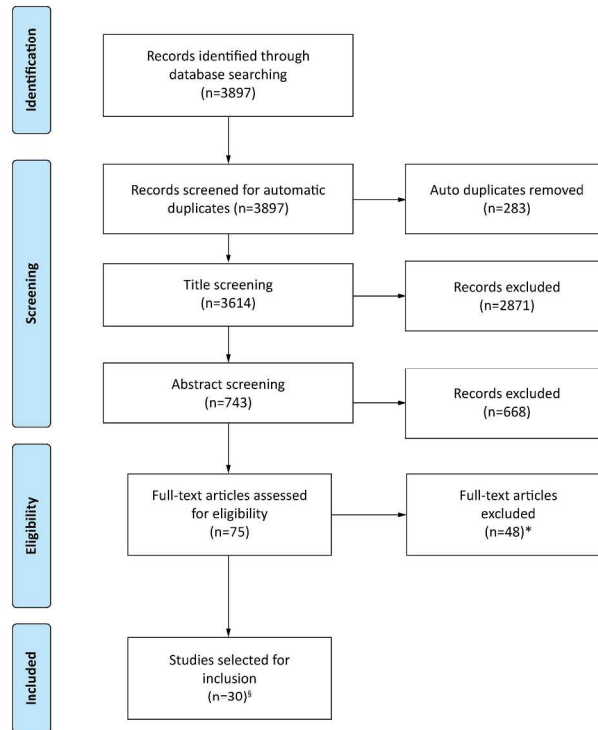

From: Moher D, Liberati A, Tetzlaff J, Altman DG, The PRISMA Group (2009). Preferred Reporting Items for Systematic Reviews and Meta-Analyses: The PRISMA Statement. PLoS Med 6(7): e1000097. doi:10.1371/journal.pmed1000097

For more information, visit [www.prisma-statement.org](http://www.prisma-statement.org).

Figure 1 Search strategy and selection of studies presented in the Preferred Reporting Items for Systematic Reviews and Meta-Analyses (PRISMA) flow diagram

279x361mm (300 x 300 DPI)

1  
2  
3  
4  
5  
6  
7  
8  
9  
10  
11  
12  
13  
14  
15  
16  
17  
18  
19  
20  
21  
22  
23  
24  
25  
26  
27  
28  
29  
30  
31  
32  
33  
34  
35  
36  
37  
38  
39  
40  
41  
42  
43  
44  
45  
46  
47  
48  
49  
50  
51  
52  
53  
54  
55  
56  
57  
58  
59  
60

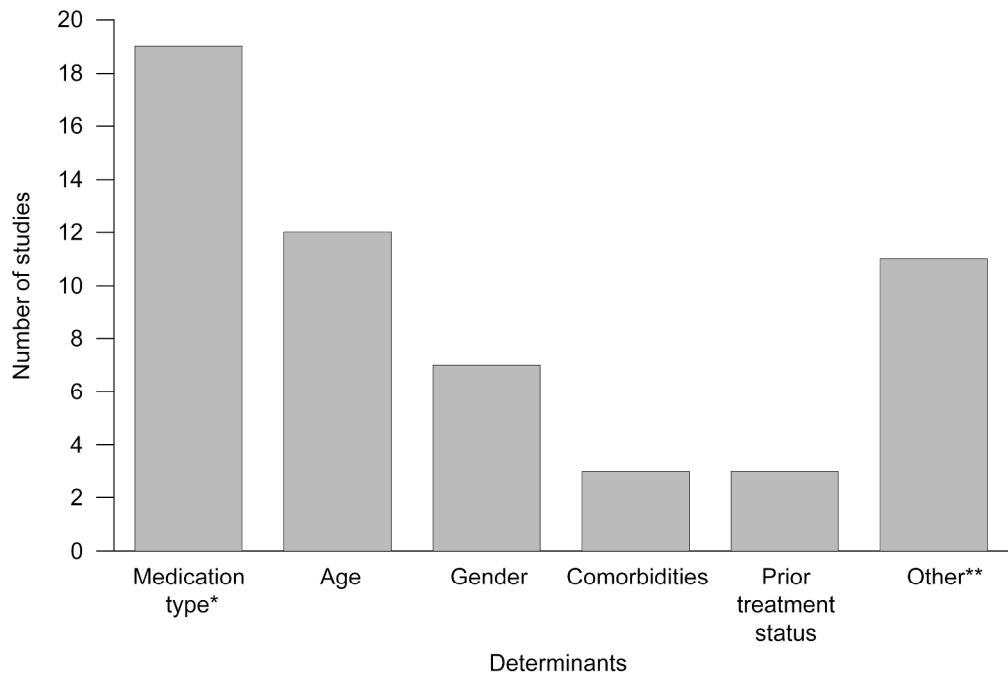

Figure 2 Frequency for reported determinants of discontinuation

273x182mm (300 x 300 DPI)

view only



**Supplemental Table 1:** Patient characteristics, interventions and definitions/variables of persistence, adherence and discontinuation reported in the studies.

| Author (year) and country (database)                                                                                      | Participants                                                                                                                  | Drug/intervention*                                                                                                                                                                                                                                                                                                                                                                                                       | Definition of persistence/adherence/discontinuation and independent variables on persistence                                                                                                                                                                        | Length of follow-up |
|---------------------------------------------------------------------------------------------------------------------------|-------------------------------------------------------------------------------------------------------------------------------|--------------------------------------------------------------------------------------------------------------------------------------------------------------------------------------------------------------------------------------------------------------------------------------------------------------------------------------------------------------------------------------------------------------------------|---------------------------------------------------------------------------------------------------------------------------------------------------------------------------------------------------------------------------------------------------------------------|---------------------|
| Brostrøm and Hallas (2009) <sup>1</sup><br>Odense University Pharmacoepidemiological Database (OPED); Denmark (1999–2006) | n=2477<br>Male: n=836 (33.8%)<br>Female: n=1641 (66.2%)<br>Mean age: 68.3 years <sup>a</sup>                                  | Any prescription of OAB medication:<br>flavoxate (n=21)<br>oxybutynin TD (n=48)<br>tolterodine (n=1478)<br>solifenacin (n=774)<br>trospium (n=271)<br>darifenacin (n=52)                                                                                                                                                                                                                                                 | Patients who continued taking a particular drug for up to 7 years with no more than 120-day gaps were regarded as experiencing single-treatment episodes<br><br>Variables: age, gender, prior use of OAB agents and use of anti-diabetic drugs                      | Up to 7 years       |
| Chancellor et al (2013) <sup>2</sup><br>IMS Lifelink Database, Connecticut; USA (2005–2008)                               | n=103 250<br>Male: n≈25 916 <sup>a</sup> (25.1%)<br>Female: n≈77 334 <sup>a</sup> (74.9%)<br>Mean (SD) age: 58.7 (15.7) years | First (new) prescription of OAB medication in adults ≥18 years:<br>tolterodine ER (n=43 881) <sup>a</sup><br>solifenacin (n=15 488) <sup>a</sup><br>oxybutynin (n=15 075) <sup>a</sup><br>darifenacin (n=10 532) <sup>a</sup><br>oxybutynin ER (n=10 325) <sup>a</sup><br>oxybutynin TD (n=2272) <sup>a</sup><br>tolterodine (n=2581) <sup>a</sup><br>trospium (n=2478) <sup>a</sup><br>trospium ER (n=413) <sup>a</sup> | To be considered a discontinuation, patients were required to have a gap of at least 45 days in therapy based on fill dates and days' supply<br><br>Adherence rate was defined as the proportion of patients filling more than one prescription with an MPR of ≥80% | 2 years             |
| Chapple et al (2017) <sup>3</sup><br>Clinical Practice Research Datalink (CPRD); UK (2013–2014)                           | n=21 996<br>Male: n=6513 (29.6%)<br>Female: n=15 483 (70.4%)<br>Mean (SD) age: 63.9 (16.3) years                              | First (new) prescription of OAB medication in adults ≥18 years:<br>mirabegron (n=1203)<br>darifenacin (n=126)<br>fesoterodine (n=1287)<br>flavoxate (n=144)<br>oxybutynin ER (n=1144)<br>oxybutynin IR (n=5779)<br>propiverine (n=95)<br>solifenacin (n=8191)<br>tolterodine ER (n=1561)<br>tolterodine IR (n=1523)<br>trospium chloride (n=943)                                                                         | Treatment was defined as discontinued if the maximum allowable gap duration was at least 1.5 times the intended duration of the most recent prescription<br><br>Adherence rate was defined as mean MPR at 12 months                                                 | 1 year              |

| Author (year) and country (database)                                                                             | Participants                                                                                                                               | Drug/intervention*                                                                                                                                                                                        | Definition of persistence/adherence/discontinuation and independent variables on persistence                                                                                                                                                                                                                                                                                                          | Length of follow-up |
|------------------------------------------------------------------------------------------------------------------|--------------------------------------------------------------------------------------------------------------------------------------------|-----------------------------------------------------------------------------------------------------------------------------------------------------------------------------------------------------------|-------------------------------------------------------------------------------------------------------------------------------------------------------------------------------------------------------------------------------------------------------------------------------------------------------------------------------------------------------------------------------------------------------|---------------------|
| D'Souza et al (2008) <sup>4</sup><br>Undisclosed medical claims database; USA (1999–2004)                        | n=1117<br>Male: n≈206 <sup>a</sup> (18.4%)<br>Female: n≈911 <sup>a</sup> (81.6%)<br>Mean (SD) age: 55.7 (14.5) years                       | First index of an OAB medication in adults ≥18 years:<br>oxybutynin ER (n=249)<br>oxybutynin IR (n=108)<br>tolterodine ER (n=454)<br>tolterodine IR (n=306)                                               | Persistence was measured as the proportion of patients continuing therapy for 12 months without discontinuing the index drug or switching to other OAB drugs<br><br>Adherence rate was measured as the proportion of patients with an MPR of ≥0.80<br><br>Variables: age, gender, drug formulations and OAB-associated comorbidities (eg, falls/fractures, skin infections, UTIs, anxiety/depression) | 1 year              |
| Desgagné et al (1999) <sup>5</sup><br>Régie de l'assurance maladie du Québec (RAMQ) database; Canada (1994–1997) | n=6690<br>Male: n=2534 (37.9%)<br>Female: n=4156 (62.1%)<br>Mean age: 77.3 years <sup>a</sup>                                              | Patients aged ≥65 years with at least one prescription claim (first index) of:<br>oxybutynin (n=5718)<br>flavoxate (n=972)                                                                                | Persistence evaluated by percentage of patients refilling their initial prescription                                                                                                                                                                                                                                                                                                                  | Up to 4 years       |
| Gomes et al (2012) <sup>6</sup><br>Canada (Ontario Drug Benefit database of prescriptions)                       | n=56 851 <sup>a</sup><br>Male: n≈18 496 (32.5%) <sup>a</sup><br>Female: n≈38 355 (67.5%) <sup>a</sup><br>Mean age: 77.7 years <sup>a</sup> | Patients aged >65 years with a first index (new) claim of:<br>oxybutynin IR (n=31 996)<br>tolterodine ER/IR (n=24 855)                                                                                    | Persistence with treatment was defined by refills for the index drug within an interval defined by the duration specified on the prescription plus a 50% grace period                                                                                                                                                                                                                                 | 2 years             |
| Gopal et al (2008) <sup>7</sup><br>UK (Health Improvement Network database of prescriptions) (1991–2005)         | n=29 369<br>Male: n=0 (0%)<br>Female: n=29 369 (100%)<br>Mean (SD) age: 63.9 (16.8) years                                                  | Women aged ≥18 years prescribed anti-cholinergic medications:<br>tolterodine IR<br>tolterodine ER<br>oxybutynin IR<br>oxybutynin ER<br>flavoxate<br>terodiline<br>trospium<br>propriverine<br>solifenacin | Discontinuation was defined by no anticholinergic prescriptions issued within 90 days after the end of the last anticholinergic drug prescription<br><br>Anticholinergic medications were considered discontinued at the time a patient switched to another medication or as above<br><br>Variables: drug formulation                                                                                 | 3 years             |

| Author (year) and country (database)                                                                     | Participants                                                                                                           | Drug/intervention*                                                                                                                                                                                                                                                              | Definition of persistence/adherence/discontinuation and independent variables on persistence                                                                                                                                                                                                                                                                                                                                                                                                                                                                                                                                                           | Length of follow-up |
|----------------------------------------------------------------------------------------------------------|------------------------------------------------------------------------------------------------------------------------|---------------------------------------------------------------------------------------------------------------------------------------------------------------------------------------------------------------------------------------------------------------------------------|--------------------------------------------------------------------------------------------------------------------------------------------------------------------------------------------------------------------------------------------------------------------------------------------------------------------------------------------------------------------------------------------------------------------------------------------------------------------------------------------------------------------------------------------------------------------------------------------------------------------------------------------------------|---------------------|
| Ivanova et al (2014) <sup>8</sup><br>OptumHealth Reporting and Insights claims database; USA (2007–2012) | n=10 318<br>Male: n=2822 (27.4%) <sup>a</sup><br>Female: n=7496 (72.6%) <sup>a</sup><br>Mean age: 51.6 years           | Patients aged 18 to 64 receiving a new prescription of:<br>darifenacin (n=970) <sup>a</sup><br>solifenacin (n=2662) <sup>a</sup><br>oxybutynin (n=2889) <sup>a</sup><br>tolterodine (n=3116) <sup>a</sup><br>trospium (n=454) <sup>a</sup><br>fesoterodine (n=227) <sup>a</sup> | Persisters were defined as patients who did not switch or discontinue the index antimuscarinic during the first 6 months after the treatment initiation date<br><br>Discontinuation was defined by a gap of at least 60 days between refills within the first 6 months after the treatment initiation date<br><br>Switching was defined as a changed prescription from the index antimuscarinic within the first 6 months after the treatment initiation date (with a gap of 60 days between the end of the day supply of the index antimuscarinic and the new antimuscarinic)<br><br>Variables: age, gender, history of UTIs and index antimuscarinic | 6 months            |
| Johnston et al (2012) <sup>9</sup><br>Truven Health MarketScan® Database; USA (2004–2009)                | n=73 120<br>Male: n=29 406 (40.2%)<br>Female: n=43 714 (59.8%)<br>Mean age: 69.0 years <sup>a</sup>                    | First index drug in OAB patients with or without diabetes, aged ≥18 years:<br>darifenacin<br>oxybutynin<br>solifenacin<br>tolterodine<br>trospium                                                                                                                               | Persistence was measured as the number of days from the index date until a gap in OAB medication of ≥45 days<br><br>Adherence was assessed using the interval-based (fixed time-period) MPR (adherent patients had an ≥80% MPR)<br><br>Variables: age, gender and diabetes                                                                                                                                                                                                                                                                                                                                                                             | 1 year              |
| Kalder et al (2014) <sup>10</sup><br>Disease Analyzer database (IMS Health); Germany (2005–2012)         | n=26 834<br>Male: n=9660 <sup>a</sup> (36%)<br>Female: n=17 174 <sup>a</sup> (64%)<br>Mean (SD) age: 69.4 (13.2) years | First index (new) prescription in patients aged ≥18 years:<br>darifenacin (n=1995)<br>fesoterodine (=811)<br>oxybutynin (n=3813)<br>propiverine (n=2714)<br>solifenacin (n=4844)<br>tolterodine (n=1814)<br>trospium (n=10 843)                                                 | Treatment discontinuation was defined as a period of 90 days without prescription of UI therapy but with at least one visit to the same doctor after 90 days<br><br>Variables: age, gender, comorbidity burden (including diabetes) and antimuscarinic side-effects                                                                                                                                                                                                                                                                                                                                                                                    | 3 years             |

| Author (year) and country (database)                                                                                                                  | Participants                                                                                                                                  | Drug/intervention*                                                                                                                                                                                                                   | Definition of persistence/adherence/discontinuation and independent variables on persistence                                                                                                                                                                                                                                                                                                                                                                                                                          | Length of follow-up |
|-------------------------------------------------------------------------------------------------------------------------------------------------------|-----------------------------------------------------------------------------------------------------------------------------------------------|--------------------------------------------------------------------------------------------------------------------------------------------------------------------------------------------------------------------------------------|-----------------------------------------------------------------------------------------------------------------------------------------------------------------------------------------------------------------------------------------------------------------------------------------------------------------------------------------------------------------------------------------------------------------------------------------------------------------------------------------------------------------------|---------------------|
| Kleinman et al (2014) <sup>11</sup><br>Human Capital Management Services [HCMS] Research Reference Database; USA (2001–2011)                          | n=2960<br>Male: n=878 (29.7%)<br>Female: n=2082 (70.3%)<br>Mean age: 46.6 years                                                               | First index of OAB medication in adults aged 18 to 64 years:<br>darifenacin<br>fesoterodine<br>oxybutynin<br>flavoxate <sup>b</sup><br>solifenacin<br>tolterodine<br>trospium<br>hyoscyamine <sup>b</sup><br>imipramine <sup>b</sup> | Persistence was measured as the number of days from index UA prescription until first $\geq 30$ -day gap in UA medication supply<br><br>Adherence was measured as the percentage of the annual post-index period with available medication                                                                                                                                                                                                                                                                            | 1 year              |
| Krhut et al (2014) <sup>12</sup><br>Dept. of Urology and Dept. of Gynaecology and Obstetrics, University Hospital Ostrava; Czech Republic (2009–2010) | n=377<br>Male: n=52 (13.8%)<br>Female: n=325 (86.2%)<br>Mean (SD) age: 60.3 (13.8) years                                                      | First (new) index of OAB medication within patients attending hospital as an outpatient:<br>trospium (n=189)<br>propiverine (n=41)<br>tolterodine ER (n=9)<br>solifenacin (n=48)<br>fesoterodine (n=90)                              | Persistence was assessed according to the patient records                                                                                                                                                                                                                                                                                                                                                                                                                                                             | 1 year              |
| Manack et al (2011) <sup>13</sup><br>Thomson Reuters MarketScan <sup>®</sup> Commercial and Medicare Supplemental Databases; USA (2002–2007)          | n=46 271 <sup>c</sup><br>Male: n=19 727 (42.6%)<br>Female: n=26 544 (57.4%)<br>Mean (SD) age: 62.5 (19.6) years                               | Patients with neurogenic bladder origin (such as spinal cord injury and multiple sclerosis) receiving an oral OAB medication                                                                                                         | Continuation was defined as $\geq 365$ days of OAB oral drug use beginning at the index date with $\leq 90$ days between the end of therapy and end of eligibility<br><br>Discontinuation was defined as $\geq 6$ months of no OAB oral drug use between the end of therapy and the end of eligibility                                                                                                                                                                                                                | 1 year              |
| Mauseth et al (2013) <sup>14</sup><br>The Norwegian Prescription Database; Norway (2004–2010)                                                         | n=32 178<br>Male: n=0 (0.0%)<br>Female: n=32 178 (100.0%)<br>No mean age reported. The majority of patients (60.5%) were aged $\geq 60$ years | Adult patients aged $\geq 18$ years with a first index (new) prescription of:<br>tolterodine (n=12 389)<br>solifenacin (n=13 682)<br>darifenacin (n=4399)<br>fesoterodine (n=1708)                                                   | Persistence defined as the population who had not discontinued the drug during a period of 365 days after the index date<br><br>A switch was defined as a prescription for another of the drugs included in the study within 365 days after the index date<br><br>Adherence was measured using MPR (sum of days of supply for all tablets purchased, except those received at the last fill, divided by the total number of days from the first to the last filling)<br><br>Variables: age and initial antimuscarinic | 1 year              |

| Author (year) and country (database)                                                               | Participants                                                                                               | Drug/intervention*                                                                                                                                        | Definition of persistence/adherence/discontinuation and independent variables on persistence                                                                                                                                                                                                                                                                                         | Length of follow-up |
|----------------------------------------------------------------------------------------------------|------------------------------------------------------------------------------------------------------------|-----------------------------------------------------------------------------------------------------------------------------------------------------------|--------------------------------------------------------------------------------------------------------------------------------------------------------------------------------------------------------------------------------------------------------------------------------------------------------------------------------------------------------------------------------------|---------------------|
| Nitti et al (2016) <sup>15</sup><br>Optum Database; USA<br>(2010–2013)                             | n=2628<br>Male: n=602 (22.9%)<br>Female: n=2026 (77.1%)<br>Mean age: 57.3 years <sup>a</sup>               | New and existing users aged ≥18 years treated with:<br>mirabegron (n=380)<br>tolterodine ER (n=2248)                                                      | Persistence was defined as a continuous supply of index drug until any 30-day period during which the patient did not have a supply of index drug<br><br>Adherence: the proportion of days covered by the prescription was calculated using prescription fill dates and number of days' supply for each fill of a prescription                                                       | 6 months            |
| Pelletier et al (2009) <sup>16</sup><br>PharMetrics Patient-Centric Database; USA<br>(2005–2006)   | n=43 367<br>Male: n=9675 (22.3%)<br>Female: n=33 692 (77.7%)<br>Mean (SD) age: 51.1 (12.4) years           | Adults aged ≥18 years receiving a first index (new) prescription of:<br>tolterodine ER<br>oxybutynin<br>solifenacin<br>darifenacin<br>trospium            | Adherence was measured by PDC over the 12-month post index period (adherent patients had an ≥80% PDC)<br><br>Variables: age, gender and comorbidity burden (including COPD, congestive heart failure, diabetes, hypertension)                                                                                                                                                        | 1 year              |
| Perfetto et al (2005) <sup>17</sup><br>PharMetrics Patient-Centric Database; USA<br>(2001–2003)    | n=23 328<br>No patient demographics were reported                                                          | All patients with either a new diagnosis of OAB or new use of:<br>tolterodine ER<br>oxybutynin ER                                                         | Discontinuation rates were calculated                                                                                                                                                                                                                                                                                                                                                | 11 months           |
| Sears et al (2010) <sup>18</sup><br>Military Health System; USA<br>(2003–2006)                     | n=7858<br>Male: n=2357 (30.0%)<br>Female: n=5501 (70.0%)<br>Age was not reported                           | Military treatment facility enrollees prescribed:<br>oxybutynin ER (n=136)<br>oxybutynin IR (n=2003)<br>tolterodine ER (n=4716)<br>tolterodine IR (n=992) | Non-persistence was defined as patients who never refilled a prescription for any OAB medication during the 3-year study period<br><br>Medication switch rate was calculated as the proportion of patients who changed medication or dose at least once<br><br>Adherence was defined as the proportion of patients with an MPR of ≥80%<br><br>Variables: gender and drug formulation | 3 years             |
| Sicras-Mainar et al (2016) <sup>d,19</sup><br>Primary care medical databases; Spain<br>(2008–2013) | n=3094<br>Male: n≈1170 <sup>a</sup> (37.8%)<br>Female: n≈1924 <sup>a</sup> (62.2%)<br>Mean age: 54.0 years | Adults aged 20 to 64 with a first index (new) prescription of:<br>fesoterodine (n=859)<br>solifenacin (n=1330)<br>tolterodine (n=905)                     | Discontinuation was defined as when the patient switched to another active substance, another drug was added (combination) or the medication was discontinued completely or discontinued for ≥60 days without renewal and ≥2 prescriptions<br><br>Compliance was calculated using MPR<br><br>Variables: concomitant medication (antidepressants, antibiotics) and index drug         | 1 year              |

| Author (year) and country (database)                                                                                   | Participants                                                                                                                                                         | Drug/intervention*                                                                                                                     | Definition of persistence/adherence/discontinuation and independent variables on persistence                                                                                                                                                                                                                                                                                                                                                                               | Length of follow-up |
|------------------------------------------------------------------------------------------------------------------------|----------------------------------------------------------------------------------------------------------------------------------------------------------------------|----------------------------------------------------------------------------------------------------------------------------------------|----------------------------------------------------------------------------------------------------------------------------------------------------------------------------------------------------------------------------------------------------------------------------------------------------------------------------------------------------------------------------------------------------------------------------------------------------------------------------|---------------------|
| Sicras-Mainar et al (2015) <sup>d,20</sup><br>Primary care medical databases; Spain (2008–2013)                        | n=3094<br>Male: n≈1170 <sup>a</sup> (37.8%)<br>Female: n≈1924 <sup>a</sup> (62.2%)<br>Mean (SD) age: 54.0 (9.2) years                                                | Adults aged ≥20 years with a first index (new) prescription of:<br>fesoterodine (n=859)<br>solifenacin (n=1330)<br>tolterodine (n=905) | Persistence was defined as the time, measured in months, without stopping the initial treatment or switching to another medication at least 30 days after the initial prescription<br><br>Compliance was defined according to ISPOR criteria and was calculated based on the MPR, which was evaluated from the first to the last prescription and represented the number of days of medication taken over the number of days in treatment (commencing from the start date) | 1 year              |
| Sicras-Mainar et al (2014a) <sup>21</sup><br>Primary care medical databases; Spain (2008–2010)                         | n=552<br>Male: n≈272 <sup>a</sup> (49.2%)<br>Female: n≈280 <sup>a</sup> (50.8%)<br>Mean (SD) age: 80.2 (4.0) years                                                   | Adults aged ≥75 years with a first index (new) prescription of:<br>fesoterodine (n=58)<br>solifenacin (n=252)<br>tolterodine (n=212)   | Persistence was defined as the time, in weeks, with no drop-out from initial treatment or with no switch to another medication at least 30 days following initial prescription<br><br>Compliance was defined according to ISPOR criteria and was calculated based on the medication use/possession rate                                                                                                                                                                    | 1 year              |
| Sicras-Mainar et al (2014b) <sup>e,22</sup><br>Primary care medical databases; Spain (2008–2010)                       | n=1971<br>Male: n=821 (41.7%)<br>Female: n=1150 (58.3%)<br>Mean (SD) age: 70.1 (10.6) years                                                                          | Adults aged ≥18 years with a first index (new) prescription of:<br>fesoterodine (n=302)<br>solifenacin (n=952)<br>tolterodine (n=717)  | Discontinuation was defined by either the absence of prescription coverage for the initial therapy for the remainder of the 52-week follow-up period or a switch to an alternative antimuscarinic during this time-period<br><br>Variables: index drug                                                                                                                                                                                                                     | 1 year              |
| Sicras-Mainar et al (2013) <sup>e,23</sup><br>Primary care medical databases; Spain (2008–2010)                        | n=1971<br>Male: n=821 (41.7%)<br>Female: n=1150 (58.3%)<br>Mean (SD) age: 70.1 (10.6) years                                                                          | Adults aged ≥18 years with a first index (new) prescription of:<br>fesoterodine (n=302)<br>solifenacin (n=952)<br>tolterodine (n=717)  | Persistence was defined as patients who remained on treatment during the 52-week period following the index date<br><br>Compliance was defined according to ISPOR criteria and was calculated based on the MPR                                                                                                                                                                                                                                                             | 1 year              |
| Suehs et al (2016) <sup>24</sup><br>Medicare Advantage Prescription Plan - Administrative Claims Data; USA (2007–2013) | n=46 140 <sup>a</sup><br>Male: n=15 479 <sup>a</sup> (33.5%) <sup>a</sup><br>Female: n=30 661 <sup>a</sup> (66.5%) <sup>a</sup><br>Mean age: 75.5 years <sup>a</sup> | Adults aged 65 to 89 years <sup>f</sup> with a first index (new) prescription of any antimuscarinic OAB medication                     | Persistence was assessed as time in days from the index date to discontinuation of index antimuscarinic treatment<br><br>Adherence was assessed as PDC with the index OAB treatment over three predefined post index observation periods: 3, 6, and 12 months<br><br>Treatment discontinuation was identified using a permissible gap between refills of 15 days                                                                                                           | 1 year              |

| Author (year) and country (database)                                                                                           | Participants                                                                                                                                                                       | Drug/intervention*                                                                                                                                                                                                     | Definition of persistence/adherence/discontinuation and independent variables on persistence                                                                                                                                                                                                                                                                                                                                                         | Length of follow-up |
|--------------------------------------------------------------------------------------------------------------------------------|------------------------------------------------------------------------------------------------------------------------------------------------------------------------------------|------------------------------------------------------------------------------------------------------------------------------------------------------------------------------------------------------------------------|------------------------------------------------------------------------------------------------------------------------------------------------------------------------------------------------------------------------------------------------------------------------------------------------------------------------------------------------------------------------------------------------------------------------------------------------------|---------------------|
| Sussman et al (2017) <sup>25</sup><br>Truven MarketScan®<br>Claims Database; USA<br>(2012–2013)                                | n=71 980 <sup>a</sup><br>Male: n=21 225 <sup>a</sup> (29.5%) <sup>a</sup><br>Female: n=50 755 <sup>a</sup> (70.5%) <sup>a</sup><br>Mean age: 62.3 years <sup>a</sup>               | Adults aged ≥18 years with a prescription of:<br>mirabegron<br>any anticholinergic OAB medication                                                                                                                      | Persistence was measured by evaluating treatment failure (defined as either treatment discontinuation or treatment switching). A medication supply gap of ≥30 days was used to define treatment discontinuation<br><br>Adherence was defined as the PDC (ie, the number of days covered by the index therapy divided by the number of days between the index date and the end of the follow-up [365 days]). A PDC of <80% was considered nonadherent | 1 year              |
| Wagg et al (2012) <sup>26</sup><br>Prescription Database;<br>UK (2007–2008)                                                    | n=4833<br>Demographics were not explicitly reported, the majority of prescriptions appeared to be issued to patients aged ≥60 years                                                | Adults aged ≥40 years with a first index (new) prescription of:<br>darifenacin<br>flavoxate<br>oxybutynin ER<br>oxybutynin IR<br>propiverine<br>solifenacin<br>tolterodine ER<br>tolterodine IR<br>trospium            | Persistence was defined as the mean time [in days] until discontinuation (a gap in treatment exceeding 1.5 times than the length of the previous prescription without a refill)                                                                                                                                                                                                                                                                      | 1 year              |
| Wagg et al (2015) <sup>27</sup><br>Canadian National<br>Private Drug Plan<br>Database; Canada<br>(2013)                        | n=19 485<br>Male: n=4992 (25.6%) <sup>a</sup><br>Female: n=14 493 (74.3%) <sup>a</sup><br>Mean age not reported; the majority of patients (77.8%) <sup>a</sup> were aged ≥46 years | Adults aged ≥18 years with a first index (new) prescription of:<br>mirabegron (n=1683)<br>fesoterodine (n=1415)<br>oxybutynin ER (n=1260)<br>oxybutynin IR (n=5356)<br>solifenacin (n=6032)<br>tolterodine ER (n=3739) | Adherence was defined by the MPR over 1 year<br><br>To calculate time to end of persistence (defined by a gap in therapy of ≥30 days or switching to another medication), prescription claims for a target drug were tracked for 12 months after the index claim date<br><br>Variables: age, gender, treatment-naïve vs treatment-experienced, index antimuscarinic, number of coexisting medications                                                | 1 year              |
| Wagg et al (2015) <sup>28</sup><br>IMS Brogan public and<br>private prescription<br>claims databases;<br>Canada<br>(2007–2012) | n=31 707<br>Male: n=9395 (29.6%) <sup>a</sup><br>Female: n=22 312 (70.4%) <sup>a</sup><br>Mean age not reported                                                                    | Adult patients receiving a first index (new) prescription of:<br>oxybutynin IR<br>oxybutynin ER<br>tolterodine IR<br>tolterodine ER<br>solifenacin<br>darifenacin<br>trospium<br>flavoxate                             | Discontinuation was defined as patients experiencing a gap in therapy longer than 60 days                                                                                                                                                                                                                                                                                                                                                            | 4 years             |

| Author (year) and country (database)                                                                  | Participants                                                                                  | Drug/intervention*                                                                                                                                                                  | Definition of persistence/adherence/discontinuation and independent variables on persistence                                                                                                                                                                                                                                                                                                                                                                                                                                                                                                                                                                                                    | Length of follow-up |
|-------------------------------------------------------------------------------------------------------|-----------------------------------------------------------------------------------------------|-------------------------------------------------------------------------------------------------------------------------------------------------------------------------------------|-------------------------------------------------------------------------------------------------------------------------------------------------------------------------------------------------------------------------------------------------------------------------------------------------------------------------------------------------------------------------------------------------------------------------------------------------------------------------------------------------------------------------------------------------------------------------------------------------------------------------------------------------------------------------------------------------|---------------------|
| Yeaw et al (2009) <sup>29</sup><br>PharMetrics Patient-Centric Database (pharmacy claims); USA (2005) | n=7722<br>Male: n=1686 (21.8%)<br>Female: n=6036 (78.2%)<br>Mean (SD) age: 43.7 (18.3) years  | Adult patients receiving a first index (new) prescription of:<br>tolterodine<br>oxybutynin<br>solifenacin<br>darifenacin<br>trospium<br>bethanechol<br>flavoxate<br>hyoscyamine     | Persistence was calculated for the post-index period until the patient discontinued therapy, was lost to follow-up due to disenrollment from the health plan (minimum of 12 months), or the maximum 24-month follow-up period ended, whichever event occurred first. A patient was considered persistent until an excessive gap in days supplied occurred; refill gaps of 30, 60, and 90 days were used to calculate persistence for all cohorts<br><br>Adherence was measured using the PDC for each of the six drug class cohorts. This was calculated by taking patients' total days supplied of index class medications for the 360-day period following the index date and dividing by 360 | 2 years             |
| Yu et al (2015) <sup>30</sup><br>California Medi-Cal administrative files; USA (1999–2002)            | n=2496<br>Male: n=534 (21.4%)<br>Female: n=1962 (78.6%)<br>Mean (SD) age: 63.15 (16.14) years | Adult patients aged ≥18 years receiving a prescription of an OAB drug, including:<br>tolterodine (n=1093)<br>oxybutynin ER (n=524)<br>oxybutynin (n=812)<br>other OAB agents (n=67) | Persistence was measured by the length of continuous pharmacological treatment (patients discontinued their treatment if they failed to refill OAB/UI agents within 30 days after the expected end date of the previous prescription)<br><br>Patients who switched from one agent of OAB/UI drug to another within 30 days were considered persistent on therapy.<br><br>Adherence was defined as MPR over 181 days for the 6-month follow-up period<br><br>Variables: age, gender, ethnicity, index drug, OAB-associated comorbidities (UTIs), medication use history, length of hospital stay and number of drug classes prescribed                                                           | 1 year              |

COPD = chronic obstructive pulmonary disease; ER = extended release; ISPOR = International Society for Pharmacoeconomics and Outcomes Research; IR = immediate release; MPR = medication possession ratio (measured as the proportion of days with any OAB medication on hand, over the length of the evaluation period); OAB = overactive bladder; PDC = proportion of days covered; PIM = potentially inappropriate medication; SD = standard deviation; TD = transdermal; UA = urinary antispasmodic; UI = urinary incontinence; UTIs = urinary tract infections

\*The sum of the patients prescribed individual drugs may not match the total number of patients perhaps due to switching in some studies

<sup>a</sup>Calculated from data presented in the article; <sup>b</sup>used only in an OAB context; <sup>c</sup>26 922 continued, discontinued or restarted an OAB medication in the study period, but no demographics for this specific sub-group are reported; <sup>d</sup>Sicras-Mainar et al (2016)<sup>19</sup> and Sicras-Mainar et al (2015)<sup>20</sup> relate to the same patient group in terms of demographics and the timeframe/geographical source of adherence/persistence data; <sup>e</sup>Sicras-Mainar et al (2014)<sup>22</sup> and Sicras-Mainar et al (2013)<sup>23</sup> relate to the same patient group in terms of demographics and the timeframe/geographical source of adherence/persistence data; <sup>f</sup>this cohort was split into two groups – patients who were assigned OAB medication appropriately [non-PIM], or potentially inappropriately [PIM]. Inappropriateness was defined as patients having “drug–disease or syndrome interaction or indication of significant anticholinergic medication burden at the time of initiation of an antimuscarinic OAB treatment”



## References

1. Brostrom S, Hallas J: Persistence of antimuscarinic drug use. *Eur J Clin Pharmacol* 2009; **65**: 309.
2. Chancellor MB, Yehoshua A, Waweru C et al: Limitations of anticholinergic cycling in patients with overactive bladder (OAB) with urinary incontinence (UI): results from the CONsequences of Treatment Refractory Overactive bLadder (CONTROL) study. *Int Urol Nephrol* 2016; **48**: 1029.
3. Chapple CR, Nazir J, Hakimi Z et al: Persistence and adherence with mirabegron versus antimuscarinic agents in patients with overactive bladder: a retrospective observational study in UK clinical practice. *Eur Urol* 2017; **72**: 389.
4. D'Souza AO, Smith MJ, Miller LA et al: Persistence, adherence, and switch rates among extended-release and immediate-release overactive bladder medications in a regional managed care plan. *J Manag Care Pharm* 2008; **14**: 291.
5. Desgagne A, LeLorier J: Incontinence drug utilization patterns in Quebec, Canada. *Value Health* 1999; **2**: 452.
6. Gomes T, Juurlink DN, Mamdani MM: Comparative adherence to oxybutynin or tolterodine among older patients. *Eur J Clin Pharmacol* 2012; **68**: 97.
7. Gopal M, Haynes K, Bellamy SL et al: Discontinuation rates of anticholinergic medications used for the treatment of lower urinary tract symptoms. *Obstet Gynecol* 2008; **112**: 1311.
8. Ivanova JI, Hayes-Larson E, Sorg RA et al: Healthcare resource use and costs of privately insured patients who switch, discontinue, or persist on anti-muscarinic therapy for overactive bladder. *J Med Econ* 2014; **17**: 741.
9. Johnston S, Janning SW, Haas GP et al: Comparative persistence and adherence to overactive bladder medications in patients with and without diabetes. *Int J Clin Pract* 2012; **66**: 1042.
10. Kalder M, Pantazis K, Dinas K et al: Discontinuation of treatment using anticholinergic medications in patients with urinary incontinence. *Obstet Gynecol* 2014; **124**: 794.
11. Kleinman NL, Odell K, Chen CI et al: Persistence and adherence with urinary antispasmodic medications among employees and the impact of adherence on costs and absenteeism. *J Manag Care Spec Pharm* 2014; **20**: 1047.
12. Krhut J, Gartner M, Petzel M et al: Persistence with first line anticholinergic medication in treatment-naive overactive bladder patients. *Scand J Urol* 2014; **48**: 79.
13. Manack A, Motsko SP, Haag-Molkenteller C et al: Epidemiology and healthcare utilization of neurogenic bladder patients in a US claims database. *Neurourol Urodyn* 2011; **30**: 395.
14. Mauseth SA, Skurtveit S, Spigset O: Adherence, persistence and switch rates for anticholinergic drugs used for overactive bladder in women: data from the Norwegian Prescription Database. *Acta Obstet Gynecol Scand* 2013; **92**: 1208.
15. Nitti VM, Rovner ES, Franks B et al: Persistence with mirabegron versus tolterodine in patients with overactive bladder. *Am J Pharm Benefits* 2016; **8**: e25.
16. Pelletier EM, Vats V, Clemens JQ: Pharmacotherapy adherence and costs versus nonpharmacologic management in overactive bladder. *Am J Manag Care* 2009; **15**: S108.
17. Perfetto EM, Subedi P, Jumadilova Z: Treatment of overactive bladder: a model comparing extended-release formulations of tolterodine and oxybutynin. *Am J Manag Care* 2005; **11**: S150.
18. Sears CL, Lewis C, Noel K et al: Overactive bladder medication adherence when medication is free to patients. *J Urol* 2010; **183**: 1077.

19. Sicras-Mainar A, Navarro-Artieda R, Ruiz-Torrejon A et al: Persistence and concomitant medication in patients with overactive bladder treated with antimuscarinic agents in primary care. An observational baseline study. *Actas Urol Esp* 2016; **40**: 96.
20. Sicras-Mainar A, Navarro-Artieda R, Ruiz-Torrejon A et al: Impact of loss of work productivity in patients with overactive bladder treated with antimuscarinics in Spain: study in routine clinical practice conditions. *Clin Drug Investig* 2015; **35**: 795.
21. Sicras-Mainar A, Rejas-Gutierrez J, Navarro-Artieda R et al: Use of health care resources and associated costs in non-institutionalized vulnerable elders with overactive bladder treated with antimuscarinic agents in the usual medical practice. *Actas Urol Esp* 2014; **38**: 530.
22. Sicras-Mainar A, Rejas J, Navarro-Artieda R et al: Antimuscarinic persistence patterns in newly treated patients with overactive bladder: a retrospective comparative analysis. *Int Urogynecol J* 2014; **25**: 485.
23. Sicras-Mainar A, Rejas J, Navarro-Artieda R et al: Health economics perspective of fesoterodine, tolterodine or solifenacin as first-time therapy for overactive bladder syndrome in the primary care setting in Spain. *BMC Urol* 2013; **13**: 51.
24. Suehs BT, Davis C, Franks B et al: Effect of potentially inappropriate use of antimuscarinic medications on healthcare use and cost in individuals with overactive bladder. *J Am Geriatr Soc* 2016; **64**: 779.
25. Sussman D, Yehoshua A, Kowalski J et al: Adherence and persistence of mirabegron and anticholinergic therapies in patients with overactive bladder: a real-world claims data analysis. *Int J Clin Pract* 2017; **71**: e12824.
26. Wagg A, Compion G, Fahey A et al: Persistence with prescribed antimuscarinic therapy for overactive bladder: a UK experience. *BJU Int* 2012; **110**: 1767.
27. Wagg A, Franks B, Ramos B et al: Persistence and adherence with the new beta-3 receptor agonist, mirabegron, versus antimuscarinics in overactive bladder: early experience in Canada. *Can Urol Assoc J* 2015; **9**: 343.
28. Wagg A, Diles D, Berner T: Treatment patterns for patients on overactive bladder therapy: a retrospective statistical analysis using Canadian claims data. *JHEOR* 2015; **3**: 43.
29. Yeaw J, Benner JS, Walt JG et al: Comparing adherence and persistence across 6 chronic medication classes. *J Manag Care Pharm* 2009; **15**: 728.
30. Yu YF, Nichol MB, Yu AP et al: Persistence and adherence of medications for chronic overactive bladder/urinary incontinence in the California Medicaid program. *Value Health* 2005; **8**: 495.

**Supplemental Table 2.** Summary of adherence and persistence rates and determinants

| Author (year)                           | Persistence*                                                                                                                                                                                                                                                                                                                                                                                                                                                                                                                                               | Adherence*                                                                                                                                                                                                                                                                                                             | Determinants of persistence and adherence                                                                                                                                                                                           |
|-----------------------------------------|------------------------------------------------------------------------------------------------------------------------------------------------------------------------------------------------------------------------------------------------------------------------------------------------------------------------------------------------------------------------------------------------------------------------------------------------------------------------------------------------------------------------------------------------------------|------------------------------------------------------------------------------------------------------------------------------------------------------------------------------------------------------------------------------------------------------------------------------------------------------------------------|-------------------------------------------------------------------------------------------------------------------------------------------------------------------------------------------------------------------------------------|
| Brostrøm and Hallas (2009) <sup>1</sup> | <p>Proportion of patients continued (all drugs except trospium chloride):</p> <p>&lt;50% at 6 months</p> <p>&lt;25% at 1 year</p> <p>&lt;10% at ≥2 years</p> <p>Proportion of patients continued trospium:</p> <p>46% at 6 months</p> <p>36% at 1 year</p> <p>22% at 2 years</p> <p>16% at 3 years</p>                                                                                                                                                                                                                                                     | Not reported                                                                                                                                                                                                                                                                                                           | <p><b>Gender, age, medication dose, treatment status, medication type</b></p> <p>Retention was longer: in females; in older people; with higher doses; with previous experience of other OAB drugs; trospium vs other OAB drugs</p> |
| Chancellor et al (2013) <sup>2</sup>    | <p>Proportion of patients discontinued at 2 years:<sup>a</sup></p> <p>tolterodine ER: 84.7%</p> <p>solifenacin: 85.2%</p> <p>oxybutynin: 91.1%</p> <p>darifenacin: 85.7%</p> <p>oxybutynin ER: 84.0%</p> <p>tolterodine: 85.1%</p> <p>trospium: 88.1%</p> <p>trospium ER: 87.1%</p> <p>Proportion of patient switched at 2 years:<sup>a</sup></p> <p>tolterodine ER: 5.7%</p> <p>solifenacin: 5.2%</p> <p>oxybutynin: 4.7%</p> <p>darifenacin: 6.0%</p> <p>oxybutynin ER: 6.7%</p> <p>tolterodine: 9.7%</p> <p>trospium: 6.9%</p> <p>trospium ER: 6.4%</p> | <p>Proportion of patients with MPR ≥0.80 over study period (in those filling &gt;1 prescription):</p> <p>tolterodine ER: 51.1%</p> <p>solifenacin: 49.4%</p> <p>oxybutynin: 30.1%</p> <p>darifenacin: 51.9%</p> <p>oxybutynin ER: 51.8%</p> <p>tolterodine: 42.6%</p> <p>trospium: 42.4%</p> <p>trospium ER: 54.3%</p> | Not reported                                                                                                                                                                                                                        |

| Author (year)                     | Persistence*                                                                                                                                                                                                                                                                                                                                                                                                                                                                                                             | Adherence*                                                                                                                                                                                                                                                                                                                                                                                                                                                                                                                                                                                            | Determinants of persistence and adherence                                                                                                                                                                                                                                                                                                                                                                                                                                                                                       |
|-----------------------------------|--------------------------------------------------------------------------------------------------------------------------------------------------------------------------------------------------------------------------------------------------------------------------------------------------------------------------------------------------------------------------------------------------------------------------------------------------------------------------------------------------------------------------|-------------------------------------------------------------------------------------------------------------------------------------------------------------------------------------------------------------------------------------------------------------------------------------------------------------------------------------------------------------------------------------------------------------------------------------------------------------------------------------------------------------------------------------------------------------------------------------------------------|---------------------------------------------------------------------------------------------------------------------------------------------------------------------------------------------------------------------------------------------------------------------------------------------------------------------------------------------------------------------------------------------------------------------------------------------------------------------------------------------------------------------------------|
| Chapple et al (2017) <sup>3</sup> | Median time to discontinuation (days):<br>mirabegron: 169<br>darifenacin: 56<br>fesoterodine: 78<br>flavoxate: 30<br>oxybutynin ER: 60<br>oxybutynin IR: 35<br>propiverine: 56<br>solifenacin: 67<br>tolterodine ER: 56<br>trospium chloride: 60<br><br>Proportion of patients persistent at 1 year:<br>mirabegron: 38%<br>darifenacin: 16%<br>fesoterodine: 24%<br>flavoxate: 8.3%<br>oxybutynin ER: 17%<br>oxybutynin IR: 12%<br>propiverine: 21%<br>solifenacin: 25%<br>tolterodine ER: 21%<br>trospium chloride: 19% | Mean (SD) MPR at 1 year:<br>mirabegron: 0.59 (0.33)<br>darifenacin: 0.46 (0.34)<br>fesoterodine: 0.53 (0.33)<br>flavoxate: 0.44 (0.32)<br>oxybutynin ER: 0.49 (0.32)<br>oxybutynin IR: 0.41 (0.32)<br>propiverine: 0.51 (0.32)<br>solifenacin: 0.53 (0.34)<br>tolterodine ER: 0.50 (0.34)<br>trospium chloride: 0.48 (0.33)<br><br>Proportion of patients with MPR ≥0.8 at 1 year:<br>mirabegron: 43%<br>darifenacin: 29%<br>fesoterodine: 35%<br>flavoxate: 24%<br>oxybutynin ER: 31%<br>oxybutynin IR: 22%<br>propiverine: 25%<br>solifenacin: 35%<br>tolterodine ER: 32%<br>trospium chloride: 29% | <b>Medication type</b><br>Mirabegron was associated with a statistically significantly greater median time to discontinuation (adjusted HR range 1.31–2.31; p<0.0001 all comparisons) and 12-month persistence rates (adjusted OR range 0.18–0.71; p≤0.0001 all comparisons) vs antimuscarinics in all patients<br><br>The mean MPR with mirabegron was significantly greater vs antimuscarinics in all patients (p values 0.03 to <0.0001), and in treatment-naïve subcohorts, except for flavoxate (p values 0.02 to <0.0001) |

| Author (year)                      | Persistence*                                                                                                                                                                                                                                                                                                                                                                                                                                                                                                                                                                                                                                                         | Adherence*   | Determinants of persistence and adherence                                                                                                                                                                                                                                                                                                                                                                                                                                                                                                                                                                                                                                                |
|------------------------------------|----------------------------------------------------------------------------------------------------------------------------------------------------------------------------------------------------------------------------------------------------------------------------------------------------------------------------------------------------------------------------------------------------------------------------------------------------------------------------------------------------------------------------------------------------------------------------------------------------------------------------------------------------------------------|--------------|------------------------------------------------------------------------------------------------------------------------------------------------------------------------------------------------------------------------------------------------------------------------------------------------------------------------------------------------------------------------------------------------------------------------------------------------------------------------------------------------------------------------------------------------------------------------------------------------------------------------------------------------------------------------------------------|
| Desgagné et al (1999) <sup>4</sup> | <p>Proportion of patients refilled initial prescription:</p> <p>Short-term<sup>b</sup>;<br/>oxybutynin: 39.3%<br/>flavoxate: 36.6%</p> <p>Long-term<sup>c</sup>;<br/>oxybutynin: 63.9%<br/>flavoxate: 55.5%</p> <p>Proportion of patients discontinued at 3 months:<br/>oxybutynin: 78%<br/>flavoxate: 83%</p> <p>Proportion of patients discontinued at 6-months:<br/>oxybutynin: 89%<br/>flavoxate: 94%</p> <p>Proportion of patients switched at 4-years:</p> <p>Patients without renewal of the original claim:<br/>oxybutynin: 1.3%<br/>flavoxate: 3.1%</p> <p>Patients with any number of renewals before switch:<br/>oxybutynin: 2.2%<br/>flavoxate: 5.9%</p> | Not reported | <p><b>Age</b><br/>Compared with patients aged &lt;77.5 years, those who were older were less likely to discontinue vs:<br/>77.5–83.5 years: RR 0.90, 95% CI 0.85–0.96, p&lt;0.001<br/>&gt;83.5 years: RR 0.86, 95% CI 0.81–0.92, p&lt;0.001</p> <p><b>Medication dose</b><br/>Higher quantity of tablets per day (2–4 tablets/day) was associated with increased risk of early discontinuation, compared with low daily quantity (1 tablet per day) (RR 1.45, 95% CI 1.37–1.53, p&lt;0.001)</p> <p><b>Medication type</b><br/>Patients receiving flavoxate had an increased risk of discontinuation compared with those receiving oxybutynin (RR 1.13, 95% CI 1.05–1.22, p&lt;0.001)</p> |

| Author (year)                     | Persistence*                                                                                                                                                                                                                                                                                                                                                                                                                                                                                                                                                                                                                                                                                                                                                                               | Adherence*                                                                                                                                                                                                       | Determinants of persistence and adherence                                                                                                                                                                                                                                                                                                              |
|-----------------------------------|--------------------------------------------------------------------------------------------------------------------------------------------------------------------------------------------------------------------------------------------------------------------------------------------------------------------------------------------------------------------------------------------------------------------------------------------------------------------------------------------------------------------------------------------------------------------------------------------------------------------------------------------------------------------------------------------------------------------------------------------------------------------------------------------|------------------------------------------------------------------------------------------------------------------------------------------------------------------------------------------------------------------|--------------------------------------------------------------------------------------------------------------------------------------------------------------------------------------------------------------------------------------------------------------------------------------------------------------------------------------------------------|
| D'Souza et al (2008) <sup>5</sup> | <p>Proportion of patients persistent at 1 year (without a gap &gt;45 days):</p> <p>oxybutynin ER: 15.3%</p> <p>oxybutynin IR: 6.5%</p> <p>tolterodine ER: 15.0%</p> <p>tolterodine IR: 11.4%</p> <p>overall: 13.2%</p> <p>Proportion of patients not refilled index medication:</p> <p>oxybutynin ER: 39.4%</p> <p>oxybutynin IR: 59.3%</p> <p>tolterodine ER: 42.7%</p> <p>tolterodine IR: 46.1%</p> <p>overall: 44.5%</p> <p>Median time to discontinuation (days):</p> <p>oxybutynin ER: 34</p> <p>oxybutynin IR: 0</p> <p>tolterodine IR: 32</p> <p>tolterodine ER: 33</p> <p>overall: 31</p> <p>Proportion of patients switched at 1 year:</p> <p>oxybutynin ER: 16.5%</p> <p>oxybutynin IR: 19.4%</p> <p>tolterodine IR: 13.7%</p> <p>tolterodine ER: 9.9%</p> <p>overall: 13.3%</p> | <p>Proportion of patients with MPR <math>\geq 0.80</math> at 1 year:</p> <p>oxybutynin ER: 36.1%</p> <p>oxybutynin IR: 14.8%</p> <p>tolterodine ER: 35.2%</p> <p>tolterodine IR: 23.5%</p> <p>overall: 30.3%</p> | <p><b>Medication formulation</b></p> <p>Adherence with IR drugs approximately half that for ER drugs (OR 0.504, 95% CI 0.306–0.704, <math>p &lt; 0.001</math>)</p> <p><b>Age</b></p> <p>Patients aged <math>\geq 65</math> years were 1.5 times more likely to achieve an MPR <math>\geq 0.80</math> than patients aged <math>&lt; 65</math> years</p> |

| Author (year)                   | Persistence*                                                                                                                                                                                                                                                                                                                                                    | Adherence*   | Determinants of persistence and adherence                                                                                               |
|---------------------------------|-----------------------------------------------------------------------------------------------------------------------------------------------------------------------------------------------------------------------------------------------------------------------------------------------------------------------------------------------------------------|--------------|-----------------------------------------------------------------------------------------------------------------------------------------|
| Gomes et al (2012) <sup>6</sup> | Median time to discontinuation (days):<br>oxybutynin: 68<br>tolterodine: 128<br><br>Proportion of patients persistent at:<br>6 months<br>oxybutynin: 30.6%<br>tolterodine: 42.9%<br><br>1 year<br>oxybutynin: 18.9%<br>tolterodine: 27.3%<br><br>18 months<br>oxybutynin: 13.1%<br>tolterodine: 18.9%<br><br>2 years:<br>oxybutynin: 9.4%<br>tolterodine: 13.6% | Not reported | <b>Medication type</b><br>Over the 2-year follow-up, the time to discontinuation was longer with tolterodine than oxybutynin (p<0.0001) |

For peer review only

| Author (year)                   | Persistence*                                                                                                                                                                                                                                                                                                                                                                                                                                                                                                                                                                                                                                                                                                                                                                                                                                                                                                                                                                                                                                                                                                                                                                                                                       | Adherence*   | Determinants of persistence and adherence                                                                                                                                                                                                                                                                                                                                                                                                                                                                                                                                                                                                                                         |
|---------------------------------|------------------------------------------------------------------------------------------------------------------------------------------------------------------------------------------------------------------------------------------------------------------------------------------------------------------------------------------------------------------------------------------------------------------------------------------------------------------------------------------------------------------------------------------------------------------------------------------------------------------------------------------------------------------------------------------------------------------------------------------------------------------------------------------------------------------------------------------------------------------------------------------------------------------------------------------------------------------------------------------------------------------------------------------------------------------------------------------------------------------------------------------------------------------------------------------------------------------------------------|--------------|-----------------------------------------------------------------------------------------------------------------------------------------------------------------------------------------------------------------------------------------------------------------------------------------------------------------------------------------------------------------------------------------------------------------------------------------------------------------------------------------------------------------------------------------------------------------------------------------------------------------------------------------------------------------------------------|
| Gopal et al (2008) <sup>7</sup> | <p data-bbox="376 252 902 304">Over 3 years, 91% of 49,419 episodes of medication prescription resulted in discontinuation</p> <p data-bbox="376 331 902 408">Cumulative incidence of discontinuation at 6 months, 1 year, 2 years and 3 years (unadjusted):<br/>Overall: 58.8, 77.2, 87.5, 92.0%</p> <p data-bbox="376 435 902 775">Cumulative incidence of discontinuation, at 6 months, 1 year, 2 years and 3 years (adjusted for age, year of initiation, switch, number of previous drug classes, number of prior episodes and smoking status):<br/>oxybutynin: 71, 86, 94, 96%<br/>oxybutynin ER: 57, 80, 93, 97%<br/>tolterodine: 61, 81, 92, 95%<br/>tolterodine ER: 54, 76, 91, 97%<br/>trospium: 56, 80, 94, 98%<br/>propiverine: 61, 84, 95, 98%<br/>solifenacin: 53, 91, 98, 99%<br/>terodiline: 89, 99%, N/A, N/A<br/>flavoxate: 85, 96, 99, 99%</p> <p data-bbox="376 802 902 1094">Median time to discontinuation (months):<br/>oxybutynin: 4.67<br/>oxybutynin ER: 5.13<br/>tolterodine: 5.47<br/>tolterodine ER: 5.37<br/>trospium: 5.47<br/>propiverine: 5.43<br/>solifenacin: 5.00<br/>terodiline: 4.00<br/>flavoxate: 4.00<br/>overall: 4.76</p> <p data-bbox="376 1121 902 1142">Overall switch rate: 15%</p> | Not reported | <p data-bbox="1335 252 1998 276"><b>Medication formulation</b></p> <p data-bbox="1335 280 1998 357">In comparison with the multiple-dosing drug classes at 6 months, both oxybutynin ER (57%, 95% CI 55.1–59.2) and tolterodine ER (54%, 95% CI 52.3–57.4) had lower incidences of discontinuation</p> <p data-bbox="1335 384 1998 408"><b>Medication type</b></p> <p data-bbox="1335 413 1998 539">Trospium and tolterodine were associated with the longest median time to discontinuation (5.47 months each), followed by propiverine (5.43 months) and solifenacin (5.0 months). Terodiline and flavoxate had the shortest median time to discontinuation (4 months each)</p> |



| Author (year)                     | Persistence*                                                                                                                                                                                                                                                                                                                                                                                                                                                    | Adherence*   | Determinants of persistence and adherence                                                                                                                                                                                                                                                                                                                                                                                                                                                                                                                                                                                                                                                                                                                                                                                                                                                                                                                                                                                                                                                                                                                                                                                                                                                                                                                                                                                                                                                                                                                                                                   |
|-----------------------------------|-----------------------------------------------------------------------------------------------------------------------------------------------------------------------------------------------------------------------------------------------------------------------------------------------------------------------------------------------------------------------------------------------------------------------------------------------------------------|--------------|-------------------------------------------------------------------------------------------------------------------------------------------------------------------------------------------------------------------------------------------------------------------------------------------------------------------------------------------------------------------------------------------------------------------------------------------------------------------------------------------------------------------------------------------------------------------------------------------------------------------------------------------------------------------------------------------------------------------------------------------------------------------------------------------------------------------------------------------------------------------------------------------------------------------------------------------------------------------------------------------------------------------------------------------------------------------------------------------------------------------------------------------------------------------------------------------------------------------------------------------------------------------------------------------------------------------------------------------------------------------------------------------------------------------------------------------------------------------------------------------------------------------------------------------------------------------------------------------------------------|
| Ivanova et al (2014) <sup>8</sup> | Proportion of patients discontinued at 6 months: 61.0%<br>Proportion of patients switched at 6 months: 8.0%<br>Proportion of patients persistent at 6 months: 31.0%<br>Proportion of patients discontinued at 6 months:<br>oxybutynin: 30.6%<br>tolterodine: 30.5%<br>solifenacin: 24.5%<br>darifenacin: 8.4%<br>trospium: 4.1%<br>fesoterodine: 1.9%<br>Mean time to discontinuation: 54.7 days<br>42.7% of patients never refilled their indexed prescription | Not reported | <p><b>Age</b><br/>           Patients who discontinued (50.5 years) or switched (52.6 years) medication were significantly younger than those who persisted (53.4 years; <math>p &lt; 0.001</math>)</p> <p>Increasing age was associated with reduced odds of discontinuation (adjusted OR 0.97, 95% CI 0.96–0.97, <math>p &lt; 0.0001</math>)</p> <p><b>Gender</b><br/>           Being male was associated with greater odds of discontinuation (adjusted OR 1.11, 95% CI 1.00–1.23, <math>p = 0.0475</math>)</p> <p><b>Medication type</b><br/>           Patients who persisted with medication contained a significantly higher proportion of solifenacin users than those in groups who switched or discontinued (30.1% vs 19.7% vs 24.5%, respectively, <math>p &lt; 0.001</math>) and a lower proportion of oxybutynin (22.6% vs 29.6% vs 30.6%, respectively, <math>p &lt; 0.001</math>)</p> <p>Compared to patients treated with solifenacin, patients were significantly more likely to discontinue when treated with tolterodine (adjusted OR 1.30, 95% CI 1.16–1.45, <math>p &lt; 0.0001</math>) or oxybutynin (adjusted OR 1.80, 95% CI 1.59–2.03, <math>p &lt; 0.0001</math>)</p> <p><b>Presence of infection</b><br/>           Patients with UTI were more likely to discontinue compared with those without UTI (adjusted OR 1.31, 95% CI 1.19–1.45, <math>p &lt; 0.0001</math>)</p> <p><b>Financial burden</b><br/>           Patients with lower log of baseline OAB-related costs were more likely to discontinue (adjusted OR 0.96, 95% CI 0.94–0.98, <math>p &lt; 0.0001</math>)</p> |

| Author (year)                      | Persistence*                                                                                                                                                                                                                        | Adherence*                                                                            | Determinants of persistence and adherence                                                                                                                                                                                                                                                                                                                                                                                                                                                                                                                                            |
|------------------------------------|-------------------------------------------------------------------------------------------------------------------------------------------------------------------------------------------------------------------------------------|---------------------------------------------------------------------------------------|--------------------------------------------------------------------------------------------------------------------------------------------------------------------------------------------------------------------------------------------------------------------------------------------------------------------------------------------------------------------------------------------------------------------------------------------------------------------------------------------------------------------------------------------------------------------------------------|
| Johnston et al (2012) <sup>9</sup> | Mean time of continuation at 1 year (days):<br>diabetic: 164<br>not diabetic: 146.9<br>(p<0.001 difference)<br><br>Proportion of patients discontinued at 1 year:<br>diabetic: 71.5%<br>not diabetic: 76.2%<br>(p<0.001 difference) | Mean MPR at 1 year;<br>diabetic: 0.473<br>not diabetic: 0.424<br>(p<0.001 difference) | <p><b>Age and gender</b><br/>           The odds of adherence generally increase with age, and females had higher odds of adherence than men</p> <p><b>Diabetes</b><br/>           The diabetes cohort had greater odds of achieving an MPR <math>\geq 0.80</math> (OR 1.215, 95% CI 1.169–1.263, p&lt;0.0001) vs non-diabetes cohort during the 12-month evaluation period</p> <p>The diabetes cohort had greater odds of filling a second OAB medication prescription (OR 1.166, 95% CI 1.127–1.205, p&lt;0.0001) vs non-diabetes cohort during the 12-month evaluation period</p> |

For peer review only

| Author (year)                     | Persistence*                                                                               | Adherence*   | Determinants of persistence and adherence                                                                                                                                                                                                                                                                                                                                                                                                                                                                                                                                                                                                                                                                                                                                                                                                                                                                                                                                                                                                                                                                                                                                                                                                                                                                                                                                                                                                                     |
|-----------------------------------|--------------------------------------------------------------------------------------------|--------------|---------------------------------------------------------------------------------------------------------------------------------------------------------------------------------------------------------------------------------------------------------------------------------------------------------------------------------------------------------------------------------------------------------------------------------------------------------------------------------------------------------------------------------------------------------------------------------------------------------------------------------------------------------------------------------------------------------------------------------------------------------------------------------------------------------------------------------------------------------------------------------------------------------------------------------------------------------------------------------------------------------------------------------------------------------------------------------------------------------------------------------------------------------------------------------------------------------------------------------------------------------------------------------------------------------------------------------------------------------------------------------------------------------------------------------------------------------------|
| Kalder et al (2014) <sup>10</sup> | Proportion of patients discontinued at:<br>1 year: 74.8%<br>2 years: 77.6%<br>3 years: 87% | Not reported | <p><b>Gender</b><br/>At 3 years, there was a significantly higher risk of discontinuation in male than female patients (HR 1.14, 95% CI 1.11–1.18, p&lt;0.001)</p> <p><b>Age</b><br/>Discontinuation was higher in younger patients than older patients:<br/>≤60 years: 89.7%<br/>61–70 years: 87.9%<br/>71–80 years: 86.8%<br/>&gt;80 years: 83.0%</p> <p><b>Prescriber's profession</b><br/>Discontinuation rate was higher in patients treated by gynecologists and general practitioners compared with urologists (HR 1.60 [95% CI 1.52–1.67] p&lt;0.001; HR 1.24 [95% CI 1.20–1.29] p&lt;0.001)</p> <p><b>Side effects</b><br/>A higher risk of discontinuation in patients experiencing side effects:<br/>headache: HR 1.27, 95% CI 1.12–1.43, p=0.002<br/>stomach upset: HR 1.20, 95% CI 1.12–1.27, p&lt;0.001<br/>glaucoma: HR 1.46, 95% CI 1.16–1.84, p&lt;0.001</p> <p><b>Medication type</b><br/>Patients using propiverine (HR 0.94, 95% CI 0.88–0.99, p=0.022) or solifenacin (HR 0.93, 95% CI 0.87–0.98, p=0.003) had a significantly lower risk of treatment discontinuation compared with oxybutynin. However, the absolute difference was relatively small</p> <p><b>Comorbidities</b><br/>Diabetes, Parkinson's disease, epilepsy, dementia, and multiple sclerosis was associated with a lowered risk of treatment discontinuation</p> <p>A prior diagnosis of migraine was associated with a higher risk of treatment discontinuation</p> |

| Author (year)                       | Persistence*                                                                                                                                                                                                                                                                                      | Adherence*                                                                                                                                                    | Determinants of persistence and adherence                                                                                                                                                                                                                                                                                                                                                                                                                                                                                                                                                                                                                                                                                                                                                                                                                                                                                                                                               |
|-------------------------------------|---------------------------------------------------------------------------------------------------------------------------------------------------------------------------------------------------------------------------------------------------------------------------------------------------|---------------------------------------------------------------------------------------------------------------------------------------------------------------|-----------------------------------------------------------------------------------------------------------------------------------------------------------------------------------------------------------------------------------------------------------------------------------------------------------------------------------------------------------------------------------------------------------------------------------------------------------------------------------------------------------------------------------------------------------------------------------------------------------------------------------------------------------------------------------------------------------------------------------------------------------------------------------------------------------------------------------------------------------------------------------------------------------------------------------------------------------------------------------------|
| Kleinman et al (2014) <sup>11</sup> | <p>Median time until a <math>\geq 30</math>-day medication gap: 64 days</p> <p>Proportion of patients persistent:<br/>beyond 1 month: 70%<br/>at 9 months: 10%<br/>at 1 year: 5%</p>                                                                                                              | <p>Proportion of patients with PDC <math>\leq 10\%</math> at 1 year: 45.4%</p> <p>Proportion of patients with PDC <math>\geq 80\%</math> at 1 year: 12.7%</p> | <p><b>Gender</b><br/>Compared to the group with PDC <math>\geq 80\%</math>, the group with PDC <math>&lt; 80\%</math> contained a lower proportion of females (69.5% vs 76.3%, <math>p=0.006</math>)</p> <p><b>Age</b><br/>Compared to those with PDC <math>\geq 80\%</math>, patients with PDC <math>&lt; 80\%</math> were younger (mean age: 46.18 years vs 49.79 years, <math>p&lt;0.001</math>)</p> <p><b>Race</b><br/>Compared to the group with a PDC <math>\geq 80\%</math>, the group with PDC <math>&lt; 80\%</math> contained a lower proportion of White patients (38.6% vs 50.0%, <math>p&lt;0.001</math>) and higher proportion of Black and Hispanic patients (6.7% vs 3.7%, <math>p=0.025</math>; 11.6% vs 6.3%, <math>p=0.002</math>)</p> <p><b>Medication co-payment</b><br/>Compared to the group with a PDC <math>\geq 80\%</math>, those with PDC <math>&lt; 80\%</math> paid a higher mean medication co-payment (\$20.15 vs \$14.68, <math>p&lt;0.001</math>)</p> |
| Krhut et al (2014) <sup>12</sup>    | <p>Median (SD) time to discontinuation: 6.53 (3.84) months</p> <p>Proportion of patients persistent at:<br/>3 months: 59.7%<br/>6 months: 39.3%<br/>9 months: 33.6%<br/>1 year: 27.2%</p>                                                                                                         | Not reported                                                                                                                                                  | <p><b>Medication type</b><br/>Persistence was significantly higher in patients treated with anticholinergic medication with an ER formulation than in patients treated with IR anticholinergics (ER: 7.10 [SD 3.90] months vs IR: 6.18 [SD 3.75] months, <math>p=0.023</math>)</p>                                                                                                                                                                                                                                                                                                                                                                                                                                                                                                                                                                                                                                                                                                      |
| Manack et al (2011) <sup>13</sup>   | <p>Mean (SD) duration of therapy: 201.9 (120.9) days</p> <p>Proportion of patients that:<br/>continued OAB medication <math>\geq 1</math> year: 28.9%<br/>discontinued OAB medication and did not restart<sup>d</sup>: 37.5%<br/>discontinued and restarted OAB medication<sup>e</sup>: 33.5%</p> | Not reported                                                                                                                                                  | Not reported                                                                                                                                                                                                                                                                                                                                                                                                                                                                                                                                                                                                                                                                                                                                                                                                                                                                                                                                                                            |

| Author (year)                        | Persistence*                                                                                                                                                                                                                                                                                                                      | Adherence*                                                                                                                                                                                                                             | Determinants of persistence and adherence                                                                                                                                                                                                                                                                                                                                                                                                                                                                                                                                                                                                                                                                                                                                                       |
|--------------------------------------|-----------------------------------------------------------------------------------------------------------------------------------------------------------------------------------------------------------------------------------------------------------------------------------------------------------------------------------|----------------------------------------------------------------------------------------------------------------------------------------------------------------------------------------------------------------------------------------|-------------------------------------------------------------------------------------------------------------------------------------------------------------------------------------------------------------------------------------------------------------------------------------------------------------------------------------------------------------------------------------------------------------------------------------------------------------------------------------------------------------------------------------------------------------------------------------------------------------------------------------------------------------------------------------------------------------------------------------------------------------------------------------------------|
| Mauseth et al (2013) <sup>14</sup>   | <p>Proportion of patients persistent at 1 year:<br/>tolterodine: 39.0%<br/>solifenacin: 39.4%<br/>darifenacin: 34.3%<br/>fesoterodine: 29.1%<br/>overall: 38.0%</p> <p>Proportion of patients switched at 1 year:<br/>tolterodine: 12.0%<br/>overall: 10.3%</p> <p>Proportion of patients filled only one prescription: 31.9%</p> | <p>Mean MPR at 1 year: 0.62<sup>f</sup></p> <p>Proportion of patients with MPR <math>\geq 0.80^f</math> at 1 year:<br/>tolterodine: 33.7%<br/>solifenacin: 35.7%<br/>darifenacin: 37.0%<br/>fesoterodine: 38.5%<br/>overall: 35.2%</p> | <p><b>Age</b><br/>Persistence was lowest in the age group 18–39 years (20.9%), generally increased with age, and was highest in the age groups 70–79 years (43.5%) and <math>\geq 80</math> years (43.3%)</p> <p><b>Medication type</b><br/>At 1 year, persistence was highest for tolterodine (39.0%) and solifenacin (39.4%), both of which entered the market first. Persistence for darifenacin and fesoterodine, which were launched later, was 34.3% and 29.1%, respectively</p>                                                                                                                                                                                                                                                                                                          |
| Nitti et al (2016) <sup>15</sup>     | <p>Proportion of patients persistent at:<br/>1 month;<br/>mirabegron: 68.4%<br/>tolterodine ER: 47.1%</p> <p>3 months;<br/>mirabegron: 48.7%<br/>tolterodine ER: 28.6%</p> <p>6 months;<br/>mirabegron: 34.7%<br/>tolterodine ER: 18.5%</p> <p>Median persistence (days):<br/>mirabegron: 170<br/>tolterodine ER: 90</p>          | Not reported                                                                                                                                                                                                                           | <p><b>Age</b><br/>Compared with patients aged &lt;65 years, patients aged <math>\geq 65</math> years were less likely to discontinue over 6 months with tolterodine (HR 0.88, 95% CI 0.80–0.96, <math>p=0.0064</math>) and mirabegron (HR 0.68, 95% CI 0.52–0.90, <math>p=0.0068</math>)</p> <p><b>Prior treatment</b><br/>Compared to patients without prior use of OAB medication, patients with prior OAB medication use were less likely to discontinue over 6 months with tolterodine (HR 0.76, 95% CI 0.68–0.85), <math>p&lt;0.0001</math>) and mirabegron (HR 0.68, 95% CI 0.53–0.88, <math>p=0.0025</math>)</p> <p><b>Medication type</b><br/>The risk of discontinuation was lower with mirabegron compared with tolterodine (HR 0.72, 95% CI 0.61–0.85, <math>p&lt;0.0001</math>)</p> |
| Pelletier et al (2009) <sup>16</sup> | Not reported                                                                                                                                                                                                                                                                                                                      | <p>Mean cohort PDC at 1 year: 0.32</p> <p>Proportion of patients with PDC <math>\geq 0.80</math> at 1 year: 14.4%</p>                                                                                                                  | <p><b>Demographics (gender, age, comorbidities)<sup>g</sup></b><br/>Female and older subjects were more likely to adhere. Those with a history of hypertension, diabetes, or multiple sclerosis were more adherent. Subjects with COPD were less adherent</p>                                                                                                                                                                                                                                                                                                                                                                                                                                                                                                                                   |

| Author (year)                       | Persistence*                                                                                                                                                                                                                                                                                                                                                                                                                      | Adherence*                                                                                                                                                                                                                                                                                                                                     | Determinants of persistence and adherence                                                                                                                                                                                                                                                                                                                                                                                                                                                                                                                                                                                                                                                      |
|-------------------------------------|-----------------------------------------------------------------------------------------------------------------------------------------------------------------------------------------------------------------------------------------------------------------------------------------------------------------------------------------------------------------------------------------------------------------------------------|------------------------------------------------------------------------------------------------------------------------------------------------------------------------------------------------------------------------------------------------------------------------------------------------------------------------------------------------|------------------------------------------------------------------------------------------------------------------------------------------------------------------------------------------------------------------------------------------------------------------------------------------------------------------------------------------------------------------------------------------------------------------------------------------------------------------------------------------------------------------------------------------------------------------------------------------------------------------------------------------------------------------------------------------------|
| Perfetto et al (2005) <sup>17</sup> | <p>Cumulative discontinuation rates at:</p> <p>1 month;<br/>tolterodine ER: 6%<br/>oxybutynin ER: 11%</p> <p>3 months;<br/>tolterodine ER: 55%<br/>oxybutynin ER: 62%</p> <p>6 months;<br/>tolterodine ER: 69%<br/>oxybutynin ER: 76%</p> <p>11 months;<br/>tolterodine ER: 79%<br/>oxybutynin ER: 85%</p> <p>Overall, at 11 months, 21% of patients remained on tolterodine ER and 15% of patients remained on oxybutynin ER</p> | Not reported                                                                                                                                                                                                                                                                                                                                   | Not reported                                                                                                                                                                                                                                                                                                                                                                                                                                                                                                                                                                                                                                                                                   |
| Sears et al (2010) <sup>18</sup>    | <p>Proportion of patients without prescription refills over 3 years: 35.1%</p> <p>Median persistence (days):<br/>overall: 273<br/>patients with at least 1 refill: 582</p> <p>Overall medication persistence duration was 273 days when all cases were analyzed and 582 days when those with at least 1 refill were analyzed</p>                                                                                                  | <p>Median MPR at 3 years:<br/>oxybutynin 5 mg IR: 0.68<br/>oxybutynin 5 mg ER: 0.83<br/>oxybutynin 10 mg ER: 0.84<br/>tolterodine 1 mg IR: 0.71<br/>tolterodine 2 mg IR: 0.73<br/>tolterodine 2 mg ER: 0.88<br/>tolterodine 4 mg ER: 0.89<br/>overall: 0.82</p> <p>Proportion of patients with MPR <math>\geq</math>0.80 at 3 years: 34.0%</p> | <p><b>Gender</b><br/>Male patients had a higher median MPR than female patients (0.86 vs 0.81, <math>p &lt; 0.001</math>)</p> <p>Medication adherence was higher in males than in females (0.370 vs 0.328, <math>p &lt; 0.001</math>)</p> <p>Of patients refilling their prescription at least once, the median number of days persisted was longer in females than in males (606.0 days vs 547.0 days, <math>p = 0.01</math>)</p> <p><b>Medication type</b><br/>Of patients refilling their prescription at least once, median medication persistence was longest in 5 mg oxybutynin IR (634 days, 95% CI 596.1–671.9) and lowest with 10 mg oxybutynin ER (504 days, 95% CI 137.0–871.0)</p> |

| Author (year)                              | Persistence*                                                                                                                                                                                                                                                                                                                                                          | Adherence*                                                                                                          | Determinants of persistence and adherence                                                                                                                                                                                                                                       |
|--------------------------------------------|-----------------------------------------------------------------------------------------------------------------------------------------------------------------------------------------------------------------------------------------------------------------------------------------------------------------------------------------------------------------------|---------------------------------------------------------------------------------------------------------------------|---------------------------------------------------------------------------------------------------------------------------------------------------------------------------------------------------------------------------------------------------------------------------------|
| Sicras-Mainar et al (2016) <sup>19</sup>   | <p>Proportion of patients persistent (without switching or experiencing a gap of &gt;60 days) at:</p> <p>6 months;<br/>fesoterodine: 71.4%<br/>solifenacin: 67.1%<br/>tolterodine: 64.8%</p> <p>1 year;<br/>fesoterodine: 40.2%<br/>solifenacin: 34.7%<br/>tolterodine: 33.6%</p>                                                                                     | <p>Mean MPR at 1 year was: 0.880, 0.877 or 0.875, depending upon geographical location</p>                          | <p><b>Medication type</b><br/>Persistence at 6 months and 1 year was statistically significantly higher with fesoterodine than solifenacin and tolterodine (p&lt;0.05).</p> <p>Persistence at 1 year was significantly lower with solifenacin than fesoterodine (p&lt;0.01)</p> |
| Sicras-Mainar et al (2015) <sup>1,20</sup> | <p>Proportion of patients persistent at:</p> <p>3 months: 86.2%<br/>6 months: 67.6%<br/>9 months: 48.4%<br/>1 year: 35.9%</p> <p>Mean (SD) treatment duration (without stopping, switching or a gap &gt;30 days):<br/>fesoterodine: 8.1<br/>solifenacin: 7.8<br/>tolterodine: 7.7<br/>overall: 7.9</p>                                                                | <p>Mean MPR at 1 year:<br/>fesoterodine: 0.900<br/>solifenacin: 0.870<br/>tolterodine: 0.861<br/>overall: 0.877</p> | <p>Not reported</p>                                                                                                                                                                                                                                                             |
| Sicras-Mainar et al (2014) <sup>21</sup>   | <p>Proportion of patients persistent (without switching or experiencing a gap of &gt;30 days):</p> <p>3 months;<br/>fesoterodine: 94.8%<br/>solifenacin: 76.2%<br/>tolterodine: 70.8%</p> <p>6 months;<br/>fesoterodine: 70.7%<br/>solifenacin: 59.5%<br/>tolterodine: 57.1%</p> <p>1 year;<br/>fesoterodine: 46.6%<br/>solifenacin: 36.5%<br/>tolterodine: 33.5%</p> | <p>Mean MPR at 1 year:<br/>fesoterodine: 0.907<br/>solifenacin: 0.935<br/>tolterodine: 0.936</p>                    | <p><b>Medication type</b><br/>At 3 months, persistence was higher with fesoterodine than with tolterodine and solifenacin</p>                                                                                                                                                   |

| Author (year)                              | Persistence*                                                                                                                                                                                                                                                                                                                                                                                                                                                            | Adherence*                                                                                                                                                                                                                                                                                                                                                                                                  | Determinants of persistence and adherence                                                                                                                                                                                                                                                                                                                                                                                    |
|--------------------------------------------|-------------------------------------------------------------------------------------------------------------------------------------------------------------------------------------------------------------------------------------------------------------------------------------------------------------------------------------------------------------------------------------------------------------------------------------------------------------------------|-------------------------------------------------------------------------------------------------------------------------------------------------------------------------------------------------------------------------------------------------------------------------------------------------------------------------------------------------------------------------------------------------------------|------------------------------------------------------------------------------------------------------------------------------------------------------------------------------------------------------------------------------------------------------------------------------------------------------------------------------------------------------------------------------------------------------------------------------|
| Sicras-Mainar et al (2014) <sup>9,22</sup> | Proportion of patients persistent at 1 year:<br>fesoterodine: 35.8%<br>solifenacin: 31.9%<br>tolterodine: 30.9%                                                                                                                                                                                                                                                                                                                                                         | Mean MPR at 1 year:<br>fesoterodine: 0.937<br>solifenacin: 0.948<br>tolterodine: 0.935                                                                                                                                                                                                                                                                                                                      | <b>Medication type</b><br>The mean duration of treatment was numerically higher with fesoterodine compared to solifenacin and tolterodine, but no statistical between-medication differences were found. However, adjusted HRs for remaining on treatment at 1 year significantly favored fesoterodine compared with solifenacin (HR 1.24 [95% CI 1.05–1.47]; p=0.011) and tolterodine (HR 1.28 [95% CI 1.07–1.52]; p=0.006) |
| Sicras-Mainar et al (2013) <sup>9,23</sup> |                                                                                                                                                                                                                                                                                                                                                                                                                                                                         | Mean MPR at 1 year:<br>fesoterodine: 0.945<br>solifenacin: 0.954<br>tolterodine: 0.946                                                                                                                                                                                                                                                                                                                      | <b>Medication type</b><br>The mean duration of treatment was numerically higher with fesoterodine compared to solifenacin and tolterodine, but no statistical between-medication differences were found                                                                                                                                                                                                                      |
| Suehs et al (2016) <sup>24</sup>           | Proportion of patients not refilling their index medication:<br>PIM: 41.4%<br>Non-PIM: 47.8%<br>(p<0.01)<br><br>Mean number of days persistent (before discontinuation or experiencing a gap >15 days):<br>PIM: 87.6<br>Non-PIM: 80.9<br>(p<0.001)<br><br>Proportion of patients persistent at:<br>3 months;<br>PIM: 23.9%<br>Non-PIM: 20.3%<br><br>6 months;<br>PIM: 13.2%<br>Non-PIM: 11.4%<br><br>1 year;<br>PIM: 5.1%<br>Non-PIM: 4.5%<br>(all p<0.001 differences) | Mean PDC at:<br>3 months;<br>PIM: 0.62<br>Non-PIM: 0.59<br><br>6 months;<br>PIM: 0.45<br>Non-PIM: 0.42<br><br>1 year;<br>PIM: 0.32<br>Non-PIM: 0.30<br>(all p<0.001 differences)<br><br>Proportion of patients with<br>PDC ≥0.80:<br>3 months;<br>PIM: 37.0%<br>Non-PIM: 35.0%<br><br>6 months;<br>PIM: 23.3%<br>Non-PIM: 19.7%<br><br>1 year;<br>PIM: 12.7%<br>Non-PIM: 10.7%<br>(all p<0.001 differences) | <b>Medication use appropriateness</b><br>At 1 year, there was no statistical difference between PIM status and OAB treatment discontinuation in the multivariable adjusted model based on the primary analysis definition (15-day definition OR 0.977, 95% CI 0.891–1.072, p=0.63; 30-day definition OR 0.939, 95% CI 0.871–1.013, p=0.10)                                                                                   |



| Author (year)                      | Persistence*                                                                                                                                                                                                  | Adherence*                                                                                                                                                          | Determinants of persistence and adherence                                                                                                    |
|------------------------------------|---------------------------------------------------------------------------------------------------------------------------------------------------------------------------------------------------------------|---------------------------------------------------------------------------------------------------------------------------------------------------------------------|----------------------------------------------------------------------------------------------------------------------------------------------|
| Sussman et al (2017) <sup>25</sup> | Proportion of patients discontinued at 1 year (gap of $\geq 30$ days):<br>mirabegron: 67.1%<br>anticholinergic: 84.1%<br><br>Median time to discontinuation (days):<br>mirabegron: 131<br>anticholinergic: 30 | Mean PDC:<br>mirabegron: 0.66<br>anticholinergic: 0.55<br><br>Proportion of patients with PDC $\geq 0.80$ at 1 year:<br>mirabegron: 43.6%<br>anticholinergic: 30.9% | <b>Medication type</b><br>Users of mirabegron appeared to achieve greater persistence and adherence at 1 year than users of anticholinergics |

For peer review only

| Author (year)                   | Persistence*                                                                                                                                                                                                                                                                                                                                                                                                                                                                                                                                                                                                                                                                                                                                                                                                                                                                                                                                                                                                                                                                                                                                                                                                                                                                                                                                                                                                                                                                                                                        | Adherence*   | Determinants of persistence and adherence                                                                                                                                                                                                                                                                                  |
|---------------------------------|-------------------------------------------------------------------------------------------------------------------------------------------------------------------------------------------------------------------------------------------------------------------------------------------------------------------------------------------------------------------------------------------------------------------------------------------------------------------------------------------------------------------------------------------------------------------------------------------------------------------------------------------------------------------------------------------------------------------------------------------------------------------------------------------------------------------------------------------------------------------------------------------------------------------------------------------------------------------------------------------------------------------------------------------------------------------------------------------------------------------------------------------------------------------------------------------------------------------------------------------------------------------------------------------------------------------------------------------------------------------------------------------------------------------------------------------------------------------------------------------------------------------------------------|--------------|----------------------------------------------------------------------------------------------------------------------------------------------------------------------------------------------------------------------------------------------------------------------------------------------------------------------------|
| Wagg et al (2012) <sup>26</sup> | <p>Time (days) to discontinuation (or a gap &gt;1.5 times the length of the previous prescription without a refill):</p> <p>darifenacin: 135.9<br/>           flavoxate: 77.4<br/>           oxybutynin ER: 146.7<br/>           oxybutynin IR: 119.3<br/>           propiverine: 141.1<br/>           solifenacin: 158.7 (5 mg); 216.0 (10 mg)<br/>           tolterodine ER: 156.7<br/>           tolterodine IR: 151.7<br/>           trospium: 138.5</p> <p>Proportion of patients persistent at 3 months:</p> <p>darifenacin: 52%<br/>           flavoxate: 28%<br/>           oxybutynin ER: 44%<br/>           oxybutynin IR: 40%<br/>           propiverine: 47%<br/>           solifenacin: 58%<br/>           tolterodine ER: 47%<br/>           tolterodine IR: 46%<br/>           trospium: 42%</p> <p>Proportion of patients persistent at 6 months:</p> <p>darifenacin: 30%<br/>           flavoxate: 16%<br/>           oxybutynin ER: 35%<br/>           oxybutynin IR: 29%<br/>           propiverine: 36%<br/>           solifenacin: 46%<br/>           tolterodine ER: 36%<br/>           tolterodine IR: 33%<br/>           trospium: 33%</p> <p>Proportion of patients persistent at 1 year:</p> <p>darifenacin: 17.4%<br/>           flavoxate: 13.5%<br/>           oxybutynin ER: 26.1%<br/>           oxybutynin IR: 21.7%<br/>           propiverine: 26.8%<br/>           solifenacin: 35%<br/>           tolterodine ER: 28.2%<br/>           tolterodine IR: 24.1%<br/>           trospium: 25.9%</p> | Not reported | <p><b>Age</b><br/>           Over 1 year, the majority of patients aged ≥60 years were more likely to persist than younger patients. Graphical results only</p> <p><b>Medication type</b><br/>           Patients receiving solifenacin spent the longest mean duration on therapy compared with other OAB medications</p> |

| Author (year)                   | Persistence*                                                                                                                                                                                                                                                                                                                                                                                                                                                                                                                                                                                                                                                               | Adherence*                                                                                                                                                                       | Determinants of persistence and adherence                                                                                                                                                                                                                                                                                                                                                                                                                                                                                                                                                                                                                                                                                       |
|---------------------------------|----------------------------------------------------------------------------------------------------------------------------------------------------------------------------------------------------------------------------------------------------------------------------------------------------------------------------------------------------------------------------------------------------------------------------------------------------------------------------------------------------------------------------------------------------------------------------------------------------------------------------------------------------------------------------|----------------------------------------------------------------------------------------------------------------------------------------------------------------------------------|---------------------------------------------------------------------------------------------------------------------------------------------------------------------------------------------------------------------------------------------------------------------------------------------------------------------------------------------------------------------------------------------------------------------------------------------------------------------------------------------------------------------------------------------------------------------------------------------------------------------------------------------------------------------------------------------------------------------------------|
| Wagg et al (2015) <sup>27</sup> | <p>Proportion of patients persistent at 1 year (without switching or experiencing a gap <math>\geq 30</math> days):</p> <p>mirabegron: 31.7%<br/>fesoterodine: 21.0%<br/>oxybutynin ER: 18.9%<br/>oxybutynin IR: 13.8%<br/>solifenacin: 22.0%<br/>tolterodine ER: 19.7%</p> <p>Median duration of treatment (days):</p> <p>mirabegron: 221<br/>solifenacin: 108<br/>fesoterodine: 100<br/>tolterodine ER: 100<br/>oxybutynin ER: 100<br/>oxybutynin IR: 75</p> <p>Proportion of patients persistent at 1 year:</p> <p>treatment-naïve: 19.0%<br/>treatment-experienced: 30.0%</p> <p>Median days on therapy:</p> <p>treatment-naïve: 90<br/>treatment-experienced: 205</p> | <p>Median MPR at 1 year:</p> <p>mirabegron: 0.645<br/>fesoterodine: 0.492<br/>oxybutynin ER: 0.328<br/>oxybutynin IR: 0.186<br/>solifenacin: 0.459<br/>tolterodine ER: 0.454</p> | <p><b>Age</b></p> <p>As age increased, median MPR increased for OAB medications:</p> <p>&lt;46 years: 0.273<br/>45–64 years: 0.372<br/><math>\geq 65</math> years: 0.492<br/>(<math>p &lt; 0.001</math> difference compared to <math>\geq 65</math> years)</p> <p><b>Treatment status</b></p> <p>Patients with prior experience of OAB medication use achieved a higher MPR than treatment-naïve patients (0.546 vs 0.328, <math>p &lt; 0.001</math>)</p> <p><b>Medication type</b></p> <p>Compared with antimuscarinics, patients taking mirabegron demonstrated greater persistence and statistically significantly greater adherence (64.5% vs 18.6%–49.2%, <math>p &lt; 0.001</math>) than those taking antimuscarinics</p> |

| Author (year)                   | Persistence*                                                                                                                                                                                                                                                                                                                                                                                                                                                                                                                                 | Adherence*                                                                                                                                               | Determinants of persistence and adherence                                                                                                                                                                                                                                                                                                                                                                                                                                                                                                                                                                                                                                                                                                                                                                                                                                                                                                                                                |
|---------------------------------|----------------------------------------------------------------------------------------------------------------------------------------------------------------------------------------------------------------------------------------------------------------------------------------------------------------------------------------------------------------------------------------------------------------------------------------------------------------------------------------------------------------------------------------------|----------------------------------------------------------------------------------------------------------------------------------------------------------|------------------------------------------------------------------------------------------------------------------------------------------------------------------------------------------------------------------------------------------------------------------------------------------------------------------------------------------------------------------------------------------------------------------------------------------------------------------------------------------------------------------------------------------------------------------------------------------------------------------------------------------------------------------------------------------------------------------------------------------------------------------------------------------------------------------------------------------------------------------------------------------------------------------------------------------------------------------------------------------|
| Wagg et al (2015) <sup>28</sup> | <p>Proportion of patients persistent at 6 months: &lt;40%</p> <p>Proportion of patients discontinued at 4 years:</p> <p>oxybutynin: 93%</p> <p>tolterodine IR: 90%</p> <p>tolterodine ER: 90%</p> <p>solifenacin: 90%</p> <p>darifenacin: 91%</p> <p>trospium: 94%</p> <p>flavoxate: 98%</p> <p>overall: 91.4%</p> <p>Median duration of first-line treatment (days):</p> <p>oxybutynin: 60</p> <p>tolterodine IR: 90</p> <p>tolterodine ER: 100</p> <p>solifenacin: 106</p> <p>darifenacin: 91</p> <p>trospium: 90</p> <p>flavoxate: 10</p> | Not reported                                                                                                                                             | <p><b>Medication type</b></p> <p>Initial treatment with solifenacin, darifenacin, tolterodine ER and tolterodine was associated with a significantly lower risk of discontinuation compared with oxybutynin as the first medication (HRs 0.68, 0.72, 0.77 and 0.84, respectively; p&lt;0.001 vs oxybutynin for each)</p> <p>Patients receiving flavoxate as initial treatment had a significantly higher risk of discontinuation compared with those who received oxybutynin (HR 2.48, p&lt;0.0001)</p> <p>There was no statistically significant difference in the risk of discontinuation with trospium as first-line compared with oxybutynin (p=0.1074)</p> <p><b>Age</b></p> <p>Compared with patients aged 40–64 years, patients aged &lt;20, 20–39, 65–74 and ≥75 years had a higher risk of discontinuation (HRs 1.08–1.19, all p≤0.0022)</p> <p><b>Gender</b></p> <p>Males had a slightly higher risk of discontinuation than females (HR 1.03, 95% CI 1.00–1.06, p=0.0341)</p> |
| Yeaw et al (2009) <sup>29</sup> | <p>Proportion of patients remaining on therapy (without a refill gap &gt;60 days) at:</p> <p>6 months: 28%</p> <p>1 year: 18%</p>                                                                                                                                                                                                                                                                                                                                                                                                            | Proportion of patients with mean MPR at 1 year: 35%                                                                                                      | Not reported                                                                                                                                                                                                                                                                                                                                                                                                                                                                                                                                                                                                                                                                                                                                                                                                                                                                                                                                                                             |
| Yu et al (2005) <sup>30</sup>   | <p>Proportion of patients without index prescription refill within the first 6 months: 36.9%</p> <p>Proportion of patients discontinued at:</p> <p>1 month: 42.7%</p> <p>2 months: 66.8%</p> <p>5 months days: 77.6%</p> <p>9 months: 86.3%</p> <p>At a 1-year follow-up, the rate of discontinuation was increased to 88.6%</p>                                                                                                                                                                                                             | <p>Mean MPR at:</p> <p>6 months: 0.34</p> <p>1 year: 0.22</p> <p>Proportion of patients with MPR ≥0.80 at:</p> <p>6 months: 4.9%</p> <p>1 year: 0.7%</p> | <p><b>Medication type</b></p> <p>Compared with oxybutynin, patients receiving tolterodine were less likely to have discontinued at 6 months (HR 0.74, 95% CI 0.67–0.81, p&lt;0.01)</p> <p><b>Polypharmacy</b></p> <p>The use of multiple drugs was associated with a higher risk of discontinuation by the 6-month follow up (HR 1.26, 95% CI 1.09–1.46, p&lt;0.01)</p> <p>Other significant predictors of higher persistence included: White ethnicity, previous hospitalization length, and starting treatment with tolterodine</p>                                                                                                                                                                                                                                                                                                                                                                                                                                                    |

1  
2  
3 CI = confidence interval; COPD = chronic obstructive pulmonary disease; ER = extended release; HR = hazard ratio; IR = immediate release; MPR = medication possession ratio;  
4 OAB = overactive bladder; OR = odds ratio; PIM = potentially inappropriate medication; PDC = proportion of days covered; RR = risk ratio; SD = standard deviation; UTIs = urinary tract  
5 infections

6 \*In cases where reported values differ from published values, they were derived from the published data; <sup>a</sup>cohort discontinuation percentages are also quoted for 3, 6, 12 and 18 months.  
7 However, these figures included some non-oral OAB medications. Therefore, these have not been included; <sup>b</sup>within 1.5x the duration of the initial prescription; <sup>c</sup>over a 4-year period;  
8 <sup>d</sup>stopped receiving an OAB medication for  $\geq 6$  months between end of therapy and end of the study's eligibility period; <sup>e</sup>stopped receiving an OAB medication for <6 months before  
9 restarting an OAB medication; <sup>f</sup>patients who filled only one prescription were given an MPR of zero; <sup>g</sup>no exact figures were quoted within the article text

10  
11  
12  
13  
14  
15  
16  
17  
18  
19  
20  
21  
22  
23  
24  
25  
26  
27  
28  
29  
30  
31  
32  
33  
34  
35  
36  
37  
38  
39  
40  
41  
42  
43  
44  
45  
46

For peer review only

## References

1. Brostrom S, Hallas J: Persistence of antimuscarinic drug use. *Eur J Clin Pharmacol* 2009; **65**: 309.
2. Chancellor MB, Migliaccio-Walle K, Bramley TJ et al: Long-term patterns of use and treatment failure with anticholinergic agents for overactive bladder. *Clin Ther* 2013; **35**: 1744.
3. Chapple CR, Nazir J, Hakimi Z et al: Persistence and adherence with mirabegron versus antimuscarinic agents in patients with overactive bladder: a retrospective observational study in UK clinical practice. *Eur Urol* 2017; **72**: 389.
4. Desgagne A, LeLorier J: Incontinence drug utilization patterns in Quebec, Canada. *Value Health* 1999; **2**: 452.
5. D'Souza AO, Smith MJ, Miller LA et al: Persistence, adherence, and switch rates among extended-release and immediate-release overactive bladder medications in a regional managed care plan. *J Manag Care Pharm* 2008; **14**: 291.
6. Gomes T, Juurlink DN, Mamdani MM: Comparative adherence to oxybutynin or tolterodine among older patients. *Eur J Clin Pharmacol* 2012; **68**: 97.
7. Gopal M, Haynes K, Bellamy SL et al: Discontinuation rates of anticholinergic medications used for the treatment of lower urinary tract symptoms. *Obstet Gynecol* 2008; **112**: 1311.
8. Ivanova JI, Hayes-Larson E, Sorg RA et al: Healthcare resource use and costs of privately insured patients who switch, discontinue, or persist on anti-muscarinic therapy for overactive bladder. *J Med Econ* 2014; **17**: 741.
9. Johnston S, Janning SW, Haas GP et al: Comparative persistence and adherence to overactive bladder medications in patients with and without diabetes. *Int J Clin Pract* 2012; **66**: 1042.
10. Kalder M, Pantazis K, Dinas K et al: Discontinuation of treatment using anticholinergic medications in patients with urinary incontinence. *Obstet Gynecol* 2014; **124**: 794.
11. Kleinman NL, Odell K, Chen CI et al: Persistence and adherence with urinary antispasmodic medications among employees and the impact of adherence on costs and absenteeism. *J Manag Care Spec Pharm* 2014; **20**: 1047.
12. Krhut J, Gartner M, Petzel M et al: Persistence with first line anticholinergic medication in treatment-naive overactive bladder patients. *Scand J Urol* 2014; **48**: 79.
13. Manack A, Motsko SP, Haag-Molkenteller C et al: Epidemiology and healthcare utilization of neurogenic bladder patients in a US claims database. *Neurourol Urodyn* 2011; **30**: 395.
14. Mauseth SA, Skurtveit S, Spigset O: Adherence, persistence and switch rates for anticholinergic drugs used for overactive bladder in women: data from the Norwegian Prescription Database. *Acta Obstet Gynecol Scand* 2013; **92**: 1208.
15. Nitti VM, Rovner ES, Franks B et al: Persistence with mirabegron versus tolterodine in patients with overactive bladder. *Am J Pharm Benefits* 2016; **8**: e25.
16. Pelletier EM, Vats V, Clemens JQ: Pharmacotherapy adherence and costs versus nonpharmacologic management in overactive bladder. *Am J Manag Care* 2009; **15**: S108.
17. Perfetto EM, Subedi P, Jumadilova Z: Treatment of overactive bladder: a model comparing extended-release formulations of tolterodine and oxybutynin. *Am J Manag Care* 2005; **11**: S150.
18. Sears CL, Lewis C, Noel K et al: Overactive bladder medication adherence when medication is free to patients. *J Urol* 2010; **183**: 1077.
19. Sicras-Mainar A, Navarro-Artieda R, Ruiz-Torrejon A et al: Persistence and concomitant medication in patients with overactive bladder treated with antimuscarinic agents in primary care. An observational baseline study. *Actas Urol Esp* 2016; **40**: 96.

- 1  
2  
3 20. Sicras-Mainar A, Navarro-Artieda R, Ruiz-Torrejon A et al: Impact of loss of work productivity in patients  
4 with overactive bladder treated with antimuscarinics in Spain: study in routine clinical practice  
5 conditions. *Clin Drug Investig* 2015; **35**: 795.  
6  
7 21. Sicras-Mainar A, Rejas-Gutierrez J, Navarro-Artieda R et al: Use of health care resources and  
8 associated costs in non-institutionalized vulnerable elders with overactive bladder treated with  
9 antimuscarinic agents in the usual medical practice. *Actas Urol Esp* 2014; **38**: 530.  
10  
11 22. Sicras-Mainar A, Rejas J, Navarro-Artieda R et al: Antimuscarinic persistence patterns in newly treated  
12 patients with overactive bladder: a retrospective comparative analysis. *Int Urogynecol J* 2014; **25**: 485.  
13  
14 23. Sicras-Mainar A, Rejas J, Navarro-Artieda R et al: Health economics perspective of fesoterodine,  
15 tolterodine or solifenacin as first-time therapy for overactive bladder syndrome in the primary care  
16 setting in Spain. *BMC Urol* 2013; **13**: 51.  
17  
18 24. Suehs BT, Davis C, Franks B et al: Effect of potentially inappropriate use of antimuscarinic medications  
19 on healthcare use and cost in individuals with overactive bladder. *J Am Geriatr Soc* 2016; **64**: 779.  
20  
21 25. Sussman D, Yehoshua A, Kowalski J et al: Adherence and persistence of mirabegron and  
22 anticholinergic therapies in patients with overactive bladder: a real-world claims data analysis. *Int J Clin  
23 Pract* 2017; **71**: e12824.  
24  
25 26. Wagg A, Compion G, Fahey A et al: Persistence with prescribed antimuscarinic therapy for overactive  
26 bladder: a UK experience. *BJU Int* 2012; **110**: 1767.  
27  
28 27. Wagg A, Franks B, Ramos B et al: Persistence and adherence with the new beta-3 receptor agonist,  
29 mirabegron, versus antimuscarinics in overactive bladder: early experience in Canada. *Can Urol Assoc  
30 J* 2015; **9**: 343.  
31  
32 28. Wagg A, Diles D, Berner T: Treatment patterns for patients on overactive bladder therapy: a  
33 retrospective statistical analysis using Canadian claims data. *JHEOR* 2015; **3**: 43.  
34  
35 29. Yeaw J, Benner JS, Walt JG et al: Comparing adherence and persistence across 6 chronic medication  
36 classes. *J Manag Care Pharm* 2009; **15**: 728.  
37  
38 30. Yu YF, Nichol MB, Yu AP et al: Persistence and adherence of medications for chronic overactive  
39 bladder/urinary incontinence in the California Medicaid program. *Value Health* 2005; **8**: 495.  
40  
41  
42  
43  
44  
45  
46  
47  
48  
49  
50  
51  
52  
53  
54  
55  
56  
57  
58  
59  
60

## Supplemental Information

### Literature Search Strategies

#### The following databases were searched;

- Allied and Complementary Database [AMED] (via OVID)
- Cumulative Index to Nursing and Allied Health Literature [CINAHL] (via EBSCOhost)
- MEDLINE (via EBSCOhost)
- Database of Reviews of Effects [DARE] (via CRD, University of York)
- Health Technology Assessment [HTA] (via CRD, University of York)
- Centre for Reviews and Dissemination [CRD] (via CRD, University of York)

The searches were conducted on the 24<sup>th</sup> April 2017

#### The date span of the searches;

- AMED – 1985 to April 2017
- CINAHL – 1937 to April 2017
- MEDLINE – 1946 to April 2017
- DARE / HTA / CRD – 1994 to April 2017

|   | <b>Searches (AMED)*</b>                                                                                                                                                                                            |    |
|---|--------------------------------------------------------------------------------------------------------------------------------------------------------------------------------------------------------------------|----|
| 1 | persisten* OR adheren* OR complian* OR discont* OR tolera* OR utili* OR database [In Article Title]                                                                                                                | –  |
| 2 | Bladder" OR "Overactive Bladder" OR "OAB" OR urin* OR incontinen* [In Article Title]                                                                                                                               | –  |
| 3 | Oxybutynin OR Tolterodine OR Fesoterodine OR Trospium OR Darifenacin OR Solifenacin OR Propiverine OR Imidafenacin OR Mirabegron OR Flavoxate OR Hyoscyamin* OR Anticholinerg* OR Antimuscarin* [In Article Title] | –  |
| 4 | (#1 AND #2 OR #3)                                                                                                                                                                                                  | 18 |
|   | <b>Searches (CINAHL &amp; MEDLINE)*</b>                                                                                                                                                                            |    |
| 5 | persisten* OR adheren* OR complian* OR discont* OR tolera* OR utili* OR database [In Article Title]                                                                                                                | –  |
| 6 | Bladder" OR "Overactive Bladder" OR "OAB" OR urin* OR incontinen* [In Article Title]                                                                                                                               | –  |
| 7 | Oxybutynin OR Tolterodine OR Fesoterodine OR Trospium OR Darifenacin OR Solifenacin OR Propiverine OR Imidafenacin OR Mirabegron OR Flavoxate OR Hyoscyamin* OR Anticholinerg* OR Antimuscarin* [In Article Title] | –  |



|    |                                                                                                                                                                                                                    |              |
|----|--------------------------------------------------------------------------------------------------------------------------------------------------------------------------------------------------------------------|--------------|
| 8  | (#5 AND #6 OR #7)                                                                                                                                                                                                  | 3,855        |
|    | <b>Searches (DARE / HTA / CRD)*</b>                                                                                                                                                                                |              |
| 9  | persisten* OR adheren* OR complian* OR discont* OR tolera* OR utili* OR database [In Article Title]                                                                                                                | –            |
| 10 | Bladder" OR "Overactive Bladder" OR "OAB" OR urin* OR incontinen* [In Article Title]                                                                                                                               | –            |
| 11 | Oxybutynin OR Tolterodine OR Fesoterodine OR Trospium OR Darifenacin OR Solifenacin OR Propiverine OR Imidafenacin OR Mirabegron OR Flavoxate OR Hyoscyamin* OR Anticholinerg* OR Antimuscarin* [In Article Title] | –            |
| 12 | (#9 AND #10 OR #11)                                                                                                                                                                                                | 24           |
| 13 | Total from #4, #8 and #12                                                                                                                                                                                          | 3,897        |
| 14 | Remove duplicates from 13 using EndNoteWeb                                                                                                                                                                         | <b>3,614</b> |

\* Boolean operators were used. No other limits or filters were applied to each database.

## MOOSE Checklist for Meta-analyses of Observational Studies

| Item No                                     | Recommendation                                                                                                                                                                                                                                                               | Reported on Page No                       |
|---------------------------------------------|------------------------------------------------------------------------------------------------------------------------------------------------------------------------------------------------------------------------------------------------------------------------------|-------------------------------------------|
| Reporting of background should include      |                                                                                                                                                                                                                                                                              |                                           |
| 1                                           | Problem definition                                                                                                                                                                                                                                                           | 3–5                                       |
| 2                                           | Hypothesis statement                                                                                                                                                                                                                                                         | N/A                                       |
| 3                                           | Description of study outcome(s)                                                                                                                                                                                                                                              | 7                                         |
| 4                                           | Type of exposure or intervention used                                                                                                                                                                                                                                        | 6–8                                       |
| 5                                           | Type of study designs used                                                                                                                                                                                                                                                   | 6                                         |
| 6                                           | Study population                                                                                                                                                                                                                                                             | 6–7                                       |
| Reporting of search strategy should include |                                                                                                                                                                                                                                                                              |                                           |
| 7                                           | Qualifications of searchers (eg, librarians and investigators)                                                                                                                                                                                                               | 7                                         |
| 8                                           | Search strategy, including time period included in the synthesis and key words                                                                                                                                                                                               | 6-7, Figure 1, Supplemental Information   |
| 9                                           | Effort to include all available studies, including contact with authors                                                                                                                                                                                                      | 7                                         |
| 10                                          | Databases and registries searched                                                                                                                                                                                                                                            | 5–6, Supplemental Information             |
| 11                                          | Search software used, name and version, including special features used (eg, explosion)                                                                                                                                                                                      | Supplemental Information                  |
| 12                                          | Use of hand searching (eg, reference lists of obtained articles)                                                                                                                                                                                                             | 6–7                                       |
| 13                                          | List of citations located and those excluded, including justification                                                                                                                                                                                                        | 6–7, Supplemental Tables 1 and 2          |
| 14                                          | Method of addressing articles published in languages other than English                                                                                                                                                                                                      | 6                                         |
| 15                                          | Method of handling abstracts and unpublished studies                                                                                                                                                                                                                         | 6–7                                       |
| 16                                          | Description of any contact with authors                                                                                                                                                                                                                                      | N/A                                       |
| Reporting of methods should include         |                                                                                                                                                                                                                                                                              |                                           |
| 17                                          | Description of relevance or appropriateness of studies assembled for assessing the hypothesis to be tested                                                                                                                                                                   | 6–7                                       |
| 18                                          | Rationale for the selection and coding of data (eg, sound clinical principles or convenience)                                                                                                                                                                                | 6–7                                       |
| 19                                          | Documentation of how data were classified and coded (eg, multiple raters, blinding and interrater reliability)                                                                                                                                                               | 6–7                                       |
| 20                                          | Assessment of confounding (eg, comparability of cases and controls in studies where appropriate)                                                                                                                                                                             | N/A                                       |
| 21                                          | Assessment of study quality, including blinding of quality assessors, stratification or regression on possible predictors of study results                                                                                                                                   | Not performed – see response to reviewers |
| 22                                          | Assessment of heterogeneity                                                                                                                                                                                                                                                  | 7                                         |
| 23                                          | Description of statistical methods (eg, complete description of fixed or random effects models, justification of whether the chosen models account for predictors of study results, dose-response models, or cumulative meta-analysis) in sufficient detail to be replicated | 7                                         |
| 24                                          | Provision of appropriate tables and graphics                                                                                                                                                                                                                                 | Figures 1 and 2 and Supplemental Tables   |

| Reporting of results should include |                                                                     |                                          |
|-------------------------------------|---------------------------------------------------------------------|------------------------------------------|
| 25                                  | Graphic summarizing individual study estimates and overall estimate | Figure 2 and Supplemental Tables 1 and 2 |
| 26                                  | Table giving descriptive information for each study included        | Supplemental Tables 1 and 2              |
| 27                                  | Results of sensitivity testing (eg, subgroup analysis)              | N/A                                      |
| 28                                  | Indication of statistical uncertainty of findings                   | N/A                                      |

| Item No                                 | Recommendation                                                                                                            | Reported on Page No                       |
|-----------------------------------------|---------------------------------------------------------------------------------------------------------------------------|-------------------------------------------|
| Reporting of discussion should include  |                                                                                                                           |                                           |
| 29                                      | Quantitative assessment of bias (eg, publication bias)                                                                    | N/A                                       |
| 30                                      | Justification for exclusion (eg, exclusion of non-English language citations)                                             | Figure 1 legend                           |
| 31                                      | Assessment of quality of included studies                                                                                 | Not performed – see response to reviewers |
| Reporting of conclusions should include |                                                                                                                           |                                           |
| 32                                      | Consideration of alternative explanations for observed results                                                            | 12–14                                     |
| 33                                      | Generalization of the conclusions (ie, appropriate for the data presented and within the domain of the literature review) | 13-15                                     |
| 34                                      | Guidelines for future research                                                                                            | 15                                        |
| 35                                      | Disclosure of funding source                                                                                              | 16                                        |

From: Stroup DF, Berlin JA, Morton SC, et al, for the Meta-analysis Of Observational Studies in Epidemiology (MOOSE) Group. Meta-analysis of Observational Studies in Epidemiology. A Proposal for Reporting. *JAMA*. 2000;283(15):2008-2012. doi: 10.1001/jama.283.15.2008.

# BMJ Open

## Real-world persistence and adherence to oral antimuscarinics and mirabegron in patients with overactive bladder (OAB) – a systematic literature review

|                                 |                                                                                                                                                                                                                                                                                                                                                 |
|---------------------------------|-------------------------------------------------------------------------------------------------------------------------------------------------------------------------------------------------------------------------------------------------------------------------------------------------------------------------------------------------|
| Journal:                        | <i>BMJ Open</i>                                                                                                                                                                                                                                                                                                                                 |
| Manuscript ID                   | bmjopen-2018-021889.R2                                                                                                                                                                                                                                                                                                                          |
| Article Type:                   | Research                                                                                                                                                                                                                                                                                                                                        |
| Date Submitted by the Author:   | 12-Sep-2018                                                                                                                                                                                                                                                                                                                                     |
| Complete List of Authors:       | Yeowell, Gillian; Manchester Metropolitan University, Health Professions Department (Physiotherapy)<br>Smith, Philip; Manchester Metropolitan University<br>Nazir, Jameel; Astellas Pharma Europe Ltd<br>Hakimi, Zalmi; Astellas Pharma BV<br>Siddiqui, Emad; Astellas Pharma Europe Ltd<br>Fatoye, Francis; Manchester Metropolitan University |
| <b>Primary Subject Heading</b>: | Urology                                                                                                                                                                                                                                                                                                                                         |
| Secondary Subject Heading:      | Urology                                                                                                                                                                                                                                                                                                                                         |
| Keywords:                       | Overactive bladder, persistence, adherence, antimuscarinics, $\beta$ 3 adrenergic receptor agonists, systematic literature review                                                                                                                                                                                                               |
|                                 |                                                                                                                                                                                                                                                                                                                                                 |

SCHOLARONE™  
Manuscripts

Only

1  
2  
3 **Real-world persistence and adherence to oral antimuscarinics and**  
4  
5 **mirabegron in patients with overactive bladder (OAB) – a**  
6  
7 **systematic literature review**  
8  
9

10  
11  
12  
13 **Gillian Yeowell<sup>1</sup>, Philip Smith<sup>1</sup>, Jameel Nazir<sup>2</sup>, Zalmai Hakimi<sup>3\*</sup>, Emad Siddiqui<sup>2</sup>, Francis**  
14 **Fatoye<sup>1</sup>**  
15  
16

17  
18  
19  
20  
21 <sup>1</sup>*Manchester Metropolitan University, Manchester, UK*  
22

23 <sup>2</sup>*Astellas Pharma Europe Ltd., Chertsey, UK*  
24

25 <sup>3</sup>*Astellas Pharma Europe B.V., Leiden, the Netherlands*  
26  
27

28 \*An employee of Astellas Pharma Inc. when the research was conducted  
29  
30

31 **Correspondence:**

32 Gillian Yeowell  
33 Health Professions Department (Physiotherapy)  
34 Birley Building  
35 Birley Fields Campus  
36 53 Bonsall Street  
37 Manchester M15 6GX  
38 Email: [G.Yeowell@mmu.ac.uk](mailto:G.Yeowell@mmu.ac.uk)  
39 Tel: 0161 247 2967  
40  
41  
42  
43  
44  
45  
46  
47

48 **Running head:** Adherence and persistence to OAB medication  
49  
50  
51

52 **Key Words:** Overactive bladder, persistence, adherence, antimuscarinics,  $\beta_3$ -adrenergic  
53 receptor agonists, systematic literature review  
54  
55  
56  
57

## ABSTRACT

**Purpose** To evaluate persistence and adherence of oral pharmacotherapy used in the treatment of overactive bladder (OAB) in a real-world setting.

**Materials and Methods** Systematic literature searches of six electronic publication databases were performed to identify observational studies of OAB patients treated with antimuscarinics and/or mirabegron. Studies obtaining persistence and adherence data from sources other than electronic prescription claims were excluded. Reference lists of identified studies and relevant systematic reviews were assessed to identify additional relevant studies.

**Results** The search identified 3897 studies, of which 30 were included. Overall, persistence ranged from 5–47%. In studies reporting data for antimuscarinics and mirabegron (n=3), 1-year persistence was 12–25% and 32–38%, respectively. Median time to discontinuation was <5 months for antimuscarinics (except one study [6.5 months]) and 5.6–7.4 months for mirabegron. The proportion of patients adherent at 1 year varied between 15–44%. In studies reporting adherence for antimuscarinics and mirabegron, adherence was higher with mirabegron (mean medication possession ratio (MPR): 0.59 vs 0.41–0.53; mean proportion of days covered: 0.66 vs 0.55; and median MPR: 0.65 vs 0.19–0.49). Reported determinants of persistence and adherence included female (sex), older age group, use of extended-release formulation and treatment experience.

**Conclusion** Most patients with OAB discontinued oral OAB pharmacotherapy and were non-adherent 1 year after treatment initiation. In general, mirabegron was associated with greater persistence and adherence compared to antimuscarinics. Combined with existing clinical trial evidence, this real-world review merits consideration of mirabegron for first-line pharmacological treatment among patients with OAB.

*The protocol for this systemic review is registered with PROSPERO: CRD42017059894*

## STRENGTHS AND LIMITATIONS

- This systematic literature review includes data for mirabegron, which was approved in 2013 and not covered in previous systematic reviews examining persistence and adherence to overactive bladder medication (OAB).
- Only observational database studies were included in this study, with the intention to provide a more accurate picture of rates of adherence and persistence to OAB medication, which are generally lower in routine clinical practice compared to randomized clinical trials.
- This systematic literature review provides a global picture of adherence and persistence to OAB medication based on the inclusion of data from Canada, Czech Republic, Denmark, Germany, Norway, Spain, the United Kingdom and the United States.
- Although determinants of persistence and adherence were evaluated in this study, the influence of other factors such as patient expectations, appropriate counselling and patient satisfaction with treatment could not be assessed.
- The definitions and calculations of persistence and adherence were not uniform across the literature. These terms were often used interchangeably, limiting the ability to compare across studies.

## INTRODUCTION

Overactive bladder (OAB) is defined as a condition with characteristic symptoms of urinary urgency, usually accompanied by frequency and nocturia, with or without urgency incontinence, in the absence of urinary tract infection (UTI) or other obvious pathology.<sup>1</sup> OAB affects 11.8–24.7% of adults in North America and Europe, and the prevalence increases with age.<sup>2</sup> In addition to age, risk factors for developing OAB include diabetes, UTIs and obesity.<sup>3 4</sup>

OAB symptoms are associated with a negative impact on health-related quality of life (HRQoL) and a significant economic burden. Indeed, bothersome OAB symptoms may lead to depression and anxiety, and sleep disturbances, which can adversely affect a patient's daily, social and professional functioning.<sup>5 6</sup> Whilst the cost of pharmaceutical treatment represents only a small fraction of the total therapy cost, the provision of containment products (eg, pads), treatment for clinical depression, nursing home stays and loss of productivity due to work absenteeism are the main cost drivers in OAB.<sup>7 8</sup> For example, the total annual cost of OAB was estimated to be \$24.9 billion in the United States in 2007<sup>9</sup> and €9.7 billion across five European countries (Germany, Italy, Spain, Sweden and the United Kingdom) and Canada in 2005.<sup>8</sup>

Behavioural and lifestyle modifications are routinely the initial treatment strategy for OAB, and pharmacotherapy is recommended only if conservative management is not effective.<sup>10</sup> As OAB is a chronic condition, it is important that patients continue with treatment to control symptoms.<sup>11</sup> Lack of persistence (time from treatment initiation to discontinuation),<sup>12</sup> and adherence (extent to which a patient acts in accordance with the prescribed interval and dose of a dosing regimen)<sup>12</sup> to medication are considered the leading causes of preventable morbidity in patients with chronic conditions;<sup>13 14</sup> they are also associated with greater indirect costs.<sup>14</sup> Studies have reported that patients compliant and adherent to OAB medication experienced significantly improved urinary symptoms and



1  
2  
3 HRQoL compared with patients who were non-persistent<sup>15 16</sup>. Although antimuscarinics are  
4 the current mainstay of oral pharmacotherapy, they are often associated with bothersome  
5 anticholinergic side effects, such as dry mouth and constipation; tolerability is one of the  
6 most common reasons for treatment discontinuation.<sup>11 17-20</sup> In a systematic review of  
7 antimuscarinic treatment in patients with OAB, rates of discontinuation at 12 weeks ranged  
8 from 4–31% in clinical trials and 43–83% in medical claims databases.<sup>19</sup>

9  
10  
11  
12  
13  
14  
15  
16 The other class of oral pharmacotherapy approved for the treatment of OAB is  
17  $\beta_3$ -adrenergic receptor agonists. Mirabegron is currently the only commercially available  
18 agent of this class licensed in countries across Europe, North America and Asia.<sup>21-23</sup> Due to  
19 mirabegron's mechanism of action, the incidence of side effects typically reported with  
20 antimuscarinic treatment are low with mirabegron and generally similar to placebo,<sup>24</sup> which  
21 may translate into better treatment persistence.<sup>25 26</sup> In addition, results of a recent economic  
22 analysis found that increased persistence with mirabegron treatment vs antimuscarinics was  
23 associated with reduced healthcare resource use and work hours lost, resulting in lower total  
24 costs.<sup>27</sup>

25  
26  
27  
28  
29  
30  
31  
32  
33  
34 In general, rates of persistence and adherence with antimuscarinics and mirabegron are  
35 typically lower in routine clinical practice compared to interventional clinical trials.<sup>11 28</sup> To help  
36 identify factors affecting long-term persistence and adherence to OAB pharmacotherapy, a  
37 contemporary, comprehensive review of real-world evidence is needed. As mirabegron was  
38 a relatively new OAB treatment, it was not included in previous systematic reviews.  
39  
40 Therefore, the current analysis aims to systematically review prospective and retrospective  
41 observational database studies conducted with antimuscarinics and/or mirabegron to  
42 determine the rates and determinants of persistence and adherence.

## 43 44 45 46 47 48 49 50 51 **METHODS**

52  
53  
54 This systematic literature review (SLR) was conducted in accordance with guidelines for the  
55 Meta-analysis of Observational Studies in Epidemiology (MOOSE)<sup>29</sup>. The protocol for the

1  
2  
3 review was registered *a priori* with the International Prospective Register of Systematic  
4 Reviews (registered January 18, 2017 with PROSPERO CRD42017059894).  
5  
6

7  
8 Searches were performed April 27, 2017 via the following electronic databases: Allied  
9 and Complementary Medicine Database (AMED); Cumulative Index to Nursing and Allied  
10 Health Literature (CINAHL); MEDLINE; Database of Abstracts of Reviews of Effects (DARE);  
11 Health Technology Assessment (HTA) database; and the Centre for Reviews and  
12 Dissemination (CRD) database. The search terms were persisten\* OR adheren\* OR  
13 complian\* OR discont\* OR tolera\* OR utili\* OR database [Title], AND "bladder" OR  
14 "overactive bladder" OR "OAB" OR urin\* OR incontinen\* [Title], OR oxybutynin OR  
15 tolterodine OR fesoterodine OR trospium OR darifenacin OR solifenacin OR propiverine OR  
16 imidafenacin OR mirabegron OR flavoxate OR hyoscyamin\* OR anticholinerg\* OR  
17 antimuscarin\* [Title].  
18  
19  
20  
21  
22  
23  
24  
25  
26

27  
28 All search results were exported into EndNote Web (Thomas Reuter, CA, USA)  
29 bibliography software and duplicates removed electronically and manually. The full electronic  
30 search strategy is outlined in the Supplemental information.  
31  
32  
33  
34

### 35 **Inclusion and exclusion criteria**

36  
37 Inclusion criteria were: prospective and retrospective observational database studies  
38 investigating persistence and adherence to oral medication for the treatment of OAB in  
39 adults, conducted in any geographical location and published on any date, within a peer-  
40 reviewed source. Exclusion criteria were: abstract unavailable; studies not yet fully  
41 completed; randomised controlled trials (RCTs); systematic reviews; narrative literature  
42 reviews; conference papers; single case studies/reports; studies investigating OAB  
43 medication among only healthy, asymptomatic participants; studies from which oral-only  
44 OAB persistence/adherence results cannot be isolated from other results (ie, transdermal  
45 patches); and studies containing patients aged <18 years (where the data pertaining to  
46 these patients could not be removed from the results) and studies not published in English.  
47  
48  
49  
50  
51  
52  
53  
54  
55  
56  
57

1  
2  
3 Populations with lower urinary tract symptoms due to stress incontinence and benign  
4 prostatic hyperplasia were also excluded.  
5  
6

### 7 **Study selection**

8  
9  
10 Duplicates were removed and title and abstract screenings were performed by two  
11 independent researchers (PS and GY). Full-text articles were obtained and studies were  
12 excluded if they did not meet the inclusion criteria.<sup>30</sup> Any disagreement in study selection  
13 was to be resolved through discussion and consultation with another member of the project  
14 team (FF) where necessary. During screening, open-label extension studies of RCTs were  
15 excluded as the trial designs were unlikely to reflect a real-world setting. Studies utilising  
16 data from hospital records, in addition to large-scale databases, were included provided that  
17 persistence and adherence data were determined from prescription claims data rather than  
18 extracted from supplemental patient interviews, patient-supplied pill counts or subjective  
19 questionnaires. The literature search was supplemented by screening for potential additional  
20 relevant studies identified from the reference lists of eligible articles.  
21  
22  
23  
24  
25  
26  
27  
28  
29  
30  
31

### 32 **Data extraction**

33  
34 Parameters that may affect persistence or adherence were collected, including patient  
35 characteristics (age and sex); interventions (initial [index] OAB drug and formulation) and  
36 comorbidities. The definitions, outcomes and determinants of treatment persistence and  
37 adherence were also collected, where reported. The extracted data were evaluated by one  
38 researcher and verified by a second researcher.  
39  
40  
41  
42  
43  
44  
45

### 46 **Data analysis**

47  
48 A descriptive analysis of extracted results is presented. No meta-analysis was planned due  
49 to the expected heterogeneity of reporting methodologies and data across studies.  
50  
51

### 52 **Patient and Public Involvement**

53  
54 Patients were not directly involved in the conduct of this study.  
55  
56  
57  
58  
59  
60

## RESULTS

### Brief overview of studies

Overall, 3897 articles were identified from the literature search; 3,614 were screened for title/abstract and 75 were assessed for eligibility (figure 1). Thirty articles were included in the SLR (supplementary table 1), including three identified from reference lists.<sup>31-33</sup> The articles described the findings of 28 independent studies. There was nil disagreement between the two independent researchers (PS, GY) during the screening process.

The data were collected from patients treated in Europe (12 studies) and North America (18 studies) (supplementary table 1) and were included in the analysis. The number of participants included in the published studies ranged from 377 to 103 250. Where stated, the mean age of the participants ranged from 44 to 80 years and the duration of follow-up ranged from 6 months to 7 years. Prescribed antimuscarinic interventions for patients with OAB included darifenacin, fesoterodine, flavoxate, hyoscyamine, imipramine, oxybutynin, propiverine, solifenacin, tolterodine and trospium chloride. Mirabegron was prescribed in four studies.<sup>18 31 32 34</sup> Uncommon oral interventions included imipramine, a tricyclic antidepressant with an unknown mechanism of action in the context of OAB,<sup>35</sup> and bethanechol, a muscarinic receptor agonist.<sup>33</sup> The methods used to quantify adherence and persistence differed across the studies (supplementary table 1). In general, medication possession rate (MPR) or proportion of days covered (PDC) by prescription were typically used as a measure of adherence to a drug. Persistence was typically defined as the proportion of patients continuing therapy/refilling prescriptions for the follow-up period (without discontinuing the index drug or switching to other OAB drug[s]) and/or the median time to discontinuation (TTD).

### Persistence

Overall, persistence rates decreased over time, regardless of agent (supplementary table 2).

### **Antimuscarinic studies**

Data for persistence (or discontinuation) at approximately 6 months was available in 14 articles<sup>32 33 36-47</sup> which reported data on antimuscarinics only. Yeaw 2009 was an exception due to the inclusion of bethanechol (a muscarinic receptor agonist), which accounted for <1.5% of the pharmacy claims for OAB medications.<sup>33</sup> The proportion of patients persistent at 6 months was <50% except for the studies of Sicras-Mainar *et al*,<sup>42-44</sup> where persistence ranged from 57–71%. In addition, two studies reported discontinuation rates of 6–43% after 1 month of initial treatment.<sup>41 47</sup>

At 1 year, persistence rates for antimuscarinics across 19 studies ranged from around 5% up to 47%.<sup>18 26 34-36 38 40 42 43 45 46 48-53</sup> Median TTD was <5 months (30 to 128 days) for all medications across all studies,<sup>18 26 32 34 38 48 54</sup> with the exception of Krhut *et al*<sup>40</sup> (6.5 months). At 2 years, over 75% of patients discontinued treatment.<sup>36 38 50 54 55</sup> Rates of treatment switching were infrequently reported, and where provided, were ≤17% of patients.<sup>32 37 39 48 52 54 55</sup>

### **Antimuscarinic and mirabegron studies**

In all four studies, a greater proportion of patients persisted with mirabegron compared with antimuscarinics. In one study, persistence rates for tolterodine and mirabegron at 6 months were 19% and 35%, respectively.<sup>31</sup> Persistence at 1 year ranged from 8–25% for antimuscarinics and from 32–38% for mirabegron, as reported in three studies.<sup>18 26 34</sup> Where tested inferentially, 1-year persistence was statistically significantly greater with mirabegron compared to antimuscarinics ( $p < 0.0001$ ), with the exception of oxybutynin ( $p = 0.002$ ).<sup>18</sup> The risk of discontinuing within 1 year was also greater with antimuscarinics compared to mirabegron ( $p < 0.001$ ).<sup>18 32</sup> Overall, mirabegron, solifenacin and fesoterodine were associated with the highest rates of persistence.<sup>18 26</sup>

Across the four studies, 40–81% and 83–96% of the mirabegron and antimuscarinic patient cohorts were treatment naïve, having received no OAB drug for at least 6 months prior to

1  
2  
3 their first index of OAB treatment.<sup>18 31 32 34</sup> Studies typically found that treatment-naïve  
4 patients prescribed mirabegron or antimuscarinics had lower persistence than treatment-  
5 experienced patients prescribed the same OAB treatments. In the three studies that  
6 assessed persistence in treatment-experienced and treatment-naïve populations,  
7 persistence was higher with mirabegron treatment (significantly in two studies) compared  
8 with antimuscarinics.<sup>18 31 32</sup>

9  
10  
11 Median TTD in the overall study populations was longer with mirabegron (5.6–7.4  
12 months) compared with the assessed antimuscarinics (1.0–3.6 months).<sup>18 26 31 34</sup>

### 13 14 15 **Adherence**

16  
17 Adherence rates to all OAB medications reduced over time in all studies and varied across  
18 studies (supplementary table 2).

### 19 20 21 **Antimuscarinic studies**

22  
23 At 1 year, the proportion of adherent patients varied between 1%<sup>47</sup> and 36%,<sup>48</sup> across those  
24 studies that provided these data. Few studies reported adherence beyond 1 year. However,  
25 Sears *et al* reported that 34% of patients were adherent at the end of 3 years,<sup>56</sup> which was  
26 comparable to the adherence rates reported by some other studies at just 1 year.<sup>48 52</sup>

### 27 28 29 **Antimuscarinic and mirabegron studies**

30  
31 In the three studies, adherence at 1 year was significantly higher in patients receiving  
32 mirabegron compared with antimuscarinics (mean MPR: 0.59 vs 0.41 to 0.53; mean PDC:  
33 0.66 vs 0.55; and median MPR: 0.65 vs 0.19 to 0.49).<sup>18 26 34</sup> The proportion of patients  
34 adherent at 1 year was also greater with mirabegron compared with antimuscarinics (mean  
35 MPR  $\geq 0.80$ : 43% vs 22–35%; mean PDC  $\geq 0.80$ : 44% vs 31%).<sup>18 26</sup> Within treatment-naïve  
36 patients specifically, adherence was greater with mirabegron compared to antimuscarinics  
37 0.59 vs. 0.39–0.51, p values 0.02 to <0.0001).<sup>18</sup>

### Determinants of persistence and adherence

Determinants of persistence and adherence were reported in 24 of the 30 studies. As expected, most studies reported medication type as a determinant of persistence/adherence (figure 2; supplementary table 2). In general, persistence and adherence were higher in: older patients compared with younger patients,<sup>26 31 32 35-39 46 48-50 52 54 57</sup> female patients compared with their male counterparts,<sup>32 35 36 39 49 50 57</sup> except in one study,<sup>56</sup> patients receiving extended-release (ER) formulations compared with immediate-release formulations,<sup>48 54</sup> and treated patients compared to treatment naïve patients (or untreated in the pre-index period [6 months or 1 year]).<sup>18 26 36</sup> Comorbidities, including diabetes, Parkinson's disease, epilepsy, dementia, multiple sclerosis and hypertension, were correlated with increased treatment persistence and adherence,<sup>49 50 57</sup> exceptions were chronic obstructive pulmonary disease and migraine.<sup>50 57</sup>

Other reported determinants of favorable persistence and adherence included higher treatment doses,<sup>36</sup> low daily quantity of tablets,<sup>37</sup> absence of UTI; higher baseline OAB costs;<sup>39</sup> treatment by urologists vs gynecologists/general practitioners; the absence of side effects (headache, stomach upset and glaucoma);<sup>50</sup> White vs Black, Hispanic and Asian patients and patients of other ethnicities,<sup>35 47</sup> lower medication co-payment,<sup>35</sup> and use of fewer medications.<sup>47</sup>

### DISCUSSION

This systematic review provides an overview of persistence and adherence with oral pharmacotherapies used to treat patients with OAB in real-life clinical practice. A wealth of data were collected from 30 articles, which described 28 observational studies performed in Europe and North America totaling over 500 000 patients. A number of key findings were identified, including greater persistence and adherence with mirabegron vs antimuscarinics,<sup>18 26 31 34</sup> in females vs males,<sup>32 35 39 49 57</sup> in older vs younger patients,<sup>26 31 32 35-39 46 48-50 52 54 57</sup> and in previously treated vs untreated patients.<sup>18 26 36</sup>

1  
2  
3 Across the studies, persistence appeared to reduce very quickly after initiation of  
4 treatment for all OAB therapies, with low rates (<50%) already evident at 1 month.<sup>31 41 47</sup>  
5  
6 Longer follow-up periods showed that large proportions of patients discontinued treatment by  
7  
8 1 year (62–100%)<sup>18 26 33 38 45–47 49 50 54</sup> and by the end of 3 years, less than 10% of patients  
9  
10 continued on any antimuscarinic.<sup>54</sup> These steep reductions in rates of persistence over time  
11  
12 were mirrored by the reported adherence rates.  
13  
14

15  
16 The chronic nature of OAB means that consistent and long-term use of medication is  
17  
18 essential to manage OAB symptoms and improve health outcomes. It is therefore important  
19  
20 for patients to receive a first-line treatment that has a good efficacy-tolerability profile and  
21  
22 evidence of favorable persistence and adherence vs other treatment options. Among the  
23  
24 antimuscarinics, solifenacin and fesoterodine were generally associated with better  
25  
26 persistence and adherence.<sup>18 26 43 52</sup> In studies that assessed both mirabegron and  
27  
28 antimuscarinics, persistence in the mirabegron cohorts, including the treatment-naïve  
29  
30 populations, was statistically significantly greater ( $p < 0.001$ ).<sup>18 26 31</sup> Due to the recommended  
31  
32 treatment sequence for OAB<sup>10 58</sup>, the majority of patients that receive mirabegron are  
33  
34 treatment-experienced; however, these studies suggest a benefit of mirabegron treatment  
35  
36 regardless of treatment status. Adherence to mirabegron was also greater; however,  
37  
38 mean/median MPR values in the overall mirabegron populations did not indicate medication  
39  
40 adherence (MPR/PDC < 0.80). Although these studies did not directly assess the reason(s)  
41  
42 for an observed difference in persistence and adherence with mirabegron vs  
43  
44 antimuscarinics, proposed reasons include lower rates of bothersome anticholinergic  
45  
46 adverse events, particularly dry-mouth, and unmet expectations of antimuscarinic  
47  
48 treatment.<sup>18 26 31</sup>  
49

50  
51 It is well established that poor medication persistence and adherence reduces the ability  
52  
53 to achieve optimum clinical benefits and limits treatment success, especially for chronic  
54  
55 conditions such as OAB.<sup>13 14 17 46</sup> The unwillingness of patients to continue to take long-term  
56  
57 treatment has been observed across many chronic conditions, with non-adherence to  
58  
59



1  
2  
3 medication observed in ~50% of patients.<sup>13</sup> An analysis across six chronic conditions found  
4  
5 1-year persistence and adherence rates to be low for all conditions, and lowest for OAB  
6  
7 medications (antimuscarinics),<sup>33</sup> suggesting an unmet treatment need. However, this study  
8  
9 was performed prior to the availability of mirabegron for use in routine clinical practice, and  
10  
11 therefore an updated analysis of persistence in chronic conditions might be warranted.  
12

13  
14 As alluded to above, persistence and adherence to treatment is expected to improve  
15  
16 outcomes for patients with OAB. In two studies, better OAB treatment persistence and  
17  
18 adherence were associated with improved clinical outcomes and HRQoL compared with  
19  
20 patients who were non-persistent.<sup>15 16</sup> These data are consistent with studies describing  
21  
22 other chronic diseases, such as diabetes and depression, where good adherence resulted in  
23  
24 improved health outcomes<sup>14 59</sup> as well as reduced complications and disability, and improved  
25  
26 HRQoL and life expectancy.<sup>60</sup> Moreover, greater persistence and adherence to treatment for  
27  
28 OAB is associated with significantly lower medical, sick leave and short-term disability  
29  
30 costs.<sup>35</sup> Indeed, economic models based on real-world inputs suggest that improved  
31  
32 persistence with mirabegron translates into benefits of reduced healthcare resource use, and  
33  
34 lower direct and indirect costs of treatment compared with antimuscarinics.<sup>27 61</sup> Additionally,  
35  
36 mirabegron is reported to be cost effective vs six antimuscarinics from commercial and  
37  
38 Medicare perspectives in the United States, due to fewer projected adverse events and  
39  
40 comorbidities, and data suggesting better persistence.<sup>62</sup>  
41

42  
43 Independent variables for treatment discontinuation were studied by at least half of the  
44  
45 papers included in our literature review, of which sex, age, comorbidities and previous  
46  
47 experience of OAB medications were shown to be important factors in more than two  
48  
49 studies. Only six studies reported switch-rates and although these were low, the treatment  
50  
51 strategy of cycling antimuscarinic agents in patients who do not achieve symptom relief is  
52  
53 common in clinical practice. Yet recent analysis of real-world data suggests that switching  
54  
55 antimuscarinics may provide sub-optimal care.<sup>55</sup> In contrast, switching to mirabegron from  
56  
57  
58  
59  
60

1  
2  
3 antimuscarinic therapy has proved beneficial in over 50% of patients with OAB in an  
4 observational study.<sup>63</sup>  
5  
6

7  
8 This review represents a large pooled analysis of real-world data for persistence and  
9 adherence to oral OAB medication across different geographical locations (Canada, Czech  
10 Republic, Denmark, Germany, Norway, Spain, the United Kingdom and the United States);  
11 however, there were no identifiable trends between data and countries. The definitions and  
12 calculations of persistence and adherence were not uniform across the literature and the  
13 terms were often used interchangeably. This lack of consistency led to some limitations on  
14 the ability to compare across studies. Other limitations to performing cross-study  
15 comparisons or pooled analyses in this SLR include differences in the individual study  
16 populations and/or study designs, resulting in considerable variations between data. For  
17 example, the median TTD for oxybutynin ER and tolterodine ER were determined to be 5.1  
18 and 5.5 months, respectively, by one study,<sup>54</sup> but only 60 and 56 days, respectively, by  
19 another study.<sup>18</sup>  
20  
21  
22  
23  
24  
25  
26  
27  
28  
29  
30  
31

32 Furthermore, it is very difficult to capture the specific reasons for treatment  
33 discontinuation from prescription-driven or medical claim data rather than patient-derived  
34 data.<sup>18</sup> The current review excluded data from RCTs to better reflect patient behavior in the  
35 general OAB population in real-life clinical practice.<sup>11</sup> Only one paper included in our review  
36 reported that antimuscarinic side effects were significantly associated with discontinuation,<sup>50</sup>  
37 despite reports that such side effects are bothersome and a common reason for  
38 discontinuation of antimuscarinic treatment.<sup>11 19 28</sup> Additional factors that could not be  
39 assessed by our study, but can influence persistence with treatment in OAB patients are  
40 patient expectations, appropriate counselling and patient satisfaction with treatment.<sup>11 17 28</sup>  
41  
42  
43  
44  
45  
46  
47  
48  
49  
50

51 In addition to the limitations listed above, it should be noted that Sicras-Mainar *et al*<sup>42 43</sup>  
52 reported data on the same patients (in terms of demographics and the  
53 timeframe/geographical source). This is also the case for two studies published by Sicras-  
54  
55  
56  
57  
58  
59  
60

1  
2  
3 Mainar *et al* in 2013 and 2014.<sup>53 64</sup> Also, this SLR excluded data on non-oral  
4  
5 pharmacotherapies (eg, onabotulinum toxin A) and combination mirabegron plus  
6  
7 antimuscarinic therapies, where additional efficacy has been reported compared to the  
8  
9 monotherapies.<sup>65</sup> Further research on persistence and adherence to these OAB therapies is  
10  
11 needed to better evaluate current treatment options. Additional studies are also required to  
12  
13 improve our understanding of persistence and adherence in OAB, including qualitative  
14  
15 studies to examine the reasons for discontinuation and real-world studies to examine  
16  
17 resource use associated with OAB medication in relation to adherence and persistence. As  
18  
19 OAB is a chronic disease, clinicians should not only take into consideration the efficacy and  
20  
21 side effects of an agent when deciding on treatment options, but also ensure that realistic  
22  
23 patient expectations from treatment are set through patient education and counselling. The  
24  
25 patient's life-style should also be considered as this is likely to impact adherence and  
26  
27 persistence with OAB therapy.

## 28 29 **CONCLUSIONS**

30  
31  
32 Persistence and adherence were greater with mirabegron compared with antimuscarinics,  
33  
34 and appeared to be greater with solifenacin and fesoterodine compared with other  
35  
36 antimuscarinics. In addition, greater persistence and adherence were generally observed in  
37  
38 patients who were female, older, treatment-experienced and receiving ER formulations.  
39  
40 Together with the efficacy and tolerability data from clinical trials, real-world data examined  
41  
42 in this review warrants consideration of using mirabegron as first-line oral pharmacotherapy  
43  
44 for patients with OAB.  
45  
46  
47  
48  
49  
50  
51  
52  
53  
54  
55  
56  
57  
58  
59  
60

## Contributorship Statement

GY, PS, JN, ZH, ES and FF were involved in conceptualisation and design of the study and critical review of the manuscript. FF, PS and GY performed the data extraction. All authors approved the final manuscript as submitted.

## Competing Interests

JN and ES are employed by Astellas Pharma Inc. ZH was employed by Astellas Pharma Inc. as the time of the study. FF has received a grant from Astellas for study design, data extraction and manuscript development. GY and PS declared no conflicts.

## Funding

The study was supported by Astellas Pharma Global Development.

## Data Sharing Statement

The search strategy and all data supporting this study are provided as supplementary information accompanying this paper.

## Acknowledgments

Patients were not directly involved in the conduct of this study. Medical writing support was provided by Claire Chinn, PhD, and Kinnari Patel, PhD, of Bioscript Medical and funded by Astellas Pharma Global Development.

## Abbreviations and Acronyms

ER = extended-release

HRQoL = health-related quality of life

MPR = medication possession rate

1  
2  
3 OAB = overactive bladder  
4

5  
6 PDC = proportion of days covered  
7

8  
9 PRISMA = Preferred Reporting Items for Systematic Reviews and Meta-Analyses  
10

11  
12 RCTs = randomised controlled trials  
13

14  
15 SLR = systematic literature review  
16

17  
18 TTD = time to discontinuation  
19

20  
21 UTI = urinary tract infection  
22  
23  
24  
25  
26  
27  
28  
29  
30  
31  
32  
33  
34  
35  
36  
37  
38  
39  
40  
41  
42  
43  
44  
45  
46  
47  
48  
49  
50  
51  
52  
53  
54  
55  
56  
57  
58  
59  
60

## REFERENCES

1. Abrams P, Cardozo L, Fall M, *et al*. The standardisation of terminology of lower urinary tract function: report from the Standardisation Sub-committee of the International Continence Society. *Neurourol Urodyn* 2002;21(2):167-78.
2. Eapen RS, Radomski SB. Review of the epidemiology of overactive bladder. *Res Rep Urol* 2016;8:71-6. doi: 10.2147/RRU.S102441
3. Brown JS, McGhan WF, Chokroverty S. Comorbidities associated with overactive bladder. *Am J Manag Care* 2000;6(11 Suppl):S574-9.
4. Subak LL, Richter HE, Hunskaar S. Obesity and urinary incontinence: epidemiology and clinical research update. *J Urol* 2009;182(6 Suppl):S2-7. doi: 10.1016/j.juro.2009.08.071
5. Coyne KS, Payne C, Bhattacharyya SK, *et al*. The impact of urinary urgency and frequency on health-related quality of life in overactive bladder: results from a national community survey. *Value Health* 2004;7(4):455-63. doi: 10.1111/j.1524-4733.2004.74008.x
6. Coyne KS, Sexton CC, Kopp ZS, *et al*. The impact of overactive bladder on mental health, work productivity and health-related quality of life in the UK and Sweden: results from EpiLUTS. *BJU Int* 2011;108(9):1459-71. doi: 10.1111/j.1464-410X.2010.10013.x
7. Herschorn S. Global perspective of treatment failures. *Can Urol Assoc J* 2013;7(9-10 Suppl 4):S170-1. doi: 10.5489/cuaj.1613
8. Irwin DE, Mungapen L, Milsom I, *et al*. The economic impact of overactive bladder syndrome in six Western countries. *BJU Int* 2009;103(2):202-9. doi: 10.1111/j.1464-410X.2008.08036.x

- 1  
2  
3 9. Onukwugha E, Zuckerman IH, McNally D, *et al.* The total economic burden of overactive  
4 bladder in the United States: a disease-specific approach. *Am J Manag Care*  
5 2009;15(4 Suppl):S90-7.  
6  
7  
8  
9  
10 10. Lucas M, Bedretidnova D, Berghmans L, *et al.* European Association of Urology.  
11 Guidelines on urinary incontinence. 2015. [http://uroweb.org/wp-content/uploads/20-](http://uroweb.org/wp-content/uploads/20-Urinary-Incontinence_LR1.pdf)  
12 [Urinary-Incontinence\\_LR1.pdf](http://uroweb.org/wp-content/uploads/20-Urinary-Incontinence_LR1.pdf) (accessed October 2016).  
13  
14  
15  
16 11. Kim TH, Lee KS. Persistence and compliance with medication management in the  
17 treatment of overactive bladder. *Investig Clin Urol* 2016;57(2):84-93. doi:  
18 10.4111/icu.2016.57.2.84  
19  
20  
21  
22  
23 12. Cramer JA, Roy A, Burrell A, *et al.* Medication compliance and persistence: terminology  
24 and definitions. *Value Health* 2008;11(1):44-7. doi: 10.1111/j.1524-  
25 4733.2007.00213.x  
26  
27  
28  
29  
30 13. Brown MT, Bussell J, Dutta S, *et al.* Medication adherence: truth and consequences. *Am*  
31 *J Med Sci* 2016;351(4):387-99. doi: 10.1016/j.amjms.2016.01.010  
32  
33  
34  
35 14. World Health Organization. Adherence to long-term therapies: evidence for action. 2003.  
36 [http://www.who.int/chp/knowledge/publications/adherence\\_report/en/](http://www.who.int/chp/knowledge/publications/adherence_report/en/) (accessed  
37 November 2016).  
38  
39  
40  
41  
42 15. Andy UU, Arya LA, Smith AL, *et al.* Is self-reported adherence associated with clinical  
43 outcomes in women treated with anticholinergic medication for overactive bladder?  
44 *Neurourol Urodyn* 2016;35(6):738-42. doi: 10.1002/nau.22798  
45  
46  
47  
48  
49 16. Kim TH, Choo MS, Kim YJ, *et al.* Drug persistence and compliance affect patient-  
50 reported outcomes in overactive bladder syndrome. *Qual Life Res* 2016;25(8):2021-  
51 9. doi: 10.1007/s11136-015-1216-z  
52  
53  
54  
55  
56  
57  
58  
59  
60

- 1  
2  
3 17. Benner JS, Nichol MB, Rovner ES, *et al.* Patient-reported reasons for discontinuing  
4 overactive bladder medication. *BJU Int* 2010;105(9):1276-82. doi: 10.1111/j.1464-  
5 410X.2009.09036.x  
6  
7  
8  
9  
10 18. Chapple CR, Nazir J, Hakimi Z, *et al.* Persistence and adherence with mirabegron  
11 versus antimuscarinic agents in patients with overactive bladder: a retrospective  
12 observational study in UK clinical practice. *Eur Urol* 2017;72(3):389-99. doi:  
13 10.1016/j.eururo.2017.01.037  
14  
15  
16  
17  
18 19. Sexton CC, Notte SM, Maroulis C, *et al.* Persistence and adherence in the treatment of  
19 overactive bladder syndrome with anticholinergic therapy: a systematic review of the  
20 literature. *Int J Clin Pract* 2011;65(5):567-85. doi: 10.1111/j.1742-1241.2010.02626.x  
21  
22  
23  
24  
25 20. Veenboer PW, Bosch JL. Long-term adherence to antimuscarinic therapy in everyday  
26 practice: a systematic review. *J Urol* 2014;191(4):1003-8. doi:  
27 10.1016/j.juro.2013.10.046  
28  
29  
30  
31  
32 21. European Medicines Agency. Mirabegron summary of product characteristics. 2016.  
33 [http://www.ema.europa.eu/docs/en\\_GB/document\\_library/EPAR -](http://www.ema.europa.eu/docs/en_GB/document_library/EPAR_-_Product_Information/human/002388/WC500137309.pdf)  
34 [\\_Product Information/human/002388/WC500137309.pdf](http://www.ema.europa.eu/docs/en_GB/document_library/EPAR_-_Product_Information/human/002388/WC500137309.pdf) (accessed December  
35 2016).  
36  
37  
38  
39  
40  
41 22. Food and Drug Administration. Drug approval package. Myrbetriq (mirabegron) extended  
42 release tablets. 2012.  
43 [https://www.accessdata.fda.gov/drugsatfda\\_docs/nda/2012/202611Orig1s000TOC.cfm](https://www.accessdata.fda.gov/drugsatfda_docs/nda/2012/202611Orig1s000TOC.cfm).  
44  
45  
46  
47  
48  
49  
50 23. Pharmaceuticals and Medical Devices Agency. Betanis. Review of deliberation results.  
51 2011; (August 2017). <http://www.pmda.go.jp/files/000204240.pdf>.  
52  
53  
54  
55  
56  
57  
58  
59  
60



- 1  
2  
3 24. Maman K, Aballea S, Nazir J, *et al.* Comparative efficacy and safety of medical  
4 treatments for the management of overactive bladder: a systematic literature review  
5 and mixed treatment comparison. *Eur Urol* 2014;65(4):755-65. doi:  
6  
7 10.1016/j.eururo.2013.11.010  
8  
9  
10  
11 25. Kobayashi M, Nukui A, Kamai T. Comparative efficacy and tolerability of antimuscarinic  
12 agents and the selective beta3-adrenoceptor agonist, mirabegron, for the treatment  
13 of overactive bladder: which is more preferable as an initial treatment? *Low Urin*  
14 *Tract Symptoms* 2016:Epub ahead of print. doi: 10.1111/luts.12153  
15  
16  
17  
18  
19  
20 26. Wagg A, Franks B, Ramos B, *et al.* Persistence and adherence with the new beta-3  
21 receptor agonist, mirabegron, versus antimuscarinics in overactive bladder: early  
22 experience in Canada. *Can Urol Assoc J* 2015;9(9-10):343-50. doi:  
23  
24 10.5489/cuaj.3098  
25  
26  
27  
28  
29 27. Nazir J, Berling M, McCrea C, *et al.* Economic impact of mirabegron versus  
30 antimuscarinics for the treatment of overactive bladder in the UK.  
31  
32 *Pharmacoeconomics Open* 2017;1:25-36.  
33  
34  
35  
36 28. Basra RK, Wagg A, Chapple C, *et al.* A review of adherence to drug therapy in patients  
37 with overactive bladder. *BJU Int* 2008;102(7):774-9. doi: 10.1111/j.1464-  
38 410X.2008.07769.x  
39  
40  
41  
42  
43 29. Stroup DF, Berlin JA, Morton SC, *et al.* Meta-analysis of observational studies in  
44 epidemiology: a proposal for reporting. Meta-analysis Of Observational Studies in  
45 Epidemiology (MOOSE) group. *JAMA* 2000;283(15):2008-12.  
46  
47  
48  
49  
50 30. Moher D, Liberati A, Tetzlaff J, *et al.* Preferred reporting items for systematic reviews and  
51 meta-analyses: the PRISMA statement. *Int J Surg* 2010;8(5):336-41. doi:  
52  
53 10.1016/j.ijsu.2010.02.007  
54  
55  
56  
57  
58  
59  
60

- 1  
2  
3 31. Nitti VM, Rovner ES, Franks B, *et al.* Persistence with mirabegron versus tolterodine in  
4 patients with overactive bladder. *Am J Pharm Benefits* 2016;8(2):e25-e33.  
5  
6  
7  
8 32. Wagg A, Diles D, Berner T. Treatment patterns for patients on overactive bladder  
9 therapy: a retrospective statistical analysis using Canadian claims data. *JHEOR*  
10 2015;3(1):43-55.  
11  
12  
13  
14 33. Yeaw J, Benner JS, Walt JG, *et al.* Comparing adherence and persistence across 6  
15 chronic medication classes. *J Manag Care Pharm* 2009;15(9):728-40. doi:  
16 10.18553/jmcp.2009.15.9.728  
17  
18  
19  
20  
21 34. Sussman D, Yehoshua A, Kowalski J, *et al.* Adherence and persistence of mirabegron  
22 and anticholinergic therapies in patients with overactive bladder: a real-world claims  
23 data analysis. *Int J Clin Pract* 2017;71(3-4):e12824. doi: 10.1111/ijcp.12824  
24  
25  
26  
27  
28 35. Kleinman NL, Odell K, Chen CI, *et al.* Persistence and adherence with urinary  
29 antispasmodic medications among employees and the impact of adherence on costs  
30 and absenteeism. *J Manag Care Spec Pharm* 2014;20(10):1047-56. doi:  
31 10.18553/jmcp.2014.20.10.1047  
32  
33  
34  
35  
36  
37 36. Brostrom S, Hallas J. Persistence of antimuscarinic drug use. *Eur J Clin Pharmacol*  
38 2009;65(3):309-14. doi: 10.1007/s00228-008-0600-9  
39  
40  
41  
42 37. Desgagne A, LeLorier J. Incontinence drug utilization patterns in Quebec, Canada. *Value*  
43 *Health* 1999;2(6):452-8. doi: 10.1046/j.1524-4733.1999.26005.x  
44  
45  
46  
47 38. Gomes T, Juurlink DN, Mamdani MM. Comparative adherence to oxybutynin or  
48 tolterodine among older patients. *Eur J Clin Pharmacol* 2012;68(1):97-9. doi:  
49 10.1007/s00228-011-1090-8  
50  
51  
52  
53  
54 39. Ivanova JI, Hayes-Larson E, Sorg RA, *et al.* Healthcare resource use and costs of  
55 privately insured patients who switch, discontinue, or persist on anti-muscarinic  
56  
57  
58  
59  
60

- 1  
2  
3 therapy for overactive bladder. *J Med Econ* 2014;17(10):741-50. doi:  
4  
5 10.3111/13696998.2014.941066  
6  
7  
8 40. Krhut J, Gartner M, Petzel M, *et al.* Persistence with first line anticholinergic medication  
9  
10 in treatment-naive overactive bladder patients. *Scand J Urol* 2014;48(1):79-83. doi:  
11  
12 10.3109/21681805.2013.814707  
13  
14  
15 41. Perfetto EM, Subedi P, Jumadilova Z. Treatment of overactive bladder: a model  
16  
17 comparing extended-release formulations of tolterodine and oxybutynin. *Am J Manag*  
18  
19 *Care* 2005;11(4 Suppl):S150-7.  
20  
21  
22 42. Sicras-Mainar A, Navarro-Artieda R, Ruiz-Torrejon A, *et al.* Impact of loss of work  
23  
24 productivity in patients with overactive bladder treated with antimuscarinics in Spain:  
25  
26 study in routine clinical practice conditions. *Clin Drug Investig* 2015;35(12):795-805.  
27  
28 doi: 10.1007/s40261-015-0342-2  
29  
30  
31 43. Sicras-Mainar A, Navarro-Artieda R, Ruiz-Torrejon A, *et al.* Persistence and concomitant  
32  
33 medication in patients with overactive bladder treated with antimuscarinic agents in  
34  
35 primary care. An observational baseline study. *Actas Urol Esp* 2016;40(2):96-101.  
36  
37 doi: 10.1016/j.acuro.2015.09.004  
38  
39  
40 44. Sicras-Mainar A, Rejas-Gutierrez J, Navarro-Artieda R, *et al.* Use of health care  
41  
42 resources and associated costs in non-institutionalized vulnerable elders with  
43  
44 overactive bladder treated with antimuscarinic agents in the usual medical practice.  
45  
46 *Actas Urol Esp* 2014;38(8):530-7. doi: 10.1016/j.acuro.2014.02.001  
47  
48  
49 45. Suehs BT, Davis C, Franks B, *et al.* Effect of potentially inappropriate use of  
50  
51 antimuscarinic medications on healthcare use and cost in individuals with overactive  
52  
53 bladder. *J Am Geriatr Soc* 2016;64(4):779-87. doi: 10.1111/jgs.14030  
54  
55  
56  
57  
58  
59  
60

- 1  
2  
3 46. Wagg A, Compion G, Fahey A, *et al.* Persistence with prescribed antimuscarinic therapy  
4 for overactive bladder: a UK experience. *BJU Int* 2012;110(11):1767-74. doi:  
5 10.1111/j.1464-410X.2012.11023.x  
6  
7  
8  
9  
10 47. Yu YF, Nichol MB, Yu AP, *et al.* Persistence and adherence of medications for chronic  
11 overactive bladder/urinary incontinence in the California Medicaid program. *Value*  
12 *Health* 2005;8(4):495-505. doi: 10.1111/j.1524-4733.2005.00041.x  
13  
14  
15  
16 48. D'Souza AO, Smith MJ, Miller LA, *et al.* Persistence, adherence, and switch rates among  
17 extended-release and immediate-release overactive bladder medications in a  
18 regional managed care plan. *J Manag Care Pharm* 2008;14(3):291-301. doi:  
19 10.18553/jmcp.2008.14.3.291  
20  
21  
22  
23  
24  
25 49. Johnston S, Janning SW, Haas GP, *et al.* Comparative persistence and adherence to  
26 overactive bladder medications in patients with and without diabetes. *Int J Clin Pract*  
27 2012;66(11):1042-51. doi: 10.1111/j.1742-1241.2012.03009.x  
28  
29  
30  
31  
32 50. Kalder M, Pantazis K, Dinas K, *et al.* Discontinuation of treatment using anticholinergic  
33 medications in patients with urinary incontinence. *Obstet Gynecol* 2014;124(4):794-  
34 800. doi: 10.1097/AOG.0000000000000468  
35  
36  
37  
38  
39 51. Manack A, Motsko SP, Haag-Molkenteller C, *et al.* Epidemiology and healthcare  
40 utilization of neurogenic bladder patients in a US claims database. *Neurourol Urodyn*  
41 2011;30(3):395-401. doi: 10.1002/nau.21003  
42  
43  
44  
45  
46 52. Mauseth SA, Skurtveit S, Spigset O. Adherence, persistence and switch rates for  
47 anticholinergic drugs used for overactive bladder in women: data from the Norwegian  
48 Prescription Database. *Acta Obstet Gynecol Scand* 2013;92(10):1208-15. doi:  
49 10.1111/aogs.12196  
50  
51  
52  
53  
54  
55  
56  
57  
58  
59  
60

- 1  
2  
3 53. Sicras-Mainar A, Rejas J, Navarro-Artieda R, *et al.* Antimuscarinic persistence patterns  
4 in newly treated patients with overactive bladder: a retrospective comparative  
5 analysis. *Int Urogynecol J* 2014;25(4):485-92. doi: 10.1007/s00192-013-2250-4  
6  
7  
8  
9  
10 54. Gopal M, Haynes K, Bellamy SL, *et al.* Discontinuation rates of anticholinergic  
11 medications used for the treatment of lower urinary tract symptoms. *Obstet Gynecol*  
12 2008;112(6):1311-8. doi: 10.1097/AOG.0b013e31818e8aa4  
13  
14  
15  
16 55. Chancellor MB, Migliaccio-Walle K, Bramley TJ, *et al.* Long-term patterns of use and  
17 treatment failure with anticholinergic agents for overactive bladder. *Clin Ther*  
18 2013;35(11):1744-51. doi: 10.1016/j.clinthera.2013.08.017  
19  
20  
21  
22  
23 56. Sears CL, Lewis C, Noel K, *et al.* Overactive bladder medication adherence when  
24 medication is free to patients. *J Urol* 2010;183(3):1077-81. doi:  
25 10.1016/j.juro.2009.11.026  
26  
27  
28  
29  
30 57. Pelletier EM, Vats V, Clemens JQ. Pharmacotherapy adherence and costs versus  
31 nonpharmacologic management in overactive bladder. *Am J Manag Care* 2009;15(4  
32 Suppl):S108-14.  
33  
34  
35  
36  
37 58. National Institute for Health and Care Excellence. Mirabegron for treating symptoms of  
38 overactive bladder, 2013.  
39  
40  
41  
42 59. Thompson C, Peveler RC, Stephenson D, *et al.* Compliance with antidepressant  
43 medication in the treatment of major depressive disorder in primary care: a  
44 randomized comparison of fluoxetine and a tricyclic antidepressant. *Am J Psychiatry*  
45 2000;157(3):338-43. doi: 10.1176/appi.ajp.157.3.338  
46  
47  
48  
49  
50  
51 60. Anderson BJ, Vangsness L, Connell A, *et al.* Family conflict, adherence, and glycaemic  
52 control in youth with short duration Type 1 diabetes. *Diabet Med* 2002;19(8):635-42.  
53  
54  
55  
56  
57  
58  
59  
60

- 1  
2  
3 61. Hakimi Z, Nazir J, McCrea C, *et al*. Clinical and economic impact of mirabegron  
4 compared with antimuscarinics for the treatment of overactive bladder in Canada. *J*  
5 *Med Econ* 2017;20(6):614-22. doi: 10.1080/13696998.2017.1294595  
6  
7  
8  
9  
10 62. Wielage RC, Perk S, Campbell NL, *et al*. Mirabegron for the treatment of overactive  
11 bladder: cost-effectiveness from US commercial health-plan and Medicare  
12 Advantage perspectives. *J Med Econ* 2016;19(12):1135-43. doi:  
13 10.1080/13696998.2016.1204307  
14  
15  
16  
17  
18 63. Liao CH, Kuo HC. High satisfaction with direct switching from antimuscarinics to  
19 mirabegron in patients receiving stable antimuscarinic treatment. *Medicine*  
20 *(Baltimore)* 2016;95(45):e4962. doi: 10.1097/MD.0000000000004962  
21  
22  
23  
24  
25 64. Sicras-Mainar A, Rejas J, Navarro-Artieda R, *et al*. Health economics perspective of  
26 fesoterodine, tolterodine or solifenacin as first-time therapy for overactive bladder  
27 syndrome in the primary care setting in Spain. *BMC Urol* 2013;13:51. doi:  
28 10.1186/1471-2490-13-51  
29  
30  
31  
32  
33  
34 65. Drake MJ, Chapple C, Esen AA, *et al*. Efficacy and safety of mirabegron add-on therapy  
35 to solifenacin in incontinent overactive bladder patients with an inadequate response  
36 to initial 4-week solifenacin monotherapy: a randomised double-blind multicentre  
37 phase 3B study (BESIDE). *Eur Urol* 2016;70(1):136-45. doi:  
38 10.1016/j.eururo.2016.02.030  
39  
40  
41  
42  
43  
44  
45  
46  
47  
48  
49  
50  
51  
52  
53  
54  
55  
56  
57  
58  
59  
60

## FIGURE LEGENDS

### **Figure 1** Search strategy and selection of studies presented in the Preferred Reporting Items for Systematic Reviews and Meta-Analyses (PRISMA) flow diagram

\*Studies were excluded for the following reasons: outcome measure(s) of persistence and/or adherence, relevant to this systematic review (such as medication possession rate, proportion of days covered, discontinuation rate), were not presented within the full text of the article (n=17); adherence/persistence data were drawn from surveys, interviews or self-reports (n=13); cohort contained a portion of patients under 18 years of age (who could not be removed or isolated from results/data) (n=7); participants had prior awareness/knowledge of partaking in a study related to OAB medication (ie, open-label extension to a study or prior written consent) (n=6); a full article text was not available (ie, only a conference abstract) or the full text was not in English (n=1); or non-oral OAB medications were included within the presented results (and could not be removed or isolated from results/data) (n=1)

§Three of these studies were identified by reviewing reference lists of included studies and relevant systematic literature reviews

### **Figure 2** Frequency for reported determinants of discontinuation

\*In one study the relationship was not statistically significant

\*\*Includes dose, formulation, race, prior infection, financial burden, prescriber profession, side effects, medication co-payment and polypharmacy

1  
2  
3  
4  
5  
6  
7  
8  
9  
10  
11  
12  
13  
14  
15  
16  
17  
18  
19  
20  
21  
22  
23  
24  
25  
26  
27  
28  
29  
30  
31  
32  
33  
34  
35  
36  
37  
38  
39  
40  
41  
42  
43  
44  
45  
46  
47  
48  
49  
50  
51  
52  
53  
54  
55  
56  
57  
58  
59  
60

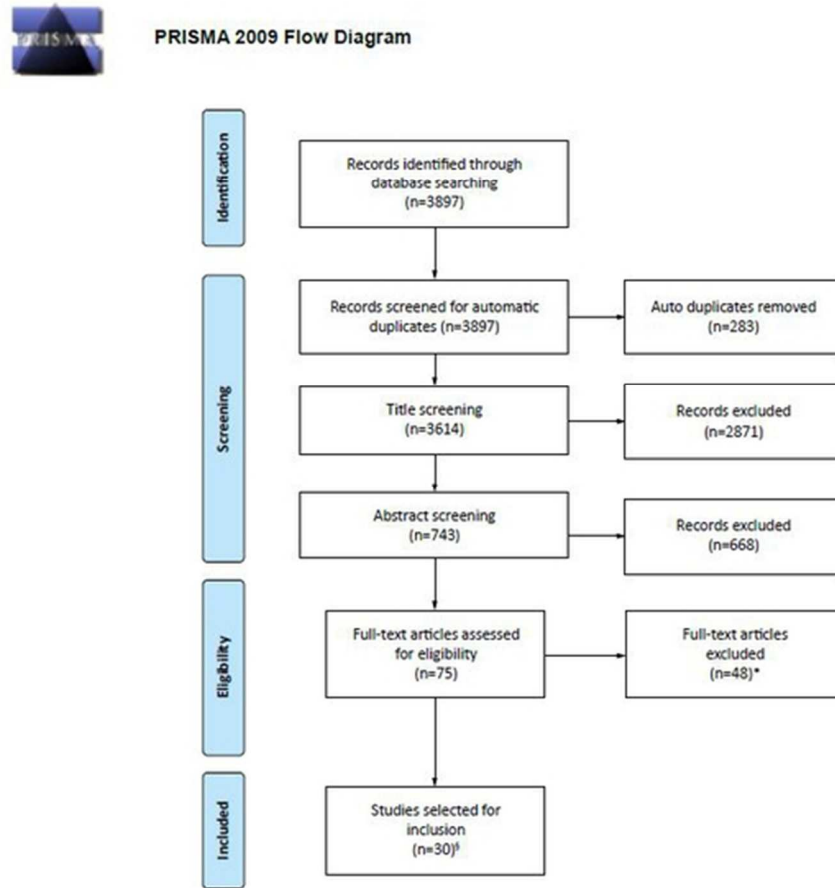

From: Moher D, Liberati A, Tetzlaff J, Altman DG, The PRISMA Group (2009). Preferred Reporting Items for Systematic Reviews and Meta-Analyses: The PRISMA Statement. PLoS Med 6(7): e1000097. doi:10.1371/journal.pmed1000097

For more information, visit [www.prisma-statement.org](http://www.prisma-statement.org).

Figure 1 Search strategy and selection of studies presented in the Preferred Reporting Items for Systematic Reviews and Meta-Analyses (PRISMA) flow diagram

51x57mm (300 x 300 DPI)



1  
2  
3  
4  
5  
6  
7  
8  
9  
10  
11  
12  
13  
14  
15  
16  
17  
18  
19  
20  
21  
22  
23  
24  
25  
26  
27  
28  
29  
30  
31  
32  
33  
34  
35  
36  
37  
38  
39  
40  
41  
42  
43  
44  
45  
46  
47  
48  
49  
50  
51  
52  
53  
54  
55  
56  
57  
58  
59  
60



Figure 2 Frequency for reported determinants of discontinuation

273x182mm (300 x 300 DPI)

view only

**Supplemental Table 1:** Patient characteristics, interventions and definitions/variables of persistence, adherence and discontinuation reported in the studies.

| Author (year) and country (database)                                                                                      | Participants                                                                                                                  | Drug/intervention*                                                                                                                                                                                                                                                                                                                                                                                                       | Definition of persistence/adherence/discontinuation and independent variables on persistence                                                                                                                                                                        | Length of follow-up |
|---------------------------------------------------------------------------------------------------------------------------|-------------------------------------------------------------------------------------------------------------------------------|--------------------------------------------------------------------------------------------------------------------------------------------------------------------------------------------------------------------------------------------------------------------------------------------------------------------------------------------------------------------------------------------------------------------------|---------------------------------------------------------------------------------------------------------------------------------------------------------------------------------------------------------------------------------------------------------------------|---------------------|
| Brostrøm and Hallas (2009) <sup>1</sup><br>Odense University Pharmacoepidemiological Database (OPED); Denmark (1999–2006) | n=2477<br>Male: n=836 (33.8%)<br>Female: n=1641 (66.2%)<br>Mean age: 68.3 years <sup>a</sup>                                  | Any prescription of OAB medication:<br>flavoxate (n=21)<br>oxybutynin TD (n=48)<br>tolterodine (n=1478)<br>solifenacin (n=774)<br>trospium (n=271)<br>darifenacin (n=52)                                                                                                                                                                                                                                                 | Patients who continued taking a particular drug for up to 7 years with no more than 120-day gaps were regarded as experiencing single-treatment episodes<br><br>Variables: age, gender, prior use of OAB agents and use of anti-diabetic drugs                      | Up to 7 years       |
| Chancellor et al (2013) <sup>2</sup><br>IMS Lifelink Database, Connecticut; USA (2005–2008)                               | n=103 250<br>Male: n≈25 916 <sup>a</sup> (25.1%)<br>Female: n≈77 334 <sup>a</sup> (74.9%)<br>Mean (SD) age: 58.7 (15.7) years | First (new) prescription of OAB medication in adults ≥18 years:<br>tolterodine ER (n=43 881) <sup>a</sup><br>solifenacin (n=15 488) <sup>a</sup><br>oxybutynin (n=15 075) <sup>a</sup><br>darifenacin (n=10 532) <sup>a</sup><br>oxybutynin ER (n=10 325) <sup>a</sup><br>oxybutynin TD (n=2272) <sup>a</sup><br>tolterodine (n=2581) <sup>a</sup><br>trospium (n=2478) <sup>a</sup><br>trospium ER (n=413) <sup>a</sup> | To be considered a discontinuation, patients were required to have a gap of at least 45 days in therapy based on fill dates and days' supply<br><br>Adherence rate was defined as the proportion of patients filling more than one prescription with an MPR of ≥80% | 2 years             |
| Chapple et al (2017) <sup>3</sup><br>Clinical Practice Research Datalink (CPRD); UK (2013–2014)                           | n=21 996<br>Male: n=6513 (29.6%)<br>Female: n=15 483 (70.4%)<br>Mean (SD) age: 63.9 (16.3) years                              | First (new) prescription of OAB medication in adults ≥18 years:<br>mirabegron (n=1203)<br>darifenacin (n=126)<br>fesoterodine (n=1287)<br>flavoxate (n=144)<br>oxybutynin ER (n=1144)<br>oxybutynin IR (n=5779)<br>propiverine (n=95)<br>solifenacin (n=8191)<br>tolterodine ER (n=1561)<br>tolterodine IR (n=1523)<br>trospium chloride (n=943)                                                                         | Treatment was defined as discontinued if the maximum allowable gap duration was at least 1.5 times the intended duration of the most recent prescription<br><br>Adherence rate was defined as mean MPR at 12 months                                                 | 1 year              |

| Author (year) and country (database)                                                                             | Participants                                                                                                                               | Drug/intervention*                                                                                                                                                                                        | Definition of persistence/adherence/discontinuation and independent variables on persistence                                                                                                                                                                                                                                                                                                          | Length of follow-up |
|------------------------------------------------------------------------------------------------------------------|--------------------------------------------------------------------------------------------------------------------------------------------|-----------------------------------------------------------------------------------------------------------------------------------------------------------------------------------------------------------|-------------------------------------------------------------------------------------------------------------------------------------------------------------------------------------------------------------------------------------------------------------------------------------------------------------------------------------------------------------------------------------------------------|---------------------|
| D'Souza et al (2008) <sup>4</sup><br>Undisclosed medical claims database; USA (1999–2004)                        | n=1117<br>Male: n≈206 <sup>a</sup> (18.4%)<br>Female: n≈911 <sup>a</sup> (81.6%)<br>Mean (SD) age: 55.7 (14.5) years                       | First index of an OAB medication in adults ≥18 years:<br>oxybutynin ER (n=249)<br>oxybutynin IR (n=108)<br>tolterodine ER (n=454)<br>tolterodine IR (n=306)                                               | Persistence was measured as the proportion of patients continuing therapy for 12 months without discontinuing the index drug or switching to other OAB drugs<br><br>Adherence rate was measured as the proportion of patients with an MPR of ≥0.80<br><br>Variables: age, gender, drug formulations and OAB-associated comorbidities (eg, falls/fractures, skin infections, UTIs, anxiety/depression) | 1 year              |
| Desgagné et al (1999) <sup>5</sup><br>Régie de l'assurance maladie du Québec (RAMQ) database; Canada (1994–1997) | n=6690<br>Male: n=2534 (37.9%)<br>Female: n=4156 (62.1%)<br>Mean age: 77.3 years <sup>a</sup>                                              | Patients aged ≥65 years with at least one prescription claim (first index) of:<br>oxybutynin (n=5718)<br>flavoxate (n=972)                                                                                | Persistence evaluated by percentage of patients refilling their initial prescription                                                                                                                                                                                                                                                                                                                  | Up to 4 years       |
| Gomes et al (2012) <sup>6</sup><br>Canada (Ontario Drug Benefit database of prescriptions)                       | n=56 851 <sup>a</sup><br>Male: n≈18 496 (32.5%) <sup>a</sup><br>Female: n≈38 355 (67.5%) <sup>a</sup><br>Mean age: 77.7 years <sup>a</sup> | Patients aged >65 years with a first index (new) claim of:<br>oxybutynin IR (n=31 996)<br>tolterodine ER/IR (n=24 855)                                                                                    | Persistence with treatment was defined by refills for the index drug within an interval defined by the duration specified on the prescription plus a 50% grace period                                                                                                                                                                                                                                 | 2 years             |
| Gopal et al (2008) <sup>7</sup><br>UK (Health Improvement Network database of prescriptions) (1991–2005)         | n=29 369<br>Male: n=0 (0%)<br>Female: n=29 369 (100%)<br>Mean (SD) age: 63.9 (16.8) years                                                  | Women aged ≥18 years prescribed anti-cholinergic medications:<br>tolterodine IR<br>tolterodine ER<br>oxybutynin IR<br>oxybutynin ER<br>flavoxate<br>terodiline<br>trospium<br>propriverine<br>solifenacin | Discontinuation was defined by no anticholinergic prescriptions issued within 90 days after the end of the last anticholinergic drug prescription<br><br>Anticholinergic medications were considered discontinued at the time a patient switched to another medication or as above<br>Variables: drug formulation                                                                                     | 3 years             |

| Author (year) and country (database)                                                                     | Participants                                                                                                           | Drug/intervention*                                                                                                                                                                                                                                                              | Definition of persistence/adherence/discontinuation and independent variables on persistence                                                                                                                                                                                                                                                                                                                                                                                                                                                                                                                                                           | Length of follow-up |
|----------------------------------------------------------------------------------------------------------|------------------------------------------------------------------------------------------------------------------------|---------------------------------------------------------------------------------------------------------------------------------------------------------------------------------------------------------------------------------------------------------------------------------|--------------------------------------------------------------------------------------------------------------------------------------------------------------------------------------------------------------------------------------------------------------------------------------------------------------------------------------------------------------------------------------------------------------------------------------------------------------------------------------------------------------------------------------------------------------------------------------------------------------------------------------------------------|---------------------|
| Ivanova et al (2014) <sup>8</sup><br>OptumHealth Reporting and Insights claims database; USA (2007–2012) | n=10 318<br>Male: n=2822 (27.4%) <sup>a</sup><br>Female: n=7496 (72.6%) <sup>a</sup><br>Mean age: 51.6 years           | Patients aged 18 to 64 receiving a new prescription of:<br>darifenacin (n=970) <sup>a</sup><br>solifenacin (n=2662) <sup>a</sup><br>oxybutynin (n=2889) <sup>a</sup><br>tolterodine (n=3116) <sup>a</sup><br>trospium (n=454) <sup>a</sup><br>fesoterodine (n=227) <sup>a</sup> | Persisters were defined as patients who did not switch or discontinue the index antimuscarinic during the first 6 months after the treatment initiation date<br><br>Discontinuation was defined by a gap of at least 60 days between refills within the first 6 months after the treatment initiation date<br><br>Switching was defined as a changed prescription from the index antimuscarinic within the first 6 months after the treatment initiation date (with a gap of 60 days between the end of the day supply of the index antimuscarinic and the new antimuscarinic)<br><br>Variables: age, gender, history of UTIs and index antimuscarinic | 6 months            |
| Johnston et al (2012) <sup>9</sup><br>Truven Health MarketScan® Database; USA (2004–2009)                | n=73 120<br>Male: n=29 406 (40.2%)<br>Female: n=43 714 (59.8%)<br>Mean age: 69.0 years <sup>a</sup>                    | First index drug in OAB patients with or without diabetes, aged ≥18 years:<br>darifenacin<br>oxybutynin<br>solifenacin<br>tolterodine<br>trospium                                                                                                                               | Persistence was measured as the number of days from the index date until a gap in OAB medication of ≥45 days<br><br>Adherence was assessed using the interval-based (fixed time-period) MPR (adherent patients had an ≥80% MPR)<br><br>Variables: age, gender and diabetes                                                                                                                                                                                                                                                                                                                                                                             | 1 year              |
| Kalder et al (2014) <sup>10</sup><br>Disease Analyzer database (IMS Health); Germany (2005–2012)         | n=26 834<br>Male: n=9660 <sup>a</sup> (36%)<br>Female: n=17 174 <sup>a</sup> (64%)<br>Mean (SD) age: 69.4 (13.2) years | First index (new) prescription in patients aged ≥18 years:<br>darifenacin (n=1995)<br>fesoterodine (=811)<br>oxybutynin (n=3813)<br>propiverine (n=2714)<br>solifenacin (n=4844)<br>tolterodine (n=1814)<br>trospium (n=10 843)                                                 | Treatment discontinuation was defined as a period of 90 days without prescription of UI therapy but with at least one visit to the same doctor after 90 days<br><br>Variables: age, gender, comorbidity burden (including diabetes) and antimuscarinic side-effects                                                                                                                                                                                                                                                                                                                                                                                    | 3 years             |

| Author (year) and country (database)                                                                                                                  | Participants                                                                                                                                  | Drug/intervention*                                                                                                                                                                                                                   | Definition of persistence/adherence/discontinuation and independent variables on persistence                                                                                                                                                                                                                                                                                                                                                                                                                          | Length of follow-up |
|-------------------------------------------------------------------------------------------------------------------------------------------------------|-----------------------------------------------------------------------------------------------------------------------------------------------|--------------------------------------------------------------------------------------------------------------------------------------------------------------------------------------------------------------------------------------|-----------------------------------------------------------------------------------------------------------------------------------------------------------------------------------------------------------------------------------------------------------------------------------------------------------------------------------------------------------------------------------------------------------------------------------------------------------------------------------------------------------------------|---------------------|
| Kleinman et al (2014) <sup>11</sup><br>Human Capital Management Services [HCMS] Research Reference Database; USA (2001–2011)                          | n=2960<br>Male: n=878 (29.7%)<br>Female: n=2082 (70.3%)<br>Mean age: 46.6 years                                                               | First index of OAB medication in adults aged 18 to 64 years:<br>darifenacin<br>fesoterodine<br>oxybutynin<br>flavoxate <sup>b</sup><br>solifenacin<br>tolterodine<br>trospium<br>hyoscyamine <sup>b</sup><br>imipramine <sup>b</sup> | Persistence was measured as the number of days from index UA prescription until first $\geq 30$ -day gap in UA medication supply<br><br>Adherence was measured as the percentage of the annual post-index period with available medication                                                                                                                                                                                                                                                                            | 1 year              |
| Krhut et al (2014) <sup>12</sup><br>Dept. of Urology and Dept. of Gynaecology and Obstetrics, University Hospital Ostrava; Czech Republic (2009–2010) | n=377<br>Male: n=52 (13.8%)<br>Female: n=325 (86.2%)<br>Mean (SD) age: 60.3 (13.8) years                                                      | First (new) index of OAB medication within patients attending hospital as an outpatient:<br>trospium (n=189)<br>propiverine (n=41)<br>tolterodine ER (n=9)<br>solifenacin (n=48)<br>fesoterodine (n=90)                              | Persistence was assessed according to the patient records                                                                                                                                                                                                                                                                                                                                                                                                                                                             | 1 year              |
| Manack et al (2011) <sup>13</sup><br>Thomson Reuters MarketScan <sup>®</sup> Commercial and Medicare Supplemental Databases; USA (2002–2007)          | n=46 271 <sup>c</sup><br>Male: n=19 727 (42.6%)<br>Female: n=26 544 (57.4%)<br>Mean (SD) age: 62.5 (19.6) years                               | Patients with neurogenic bladder origin (such as spinal cord injury and multiple sclerosis) receiving an oral OAB medication                                                                                                         | Continuation was defined as $\geq 365$ days of OAB oral drug use beginning at the index date with $\leq 90$ days between the end of therapy and end of eligibility<br><br>Discontinuation was defined as $\geq 6$ months of no OAB oral drug use between the end of therapy and the end of eligibility                                                                                                                                                                                                                | 1 year              |
| Mauseth et al (2013) <sup>14</sup><br>The Norwegian Prescription Database; Norway (2004–2010)                                                         | n=32 178<br>Male: n=0 (0.0%)<br>Female: n=32 178 (100.0%)<br>No mean age reported. The majority of patients (60.5%) were aged $\geq 60$ years | Adult patients aged $\geq 18$ years with a first index (new) prescription of:<br>tolterodine (n=12 389)<br>solifenacin (n=13 682)<br>darifenacin (n=4399)<br>fesoterodine (n=1708)                                                   | Persistence defined as the population who had not discontinued the drug during a period of 365 days after the index date<br><br>A switch was defined as a prescription for another of the drugs included in the study within 365 days after the index date<br><br>Adherence was measured using MPR (sum of days of supply for all tablets purchased, except those received at the last fill, divided by the total number of days from the first to the last filling)<br><br>Variables: age and initial antimuscarinic | 1 year              |

| Author (year) and country (database)                                                               | Participants                                                                                               | Drug/intervention*                                                                                                                                        | Definition of persistence/adherence/discontinuation and independent variables on persistence                                                                                                                                                                                                                                                                                         | Length of follow-up |
|----------------------------------------------------------------------------------------------------|------------------------------------------------------------------------------------------------------------|-----------------------------------------------------------------------------------------------------------------------------------------------------------|--------------------------------------------------------------------------------------------------------------------------------------------------------------------------------------------------------------------------------------------------------------------------------------------------------------------------------------------------------------------------------------|---------------------|
| Nitti et al (2016) <sup>15</sup><br>Optum Database; USA<br>(2010–2013)                             | n=2628<br>Male: n=602 (22.9%)<br>Female: n=2026 (77.1%)<br>Mean age: 57.3 years <sup>a</sup>               | New and existing users aged ≥18 years treated with:<br>mirabegron (n=380)<br>tolterodine ER (n=2248)                                                      | Persistence was defined as a continuous supply of index drug until any 30-day period during which the patient did not have a supply of index drug<br><br>Adherence: the proportion of days covered by the prescription was calculated using prescription fill dates and number of days' supply for each fill of a prescription                                                       | 6 months            |
| Pelletier et al (2009) <sup>16</sup><br>PharMetrics Patient-Centric Database; USA<br>(2005–2006)   | n=43 367<br>Male: n=9675 (22.3%)<br>Female: n=33 692 (77.7%)<br>Mean (SD) age: 51.1 (12.4) years           | Adults aged ≥18 years receiving a first index (new) prescription of:<br>tolterodine ER<br>oxybutynin<br>solifenacin<br>darifenacin<br>trospium            | Adherence was measured by PDC over the 12-month post index period (adherent patients had an ≥80% PDC)<br><br>Variables: age, gender and comorbidity burden (including COPD, congestive heart failure, diabetes, hypertension)                                                                                                                                                        | 1 year              |
| Perfetto et al (2005) <sup>17</sup><br>PharMetrics Patient-Centric Database; USA<br>(2001–2003)    | n=23 328<br>No patient demographics were reported                                                          | All patients with either a new diagnosis of OAB or new use of:<br>tolterodine ER<br>oxybutynin ER                                                         | Discontinuation rates were calculated                                                                                                                                                                                                                                                                                                                                                | 11 months           |
| Sears et al (2010) <sup>18</sup><br>Military Health System; USA<br>(2003–2006)                     | n=7858<br>Male: n=2357 (30.0%)<br>Female: n=5501 (70.0%)<br>Age was not reported                           | Military treatment facility enrollees prescribed:<br>oxybutynin ER (n=136)<br>oxybutynin IR (n=2003)<br>tolterodine ER (n=4716)<br>tolterodine IR (n=992) | Non-persistence was defined as patients who never refilled a prescription for any OAB medication during the 3-year study period<br><br>Medication switch rate was calculated as the proportion of patients who changed medication or dose at least once<br><br>Adherence was defined as the proportion of patients with an MPR of ≥80%<br><br>Variables: gender and drug formulation | 3 years             |
| Sicras-Mainar et al (2016) <sup>d,19</sup><br>Primary care medical databases; Spain<br>(2008–2013) | n=3094<br>Male: n≈1170 <sup>a</sup> (37.8%)<br>Female: n≈1924 <sup>a</sup> (62.2%)<br>Mean age: 54.0 years | Adults aged 20 to 64 with a first index (new) prescription of:<br>fesoterodine (n=859)<br>solifenacin (n=1330)<br>tolterodine (n=905)                     | Discontinuation was defined as when the patient switched to another active substance, another drug was added (combination) or the medication was discontinued completely or discontinued for ≥60 days without renewal and ≥2 prescriptions<br><br>Compliance was calculated using MPR<br><br>Variables: concomitant medication (antidepressants, antibiotics) and index drug         | 1 year              |

| Author (year) and country (database)                                                                                   | Participants                                                                                                                                                         | Drug/intervention*                                                                                                                     | Definition of persistence/adherence/discontinuation and independent variables on persistence                                                                                                                                                                                                                                                                                                                                                                               | Length of follow-up |
|------------------------------------------------------------------------------------------------------------------------|----------------------------------------------------------------------------------------------------------------------------------------------------------------------|----------------------------------------------------------------------------------------------------------------------------------------|----------------------------------------------------------------------------------------------------------------------------------------------------------------------------------------------------------------------------------------------------------------------------------------------------------------------------------------------------------------------------------------------------------------------------------------------------------------------------|---------------------|
| Sicras-Mainar et al (2015) <sup>d,20</sup><br>Primary care medical databases; Spain (2008–2013)                        | n=3094<br>Male: n≈1170 <sup>a</sup> (37.8%)<br>Female: n≈1924 <sup>a</sup> (62.2%)<br>Mean (SD) age: 54.0 (9.2) years                                                | Adults aged ≥20 years with a first index (new) prescription of:<br>fesoterodine (n=859)<br>solifenacin (n=1330)<br>tolterodine (n=905) | Persistence was defined as the time, measured in months, without stopping the initial treatment or switching to another medication at least 30 days after the initial prescription<br><br>Compliance was defined according to ISPOR criteria and was calculated based on the MPR, which was evaluated from the first to the last prescription and represented the number of days of medication taken over the number of days in treatment (commencing from the start date) | 1 year              |
| Sicras-Mainar et al (2014a) <sup>21</sup><br>Primary care medical databases; Spain (2008–2010)                         | n=552<br>Male: n≈272 <sup>a</sup> (49.2%)<br>Female: n≈280 <sup>a</sup> (50.8%)<br>Mean (SD) age: 80.2 (4.0) years                                                   | Adults aged ≥75 years with a first index (new) prescription of:<br>fesoterodine (n=58)<br>solifenacin (n=252)<br>tolterodine (n=212)   | Persistence was defined as the time, in weeks, with no drop-out from initial treatment or with no switch to another medication at least 30 days following initial prescription<br><br>Compliance was defined according to ISPOR criteria and was calculated based on the medication use/possession rate                                                                                                                                                                    | 1 year              |
| Sicras-Mainar et al (2014b) <sup>e,22</sup><br>Primary care medical databases; Spain (2008–2010)                       | n=1971<br>Male: n=821 (41.7%)<br>Female: n=1150 (58.3%)<br>Mean (SD) age: 70.1 (10.6) years                                                                          | Adults aged ≥18 years with a first index (new) prescription of:<br>fesoterodine (n=302)<br>solifenacin (n=952)<br>tolterodine (n=717)  | Discontinuation was defined by either the absence of prescription coverage for the initial therapy for the remainder of the 52-week follow-up period or a switch to an alternative antimuscarinic during this time-period<br><br>Variables: index drug                                                                                                                                                                                                                     | 1 year              |
| Sicras-Mainar et al (2013) <sup>e,23</sup><br>Primary care medical databases; Spain (2008–2010)                        | n=1971<br>Male: n=821 (41.7%)<br>Female: n=1150 (58.3%)<br>Mean (SD) age: 70.1 (10.6) years                                                                          | Adults aged ≥18 years with a first index (new) prescription of:<br>fesoterodine (n=302)<br>solifenacin (n=952)<br>tolterodine (n=717)  | Persistence was defined as patients who remained on treatment during the 52-week period following the index date<br><br>Compliance was defined according to ISPOR criteria and was calculated based on the MPR                                                                                                                                                                                                                                                             | 1 year              |
| Suehs et al (2016) <sup>24</sup><br>Medicare Advantage Prescription Plan - Administrative Claims Data; USA (2007–2013) | n=46 140 <sup>a</sup><br>Male: n=15 479 <sup>a</sup> (33.5%) <sup>a</sup><br>Female: n=30 661 <sup>a</sup> (66.5%) <sup>a</sup><br>Mean age: 75.5 years <sup>a</sup> | Adults aged 65 to 89 years <sup>f</sup> with a first index (new) prescription of any antimuscarinic OAB medication                     | Persistence was assessed as time in days from the index date to discontinuation of index antimuscarinic treatment<br><br>Adherence was assessed as PDC with the index OAB treatment over three predefined post index observation periods: 3, 6, and 12 months<br><br>Treatment discontinuation was identified using a permissible gap between refills of 15 days                                                                                                           | 1 year              |

| Author (year) and country (database)                                                                                           | Participants                                                                                                                                                                       | Drug/intervention*                                                                                                                                                                                                     | Definition of persistence/adherence/discontinuation and independent variables on persistence                                                                                                                                                                                                                                                                                                                                                         | Length of follow-up |
|--------------------------------------------------------------------------------------------------------------------------------|------------------------------------------------------------------------------------------------------------------------------------------------------------------------------------|------------------------------------------------------------------------------------------------------------------------------------------------------------------------------------------------------------------------|------------------------------------------------------------------------------------------------------------------------------------------------------------------------------------------------------------------------------------------------------------------------------------------------------------------------------------------------------------------------------------------------------------------------------------------------------|---------------------|
| Sussman et al (2017) <sup>25</sup><br>Truven MarketScan®<br>Claims Database; USA<br>(2012–2013)                                | n=71 980 <sup>a</sup><br>Male: n=21 225 <sup>a</sup> (29.5%) <sup>a</sup><br>Female: n=50 755 <sup>a</sup> (70.5%) <sup>a</sup><br>Mean age: 62.3 years <sup>a</sup>               | Adults aged ≥18 years with a prescription of:<br>mirabegron<br>any anticholinergic OAB medication                                                                                                                      | Persistence was measured by evaluating treatment failure (defined as either treatment discontinuation or treatment switching). A medication supply gap of ≥30 days was used to define treatment discontinuation<br><br>Adherence was defined as the PDC (ie, the number of days covered by the index therapy divided by the number of days between the index date and the end of the follow-up [365 days]). A PDC of <80% was considered nonadherent | 1 year              |
| Wagg et al (2012) <sup>26</sup><br>Prescription Database;<br>UK (2007–2008)                                                    | n=4833<br>Demographics were not explicitly reported, the majority of prescriptions appeared to be issued to patients aged ≥60 years                                                | Adults aged ≥40 years with a first index (new) prescription of:<br>darifenacin<br>flavoxate<br>oxybutynin ER<br>oxybutynin IR<br>propiverine<br>solifenacin<br>tolterodine ER<br>tolterodine IR<br>trospium            | Persistence was defined as the mean time [in days] until discontinuation (a gap in treatment exceeding 1.5 times than the length of the previous prescription without a refill)                                                                                                                                                                                                                                                                      | 1 year              |
| Wagg et al (2015) <sup>27</sup><br>Canadian National<br>Private Drug Plan<br>Database; Canada<br>(2013)                        | n=19 485<br>Male: n=4992 (25.6%) <sup>a</sup><br>Female: n=14 493 (74.3%) <sup>a</sup><br>Mean age not reported; the majority of patients (77.8%) <sup>a</sup> were aged ≥46 years | Adults aged ≥18 years with a first index (new) prescription of:<br>mirabegron (n=1683)<br>fesoterodine (n=1415)<br>oxybutynin ER (n=1260)<br>oxybutynin IR (n=5356)<br>solifenacin (n=6032)<br>tolterodine ER (n=3739) | Adherence was defined by the MPR over 1 year<br><br>To calculate time to end of persistence (defined by a gap in therapy of ≥30 days or switching to another medication), prescription claims for a target drug were tracked for 12 months after the index claim date<br><br>Variables: age, gender, treatment-naïve vs treatment-experienced, index antimuscarinic, number of coexisting medications                                                | 1 year              |
| Wagg et al (2015) <sup>28</sup><br>IMS Brogan public and<br>private prescription<br>claims databases;<br>Canada<br>(2007–2012) | n=31 707<br>Male: n=9395 (29.6%) <sup>a</sup><br>Female: n=22 312 (70.4%) <sup>a</sup><br>Mean age not reported                                                                    | Adult patients receiving a first index (new) prescription of:<br>oxybutynin IR<br>oxybutynin ER<br>tolterodine IR<br>tolterodine ER<br>solifenacin<br>darifenacin<br>trospium<br>flavoxate                             | Discontinuation was defined as patients experiencing a gap in therapy longer than 60 days                                                                                                                                                                                                                                                                                                                                                            | 4 years             |



| Author (year) and country (database)                                                                  | Participants                                                                                  | Drug/intervention*                                                                                                                                                                  | Definition of persistence/adherence/discontinuation and independent variables on persistence                                                                                                                                                                                                                                                                                                                                                                                                                                                                                                                                                                                                    | Length of follow-up |
|-------------------------------------------------------------------------------------------------------|-----------------------------------------------------------------------------------------------|-------------------------------------------------------------------------------------------------------------------------------------------------------------------------------------|-------------------------------------------------------------------------------------------------------------------------------------------------------------------------------------------------------------------------------------------------------------------------------------------------------------------------------------------------------------------------------------------------------------------------------------------------------------------------------------------------------------------------------------------------------------------------------------------------------------------------------------------------------------------------------------------------|---------------------|
| Yeaw et al (2009) <sup>29</sup><br>PharMetrics Patient-Centric Database (pharmacy claims); USA (2005) | n=7722<br>Male: n=1686 (21.8%)<br>Female: n=6036 (78.2%)<br>Mean (SD) age: 43.7 (18.3) years  | Adult patients receiving a first index (new) prescription of:<br>tolterodine<br>oxybutynin<br>solifenacin<br>darifenacin<br>trospium<br>bethanechol<br>flavoxate<br>hyoscyamine     | Persistence was calculated for the post-index period until the patient discontinued therapy, was lost to follow-up due to disenrollment from the health plan (minimum of 12 months), or the maximum 24-month follow-up period ended, whichever event occurred first. A patient was considered persistent until an excessive gap in days supplied occurred; refill gaps of 30, 60, and 90 days were used to calculate persistence for all cohorts<br><br>Adherence was measured using the PDC for each of the six drug class cohorts. This was calculated by taking patients' total days supplied of index class medications for the 360-day period following the index date and dividing by 360 | 2 years             |
| Yu et al (2015) <sup>30</sup><br>California Medi-Cal administrative files; USA (1999–2002)            | n=2496<br>Male: n=534 (21.4%)<br>Female: n=1962 (78.6%)<br>Mean (SD) age: 63.15 (16.14) years | Adult patients aged ≥18 years receiving a prescription of an OAB drug, including:<br>tolterodine (n=1093)<br>oxybutynin ER (n=524)<br>oxybutynin (n=812)<br>other OAB agents (n=67) | Persistence was measured by the length of continuous pharmacological treatment (patients discontinued their treatment if they failed to refill OAB/UI agents within 30 days after the expected end date of the previous prescription)<br><br>Patients who switched from one agent of OAB/UI drug to another within 30 days were considered persistent on therapy.<br><br>Adherence was defined as MPR over 181 days for the 6-month follow-up period<br><br>Variables: age, gender, ethnicity, index drug, OAB-associated comorbidities (UTIs), medication use history, length of hospital stay and number of drug classes prescribed                                                           | 1 year              |

COPD = chronic obstructive pulmonary disease; ER = extended release; ISPOR = International Society for Pharmacoeconomics and Outcomes Research; IR = immediate release; MPR = medication possession ratio (measured as the proportion of days with any OAB medication on hand, over the length of the evaluation period); OAB = overactive bladder; PDC = proportion of days covered; PIM = potentially inappropriate medication; SD = standard deviation; TD = transdermal; UA = urinary antispasmodic; UI = urinary incontinence; UTIs = urinary tract infections

\*The sum of the patients prescribed individual drugs may not match the total number of patients perhaps due to switching in some studies

<sup>a</sup>Calculated from data presented in the article; <sup>b</sup>used only in an OAB context; <sup>c</sup>26 922 continued, discontinued or restarted an OAB medication in the study period, but no demographics for this specific sub-group are reported; <sup>d</sup>Sicras-Mainar et al (2016)<sup>19</sup> and Sicras-Mainar et al (2015)<sup>20</sup> relate to the same patient group in terms of demographics and the timeframe/geographical source of adherence/persistence data; <sup>e</sup>Sicras-Mainar et al (2014)<sup>22</sup> and Sicras-Mainar et al (2013)<sup>23</sup> relate to the same patient group in terms of demographics and the timeframe/geographical source of adherence/persistence data; <sup>f</sup>this cohort was split into two groups – patients who were assigned OAB medication appropriately [non-PIM], or potentially inappropriately [PIM]. Inappropriateness was defined as patients having “drug–disease or syndrome interaction or indication of significant anticholinergic medication burden at the time of initiation of an antimuscarinic OAB treatment”

## References

1. Brostrom S, Hallas J: Persistence of antimuscarinic drug use. *Eur J Clin Pharmacol* 2009; **65**: 309.
2. Chancellor MB, Yehoshua A, Waweru C et al: Limitations of anticholinergic cycling in patients with overactive bladder (OAB) with urinary incontinence (UI): results from the CONsequences of Treatment Refractory Overactive bLadder (CONTROL) study. *Int Urol Nephrol* 2016; **48**: 1029.
3. Chapple CR, Nazir J, Hakimi Z et al: Persistence and adherence with mirabegron versus antimuscarinic agents in patients with overactive bladder: a retrospective observational study in UK clinical practice. *Eur Urol* 2017; **72**: 389.
4. D'Souza AO, Smith MJ, Miller LA et al: Persistence, adherence, and switch rates among extended-release and immediate-release overactive bladder medications in a regional managed care plan. *J Manag Care Pharm* 2008; **14**: 291.
5. Desgagne A, LeLorier J: Incontinence drug utilization patterns in Quebec, Canada. *Value Health* 1999; **2**: 452.
6. Gomes T, Juurlink DN, Mamdani MM: Comparative adherence to oxybutynin or tolterodine among older patients. *Eur J Clin Pharmacol* 2012; **68**: 97.
7. Gopal M, Haynes K, Bellamy SL et al: Discontinuation rates of anticholinergic medications used for the treatment of lower urinary tract symptoms. *Obstet Gynecol* 2008; **112**: 1311.
8. Ivanova JI, Hayes-Larson E, Sorg RA et al: Healthcare resource use and costs of privately insured patients who switch, discontinue, or persist on anti-muscarinic therapy for overactive bladder. *J Med Econ* 2014; **17**: 741.
9. Johnston S, Janning SW, Haas GP et al: Comparative persistence and adherence to overactive bladder medications in patients with and without diabetes. *Int J Clin Pract* 2012; **66**: 1042.
10. Kalder M, Pantazis K, Dinas K et al: Discontinuation of treatment using anticholinergic medications in patients with urinary incontinence. *Obstet Gynecol* 2014; **124**: 794.
11. Kleinman NL, Odell K, Chen CI et al: Persistence and adherence with urinary antispasmodic medications among employees and the impact of adherence on costs and absenteeism. *J Manag Care Spec Pharm* 2014; **20**: 1047.
12. Krhut J, Gartner M, Petzel M et al: Persistence with first line anticholinergic medication in treatment-naive overactive bladder patients. *Scand J Urol* 2014; **48**: 79.
13. Manack A, Motsko SP, Haag-Molkenteller C et al: Epidemiology and healthcare utilization of neurogenic bladder patients in a US claims database. *Neurourol Urodyn* 2011; **30**: 395.
14. Mauseth SA, Skurtveit S, Spigset O: Adherence, persistence and switch rates for anticholinergic drugs used for overactive bladder in women: data from the Norwegian Prescription Database. *Acta Obstet Gynecol Scand* 2013; **92**: 1208.
15. Nitti VM, Rovner ES, Franks B et al: Persistence with mirabegron versus tolterodine in patients with overactive bladder. *Am J Pharm Benefits* 2016; **8**: e25.
16. Pelletier EM, Vats V, Clemens JQ: Pharmacotherapy adherence and costs versus nonpharmacologic management in overactive bladder. *Am J Manag Care* 2009; **15**: S108.
17. Perfetto EM, Subedi P, Jumadilova Z: Treatment of overactive bladder: a model comparing extended-release formulations of tolterodine and oxybutynin. *Am J Manag Care* 2005; **11**: S150.
18. Sears CL, Lewis C, Noel K et al: Overactive bladder medication adherence when medication is free to patients. *J Urol* 2010; **183**: 1077.

19. Sicras-Mainar A, Navarro-Artieda R, Ruiz-Torrejon A et al: Persistence and concomitant medication in patients with overactive bladder treated with antimuscarinic agents in primary care. An observational baseline study. *Actas Urol Esp* 2016; **40**: 96.
20. Sicras-Mainar A, Navarro-Artieda R, Ruiz-Torrejon A et al: Impact of loss of work productivity in patients with overactive bladder treated with antimuscarinics in Spain: study in routine clinical practice conditions. *Clin Drug Investig* 2015; **35**: 795.
21. Sicras-Mainar A, Rejas-Gutierrez J, Navarro-Artieda R et al: Use of health care resources and associated costs in non-institutionalized vulnerable elders with overactive bladder treated with antimuscarinic agents in the usual medical practice. *Actas Urol Esp* 2014; **38**: 530.
22. Sicras-Mainar A, Rejas J, Navarro-Artieda R et al: Antimuscarinic persistence patterns in newly treated patients with overactive bladder: a retrospective comparative analysis. *Int Urogynecol J* 2014; **25**: 485.
23. Sicras-Mainar A, Rejas J, Navarro-Artieda R et al: Health economics perspective of fesoterodine, tolterodine or solifenacin as first-time therapy for overactive bladder syndrome in the primary care setting in Spain. *BMC Urol* 2013; **13**: 51.
24. Suehs BT, Davis C, Franks B et al: Effect of potentially inappropriate use of antimuscarinic medications on healthcare use and cost in individuals with overactive bladder. *J Am Geriatr Soc* 2016; **64**: 779.
25. Sussman D, Yehoshua A, Kowalski J et al: Adherence and persistence of mirabegron and anticholinergic therapies in patients with overactive bladder: a real-world claims data analysis. *Int J Clin Pract* 2017; **71**: e12824.
26. Wagg A, Compion G, Fahey A et al: Persistence with prescribed antimuscarinic therapy for overactive bladder: a UK experience. *BJU Int* 2012; **110**: 1767.
27. Wagg A, Franks B, Ramos B et al: Persistence and adherence with the new beta-3 receptor agonist, mirabegron, versus antimuscarinics in overactive bladder: early experience in Canada. *Can Urol Assoc J* 2015; **9**: 343.
28. Wagg A, Diles D, Berner T: Treatment patterns for patients on overactive bladder therapy: a retrospective statistical analysis using Canadian claims data. *JHEOR* 2015; **3**: 43.
29. Yeaw J, Benner JS, Walt JG et al: Comparing adherence and persistence across 6 chronic medication classes. *J Manag Care Pharm* 2009; **15**: 728.
30. Yu YF, Nichol MB, Yu AP et al: Persistence and adherence of medications for chronic overactive bladder/urinary incontinence in the California Medicaid program. *Value Health* 2005; **8**: 495.

**Supplemental Table 2.** Summary of adherence and persistence rates and determinants

| Author (year)                           | Persistence*                                                                                                                                                                                                                                                                                                                                                                                                                                                                                                                                               | Adherence*                                                                                                                                                                                                                                                                                                             | Determinants of persistence and adherence                                                                                                                                                                                           |
|-----------------------------------------|------------------------------------------------------------------------------------------------------------------------------------------------------------------------------------------------------------------------------------------------------------------------------------------------------------------------------------------------------------------------------------------------------------------------------------------------------------------------------------------------------------------------------------------------------------|------------------------------------------------------------------------------------------------------------------------------------------------------------------------------------------------------------------------------------------------------------------------------------------------------------------------|-------------------------------------------------------------------------------------------------------------------------------------------------------------------------------------------------------------------------------------|
| Brostrøm and Hallas (2009) <sup>1</sup> | <p>Proportion of patients continued (all drugs except trospium chloride):</p> <p>&lt;50% at 6 months</p> <p>&lt;25% at 1 year</p> <p>&lt;10% at ≥2 years</p> <p>Proportion of patients continued trospium:</p> <p>46% at 6 months</p> <p>36% at 1 year</p> <p>22% at 2 years</p> <p>16% at 3 years</p>                                                                                                                                                                                                                                                     | Not reported                                                                                                                                                                                                                                                                                                           | <p><b>Gender, age, medication dose, treatment status, medication type</b></p> <p>Retention was longer: in females; in older people; with higher doses; with previous experience of other OAB drugs; trospium vs other OAB drugs</p> |
| Chancellor et al (2013) <sup>2</sup>    | <p>Proportion of patients discontinued at 2 years:<sup>a</sup></p> <p>tolterodine ER: 84.7%</p> <p>solifenacin: 85.2%</p> <p>oxybutynin: 91.1%</p> <p>darifenacin: 85.7%</p> <p>oxybutynin ER: 84.0%</p> <p>tolterodine: 85.1%</p> <p>trospium: 88.1%</p> <p>trospium ER: 87.1%</p> <p>Proportion of patient switched at 2 years:<sup>a</sup></p> <p>tolterodine ER: 5.7%</p> <p>solifenacin: 5.2%</p> <p>oxybutynin: 4.7%</p> <p>darifenacin: 6.0%</p> <p>oxybutynin ER: 6.7%</p> <p>tolterodine: 9.7%</p> <p>trospium: 6.9%</p> <p>trospium ER: 6.4%</p> | <p>Proportion of patients with MPR ≥0.80 over study period (in those filling &gt;1 prescription):</p> <p>tolterodine ER: 51.1%</p> <p>solifenacin: 49.4%</p> <p>oxybutynin: 30.1%</p> <p>darifenacin: 51.9%</p> <p>oxybutynin ER: 51.8%</p> <p>tolterodine: 42.6%</p> <p>trospium: 42.4%</p> <p>trospium ER: 54.3%</p> | Not reported                                                                                                                                                                                                                        |

| Author (year)                     | Persistence*                                                                                                                                                                                                                                                                                                                                                                                                                                                                                                             | Adherence*                                                                                                                                                                                                                                                                                                                                                                                                                                                                                                                                                                                            | Determinants of persistence and adherence                                                                                                                                                                                                                                                                                                                                                                                                                                                                                       |
|-----------------------------------|--------------------------------------------------------------------------------------------------------------------------------------------------------------------------------------------------------------------------------------------------------------------------------------------------------------------------------------------------------------------------------------------------------------------------------------------------------------------------------------------------------------------------|-------------------------------------------------------------------------------------------------------------------------------------------------------------------------------------------------------------------------------------------------------------------------------------------------------------------------------------------------------------------------------------------------------------------------------------------------------------------------------------------------------------------------------------------------------------------------------------------------------|---------------------------------------------------------------------------------------------------------------------------------------------------------------------------------------------------------------------------------------------------------------------------------------------------------------------------------------------------------------------------------------------------------------------------------------------------------------------------------------------------------------------------------|
| Chapple et al (2017) <sup>3</sup> | Median time to discontinuation (days):<br>mirabegron: 169<br>darifenacin: 56<br>fesoterodine: 78<br>flavoxate: 30<br>oxybutynin ER: 60<br>oxybutynin IR: 35<br>propiverine: 56<br>solifenacin: 67<br>tolterodine ER: 56<br>trospium chloride: 60<br><br>Proportion of patients persistent at 1 year:<br>mirabegron: 38%<br>darifenacin: 16%<br>fesoterodine: 24%<br>flavoxate: 8.3%<br>oxybutynin ER: 17%<br>oxybutynin IR: 12%<br>propiverine: 21%<br>solifenacin: 25%<br>tolterodine ER: 21%<br>trospium chloride: 19% | Mean (SD) MPR at 1 year:<br>mirabegron: 0.59 (0.33)<br>darifenacin: 0.46 (0.34)<br>fesoterodine: 0.53 (0.33)<br>flavoxate: 0.44 (0.32)<br>oxybutynin ER: 0.49 (0.32)<br>oxybutynin IR: 0.41 (0.32)<br>propiverine: 0.51 (0.32)<br>solifenacin: 0.53 (0.34)<br>tolterodine ER: 0.50 (0.34)<br>trospium chloride: 0.48 (0.33)<br><br>Proportion of patients with MPR ≥0.8 at 1 year:<br>mirabegron: 43%<br>darifenacin: 29%<br>fesoterodine: 35%<br>flavoxate: 24%<br>oxybutynin ER: 31%<br>oxybutynin IR: 22%<br>propiverine: 25%<br>solifenacin: 35%<br>tolterodine ER: 32%<br>trospium chloride: 29% | <b>Medication type</b><br>Mirabegron was associated with a statistically significantly greater median time to discontinuation (adjusted HR range 1.31–2.31; p<0.0001 all comparisons) and 12-month persistence rates (adjusted OR range 0.18–0.71; p≤0.0001 all comparisons) vs antimuscarinics in all patients<br><br>The mean MPR with mirabegron was significantly greater vs antimuscarinics in all patients (p values 0.03 to <0.0001), and in treatment-naïve subcohorts, except for flavoxate (p values 0.02 to <0.0001) |

| Author (year)                      | Persistence*                                                                                                                                                                                                                                                                                                                                                                                                                                                                                                                                                                                                                                                                                             | Adherence*   | Determinants of persistence and adherence                                                                                                                                                                                                                                                                                                                                                                                                                                                                                                                                                                                                                                                               |
|------------------------------------|----------------------------------------------------------------------------------------------------------------------------------------------------------------------------------------------------------------------------------------------------------------------------------------------------------------------------------------------------------------------------------------------------------------------------------------------------------------------------------------------------------------------------------------------------------------------------------------------------------------------------------------------------------------------------------------------------------|--------------|---------------------------------------------------------------------------------------------------------------------------------------------------------------------------------------------------------------------------------------------------------------------------------------------------------------------------------------------------------------------------------------------------------------------------------------------------------------------------------------------------------------------------------------------------------------------------------------------------------------------------------------------------------------------------------------------------------|
| Desgagné et al (1999) <sup>4</sup> | <p>Proportion of patients refilled initial prescription:</p> <p>Short-term<sup>b</sup>;</p> <p>oxybutynin: 39.3%</p> <p>flavoxate: 36.6%</p> <p>Long-term<sup>c</sup>;</p> <p>oxybutynin: 63.9%</p> <p>flavoxate: 55.5%</p> <p>Proportion of patients discontinued at 3 months:</p> <p>oxybutynin: 78%</p> <p>flavoxate: 83%</p> <p>Proportion of patients discontinued at 6-months:</p> <p>oxybutynin: 89%</p> <p>flavoxate: 94%</p> <p>Proportion of patients switched at 4-years:</p> <p>Patients without renewal of the original claim:</p> <p>oxybutynin: 1.3%</p> <p>flavoxate: 3.1%</p> <p>Patients with any number of renewals before switch:</p> <p>oxybutynin: 2.2%</p> <p>flavoxate: 5.9%</p> | Not reported | <p><b>Age</b></p> <p>Compared with patients aged &lt;77.5 years, those who were older were less likely to discontinue vs:</p> <p>77.5–83.5 years: RR 0.90, 95% CI 0.85–0.96, p&lt;0.001</p> <p>&gt;83.5 years: RR 0.86, 95% CI 0.81–0.92, p&lt;0.001</p> <p><b>Medication dose</b></p> <p>Higher quantity of tablets per day (2–4 tablets/day) was associated with increased risk of early discontinuation, compared with low daily quantity (1 tablet per day) (RR 1.45, 95% CI 1.37–1.53, p&lt;0.001)</p> <p><b>Medication type</b></p> <p>Patients receiving flavoxate had an increased risk of discontinuation compared with those receiving oxybutynin (RR 1.13, 95% CI 1.05–1.22, p&lt;0.001)</p> |

| Author (year)                     | Persistence*                                                                                                                                                                                                                                                                                                                                                                                                                                                                                                                                                                                                                                                                                                                                                                               | Adherence*                                                                                                                                                                                                       | Determinants of persistence and adherence                                                                                                                                                                                                                                                                                                              |
|-----------------------------------|--------------------------------------------------------------------------------------------------------------------------------------------------------------------------------------------------------------------------------------------------------------------------------------------------------------------------------------------------------------------------------------------------------------------------------------------------------------------------------------------------------------------------------------------------------------------------------------------------------------------------------------------------------------------------------------------------------------------------------------------------------------------------------------------|------------------------------------------------------------------------------------------------------------------------------------------------------------------------------------------------------------------|--------------------------------------------------------------------------------------------------------------------------------------------------------------------------------------------------------------------------------------------------------------------------------------------------------------------------------------------------------|
| D'Souza et al (2008) <sup>5</sup> | <p>Proportion of patients persistent at 1 year (without a gap &gt;45 days):</p> <p>oxybutynin ER: 15.3%</p> <p>oxybutynin IR: 6.5%</p> <p>tolterodine ER: 15.0%</p> <p>tolterodine IR: 11.4%</p> <p>overall: 13.2%</p> <p>Proportion of patients not refilled index medication:</p> <p>oxybutynin ER: 39.4%</p> <p>oxybutynin IR: 59.3%</p> <p>tolterodine ER: 42.7%</p> <p>tolterodine IR: 46.1%</p> <p>overall: 44.5%</p> <p>Median time to discontinuation (days):</p> <p>oxybutynin ER: 34</p> <p>oxybutynin IR: 0</p> <p>tolterodine IR: 32</p> <p>tolterodine ER: 33</p> <p>overall: 31</p> <p>Proportion of patients switched at 1 year:</p> <p>oxybutynin ER: 16.5%</p> <p>oxybutynin IR: 19.4%</p> <p>tolterodine IR: 13.7%</p> <p>tolterodine ER: 9.9%</p> <p>overall: 13.3%</p> | <p>Proportion of patients with MPR <math>\geq 0.80</math> at 1 year:</p> <p>oxybutynin ER: 36.1%</p> <p>oxybutynin IR: 14.8%</p> <p>tolterodine ER: 35.2%</p> <p>tolterodine IR: 23.5%</p> <p>overall: 30.3%</p> | <p><b>Medication formulation</b></p> <p>Adherence with IR drugs approximately half that for ER drugs (OR 0.504, 95% CI 0.306–0.704, <math>p &lt; 0.001</math>)</p> <p><b>Age</b></p> <p>Patients aged <math>\geq 65</math> years were 1.5 times more likely to achieve an MPR <math>\geq 0.80</math> than patients aged <math>&lt; 65</math> years</p> |

| Author (year)                   | Persistence*                                                                                                                                                                                                                                                                                                                                                    | Adherence*   | Determinants of persistence and adherence                                                                                                     |
|---------------------------------|-----------------------------------------------------------------------------------------------------------------------------------------------------------------------------------------------------------------------------------------------------------------------------------------------------------------------------------------------------------------|--------------|-----------------------------------------------------------------------------------------------------------------------------------------------|
| Gomes et al (2012) <sup>6</sup> | Median time to discontinuation (days):<br>oxybutynin: 68<br>tolterodine: 128<br><br>Proportion of patients persistent at:<br>6 months<br>oxybutynin: 30.6%<br>tolterodine: 42.9%<br><br>1 year<br>oxybutynin: 18.9%<br>tolterodine: 27.3%<br><br>18 months<br>oxybutynin: 13.1%<br>tolterodine: 18.9%<br><br>2 years:<br>oxybutynin: 9.4%<br>tolterodine: 13.6% | Not reported | <b>Medication type</b><br>Over the 2-year follow-up, the time to discontinuation was longer with tolterodine than oxybutynin ( $p < 0.0001$ ) |

For peer review only



| Author (year)                   | Persistence*                                                                                                                                                                                                                                                                                                                                                                                                                                                                                                                                                                                                                                                                                                                                                                                                                                                                                                                                                                                                                                                                                                                                                                                                                       | Adherence*   | Determinants of persistence and adherence                                                                                                                                                                                                                                                                                                                                                                                                                                                                                                                                                                                                                                         |
|---------------------------------|------------------------------------------------------------------------------------------------------------------------------------------------------------------------------------------------------------------------------------------------------------------------------------------------------------------------------------------------------------------------------------------------------------------------------------------------------------------------------------------------------------------------------------------------------------------------------------------------------------------------------------------------------------------------------------------------------------------------------------------------------------------------------------------------------------------------------------------------------------------------------------------------------------------------------------------------------------------------------------------------------------------------------------------------------------------------------------------------------------------------------------------------------------------------------------------------------------------------------------|--------------|-----------------------------------------------------------------------------------------------------------------------------------------------------------------------------------------------------------------------------------------------------------------------------------------------------------------------------------------------------------------------------------------------------------------------------------------------------------------------------------------------------------------------------------------------------------------------------------------------------------------------------------------------------------------------------------|
| Gopal et al (2008) <sup>7</sup> | <p data-bbox="376 252 909 304">Over 3 years, 91% of 49,419 episodes of medication prescription resulted in discontinuation</p> <p data-bbox="376 331 909 411">Cumulative incidence of discontinuation at 6 months, 1 year, 2 years and 3 years (unadjusted):<br/>Overall: 58.8, 77.2, 87.5, 92.0%</p> <p data-bbox="376 438 909 778">Cumulative incidence of discontinuation, at 6 months, 1 year, 2 years and 3 years (adjusted for age, year of initiation, switch, number of previous drug classes, number of prior episodes and smoking status):<br/>oxybutynin: 71, 86, 94, 96%<br/>oxybutynin ER: 57, 80, 93, 97%<br/>tolterodine: 61, 81, 92, 95%<br/>tolterodine ER: 54, 76, 91, 97%<br/>trospium: 56, 80, 94, 98%<br/>propiverine: 61, 84, 95, 98%<br/>solifenacin: 53, 91, 98, 99%<br/>terodiline: 89, 99%, N/A, N/A<br/>flavoxate: 85, 96, 99, 99%</p> <p data-bbox="376 805 909 1098">Median time to discontinuation (months):<br/>oxybutynin: 4.67<br/>oxybutynin ER: 5.13<br/>tolterodine: 5.47<br/>tolterodine ER: 5.37<br/>trospium: 5.47<br/>propiverine: 5.43<br/>solifenacin: 5.00<br/>terodiline: 4.00<br/>flavoxate: 4.00<br/>overall: 4.76</p> <p data-bbox="376 1125 909 1142">Overall switch rate: 15%</p> | Not reported | <p data-bbox="1335 252 1998 277"><b>Medication formulation</b></p> <p data-bbox="1335 280 1998 360">In comparison with the multiple-dosing drug classes at 6 months, both oxybutynin ER (57%, 95% CI 55.1–59.2) and tolterodine ER (54%, 95% CI 52.3–57.4) had lower incidences of discontinuation</p> <p data-bbox="1335 387 1998 413"><b>Medication type</b></p> <p data-bbox="1335 416 1998 544">Trospium and tolterodine were associated with the longest median time to discontinuation (5.47 months each), followed by propiverine (5.43 months) and solifenacin (5.0 months). Terodiline and flavoxate had the shortest median time to discontinuation (4 months each)</p> |

| Author (year)                     | Persistence*                                                                                                                                                                                                                                                                                                                                                                                                                                                    | Adherence*   | Determinants of persistence and adherence                                                                                                                                                                                                                                                                                                                                                                                                                                                                                                                                                                                                                                                                                                                                                                                                                                                                                                                                                                                                                                                                                                                                                                                                                                                                                                                                                                                                                            |
|-----------------------------------|-----------------------------------------------------------------------------------------------------------------------------------------------------------------------------------------------------------------------------------------------------------------------------------------------------------------------------------------------------------------------------------------------------------------------------------------------------------------|--------------|----------------------------------------------------------------------------------------------------------------------------------------------------------------------------------------------------------------------------------------------------------------------------------------------------------------------------------------------------------------------------------------------------------------------------------------------------------------------------------------------------------------------------------------------------------------------------------------------------------------------------------------------------------------------------------------------------------------------------------------------------------------------------------------------------------------------------------------------------------------------------------------------------------------------------------------------------------------------------------------------------------------------------------------------------------------------------------------------------------------------------------------------------------------------------------------------------------------------------------------------------------------------------------------------------------------------------------------------------------------------------------------------------------------------------------------------------------------------|
| Ivanova et al (2014) <sup>8</sup> | Proportion of patients discontinued at 6 months: 61.0%<br>Proportion of patients switched at 6 months: 8.0%<br>Proportion of patients persistent at 6 months: 31.0%<br>Proportion of patients discontinued at 6 months:<br>oxybutynin: 30.6%<br>tolterodine: 30.5%<br>solifenacin: 24.5%<br>darifenacin: 8.4%<br>trospium: 4.1%<br>fesoterodine: 1.9%<br>Mean time to discontinuation: 54.7 days<br>42.7% of patients never refilled their indexed prescription | Not reported | <p><b>Age</b><br/>           Patients who discontinued (50.5 years) or switched (52.6 years) medication were significantly younger than those who persisted (53.4 years; p&lt;0.001)</p> <p>Increasing age was associated with reduced odds of discontinuation (adjusted OR 0.97, 95% CI 0.96–0.97, p&lt;0.0001)</p> <p><b>Gender</b><br/>           Being male was associated with greater odds of discontinuation (adjusted OR 1.11, 95% CI 1.00–1.23, p=0.0475)</p> <p><b>Medication type</b><br/>           Patients who persisted with medication contained a significantly higher proportion of solifenacin users than those in groups who switched or discontinued (30.1% vs 19.7% vs 24.5%, respectively, p&lt;0.001) and a lower proportion of oxybutynin (22.6% vs 29.6% vs 30.6%, respectively, p&lt;0.001)</p> <p>Compared to patients treated with solifenacin, patients were significantly more likely to discontinue when treated with tolterodine (adjusted OR 1.30, 95% CI 1.16–1.45, p&lt;0.0001) or oxybutynin (adjusted OR 1.80, 95% CI 1.59–2.03, p&lt;0.0001)</p> <p><b>Presence of infection</b><br/>           Patients with UTI were more likely to discontinue compared with those without UTI (adjusted OR 1.31, 95% CI 1.19–1.45, p&lt;0.0001)</p> <p><b>Financial burden</b><br/>           Patients with lower log of baseline OAB-related costs were more likely to discontinue (adjusted OR 0.96, 95% CI 0.94–0.98, p&lt;0.0001)</p> |

| Author (year)                      | Persistence*                                                                                                                                                                                                                        | Adherence*                                                                            | Determinants of persistence and adherence                                                                                                                                                                                                                                                                                                                                                                                                                                                                                                                      |
|------------------------------------|-------------------------------------------------------------------------------------------------------------------------------------------------------------------------------------------------------------------------------------|---------------------------------------------------------------------------------------|----------------------------------------------------------------------------------------------------------------------------------------------------------------------------------------------------------------------------------------------------------------------------------------------------------------------------------------------------------------------------------------------------------------------------------------------------------------------------------------------------------------------------------------------------------------|
| Johnston et al (2012) <sup>9</sup> | Mean time of continuation at 1 year (days):<br>diabetic: 164<br>not diabetic: 146.9<br>(p<0.001 difference)<br><br>Proportion of patients discontinued at 1 year:<br>diabetic: 71.5%<br>not diabetic: 76.2%<br>(p<0.001 difference) | Mean MPR at 1 year;<br>diabetic: 0.473<br>not diabetic: 0.424<br>(p<0.001 difference) | <p><b>Age and gender</b><br/>The odds of adherence generally increase with age, and females had higher odds of adherence than men</p> <p><b>Diabetes</b><br/>The diabetes cohort had greater odds of achieving an MPR <math>\geq 0.80</math> (OR 1.215, 95% CI 1.169–1.263, p&lt;0.0001) vs non-diabetes cohort during the 12-month evaluation period</p> <p>The diabetes cohort had greater odds of filling a second OAB medication prescription (OR 1.166, 95% CI 1.127–1.205, p&lt;0.0001) vs non-diabetes cohort during the 12-month evaluation period</p> |

For peer review only

| Author (year)                     | Persistence*                                                                               | Adherence*   | Determinants of persistence and adherence                                                                                                                                                                                                                                                                                                                                                                                                                                                                                                                                                                                                                                                                                                                                                                                                                                                                                                                                                                                                                                                                                                                                                                                                                                                                                                                                                                                                                     |
|-----------------------------------|--------------------------------------------------------------------------------------------|--------------|---------------------------------------------------------------------------------------------------------------------------------------------------------------------------------------------------------------------------------------------------------------------------------------------------------------------------------------------------------------------------------------------------------------------------------------------------------------------------------------------------------------------------------------------------------------------------------------------------------------------------------------------------------------------------------------------------------------------------------------------------------------------------------------------------------------------------------------------------------------------------------------------------------------------------------------------------------------------------------------------------------------------------------------------------------------------------------------------------------------------------------------------------------------------------------------------------------------------------------------------------------------------------------------------------------------------------------------------------------------------------------------------------------------------------------------------------------------|
| Kalder et al (2014) <sup>10</sup> | Proportion of patients discontinued at:<br>1 year: 74.8%<br>2 years: 77.6%<br>3 years: 87% | Not reported | <p><b>Gender</b><br/>At 3 years, there was a significantly higher risk of discontinuation in male than female patients (HR 1.14, 95% CI 1.11–1.18, p&lt;0.001)</p> <p><b>Age</b><br/>Discontinuation was higher in younger patients than older patients:<br/>≤60 years: 89.7%<br/>61–70 years: 87.9%<br/>71–80 years: 86.8%<br/>&gt;80 years: 83.0%</p> <p><b>Prescriber's profession</b><br/>Discontinuation rate was higher in patients treated by gynecologists and general practitioners compared with urologists (HR 1.60 [95% CI 1.52–1.67] p&lt;0.001; HR 1.24 [95% CI 1.20–1.29] p&lt;0.001)</p> <p><b>Side effects</b><br/>A higher risk of discontinuation in patients experiencing side effects:<br/>headache: HR 1.27, 95% CI 1.12–1.43, p=0.002<br/>stomach upset: HR 1.20, 95% CI 1.12–1.27, p&lt;0.001<br/>glaucoma: HR 1.46, 95% CI 1.16–1.84, p&lt;0.001</p> <p><b>Medication type</b><br/>Patients using propiverine (HR 0.94, 95% CI 0.88–0.99, p=0.022) or solifenacin (HR 0.93, 95% CI 0.87–0.98, p=0.003) had a significantly lower risk of treatment discontinuation compared with oxybutynin. However, the absolute difference was relatively small</p> <p><b>Comorbidities</b><br/>Diabetes, Parkinson's disease, epilepsy, dementia, and multiple sclerosis was associated with a lowered risk of treatment discontinuation</p> <p>A prior diagnosis of migraine was associated with a higher risk of treatment discontinuation</p> |

| Author (year)                       | Persistence*                                                                                                                                                                                                                                                                     | Adherence*                                                                                                                       | Determinants of persistence and adherence                                                                                                                                                                                                                                                                                                                                                                                                                                                                                                                                                                                                                                                                                                                                                               |
|-------------------------------------|----------------------------------------------------------------------------------------------------------------------------------------------------------------------------------------------------------------------------------------------------------------------------------|----------------------------------------------------------------------------------------------------------------------------------|---------------------------------------------------------------------------------------------------------------------------------------------------------------------------------------------------------------------------------------------------------------------------------------------------------------------------------------------------------------------------------------------------------------------------------------------------------------------------------------------------------------------------------------------------------------------------------------------------------------------------------------------------------------------------------------------------------------------------------------------------------------------------------------------------------|
| Kleinman et al (2014) <sup>11</sup> | Median time until a $\geq 30$ -day medication gap: 64 days<br><br>Proportion of patients persistent:<br>beyond 1 month: 70%<br>at 9 months: 10%<br>at 1 year: 5%                                                                                                                 | Proportion of patients with PDC $\leq 10\%$ at 1 year: 45.4%<br><br>Proportion of patients with PDC $\geq 80\%$ at 1 year: 12.7% | <b>Gender</b><br>Compared to the group with PDC $\geq 80\%$ , the group with PDC $< 80\%$ contained a lower proportion of females (69.5% vs 76.3%, $p=0.006$ )<br><br><b>Age</b><br>Compared to those with PDC $\geq 80\%$ , patients with PDC $< 80\%$ were younger (mean age: 46.18 years vs 49.79 years, $p<0.001$ )<br><br><b>Race</b><br>Compared to the group with a PDC $\geq 80\%$ , the group with PDC $< 80\%$ contained a lower proportion of White patients (38.6% vs 50.0%, $p<0.001$ ) and higher proportion of Black and Hispanic patients (6.7% vs 3.7%, $p=0.025$ ; 11.6% vs 6.3%, $p=0.002$ )<br><br><b>Medication co-payment</b><br>Compared to the group with a PDC $\geq 80\%$ , those with PDC $< 80\%$ paid a higher mean medication co-payment (\$20.15 vs \$14.68, $p<0.001$ ) |
| Krhut et al (2014) <sup>12</sup>    | Median (SD) time to discontinuation: 6.53 (3.84) months<br><br>Proportion of patients persistent at:<br>3 months: 59.7%<br>6 months: 39.3%<br>9 months: 33.6%<br>1 year: 27.2%                                                                                                   | Not reported                                                                                                                     | <b>Medication type</b><br>Persistence was significantly higher in patients treated with anticholinergic medication with an ER formulation than in patients treated with IR anticholinergics (ER: 7.10 [SD 3.90] months vs IR: 6.18 [SD 3.75] months, $p=0.023$ )                                                                                                                                                                                                                                                                                                                                                                                                                                                                                                                                        |
| Manack et al (2011) <sup>13</sup>   | Mean (SD) duration of therapy: 201.9 (120.9) days<br><br>Proportion of patients that:<br>continued OAB medication $\geq 1$ year: 28.9%<br>discontinued OAB medication and did not restart <sup>d</sup> : 37.5%<br>discontinued and restarted OAB medication <sup>e</sup> : 33.5% | Not reported                                                                                                                     | Not reported                                                                                                                                                                                                                                                                                                                                                                                                                                                                                                                                                                                                                                                                                                                                                                                            |

| Author (year)                        | Persistence*                                                                                                                                                                                                                                                                                                                      | Adherence*                                                                                                                                                                                                                             | Determinants of persistence and adherence                                                                                                                                                                                                                                                                                                                                                                                                                                                                                                                                                                                                                                                                                                                                                       |
|--------------------------------------|-----------------------------------------------------------------------------------------------------------------------------------------------------------------------------------------------------------------------------------------------------------------------------------------------------------------------------------|----------------------------------------------------------------------------------------------------------------------------------------------------------------------------------------------------------------------------------------|-------------------------------------------------------------------------------------------------------------------------------------------------------------------------------------------------------------------------------------------------------------------------------------------------------------------------------------------------------------------------------------------------------------------------------------------------------------------------------------------------------------------------------------------------------------------------------------------------------------------------------------------------------------------------------------------------------------------------------------------------------------------------------------------------|
| Mauseth et al (2013) <sup>14</sup>   | <p>Proportion of patients persistent at 1 year:<br/>tolterodine: 39.0%<br/>solifenacin: 39.4%<br/>darifenacin: 34.3%<br/>fesoterodine: 29.1%<br/>overall: 38.0%</p> <p>Proportion of patients switched at 1 year:<br/>tolterodine: 12.0%<br/>overall: 10.3%</p> <p>Proportion of patients filled only one prescription: 31.9%</p> | <p>Mean MPR at 1 year: 0.62<sup>f</sup></p> <p>Proportion of patients with MPR <math>\geq 0.80^f</math> at 1 year:<br/>tolterodine: 33.7%<br/>solifenacin: 35.7%<br/>darifenacin: 37.0%<br/>fesoterodine: 38.5%<br/>overall: 35.2%</p> | <p><b>Age</b><br/>Persistence was lowest in the age group 18–39 years (20.9%), generally increased with age, and was highest in the age groups 70–79 years (43.5%) and <math>\geq 80</math> years (43.3%)</p> <p><b>Medication type</b><br/>At 1 year, persistence was highest for tolterodine (39.0%) and solifenacin (39.4%), both of which entered the market first. Persistence for darifenacin and fesoterodine, which were launched later, was 34.3% and 29.1%, respectively</p>                                                                                                                                                                                                                                                                                                          |
| Nitti et al (2016) <sup>15</sup>     | <p>Proportion of patients persistent at:<br/>1 month;<br/>mirabegron: 68.4%<br/>tolterodine ER: 47.1%</p> <p>3 months;<br/>mirabegron: 48.7%<br/>tolterodine ER: 28.6%</p> <p>6 months;<br/>mirabegron: 34.7%<br/>tolterodine ER: 18.5%</p> <p>Median persistence (days):<br/>mirabegron: 170<br/>tolterodine ER: 90</p>          | Not reported                                                                                                                                                                                                                           | <p><b>Age</b><br/>Compared with patients aged &lt;65 years, patients aged <math>\geq 65</math> years were less likely to discontinue over 6 months with tolterodine (HR 0.88, 95% CI 0.80–0.96, <math>p=0.0064</math>) and mirabegron (HR 0.68, 95% CI 0.52–0.90, <math>p=0.0068</math>)</p> <p><b>Prior treatment</b><br/>Compared to patients without prior use of OAB medication, patients with prior OAB medication use were less likely to discontinue over 6 months with tolterodine (HR 0.76, 95% CI 0.68–0.85), <math>p&lt;0.0001</math>) and mirabegron (HR 0.68, 95% CI 0.53–0.88, <math>p=0.0025</math>)</p> <p><b>Medication type</b><br/>The risk of discontinuation was lower with mirabegron compared with tolterodine (HR 0.72, 95% CI 0.61–0.85, <math>p&lt;0.0001</math>)</p> |
| Pelletier et al (2009) <sup>16</sup> | Not reported                                                                                                                                                                                                                                                                                                                      | <p>Mean cohort PDC at 1 year: 0.32</p> <p>Proportion of patients with PDC <math>\geq 0.80</math> at 1 year: 14.4%</p>                                                                                                                  | <p><b>Demographics (gender, age, comorbidities)<sup>g</sup></b><br/>Female and older subjects were more likely to adhere. Those with a history of hypertension, diabetes, or multiple sclerosis were more adherent. Subjects with COPD were less adherent</p>                                                                                                                                                                                                                                                                                                                                                                                                                                                                                                                                   |

| Author (year)                       | Persistence*                                                                                                                                                                                                                                                                                                                                                                                                                      | Adherence*                                                                                                                                                                                                                                                                                                                                     | Determinants of persistence and adherence                                                                                                                                                                                                                                                                                                                                                                                                                                                                                                                                                                                                                                                      |
|-------------------------------------|-----------------------------------------------------------------------------------------------------------------------------------------------------------------------------------------------------------------------------------------------------------------------------------------------------------------------------------------------------------------------------------------------------------------------------------|------------------------------------------------------------------------------------------------------------------------------------------------------------------------------------------------------------------------------------------------------------------------------------------------------------------------------------------------|------------------------------------------------------------------------------------------------------------------------------------------------------------------------------------------------------------------------------------------------------------------------------------------------------------------------------------------------------------------------------------------------------------------------------------------------------------------------------------------------------------------------------------------------------------------------------------------------------------------------------------------------------------------------------------------------|
| Perfetto et al (2005) <sup>17</sup> | <p>Cumulative discontinuation rates at:</p> <p>1 month;<br/>tolterodine ER: 6%<br/>oxybutynin ER: 11%</p> <p>3 months;<br/>tolterodine ER: 55%<br/>oxybutynin ER: 62%</p> <p>6 months;<br/>tolterodine ER: 69%<br/>oxybutynin ER: 76%</p> <p>11 months;<br/>tolterodine ER: 79%<br/>oxybutynin ER: 85%</p> <p>Overall, at 11 months, 21% of patients remained on tolterodine ER and 15% of patients remained on oxybutynin ER</p> | Not reported                                                                                                                                                                                                                                                                                                                                   | Not reported                                                                                                                                                                                                                                                                                                                                                                                                                                                                                                                                                                                                                                                                                   |
| Sears et al (2010) <sup>18</sup>    | <p>Proportion of patients without prescription refills over 3 years: 35.1%</p> <p>Median persistence (days):<br/>overall: 273<br/>patients with at least 1 refill: 582</p> <p>Overall medication persistence duration was 273 days when all cases were analyzed and 582 days when those with at least 1 refill were analyzed</p>                                                                                                  | <p>Median MPR at 3 years:<br/>oxybutynin 5 mg IR: 0.68<br/>oxybutynin 5 mg ER: 0.83<br/>oxybutynin 10 mg ER: 0.84<br/>tolterodine 1 mg IR: 0.71<br/>tolterodine 2 mg IR: 0.73<br/>tolterodine 2 mg ER: 0.88<br/>tolterodine 4 mg ER: 0.89<br/>overall: 0.82</p> <p>Proportion of patients with MPR <math>\geq</math>0.80 at 3 years: 34.0%</p> | <p><b>Gender</b><br/>Male patients had a higher median MPR than female patients (0.86 vs 0.81, <math>p &lt; 0.001</math>)</p> <p>Medication adherence was higher in males than in females (0.370 vs 0.328, <math>p &lt; 0.001</math>)</p> <p>Of patients refilling their prescription at least once, the median number of days persisted was longer in females than in males (606.0 days vs 547.0 days, <math>p = 0.01</math>)</p> <p><b>Medication type</b><br/>Of patients refilling their prescription at least once, median medication persistence was longest in 5 mg oxybutynin IR (634 days, 95% CI 596.1–671.9) and lowest with 10 mg oxybutynin ER (504 days, 95% CI 137.0–871.0)</p> |

| Author (year)                              | Persistence*                                                                                                                                                                                                                                                                                                                                                          | Adherence*                                                                                                          | Determinants of persistence and adherence                                                                                                                                                                                                                                          |
|--------------------------------------------|-----------------------------------------------------------------------------------------------------------------------------------------------------------------------------------------------------------------------------------------------------------------------------------------------------------------------------------------------------------------------|---------------------------------------------------------------------------------------------------------------------|------------------------------------------------------------------------------------------------------------------------------------------------------------------------------------------------------------------------------------------------------------------------------------|
| Sicras-Mainar et al (2016) <sup>19</sup>   | <p>Proportion of patients persistent (without switching or experiencing a gap of &gt;60 days) at:</p> <p>6 months;<br/>fesoterodine: 71.4%<br/>solifenacin: 67.1%<br/>tolterodine: 64.8%</p> <p>1 year;<br/>fesoterodine: 40.2%<br/>solifenacin: 34.7%<br/>tolterodine: 33.6%</p>                                                                                     | <p>Mean MPR at 1 year was: 0.880, 0.877 or 0.875, depending upon geographical location</p>                          | <p><b>Medication type</b></p> <p>Persistence at 6 months and 1 year was statistically significantly higher with fesoterodine than solifenacin and tolterodine (p&lt;0.05).</p> <p>Persistence at 1 year was significantly lower with solifenacin than fesoterodine (p&lt;0.01)</p> |
| Sicras-Mainar et al (2015) <sup>1,20</sup> | <p>Proportion of patients persistent at:</p> <p>3 months: 86.2%<br/>6 months: 67.6%<br/>9 months: 48.4%<br/>1 year: 35.9%</p> <p>Mean (SD) treatment duration (without stopping, switching or a gap &gt;30 days):<br/>fesoterodine: 8.1<br/>solifenacin: 7.8<br/>tolterodine: 7.7<br/>overall: 7.9</p>                                                                | <p>Mean MPR at 1 year:<br/>fesoterodine: 0.900<br/>solifenacin: 0.870<br/>tolterodine: 0.861<br/>overall: 0.877</p> | <p>Not reported</p>                                                                                                                                                                                                                                                                |
| Sicras-Mainar et al (2014) <sup>21</sup>   | <p>Proportion of patients persistent (without switching or experiencing a gap of &gt;30 days):</p> <p>3 months;<br/>fesoterodine: 94.8%<br/>solifenacin: 76.2%<br/>tolterodine: 70.8%</p> <p>6 months;<br/>fesoterodine: 70.7%<br/>solifenacin: 59.5%<br/>tolterodine: 57.1%</p> <p>1 year;<br/>fesoterodine: 46.6%<br/>solifenacin: 36.5%<br/>tolterodine: 33.5%</p> | <p>Mean MPR at 1 year:<br/>fesoterodine: 0.907<br/>solifenacin: 0.935<br/>tolterodine: 0.936</p>                    | <p><b>Medication type</b></p> <p>At 3 months, persistence was higher with fesoterodine than with tolterodine and solifenacin</p>                                                                                                                                                   |



| Author (year)                              | Persistence*                                                                                                                                                                                                                                                                                                                                                                                                                                                            | Adherence*                                                                                                                                                                                                                                                                                                                                                                                                  | Determinants of persistence and adherence                                                                                                                                                                                                                                                                                                                                                                                    |
|--------------------------------------------|-------------------------------------------------------------------------------------------------------------------------------------------------------------------------------------------------------------------------------------------------------------------------------------------------------------------------------------------------------------------------------------------------------------------------------------------------------------------------|-------------------------------------------------------------------------------------------------------------------------------------------------------------------------------------------------------------------------------------------------------------------------------------------------------------------------------------------------------------------------------------------------------------|------------------------------------------------------------------------------------------------------------------------------------------------------------------------------------------------------------------------------------------------------------------------------------------------------------------------------------------------------------------------------------------------------------------------------|
| Sicras-Mainar et al (2014) <sup>9,22</sup> | Proportion of patients persistent at 1 year:<br>fesoterodine: 35.8%<br>solifenacin: 31.9%<br>tolterodine: 30.9%                                                                                                                                                                                                                                                                                                                                                         | Mean MPR at 1 year:<br>fesoterodine: 0.937<br>solifenacin: 0.948<br>tolterodine: 0.935                                                                                                                                                                                                                                                                                                                      | <b>Medication type</b><br>The mean duration of treatment was numerically higher with fesoterodine compared to solifenacin and tolterodine, but no statistical between-medication differences were found. However, adjusted HRs for remaining on treatment at 1 year significantly favored fesoterodine compared with solifenacin (HR 1.24 [95% CI 1.05–1.47]; p=0.011) and tolterodine (HR 1.28 [95% CI 1.07–1.52]; p=0.006) |
| Sicras-Mainar et al (2013) <sup>9,23</sup> |                                                                                                                                                                                                                                                                                                                                                                                                                                                                         | Mean MPR at 1 year:<br>fesoterodine: 0.945<br>solifenacin: 0.954<br>tolterodine: 0.946                                                                                                                                                                                                                                                                                                                      | <b>Medication type</b><br>The mean duration of treatment was numerically higher with fesoterodine compared to solifenacin and tolterodine, but no statistical between-medication differences were found                                                                                                                                                                                                                      |
| Suehs et al (2016) <sup>24</sup>           | Proportion of patients not refilling their index medication:<br>PIM: 41.4%<br>Non-PIM: 47.8%<br>(p<0.01)<br><br>Mean number of days persistent (before discontinuation or experiencing a gap >15 days):<br>PIM: 87.6<br>Non-PIM: 80.9<br>(p<0.001)<br><br>Proportion of patients persistent at:<br>3 months;<br>PIM: 23.9%<br>Non-PIM: 20.3%<br><br>6 months;<br>PIM: 13.2%<br>Non-PIM: 11.4%<br><br>1 year;<br>PIM: 5.1%<br>Non-PIM: 4.5%<br>(all p<0.001 differences) | Mean PDC at:<br>3 months;<br>PIM: 0.62<br>Non-PIM: 0.59<br><br>6 months;<br>PIM: 0.45<br>Non-PIM: 0.42<br><br>1 year;<br>PIM: 0.32<br>Non-PIM: 0.30<br>(all p<0.001 differences)<br><br>Proportion of patients with<br>PDC ≥0.80:<br>3 months;<br>PIM: 37.0%<br>Non-PIM: 35.0%<br><br>6 months;<br>PIM: 23.3%<br>Non-PIM: 19.7%<br><br>1 year;<br>PIM: 12.7%<br>Non-PIM: 10.7%<br>(all p<0.001 differences) | <b>Medication use appropriateness</b><br>At 1 year, there was no statistical difference between PIM status and OAB treatment discontinuation in the multivariable adjusted model based on the primary analysis definition (15-day definition OR 0.977, 95% CI 0.891–1.072, p=0.63; 30-day definition OR 0.939, 95% CI 0.871–1.013, p=0.10)                                                                                   |

| Author (year)                      | Persistence*                                                                                                                                                                                            | Adherence*                                                                                                                                                    | Determinants of persistence and adherence                                                                                                    |
|------------------------------------|---------------------------------------------------------------------------------------------------------------------------------------------------------------------------------------------------------|---------------------------------------------------------------------------------------------------------------------------------------------------------------|----------------------------------------------------------------------------------------------------------------------------------------------|
| Sussman et al (2017) <sup>25</sup> | Proportion of patients discontinued at 1 year (gap of ≥30 days):<br>mirabegron: 67.1%<br>anticholinergic: 84.1%<br><br>Median time to discontinuation (days):<br>mirabegron: 131<br>anticholinergic: 30 | Mean PDC:<br>mirabegron: 0.66<br>anticholinergic: 0.55<br><br>Proportion of patients with PDC ≥0.80 at 1 year:<br>mirabegron: 43.6%<br>anticholinergic: 30.9% | <b>Medication type</b><br>Users of mirabegron appeared to achieve greater persistence and adherence at 1 year than users of anticholinergics |

For peer review only

| Author (year)                   | Persistence*                                                                                                                                                                                                                                                                                                                                                                                                                                                                                                                                                                                                                                                                                                                                                                                                                                                                                                                                                                                                                                                                                                                                                                                                                                                                                                                                                                                                                                                                                                                        | Adherence*   | Determinants of persistence and adherence                                                                                                                                                                                                                                                                                  |
|---------------------------------|-------------------------------------------------------------------------------------------------------------------------------------------------------------------------------------------------------------------------------------------------------------------------------------------------------------------------------------------------------------------------------------------------------------------------------------------------------------------------------------------------------------------------------------------------------------------------------------------------------------------------------------------------------------------------------------------------------------------------------------------------------------------------------------------------------------------------------------------------------------------------------------------------------------------------------------------------------------------------------------------------------------------------------------------------------------------------------------------------------------------------------------------------------------------------------------------------------------------------------------------------------------------------------------------------------------------------------------------------------------------------------------------------------------------------------------------------------------------------------------------------------------------------------------|--------------|----------------------------------------------------------------------------------------------------------------------------------------------------------------------------------------------------------------------------------------------------------------------------------------------------------------------------|
| Wagg et al (2012) <sup>26</sup> | <p>Time (days) to discontinuation (or a gap &gt;1.5 times the length of the previous prescription without a refill):</p> <p>darifenacin: 135.9<br/>           flavoxate: 77.4<br/>           oxybutynin ER: 146.7<br/>           oxybutynin IR: 119.3<br/>           propiverine: 141.1<br/>           solifenacin: 158.7 (5 mg); 216.0 (10 mg)<br/>           tolterodine ER: 156.7<br/>           tolterodine IR: 151.7<br/>           trospium: 138.5</p> <p>Proportion of patients persistent at 3 months:</p> <p>darifenacin: 52%<br/>           flavoxate: 28%<br/>           oxybutynin ER: 44%<br/>           oxybutynin IR: 40%<br/>           propiverine: 47%<br/>           solifenacin: 58%<br/>           tolterodine ER: 47%<br/>           tolterodine IR: 46%<br/>           trospium: 42%</p> <p>Proportion of patients persistent at 6 months:</p> <p>darifenacin: 30%<br/>           flavoxate: 16%<br/>           oxybutynin ER: 35%<br/>           oxybutynin IR: 29%<br/>           propiverine: 36%<br/>           solifenacin: 46%<br/>           tolterodine ER: 36%<br/>           tolterodine IR: 33%<br/>           trospium: 33%</p> <p>Proportion of patients persistent at 1 year:</p> <p>darifenacin: 17.4%<br/>           flavoxate: 13.5%<br/>           oxybutynin ER: 26.1%<br/>           oxybutynin IR: 21.7%<br/>           propiverine: 26.8%<br/>           solifenacin: 35%<br/>           tolterodine ER: 28.2%<br/>           tolterodine IR: 24.1%<br/>           trospium: 25.9%</p> | Not reported | <p><b>Age</b><br/>           Over 1 year, the majority of patients aged ≥60 years were more likely to persist than younger patients. Graphical results only</p> <p><b>Medication type</b><br/>           Patients receiving solifenacin spent the longest mean duration on therapy compared with other OAB medications</p> |

| Author (year)                   | Persistence*                                                                                                                                                                                                                                                                                                                                                                                                                                                                                                                                                                                                                                                              | Adherence*                                                                                                                                                                       | Determinants of persistence and adherence                                                                                                                                                                                                                                                                                                                                                                                                                                                                                                                                                                                                                                                                         |
|---------------------------------|---------------------------------------------------------------------------------------------------------------------------------------------------------------------------------------------------------------------------------------------------------------------------------------------------------------------------------------------------------------------------------------------------------------------------------------------------------------------------------------------------------------------------------------------------------------------------------------------------------------------------------------------------------------------------|----------------------------------------------------------------------------------------------------------------------------------------------------------------------------------|-------------------------------------------------------------------------------------------------------------------------------------------------------------------------------------------------------------------------------------------------------------------------------------------------------------------------------------------------------------------------------------------------------------------------------------------------------------------------------------------------------------------------------------------------------------------------------------------------------------------------------------------------------------------------------------------------------------------|
| Wagg et al (2015) <sup>27</sup> | <p>Proportion of patients persistent at 1 year (without switching or experiencing a gap <math>\geq</math>30 days):</p> <p>mirabegron: 31.7%<br/>fesoterodine: 21.0%<br/>oxybutynin ER: 18.9%<br/>oxybutynin IR: 13.8%<br/>solifenacin: 22.0%<br/>tolterodine ER: 19.7%</p> <p>Median duration of treatment (days):</p> <p>mirabegron: 221<br/>solifenacin: 108<br/>fesoterodine: 100<br/>tolterodine ER: 100<br/>oxybutynin ER: 100<br/>oxybutynin IR: 75</p> <p>Proportion of patients persistent at 1 year:</p> <p>treatment-naïve: 19.0%<br/>treatment-experienced: 30.0%</p> <p>Median days on therapy:</p> <p>treatment-naïve: 90<br/>treatment-experienced: 205</p> | <p>Median MPR at 1 year:</p> <p>mirabegron: 0.645<br/>fesoterodine: 0.492<br/>oxybutynin ER: 0.328<br/>oxybutynin IR: 0.186<br/>solifenacin: 0.459<br/>tolterodine ER: 0.454</p> | <p><b>Age</b><br/>As age increased, median MPR increased for OAB medications:<br/>&lt;46 years: 0.273<br/>45–64 years: 0.372<br/><math>\geq</math>65 years: 0.492<br/>(<math>p &lt; 0.001</math> difference compared to <math>\geq</math>65 years)</p> <p><b>Treatment status</b><br/>Patients with prior experience of OAB medication use achieved a higher MPR than treatment-naïve patients (0.546 vs 0.328, <math>p &lt; 0.001</math>)</p> <p><b>Medication type</b><br/>Compared with antimuscarinics, patients taking mirabegron demonstrated greater persistence and statistically significantly greater adherence (64.5% vs 18.6%–49.2%, <math>p &lt; 0.001</math>) than those taking antimuscarinics</p> |

| Author (year)                   | Persistence*                                                                                                                                                                                                                                                                                                                                                                                                                                                                                                                               | Adherence*                                                                                                                                               | Determinants of persistence and adherence                                                                                                                                                                                                                                                                                                                                                                                                                                                                                                                                                                                                                                                                                                                                                                                                                                                                                                                                               |
|---------------------------------|--------------------------------------------------------------------------------------------------------------------------------------------------------------------------------------------------------------------------------------------------------------------------------------------------------------------------------------------------------------------------------------------------------------------------------------------------------------------------------------------------------------------------------------------|----------------------------------------------------------------------------------------------------------------------------------------------------------|-----------------------------------------------------------------------------------------------------------------------------------------------------------------------------------------------------------------------------------------------------------------------------------------------------------------------------------------------------------------------------------------------------------------------------------------------------------------------------------------------------------------------------------------------------------------------------------------------------------------------------------------------------------------------------------------------------------------------------------------------------------------------------------------------------------------------------------------------------------------------------------------------------------------------------------------------------------------------------------------|
| Wagg et al (2015) <sup>28</sup> | <p>Proportion of patients persistent at 6 months: &lt;40%</p> <p>Proportion of patients discontinued at 4 years:</p> <p>oxybutynin: 93%</p> <p>tolterodine IR: 90%</p> <p>tolterodine ER: 90%</p> <p>solifenacin: 90%</p> <p>darifenacin: 91%</p> <p>tropium: 94%</p> <p>flavoxate: 98%</p> <p>overall: 91.4%</p> <p>Median duration of first-line treatment (days):</p> <p>oxybutynin: 60</p> <p>tolterodine IR: 90</p> <p>tolterodine ER: 100</p> <p>solifenacin: 106</p> <p>darifenacin: 91</p> <p>tropium: 90</p> <p>flavoxate: 10</p> | Not reported                                                                                                                                             | <p><b>Medication type</b></p> <p>Initial treatment with solifenacin, darifenacin, tolterodine ER and tolterodine was associated with a significantly lower risk of discontinuation compared with oxybutynin as the first medication (HRs 0.68, 0.72, 0.77 and 0.84, respectively; p&lt;0.001 vs oxybutynin for each)</p> <p>Patients receiving flavoxate as initial treatment had a significantly higher risk of discontinuation compared with those who received oxybutynin (HR 2.48, p&lt;0.0001)</p> <p>There was no statistically significant difference in the risk of discontinuation with tropium as first-line compared with oxybutynin (p=0.1074)</p> <p><b>Age</b></p> <p>Compared with patients aged 40–64 years, patients aged &lt;20, 20–39, 65–74 and ≥75 years had a higher risk of discontinuation (HRs 1.08–1.19, all p≤0.0022)</p> <p><b>Gender</b></p> <p>Males had a slightly higher risk of discontinuation than females (HR 1.03, 95% CI 1.00–1.06, p=0.0341)</p> |
| Yeaw et al (2009) <sup>29</sup> | <p>Proportion of patients remaining on therapy (without a refill gap &gt;60 days) at:</p> <p>6 months: 28%</p> <p>1 year: 18%</p>                                                                                                                                                                                                                                                                                                                                                                                                          | Proportion of patients with mean MPR at 1 year: 35%                                                                                                      | Not reported                                                                                                                                                                                                                                                                                                                                                                                                                                                                                                                                                                                                                                                                                                                                                                                                                                                                                                                                                                            |
| Yu et al (2005) <sup>30</sup>   | <p>Proportion of patients without index prescription refill within the first 6 months: 36.9%</p> <p>Proportion of patients discontinued at:</p> <p>1 month: 42.7%</p> <p>2 months: 66.8%</p> <p>5 months days: 77.6%</p> <p>9 months: 86.3%</p> <p>At a 1-year follow-up, the rate of discontinuation was increased to 88.6%</p>                                                                                                                                                                                                           | <p>Mean MPR at:</p> <p>6 months: 0.34</p> <p>1 year: 0.22</p> <p>Proportion of patients with MPR ≥0.80 at:</p> <p>6 months: 4.9%</p> <p>1 year: 0.7%</p> | <p><b>Medication type</b></p> <p>Compared with oxybutynin, patients receiving tolterodine were less likely to have discontinued at 6 months (HR 0.74, 95% CI 0.67–0.81, p&lt;0.01)</p> <p><b>Polypharmacy</b></p> <p>The use of multiple drugs was associated with a higher risk of discontinuation by the 6-month follow up (HR 1.26, 95% CI 1.09–1.46, p&lt;0.01)</p> <p>Other significant predictors of higher persistence included: White ethnicity, previous hospitalization length, and starting treatment with tolterodine</p>                                                                                                                                                                                                                                                                                                                                                                                                                                                   |

1  
2  
3 CI = confidence interval; COPD = chronic obstructive pulmonary disease; ER = extended release; HR = hazard ratio; IR = immediate release; MPR = medication possession ratio;  
4 OAB = overactive bladder; OR = odds ratio; PIM = potentially inappropriate medication; PDC = proportion of days covered; RR = risk ratio; SD = standard deviation; UTIs = urinary tract  
5 infections

6 \*In cases where reported values differ from published values, they were derived from the published data; <sup>a</sup>cohort discontinuation percentages are also quoted for 3, 6, 12 and 18 months.  
7 However, these figures included some non-oral OAB medications. Therefore, these have not been included; <sup>b</sup>within 1.5x the duration of the initial prescription; <sup>c</sup>over a 4-year period;  
8 <sup>d</sup>stopped receiving an OAB medication for  $\geq 6$  months between end of therapy and end of the study's eligibility period; <sup>e</sup>stopped receiving an OAB medication for <6 months before  
9 restarting an OAB medication; <sup>f</sup>patients who filled only one prescription were given an MPR of zero; <sup>g</sup>no exact figures were quoted within the article text

10  
11  
12  
13  
14  
15  
16  
17  
18  
19  
20  
21  
22  
23  
24  
25  
26  
27  
28  
29  
30  
31  
32  
33  
34  
35  
36  
37  
38  
39  
40  
41  
42  
43  
44  
45  
46

For peer review only

## References

1. Brostrom S, Hallas J: Persistence of antimuscarinic drug use. *Eur J Clin Pharmacol* 2009; **65**: 309.
2. Chancellor MB, Migliaccio-Walle K, Bramley TJ et al: Long-term patterns of use and treatment failure with anticholinergic agents for overactive bladder. *Clin Ther* 2013; **35**: 1744.
3. Chapple CR, Nazir J, Hakimi Z et al: Persistence and adherence with mirabegron versus antimuscarinic agents in patients with overactive bladder: a retrospective observational study in UK clinical practice. *Eur Urol* 2017; **72**: 389.
4. Desgagne A, LeLorier J: Incontinence drug utilization patterns in Quebec, Canada. *Value Health* 1999; **2**: 452.
5. D'Souza AO, Smith MJ, Miller LA et al: Persistence, adherence, and switch rates among extended-release and immediate-release overactive bladder medications in a regional managed care plan. *J Manag Care Pharm* 2008; **14**: 291.
6. Gomes T, Juurlink DN, Mamdani MM: Comparative adherence to oxybutynin or tolterodine among older patients. *Eur J Clin Pharmacol* 2012; **68**: 97.
7. Gopal M, Haynes K, Bellamy SL et al: Discontinuation rates of anticholinergic medications used for the treatment of lower urinary tract symptoms. *Obstet Gynecol* 2008; **112**: 1311.
8. Ivanova JI, Hayes-Larson E, Sorg RA et al: Healthcare resource use and costs of privately insured patients who switch, discontinue, or persist on anti-muscarinic therapy for overactive bladder. *J Med Econ* 2014; **17**: 741.
9. Johnston S, Janning SW, Haas GP et al: Comparative persistence and adherence to overactive bladder medications in patients with and without diabetes. *Int J Clin Pract* 2012; **66**: 1042.
10. Kalder M, Pantazis K, Dinas K et al: Discontinuation of treatment using anticholinergic medications in patients with urinary incontinence. *Obstet Gynecol* 2014; **124**: 794.
11. Kleinman NL, Odell K, Chen CI et al: Persistence and adherence with urinary antispasmodic medications among employees and the impact of adherence on costs and absenteeism. *J Manag Care Spec Pharm* 2014; **20**: 1047.
12. Krhut J, Gartner M, Petzel M et al: Persistence with first line anticholinergic medication in treatment-naive overactive bladder patients. *Scand J Urol* 2014; **48**: 79.
13. Manack A, Motsko SP, Haag-Molkenteller C et al: Epidemiology and healthcare utilization of neurogenic bladder patients in a US claims database. *Neurourol Urodyn* 2011; **30**: 395.
14. Mauseth SA, Skurtveit S, Spigset O: Adherence, persistence and switch rates for anticholinergic drugs used for overactive bladder in women: data from the Norwegian Prescription Database. *Acta Obstet Gynecol Scand* 2013; **92**: 1208.
15. Nitti VM, Rovner ES, Franks B et al: Persistence with mirabegron versus tolterodine in patients with overactive bladder. *Am J Pharm Benefits* 2016; **8**: e25.
16. Pelletier EM, Vats V, Clemens JQ: Pharmacotherapy adherence and costs versus nonpharmacologic management in overactive bladder. *Am J Manag Care* 2009; **15**: S108.
17. Peretto EM, Subedi P, Jumadilova Z: Treatment of overactive bladder: a model comparing extended-release formulations of tolterodine and oxybutynin. *Am J Manag Care* 2005; **11**: S150.
18. Sears CL, Lewis C, Noel K et al: Overactive bladder medication adherence when medication is free to patients. *J Urol* 2010; **183**: 1077.
19. Sicras-Mainar A, Navarro-Artieda R, Ruiz-Torrejon A et al: Persistence and concomitant medication in patients with overactive bladder treated with antimuscarinic agents in primary care. An observational baseline study. *Actas Urol Esp* 2016; **40**: 96.

- 1  
2  
3 20. Sicras-Mainar A, Navarro-Artieda R, Ruiz-Torrejon A et al: Impact of loss of work productivity in patients  
4 with overactive bladder treated with antimuscarinics in Spain: study in routine clinical practice  
5 conditions. *Clin Drug Investig* 2015; **35**: 795.  
6  
7 21. Sicras-Mainar A, Rejas-Gutierrez J, Navarro-Artieda R et al: Use of health care resources and  
8 associated costs in non-institutionalized vulnerable elders with overactive bladder treated with  
9 antimuscarinic agents in the usual medical practice. *Actas Urol Esp* 2014; **38**: 530.  
10  
11 22. Sicras-Mainar A, Rejas J, Navarro-Artieda R et al: Antimuscarinic persistence patterns in newly treated  
12 patients with overactive bladder: a retrospective comparative analysis. *Int Urogynecol J* 2014; **25**: 485.  
13  
14 23. Sicras-Mainar A, Rejas J, Navarro-Artieda R et al: Health economics perspective of fesoterodine,  
15 tolterodine or solifenacin as first-time therapy for overactive bladder syndrome in the primary care  
16 setting in Spain. *BMC Urol* 2013; **13**: 51.  
17  
18 24. Suehs BT, Davis C, Franks B et al: Effect of potentially inappropriate use of antimuscarinic medications  
19 on healthcare use and cost in individuals with overactive bladder. *J Am Geriatr Soc* 2016; **64**: 779.  
20  
21 25. Sussman D, Yehoshua A, Kowalski J et al: Adherence and persistence of mirabegron and  
22 anticholinergic therapies in patients with overactive bladder: a real-world claims data analysis. *Int J Clin  
23 Pract* 2017; **71**: e12824.  
24  
25 26. Wagg A, Compion G, Fahey A et al: Persistence with prescribed antimuscarinic therapy for overactive  
26 bladder: a UK experience. *BJU Int* 2012; **110**: 1767.  
27  
28 27. Wagg A, Franks B, Ramos B et al: Persistence and adherence with the new beta-3 receptor agonist,  
29 mirabegron, versus antimuscarinics in overactive bladder: early experience in Canada. *Can Urol Assoc  
30 J* 2015; **9**: 343.  
31  
32 28. Wagg A, Diles D, Berner T: Treatment patterns for patients on overactive bladder therapy: a  
33 retrospective statistical analysis using Canadian claims data. *JHEOR* 2015; **3**: 43.  
34  
35 29. Yeaw J, Benner JS, Walt JG et al: Comparing adherence and persistence across 6 chronic medication  
36 classes. *J Manag Care Pharm* 2009; **15**: 728.  
37  
38 30. Yu YF, Nichol MB, Yu AP et al: Persistence and adherence of medications for chronic overactive  
39 bladder/urinary incontinence in the California Medicaid program. *Value Health* 2005; **8**: 495.  
40  
41  
42  
43  
44  
45  
46  
47  
48  
49  
50  
51  
52  
53  
54  
55  
56  
57  
58  
59  
60



## Supplemental Information

### Literature Search Strategies

#### The following databases were searched;

- Allied and Complementary Database [AMED] (via OVID)
- Cumulative Index to Nursing and Allied Health Literature [CINAHL] (via EBSCOhost)
- MEDLINE (via EBSCOhost)
- Database of Reviews of Effects [DARE] (via CRD, University of York)
- Health Technology Assessment [HTA] (via CRD, University of York)
- Centre for Reviews and Dissemination [CRD] (via CRD, University of York)

The searches were conducted on the 24<sup>th</sup> April 2017

#### The date span of the searches;

- AMED – 1985 to April 2017
- CINAHL – 1937 to April 2017
- MEDLINE – 1946 to April 2017
- DARE / HTA / CRD – 1994 to April 2017

|   | <b>Searches (AMED)*</b>                                                                                                                                                                                            |    |
|---|--------------------------------------------------------------------------------------------------------------------------------------------------------------------------------------------------------------------|----|
| 1 | persisten* OR adheren* OR complian* OR discont* OR tolera* OR utili* OR database [In Article Title]                                                                                                                | –  |
| 2 | Bladder" OR "Overactive Bladder" OR "OAB" OR urin* OR incontinen* [In Article Title]                                                                                                                               | –  |
| 3 | Oxybutynin OR Tolterodine OR Fesoterodine OR Trospium OR Darifenacin OR Solifenacin OR Propiverine OR Imidafenacin OR Mirabegron OR Flavoxate OR Hyoscyamin* OR Anticholinerg* OR Antimuscarin* [In Article Title] | –  |
| 4 | (#1 AND #2 OR #3)                                                                                                                                                                                                  | 18 |
|   | <b>Searches (CINAHL &amp; MEDLINE)*</b>                                                                                                                                                                            |    |
| 5 | persisten* OR adheren* OR complian* OR discont* OR tolera* OR utili* OR database [In Article Title]                                                                                                                | –  |
| 6 | Bladder" OR "Overactive Bladder" OR "OAB" OR urin* OR incontinen* [In Article Title]                                                                                                                               | –  |
| 7 | Oxybutynin OR Tolterodine OR Fesoterodine OR Trospium OR Darifenacin OR Solifenacin OR Propiverine OR Imidafenacin OR Mirabegron OR Flavoxate OR Hyoscyamin* OR Anticholinerg* OR Antimuscarin* [In Article Title] | –  |

|    |                                                                                                                                                                                                                    |              |
|----|--------------------------------------------------------------------------------------------------------------------------------------------------------------------------------------------------------------------|--------------|
| 8  | (#5 AND #6 OR #7)                                                                                                                                                                                                  | 3,855        |
|    | <b>Searches (DARE / HTA / CRD)*</b>                                                                                                                                                                                |              |
| 9  | persisten* OR adheren* OR complian* OR discont* OR tolera* OR utili* OR database [In Article Title]                                                                                                                | –            |
| 10 | Bladder" OR "Overactive Bladder" OR "OAB" OR urin* OR incontinen* [In Article Title]                                                                                                                               | –            |
| 11 | Oxybutynin OR Tolterodine OR Fesoterodine OR Trospium OR Darifenacin OR Solifenacin OR Propiverine OR Imidafenacin OR Mirabegron OR Flavoxate OR Hyoscyamin* OR Anticholinerg* OR Antimuscarin* [In Article Title] | –            |
| 12 | (#9 AND #10 OR #11)                                                                                                                                                                                                | 24           |
| 13 | Total from #4, #8 and #12                                                                                                                                                                                          | 3,897        |
| 14 | Remove duplicates from 13 using EndNoteWeb                                                                                                                                                                         | <b>3,614</b> |

\* Boolean operators were used. No other limits or filters were applied to each database.

## MOOSE Checklist for Meta-analyses of Observational Studies

| Item No                                     | Recommendation                                                                                                                                                                                                                                                               | Reported on Page No                       |
|---------------------------------------------|------------------------------------------------------------------------------------------------------------------------------------------------------------------------------------------------------------------------------------------------------------------------------|-------------------------------------------|
| Reporting of background should include      |                                                                                                                                                                                                                                                                              |                                           |
| 1                                           | Problem definition                                                                                                                                                                                                                                                           | 3–5                                       |
| 2                                           | Hypothesis statement                                                                                                                                                                                                                                                         | N/A                                       |
| 3                                           | Description of study outcome(s)                                                                                                                                                                                                                                              | 7                                         |
| 4                                           | Type of exposure or intervention used                                                                                                                                                                                                                                        | 6–8                                       |
| 5                                           | Type of study designs used                                                                                                                                                                                                                                                   | 6                                         |
| 6                                           | Study population                                                                                                                                                                                                                                                             | 6–7                                       |
| Reporting of search strategy should include |                                                                                                                                                                                                                                                                              |                                           |
| 7                                           | Qualifications of searchers (eg, librarians and investigators)                                                                                                                                                                                                               | 7                                         |
| 8                                           | Search strategy, including time period included in the synthesis and key words                                                                                                                                                                                               | 6-7, Figure 1, Supplemental Information   |
| 9                                           | Effort to include all available studies, including contact with authors                                                                                                                                                                                                      | 7                                         |
| 10                                          | Databases and registries searched                                                                                                                                                                                                                                            | 5–6, Supplemental Information             |
| 11                                          | Search software used, name and version, including special features used (eg, explosion)                                                                                                                                                                                      | Supplemental Information                  |
| 12                                          | Use of hand searching (eg, reference lists of obtained articles)                                                                                                                                                                                                             | 6–7                                       |
| 13                                          | List of citations located and those excluded, including justification                                                                                                                                                                                                        | 6–7, Supplemental Tables 1 and 2          |
| 14                                          | Method of addressing articles published in languages other than English                                                                                                                                                                                                      | 6                                         |
| 15                                          | Method of handling abstracts and unpublished studies                                                                                                                                                                                                                         | 6–7                                       |
| 16                                          | Description of any contact with authors                                                                                                                                                                                                                                      | N/A                                       |
| Reporting of methods should include         |                                                                                                                                                                                                                                                                              |                                           |
| 17                                          | Description of relevance or appropriateness of studies assembled for assessing the hypothesis to be tested                                                                                                                                                                   | 6–7                                       |
| 18                                          | Rationale for the selection and coding of data (eg, sound clinical principles or convenience)                                                                                                                                                                                | 6–7                                       |
| 19                                          | Documentation of how data were classified and coded (eg, multiple raters, blinding and interrater reliability)                                                                                                                                                               | 6–7                                       |
| 20                                          | Assessment of confounding (eg, comparability of cases and controls in studies where appropriate)                                                                                                                                                                             | N/A                                       |
| 21                                          | Assessment of study quality, including blinding of quality assessors, stratification or regression on possible predictors of study results                                                                                                                                   | Not performed – see response to reviewers |
| 22                                          | Assessment of heterogeneity                                                                                                                                                                                                                                                  | 7                                         |
| 23                                          | Description of statistical methods (eg, complete description of fixed or random effects models, justification of whether the chosen models account for predictors of study results, dose-response models, or cumulative meta-analysis) in sufficient detail to be replicated | 7                                         |
| 24                                          | Provision of appropriate tables and graphics                                                                                                                                                                                                                                 | Figures 1 and 2 and Supplemental Tables   |

| Reporting of results should include |                                                                     |                                          |
|-------------------------------------|---------------------------------------------------------------------|------------------------------------------|
| 25                                  | Graphic summarizing individual study estimates and overall estimate | Figure 2 and Supplemental Tables 1 and 2 |
| 26                                  | Table giving descriptive information for each study included        | Supplemental Tables 1 and 2              |
| 27                                  | Results of sensitivity testing (eg, subgroup analysis)              | N/A                                      |
| 28                                  | Indication of statistical uncertainty of findings                   | N/A                                      |

| Item No                                 | Recommendation                                                                                                            | Reported on Page No                       |
|-----------------------------------------|---------------------------------------------------------------------------------------------------------------------------|-------------------------------------------|
| Reporting of discussion should include  |                                                                                                                           |                                           |
| 29                                      | Quantitative assessment of bias (eg, publication bias)                                                                    | N/A                                       |
| 30                                      | Justification for exclusion (eg, exclusion of non-English language citations)                                             | Figure 1 legend                           |
| 31                                      | Assessment of quality of included studies                                                                                 | Not performed – see response to reviewers |
| Reporting of conclusions should include |                                                                                                                           |                                           |
| 32                                      | Consideration of alternative explanations for observed results                                                            | 12–14                                     |
| 33                                      | Generalization of the conclusions (ie, appropriate for the data presented and within the domain of the literature review) | 13-15                                     |
| 34                                      | Guidelines for future research                                                                                            | 15                                        |
| 35                                      | Disclosure of funding source                                                                                              | 16                                        |

From: Stroup DF, Berlin JA, Morton SC, et al, for the Meta-analysis Of Observational Studies in Epidemiology (MOOSE) Group. Meta-analysis of Observational Studies in Epidemiology. A Proposal for Reporting. *JAMA*. 2000;283(15):2008-2012. doi: 10.1001/jama.283.15.2008.
