# Supplementary material for: Real-world persistence and adherence to oral antimuscarinics and mirabegron in patients with overactive bladder (OAB): a systematic literature review
Source: PubMed Central journal article supplement — BMJ Open. 2018 Nov 21;8(11):e021889. doi: 10.1136/bmjopen-2018-021889 (PMC6252764; doi:10.1136/bmjopen-2018-021889), 2018-11-21
Supplement: bmjopen-2018-021889supp001.pdf [file bmjopen-2018-021889supp001.pdf]

## Supplemental Information

### Literature Search Strategies

**The following databases were searched;**

- Allied and Complementary Database [AMED] (via OVID)
- Cumulative Index to Nursing and Allied Health Literature [CINAHL] (via EBSCOhost)
- MEDLINE (via EBSCOhost)
- Database of Reviews of Effects [DARE] (via CRD, University of York)
- Health Technology Assessment [HTA] (via CRD, University of York)
- Centre for Reviews and Dissemination [CRD] (via CRD, University of York)

The searches were conducted on the 24<sup>th</sup> April 2017

**The date span of the searches;**

- AMED – 1985 to April 2017
- CINAHL – 1937 to April 2017
- MEDLINE – 1946 to April 2017
- DARE / HTA / CRD – 1994 to April 2017

|   |                                                                                                                                                                                                                    |    |
|---|--------------------------------------------------------------------------------------------------------------------------------------------------------------------------------------------------------------------|----|
|   | <b>Searches (AMED)*</b>                                                                                                                                                                                            |    |
| 1 | persisten* OR adheren* OR complian* OR discont* OR tolera* OR utili* OR database [In Article Title]                                                                                                                | –  |
| 2 | Bladder" OR "Overactive Bladder" OR "OAB" OR urin* OR incontinen* [In Article Title]                                                                                                                               | –  |
| 3 | Oxybutynin OR Tolterodine OR Fesoterodine OR Trospium OR Darifenacin OR Solifenacin OR Propiverine OR Imidafenacin OR Mirabegron OR Flavoxate OR Hyoscyamin* OR Anticholinerg* OR Antimuscarin* [In Article Title] | –  |
| 4 | (#1 AND #2 OR #3)                                                                                                                                                                                                  | 18 |
|   | <b>Searches (CINAHL &amp; MEDLINE)*</b>                                                                                                                                                                            |    |
| 5 | persisten* OR adheren* OR complian* OR discont* OR tolera* OR utili* OR database [In Article Title]                                                                                                                | –  |
| 6 | Bladder" OR "Overactive Bladder" OR "OAB" OR urin* OR incontinen* [In Article Title]                                                                                                                               | –  |
| 7 | Oxybutynin OR Tolterodine OR Fesoterodine OR Trospium OR Darifenacin OR Solifenacin OR Propiverine OR Imidafenacin OR Mirabegron OR Flavoxate OR Hyoscyamin* OR Anticholinerg* OR Antimuscarin* [In Article Title] | –  |

|    |                                                                                                                                                                                                                             |              |
|----|-----------------------------------------------------------------------------------------------------------------------------------------------------------------------------------------------------------------------------|--------------|
| 8  | (#5 AND #6 OR #7)                                                                                                                                                                                                           | 3,855        |
|    | <b>Searches (DARE / HTA / CRD)*</b>                                                                                                                                                                                         |              |
| 9  | persisten* OR adheren* OR complian* OR discont* OR tolera* OR utili* OR<br>database [In Article Title]                                                                                                                      | –            |
| 10 | Bladder" OR "Overactive Bladder" OR "OAB" OR urin* OR incontinen* [In<br>Article Title]                                                                                                                                     | –            |
| 11 | Oxybutynin OR Tolterodine OR Fesoterodine OR Trospium OR Darifenacin OR<br>Solifenacin OR Propiverine OR Imidafenacin OR Mirabegron OR Flavoxate OR<br>Hyoscyamin* OR Anticholinerg* OR Antimuscarin*<br>[In Article Title] | –            |
| 12 | (#9 AND #10 OR #11)                                                                                                                                                                                                         | 24           |
| 13 | Total from #4, #8 and #12                                                                                                                                                                                                   | 3,897        |
| 14 | Remove duplicates from 13 using EndNoteWeb                                                                                                                                                                                  | <b>3,614</b> |

\* Boolean operators were used. No other limits or filters were applied to each database.
