# Supplementary material for: Real-world persistence and adherence to oral antimuscarinics and mirabegron in patients with overactive bladder (OAB): a systematic literature review
Source: PubMed Central journal article supplement — BMJ Open. 2018 Nov 21;8(11):e021889. doi: 10.1136/bmjopen-2018-021889 (PMC6252764; doi:10.1136/bmjopen-2018-021889), 2018-11-21
Supplement: bmjopen-2018-021889supp002.pdf [file bmjopen-2018-021889supp002.pdf]

**Supplemental Table 1:** Patient characteristics, interventions and definitions/variables of persistence, adherence and discontinuation reported in the studies.

| Author (year) and country (database)                                                                                      | Participants                                                                                                                  | Drug/intervention*                                                                                                                                                                                                                                                                                                                                                                                                       | Definition of persistence/adherence/discontinuation and independent variables on persistence                                                                                                                                                                        | Length of follow-up |
|---------------------------------------------------------------------------------------------------------------------------|-------------------------------------------------------------------------------------------------------------------------------|--------------------------------------------------------------------------------------------------------------------------------------------------------------------------------------------------------------------------------------------------------------------------------------------------------------------------------------------------------------------------------------------------------------------------|---------------------------------------------------------------------------------------------------------------------------------------------------------------------------------------------------------------------------------------------------------------------|---------------------|
| Brostrøm and Hallas (2009) <sup>1</sup><br>Odense University Pharmacoepidemiological Database (OPED); Denmark (1999–2006) | n=2477<br>Male: n=836 (33.8%)<br>Female: n=1641 (66.2%)<br>Mean age: 68.3 years <sup>a</sup>                                  | Any prescription of OAB medication:<br>flavoxate (n=21)<br>oxybutynin TD (n=48)<br>tolterodine (n=1478)<br>solifenacin (n=774)<br>trospium (n=271)<br>darifenacin (n=52)                                                                                                                                                                                                                                                 | Patients who continued taking a particular drug for up to 7 years with no more than 120-day gaps were regarded as experiencing single-treatment episodes<br><br>Variables: age, gender, prior use of OAB agents and use of anti-diabetic drugs                      | Up to 7 years       |
| Chancellor et al (2013) <sup>2</sup><br>IMS Lifelink Database, Connecticut; USA (2005–2008)                               | n=103 250<br>Male: n≈25 916 <sup>a</sup> (25.1%)<br>Female: n≈77 334 <sup>a</sup> (74.9%)<br>Mean (SD) age: 58.7 (15.7) years | First (new) prescription of OAB medication in adults ≥18 years:<br>tolterodine ER (n=43 881) <sup>a</sup><br>solifenacin (n=15 488) <sup>a</sup><br>oxybutynin (n=15 075) <sup>a</sup><br>darifenacin (n=10 532) <sup>a</sup><br>oxybutynin ER (n=10 325) <sup>a</sup><br>oxybutynin TD (n=2272) <sup>a</sup><br>tolterodine (n=2581) <sup>a</sup><br>trospium (n=2478) <sup>a</sup><br>trospium ER (n=413) <sup>a</sup> | To be considered a discontinuation, patients were required to have a gap of at least 45 days in therapy based on fill dates and days' supply<br><br>Adherence rate was defined as the proportion of patients filling more than one prescription with an MPR of ≥80% | 2 years             |
| Chapple et al (2017) <sup>3</sup><br>Clinical Practice Research Datalink (CPRD); UK (2013–2014)                           | n=21 996<br>Male: n=6513 (29.6%)<br>Female: n=15 483 (70.4%)<br>Mean (SD) age: 63.9 (16.3) years                              | First (new) prescription of OAB medication in adults ≥18 years:<br>mirabegron (n=1203)<br>darifenacin (n=126)<br>fesoterodine (n=1287)<br>flavoxate (n=144)<br>oxybutynin ER (n=1144)<br>oxybutynin IR (n=5779)<br>propiverine (n=95)<br>solifenacin (n=8191)<br>tolterodine ER (n=1561)<br>tolterodine IR (n=1523)<br>trospium chloride (n=943)                                                                         | Treatment was defined as discontinued if the maximum allowable gap duration was at least 1.5 times the intended duration of the most recent prescription<br><br>Adherence rate was defined as mean MPR at 12 months                                                 | 1 year              |

| Author (year) and country (database)                                                                             | Participants                                                                                                                               | Drug/intervention*                                                                                                                                                                                        | Definition of persistence/adherence/discontinuation and independent variables on persistence                                                                                                                                                                                                                                                                                                          | Length of follow-up |
|------------------------------------------------------------------------------------------------------------------|--------------------------------------------------------------------------------------------------------------------------------------------|-----------------------------------------------------------------------------------------------------------------------------------------------------------------------------------------------------------|-------------------------------------------------------------------------------------------------------------------------------------------------------------------------------------------------------------------------------------------------------------------------------------------------------------------------------------------------------------------------------------------------------|---------------------|
| D'Souza et al (2008) <sup>4</sup><br>Undisclosed medical claims database; USA (1999–2004)                        | n=1117<br>Male: n≈206 <sup>a</sup> (18.4%)<br>Female: n≈911 <sup>a</sup> (81.6%)<br>Mean (SD) age: 55.7 (14.5) years                       | First index of an OAB medication in adults ≥18 years:<br>oxybutynin ER (n=249)<br>oxybutynin IR (n=108)<br>tolterodine ER (n=454)<br>tolterodine IR (n=306)                                               | Persistence was measured as the proportion of patients continuing therapy for 12 months without discontinuing the index drug or switching to other OAB drugs<br><br>Adherence rate was measured as the proportion of patients with an MPR of ≥0.80<br><br>Variables: age, gender, drug formulations and OAB-associated comorbidities (eg, falls/fractures, skin infections, UTIs, anxiety/depression) | 1 year              |
| Desgagné et al (1999) <sup>5</sup><br>Régie de l'assurance maladie du Québec (RAMQ) database; Canada (1994–1997) | n=6690<br>Male: n=2534 (37.9%)<br>Female: n=4156 (62.1%)<br>Mean age: 77.3 years <sup>a</sup>                                              | Patients aged ≥65 years with at least one prescription claim (first index) of:<br>oxybutynin (n=5718)<br>flavoxate (n=972)                                                                                | Persistence evaluated by percentage of patients refilling their initial prescription                                                                                                                                                                                                                                                                                                                  | Up to 4 years       |
| Gomes et al (2012) <sup>6</sup><br>Canada (Ontario Drug Benefit database of prescriptions)                       | n=56 851 <sup>a</sup><br>Male: n≈18 496 (32.5%) <sup>a</sup><br>Female: n≈38 355 (67.5%) <sup>a</sup><br>Mean age: 77.7 years <sup>a</sup> | Patients aged >65 years with a first index (new) claim of:<br>oxybutynin IR (n=31 996)<br>tolterodine ER/IR (n=24 855)                                                                                    | Persistence with treatment was defined by refills for the index drug within an interval defined by the duration specified on the prescription plus a 50% grace period                                                                                                                                                                                                                                 | 2 years             |
| Gopal et al (2008) <sup>7</sup><br>UK (Health Improvement Network database of prescriptions) (1991–2005)         | n=29 369<br>Male: n=0 (0%)<br>Female: n=29 369 (100%)<br>Mean (SD) age: 63.9 (16.8) years                                                  | Women aged ≥18 years prescribed anti-cholinergic medications:<br>tolterodine IR<br>tolterodine ER<br>oxybutynin IR<br>oxybutynin ER<br>flavoxate<br>terodiline<br>trospium<br>propriverine<br>solifenacin | Discontinuation was defined by no anticholinergic prescriptions issued within 90 days after the end of the last anticholinergic drug prescription<br><br>Anticholinergic medications were considered discontinued at the time a patient switched to another medication or as above<br>Variables: drug formulation                                                                                     | 3 years             |

| Author (year) and country (database)                                                                        | Participants                                                                                                           | Drug/intervention*                                                                                                                                                                                                                                                              | Definition of persistence/adherence/discontinuation and independent variables on persistence                                                                                                                                                                                                                                                                                                                                                                                                                                                                                                                                                           | Length of follow-up |
|-------------------------------------------------------------------------------------------------------------|------------------------------------------------------------------------------------------------------------------------|---------------------------------------------------------------------------------------------------------------------------------------------------------------------------------------------------------------------------------------------------------------------------------|--------------------------------------------------------------------------------------------------------------------------------------------------------------------------------------------------------------------------------------------------------------------------------------------------------------------------------------------------------------------------------------------------------------------------------------------------------------------------------------------------------------------------------------------------------------------------------------------------------------------------------------------------------|---------------------|
| Ivanova et al (2014) <sup>8</sup><br>OptumHealth Reporting and Insights claims database; USA<br>(2007–2012) | n=10 318<br>Male: n=2822 (27.4%) <sup>a</sup><br>Female: n=7496 (72.6%) <sup>a</sup><br>Mean age: 51.6 years           | Patients aged 18 to 64 receiving a new prescription of:<br>darifenacin (n=970) <sup>a</sup><br>solifenacin (n=2662) <sup>a</sup><br>oxybutynin (n=2889) <sup>a</sup><br>tolterodine (n=3116) <sup>a</sup><br>trospium (n=454) <sup>a</sup><br>fesoterodine (n=227) <sup>a</sup> | Persisters were defined as patients who did not switch or discontinue the index antimuscarinic during the first 6 months after the treatment initiation date<br><br>Discontinuation was defined by a gap of at least 60 days between refills within the first 6 months after the treatment initiation date<br><br>Switching was defined as a changed prescription from the index antimuscarinic within the first 6 months after the treatment initiation date (with a gap of 60 days between the end of the day supply of the index antimuscarinic and the new antimuscarinic)<br><br>Variables: age, gender, history of UTIs and index antimuscarinic | 6 months            |
| Johnston et al (2012) <sup>9</sup><br>Truven Health MarketScan® Database; USA<br>(2004–2009)                | n=73 120<br>Male: n=29 406 (40.2%)<br>Female: n=43 714 (59.8%)<br>Mean age: 69.0 years <sup>a</sup>                    | First index drug in OAB patients with or without diabetes, aged ≥18 years:<br>darifenacin<br>oxybutynin<br>solifenacin<br>tolterodine<br>trospium                                                                                                                               | Persistence was measured as the number of days from the index date until a gap in OAB medication of ≥45 days<br><br>Adherence was assessed using the interval-based (fixed time-period) MPR (adherent patients had an ≥80% MPR)<br><br>Variables: age, gender and diabetes                                                                                                                                                                                                                                                                                                                                                                             | 1 year              |
| Kalder et al (2014) <sup>10</sup><br>Disease Analyzer database (IMS Health); Germany<br>(2005–2012)         | n=26 834<br>Male: n=9660 <sup>a</sup> (36%)<br>Female: n=17 174 <sup>a</sup> (64%)<br>Mean (SD) age: 69.4 (13.2) years | First index (new) prescription in patients aged ≥18 years:<br>darifenacin (n=1995)<br>fesoterodine (=811)<br>oxybutynin (n=3813)<br>propiverine (n=2714)<br>solifenacin (n=4844)<br>tolterodine (n=1814)<br>trospium (n=10 843)                                                 | Treatment discontinuation was defined as a period of 90 days without prescription of UI therapy but with at least one visit to the same doctor after 90 days<br><br>Variables: age, gender, comorbidity burden (including diabetes) and antimuscarinic side-effects                                                                                                                                                                                                                                                                                                                                                                                    | 3 years             |

| Author (year) and country (database)                                                                                                                  | Participants                                                                                                                                  | Drug/intervention*                                                                                                                                                                                                                   | Definition of persistence/adherence/discontinuation and independent variables on persistence                                                                                                                                                                                                                                                                                                                                                                                                                          | Length of follow-up |
|-------------------------------------------------------------------------------------------------------------------------------------------------------|-----------------------------------------------------------------------------------------------------------------------------------------------|--------------------------------------------------------------------------------------------------------------------------------------------------------------------------------------------------------------------------------------|-----------------------------------------------------------------------------------------------------------------------------------------------------------------------------------------------------------------------------------------------------------------------------------------------------------------------------------------------------------------------------------------------------------------------------------------------------------------------------------------------------------------------|---------------------|
| Kleinman et al (2014) <sup>11</sup><br>Human Capital Management Services [HCMS] Research Reference Database; USA (2001–2011)                          | n=2960<br>Male: n=878 (29.7%)<br>Female: n=2082 (70.3%)<br>Mean age: 46.6 years                                                               | First index of OAB medication in adults aged 18 to 64 years:<br>darifenacin<br>fesoterodine<br>oxybutynin<br>flavoxate <sup>b</sup><br>solifenacin<br>tolterodine<br>trospium<br>hyoscyamine <sup>b</sup><br>imipramine <sup>b</sup> | Persistence was measured as the number of days from index UA prescription until first $\geq 30$ -day gap in UA medication supply<br><br>Adherence was measured as the percentage of the annual post-index period with available medication                                                                                                                                                                                                                                                                            | 1 year              |
| Krhut et al (2014) <sup>12</sup><br>Dept. of Urology and Dept. of Gynaecology and Obstetrics, University Hospital Ostrava; Czech Republic (2009–2010) | n=377<br>Male: n=52 (13.8%)<br>Female: n=325 (86.2%)<br>Mean (SD) age: 60.3 (13.8) years                                                      | First (new) index of OAB medication within patients attending hospital as an outpatient:<br>trospium (n=189)<br>propiverine (n=41)<br>tolterodine ER (n=9)<br>solifenacin (n=48)<br>fesoterodine (n=90)                              | Persistence was assessed according to the patient records                                                                                                                                                                                                                                                                                                                                                                                                                                                             | 1 year              |
| Manack et al (2011) <sup>13</sup><br>Thomson Reuters MarketScan <sup>®</sup> Commercial and Medicare Supplemental Databases; USA (2002–2007)          | n=46 271 <sup>c</sup><br>Male: n=19 727 (42.6%)<br>Female: n=26 544 (57.4%)<br>Mean (SD) age: 62.5 (19.6) years                               | Patients with neurogenic bladder origin (such as spinal cord injury and multiple sclerosis) receiving an oral OAB medication                                                                                                         | Continuation was defined as $\geq 365$ days of OAB oral drug use beginning at the index date with $\leq 90$ days between the end of therapy and end of eligibility<br><br>Discontinuation was defined as $\geq 6$ months of no OAB oral drug use between the end of therapy and the end of eligibility                                                                                                                                                                                                                | 1 year              |
| Mauseth et al (2013) <sup>14</sup><br>The Norwegian Prescription Database; Norway (2004–2010)                                                         | n=32 178<br>Male: n=0 (0.0%)<br>Female: n=32 178 (100.0%)<br>No mean age reported. The majority of patients (60.5%) were aged $\geq 60$ years | Adult patients aged $\geq 18$ years with a first index (new) prescription of:<br>tolterodine (n=12 389)<br>solifenacin (n=13 682)<br>darifenacin (n=4399)<br>fesoterodine (n=1708)                                                   | Persistence defined as the population who had not discontinued the drug during a period of 365 days after the index date<br><br>A switch was defined as a prescription for another of the drugs included in the study within 365 days after the index date<br><br>Adherence was measured using MPR (sum of days of supply for all tablets purchased, except those received at the last fill, divided by the total number of days from the first to the last filling)<br><br>Variables: age and initial antimuscarinic | 1 year              |

| Author (year) and country (database)                                                               | Participants                                                                                               | Drug/intervention*                                                                                                                                        | Definition of persistence/adherence/discontinuation and independent variables on persistence                                                                                                                                                                                                                                                                                         | Length of follow-up |
|----------------------------------------------------------------------------------------------------|------------------------------------------------------------------------------------------------------------|-----------------------------------------------------------------------------------------------------------------------------------------------------------|--------------------------------------------------------------------------------------------------------------------------------------------------------------------------------------------------------------------------------------------------------------------------------------------------------------------------------------------------------------------------------------|---------------------|
| Nitti et al (2016) <sup>15</sup><br>Optum Database; USA<br>(2010–2013)                             | n=2628<br>Male: n=602 (22.9%)<br>Female: n=2026 (77.1%)<br>Mean age: 57.3 years <sup>a</sup>               | New and existing users aged ≥18 years treated with:<br>mirabegron (n=380)<br>tolterodine ER (n=2248)                                                      | Persistence was defined as a continuous supply of index drug until any 30-day period during which the patient did not have a supply of index drug<br><br>Adherence: the proportion of days covered by the prescription was calculated using prescription fill dates and number of days' supply for each fill of a prescription                                                       | 6 months            |
| Pelletier et al (2009) <sup>16</sup><br>PharMetrics Patient-Centric Database; USA<br>(2005–2006)   | n=43 367<br>Male: n=9675 (22.3%)<br>Female: n=33 692 (77.7%)<br>Mean (SD) age: 51.1 (12.4) years           | Adults aged ≥18 years receiving a first index (new) prescription of:<br>tolterodine ER<br>oxybutynin<br>solifenacin<br>darifenacin<br>trospium            | Adherence was measured by PDC over the 12-month post index period (adherent patients had an ≥80% PDC)<br><br>Variables: age, gender and comorbidity burden (including COPD, congestive heart failure, diabetes, hypertension)                                                                                                                                                        | 1 year              |
| Perfetto et al (2005) <sup>17</sup><br>PharMetrics Patient-Centric Database; USA<br>(2001–2003)    | n=23 328<br>No patient demographics were reported                                                          | All patients with either a new diagnosis of OAB or new use of:<br>tolterodine ER<br>oxybutynin ER                                                         | Discontinuation rates were calculated                                                                                                                                                                                                                                                                                                                                                | 11 months           |
| Sears et al (2010) <sup>18</sup><br>Military Health System; USA<br>(2003–2006)                     | n=7858<br>Male: n=2357 (30.0%)<br>Female: n=5501 (70.0%)<br>Age was not reported                           | Military treatment facility enrollees prescribed:<br>oxybutynin ER (n=136)<br>oxybutynin IR (n=2003)<br>tolterodine ER (n=4716)<br>tolterodine IR (n=992) | Non-persistence was defined as patients who never refilled a prescription for any OAB medication during the 3-year study period<br><br>Medication switch rate was calculated as the proportion of patients who changed medication or dose at least once<br><br>Adherence was defined as the proportion of patients with an MPR of ≥80%<br><br>Variables: gender and drug formulation | 3 years             |
| Sicras-Mainar et al (2016) <sup>d,19</sup><br>Primary care medical databases; Spain<br>(2008–2013) | n=3094<br>Male: n≈1170 <sup>a</sup> (37.8%)<br>Female: n≈1924 <sup>a</sup> (62.2%)<br>Mean age: 54.0 years | Adults aged 20 to 64 with a first index (new) prescription of:<br>fesoterodine (n=859)<br>solifenacin (n=1330)<br>tolterodine (n=905)                     | Discontinuation was defined as when the patient switched to another active substance, another drug was added (combination) or the medication was discontinued completely or discontinued for ≥60 days without renewal and ≥2 prescriptions<br><br>Compliance was calculated using MPR<br><br>Variables: concomitant medication (antidepressants, antibiotics) and index drug         | 1 year              |

| Author (year) and country (database)                                                                                   | Participants                                                                                                                                                         | Drug/intervention*                                                                                                                     | Definition of persistence/adherence/discontinuation and independent variables on persistence                                                                                                                                                                                                                                                                                                                                                                               | Length of follow-up |
|------------------------------------------------------------------------------------------------------------------------|----------------------------------------------------------------------------------------------------------------------------------------------------------------------|----------------------------------------------------------------------------------------------------------------------------------------|----------------------------------------------------------------------------------------------------------------------------------------------------------------------------------------------------------------------------------------------------------------------------------------------------------------------------------------------------------------------------------------------------------------------------------------------------------------------------|---------------------|
| Sicras-Mainar et al (2015) <sup>d,20</sup><br>Primary care medical databases; Spain (2008–2013)                        | n=3094<br>Male: n≈1170 <sup>a</sup> (37.8%)<br>Female: n≈1924 <sup>a</sup> (62.2%)<br>Mean (SD) age: 54.0 (9.2) years                                                | Adults aged ≥20 years with a first index (new) prescription of:<br>fesoterodine (n=859)<br>solifenacin (n=1330)<br>tolterodine (n=905) | Persistence was defined as the time, measured in months, without stopping the initial treatment or switching to another medication at least 30 days after the initial prescription<br><br>Compliance was defined according to ISPOR criteria and was calculated based on the MPR, which was evaluated from the first to the last prescription and represented the number of days of medication taken over the number of days in treatment (commencing from the start date) | 1 year              |
| Sicras-Mainar et al (2014a) <sup>21</sup><br>Primary care medical databases; Spain (2008–2010)                         | n=552<br>Male: n≈272 <sup>a</sup> (49.2%)<br>Female: n≈280 <sup>a</sup> (50.8%)<br>Mean (SD) age: 80.2 (4.0) years                                                   | Adults aged ≥75 years with a first index (new) prescription of:<br>fesoterodine (n=58)<br>solifenacin (n=252)<br>tolterodine (n=212)   | Persistence was defined as the time, in weeks, with no drop-out from initial treatment or with no switch to another medication at least 30 days following initial prescription<br><br>Compliance was defined according to ISPOR criteria and was calculated based on the medication use/possession rate                                                                                                                                                                    | 1 year              |
| Sicras-Mainar et al (2014b) <sup>e,22</sup><br>Primary care medical databases; Spain (2008–2010)                       | n=1971<br>Male: n=821 (41.7%)<br>Female: n=1150 (58.3%)<br>Mean (SD) age: 70.1 (10.6) years                                                                          | Adults aged ≥18 years with a first index (new) prescription of:<br>fesoterodine (n=302)<br>solifenacin (n=952)<br>tolterodine (n=717)  | Discontinuation was defined by either the absence of prescription coverage for the initial therapy for the remainder of the 52-week follow-up period or a switch to an alternative antimuscarinic during this time-period<br><br>Variables: index drug                                                                                                                                                                                                                     | 1 year              |
| Sicras-Mainar et al (2013) <sup>e,23</sup><br>Primary care medical databases; Spain (2008–2010)                        | n=1971<br>Male: n=821 (41.7%)<br>Female: n=1150 (58.3%)<br>Mean (SD) age: 70.1 (10.6) years                                                                          | Adults aged ≥18 years with a first index (new) prescription of:<br>fesoterodine (n=302)<br>solifenacin (n=952)<br>tolterodine (n=717)  | Persistence was defined as patients who remained on treatment during the 52-week period following the index date<br><br>Compliance was defined according to ISPOR criteria and was calculated based on the MPR                                                                                                                                                                                                                                                             | 1 year              |
| Suehs et al (2016) <sup>24</sup><br>Medicare Advantage Prescription Plan - Administrative Claims Data; USA (2007–2013) | n=46 140 <sup>a</sup><br>Male: n=15 479 <sup>a</sup> (33.5%) <sup>a</sup><br>Female: n=30 661 <sup>a</sup> (66.5%) <sup>a</sup><br>Mean age: 75.5 years <sup>a</sup> | Adults aged 65 to 89 years <sup>f</sup> with a first index (new) prescription of any antimuscarinic OAB medication                     | Persistence was assessed as time in days from the index date to discontinuation of index antimuscarinic treatment<br><br>Adherence was assessed as PDC with the index OAB treatment over three predefined post index observation periods: 3, 6, and 12 months<br><br>Treatment discontinuation was identified using a permissible gap between refills of 15 days                                                                                                           | 1 year              |

| Author (year) and country (database)                                                                                           | Participants                                                                                                                                                                       | Drug/intervention*                                                                                                                                                                                                     | Definition of persistence/adherence/discontinuation and independent variables on persistence                                                                                                                                                                                                                                                                                                                                                         | Length of follow-up |
|--------------------------------------------------------------------------------------------------------------------------------|------------------------------------------------------------------------------------------------------------------------------------------------------------------------------------|------------------------------------------------------------------------------------------------------------------------------------------------------------------------------------------------------------------------|------------------------------------------------------------------------------------------------------------------------------------------------------------------------------------------------------------------------------------------------------------------------------------------------------------------------------------------------------------------------------------------------------------------------------------------------------|---------------------|
| Sussman et al (2017) <sup>25</sup><br>Truven MarketScan®<br>Claims Database; USA<br>(2012–2013)                                | n=71 980 <sup>a</sup><br>Male: n=21 225 <sup>a</sup> (29.5%) <sup>a</sup><br>Female: n=50 755 <sup>a</sup> (70.5%) <sup>a</sup><br>Mean age: 62.3 years <sup>a</sup>               | Adults aged ≥18 years with a prescription of:<br>mirabegron<br>any anticholinergic OAB medication                                                                                                                      | Persistence was measured by evaluating treatment failure (defined as either treatment discontinuation or treatment switching). A medication supply gap of ≥30 days was used to define treatment discontinuation<br><br>Adherence was defined as the PDC (ie, the number of days covered by the index therapy divided by the number of days between the index date and the end of the follow-up [365 days]). A PDC of <80% was considered nonadherent | 1 year              |
| Wagg et al (2012) <sup>26</sup><br>Prescription Database;<br>UK (2007–2008)                                                    | n=4833<br>Demographics were not explicitly reported, the majority of prescriptions appeared to be issued to patients aged ≥60 years                                                | Adults aged ≥40 years with a first index (new) prescription of:<br>darifenacin<br>flavoxate<br>oxybutynin ER<br>oxybutynin IR<br>propiverine<br>solifenacin<br>tolterodine ER<br>tolterodine IR<br>trospium            | Persistence was defined as the mean time [in days] until discontinuation (a gap in treatment exceeding 1.5 times than the length of the previous prescription without a refill)                                                                                                                                                                                                                                                                      | 1 year              |
| Wagg et al (2015) <sup>27</sup><br>Canadian National<br>Private Drug Plan<br>Database; Canada<br>(2013)                        | n=19 485<br>Male: n=4992 (25.6%) <sup>a</sup><br>Female: n=14 493 (74.3%) <sup>a</sup><br>Mean age not reported; the majority of patients (77.8%) <sup>a</sup> were aged ≥46 years | Adults aged ≥18 years with a first index (new) prescription of:<br>mirabegron (n=1683)<br>fesoterodine (n=1415)<br>oxybutynin ER (n=1260)<br>oxybutynin IR (n=5356)<br>solifenacin (n=6032)<br>tolterodine ER (n=3739) | Adherence was defined by the MPR over 1 year<br><br>To calculate time to end of persistence (defined by a gap in therapy of ≥30 days or switching to another medication), prescription claims for a target drug were tracked for 12 months after the index claim date<br><br>Variables: age, gender, treatment-naïve vs treatment-experienced, index antimuscarinic, number of coexisting medications                                                | 1 year              |
| Wagg et al (2015) <sup>28</sup><br>IMS Brogan public and<br>private prescription<br>claims databases;<br>Canada<br>(2007–2012) | n=31 707<br>Male: n=9395 (29.6%) <sup>a</sup><br>Female: n=22 312 (70.4%) <sup>a</sup><br>Mean age not reported                                                                    | Adult patients receiving a first index (new) prescription of:<br>oxybutynin IR<br>oxybutynin ER<br>tolterodine IR<br>tolterodine ER<br>solifenacin<br>darifenacin<br>trospium<br>flavoxate                             | Discontinuation was defined as patients experiencing a gap in therapy longer than 60 days                                                                                                                                                                                                                                                                                                                                                            | 4 years             |

| Author (year) and country (database)                                                                  | Participants                                                                                  | Drug/intervention*                                                                                                                                                                  | Definition of persistence/adherence/discontinuation and independent variables on persistence                                                                                                                                                                                                                                                                                                                                                                                                                                                                                                                                                                                                    | Length of follow-up |
|-------------------------------------------------------------------------------------------------------|-----------------------------------------------------------------------------------------------|-------------------------------------------------------------------------------------------------------------------------------------------------------------------------------------|-------------------------------------------------------------------------------------------------------------------------------------------------------------------------------------------------------------------------------------------------------------------------------------------------------------------------------------------------------------------------------------------------------------------------------------------------------------------------------------------------------------------------------------------------------------------------------------------------------------------------------------------------------------------------------------------------|---------------------|
| Yeaw et al (2009) <sup>29</sup><br>PharMetrics Patient-Centric Database (pharmacy claims); USA (2005) | n=7722<br>Male: n=1686 (21.8%)<br>Female: n=6036 (78.2%)<br>Mean (SD) age: 43.7 (18.3) years  | Adult patients receiving a first index (new) prescription of:<br>tolterodine<br>oxybutynin<br>solifenacin<br>darifenacin<br>trospium<br>bethanechol<br>flavoxate<br>hyoscyamine     | Persistence was calculated for the post-index period until the patient discontinued therapy, was lost to follow-up due to disenrollment from the health plan (minimum of 12 months), or the maximum 24-month follow-up period ended, whichever event occurred first. A patient was considered persistent until an excessive gap in days supplied occurred; refill gaps of 30, 60, and 90 days were used to calculate persistence for all cohorts<br><br>Adherence was measured using the PDC for each of the six drug class cohorts. This was calculated by taking patients' total days supplied of index class medications for the 360-day period following the index date and dividing by 360 | 2 years             |
| Yu et al (2015) <sup>30</sup><br>California Medi-Cal administrative files; USA (1999–2002)            | n=2496<br>Male: n=534 (21.4%)<br>Female: n=1962 (78.6%)<br>Mean (SD) age: 63.15 (16.14) years | Adult patients aged ≥18 years receiving a prescription of an OAB drug, including:<br>tolterodine (n=1093)<br>oxybutynin ER (n=524)<br>oxybutynin (n=812)<br>other OAB agents (n=67) | Persistence was measured by the length of continuous pharmacological treatment (patients discontinued their treatment if they failed to refill OAB/UI agents within 30 days after the expected end date of the previous prescription)<br><br>Patients who switched from one agent of OAB/UI drug to another within 30 days were considered persistent on therapy.<br><br>Adherence was defined as MPR over 181 days for the 6-month follow-up period<br><br>Variables: age, gender, ethnicity, index drug, OAB-associated comorbidities (UTIs), medication use history, length of hospital stay and number of drug classes prescribed                                                           | 1 year              |

COPD = chronic obstructive pulmonary disease; ER = extended release; ISPOR = International Society for Pharmacoeconomics and Outcomes Research; IR = immediate release; MPR = medication possession ratio (measured as the proportion of days with any OAB medication on hand, over the length of the evaluation period); OAB = overactive bladder; PDC = proportion of days covered; PIM = potentially inappropriate medication; SD = standard deviation; TD = transdermal; UA = urinary antispasmodic; UI = urinary incontinence; UTIs = urinary tract infections

\*The sum of the patients prescribed individual drugs may not match the total number of patients perhaps due to switching in some studies

<sup>a</sup>Calculated from data presented in the article; <sup>b</sup>used only in an OAB context; <sup>c</sup>26 922 continued, discontinued or restarted an OAB medication in the study period, but no demographics for this specific sub-group are reported; <sup>d</sup>Sicras-Mainar et al (2016)<sup>19</sup> and Sicras-Mainar et al (2015)<sup>20</sup> relate to the same patient group in terms of demographics and the timeframe/geographical source of adherence/persistence data; <sup>e</sup>Sicras-Mainar et al (2014)<sup>22</sup> and Sicras-Mainar et al (2013)<sup>23</sup> relate to the same patient group in terms of demographics and the timeframe/geographical source of adherence/persistence data; <sup>f</sup>this cohort was split into two groups – patients who were assigned OAB medication appropriately [non-PIM], or potentially inappropriately [PIM]. Inappropriateness was defined as patients having “drug–disease or syndrome interaction or indication of significant anticholinergic medication burden at the time of initiation of an antimuscarinic OAB treatment”



## References

1. Brostrom S, Hallas J: Persistence of antimuscarinic drug use. *Eur J Clin Pharmacol* 2009; **65**: 309.
2. Chancellor MB, Yehoshua A, Waweru C et al: Limitations of anticholinergic cycling in patients with overactive bladder (OAB) with urinary incontinence (UI): results from the CONsequences of Treatment Refractory Overactive bLadder (CONTROL) study. *Int Urol Nephrol* 2016; **48**: 1029.
3. Chapple CR, Nazir J, Hakimi Z et al: Persistence and adherence with mirabegron versus antimuscarinic agents in patients with overactive bladder: a retrospective observational study in UK clinical practice. *Eur Urol* 2017; **72**: 389.
4. D'Souza AO, Smith MJ, Miller LA et al: Persistence, adherence, and switch rates among extended-release and immediate-release overactive bladder medications in a regional managed care plan. *J Manag Care Pharm* 2008; **14**: 291.
5. Desgagne A, LeLorier J: Incontinence drug utilization patterns in Quebec, Canada. *Value Health* 1999; **2**: 452.
6. Gomes T, Juurlink DN, Mamdani MM: Comparative adherence to oxybutynin or tolterodine among older patients. *Eur J Clin Pharmacol* 2012; **68**: 97.
7. Gopal M, Haynes K, Bellamy SL et al: Discontinuation rates of anticholinergic medications used for the treatment of lower urinary tract symptoms. *Obstet Gynecol* 2008; **112**: 1311.
8. Ivanova JI, Hayes-Larson E, Sorg RA et al: Healthcare resource use and costs of privately insured patients who switch, discontinue, or persist on anti-muscarinic therapy for overactive bladder. *J Med Econ* 2014; **17**: 741.
9. Johnston S, Janning SW, Haas GP et al: Comparative persistence and adherence to overactive bladder medications in patients with and without diabetes. *Int J Clin Pract* 2012; **66**: 1042.
10. Kalder M, Pantazis K, Dinas K et al: Discontinuation of treatment using anticholinergic medications in patients with urinary incontinence. *Obstet Gynecol* 2014; **124**: 794.
11. Kleinman NL, Odell K, Chen CI et al: Persistence and adherence with urinary antispasmodic medications among employees and the impact of adherence on costs and absenteeism. *J Manag Care Spec Pharm* 2014; **20**: 1047.
12. Krhut J, Gartner M, Petzel M et al: Persistence with first line anticholinergic medication in treatment-naive overactive bladder patients. *Scand J Urol* 2014; **48**: 79.
13. Manack A, Motsko SP, Haag-Molkenteller C et al: Epidemiology and healthcare utilization of neurogenic bladder patients in a US claims database. *Neurourol Urodyn* 2011; **30**: 395.
14. Mauseth SA, Skurtveit S, Spigset O: Adherence, persistence and switch rates for anticholinergic drugs used for overactive bladder in women: data from the Norwegian Prescription Database. *Acta Obstet Gynecol Scand* 2013; **92**: 1208.
15. Nitti VM, Rovner ES, Franks B et al: Persistence with mirabegron versus tolterodine in patients with overactive bladder. *Am J Pharm Benefits* 2016; **8**: e25.
16. Pelletier EM, Vats V, Clemens JQ: Pharmacotherapy adherence and costs versus nonpharmacologic management in overactive bladder. *Am J Manag Care* 2009; **15**: S108.
17. Perfetto EM, Subedi P, Jumadilova Z: Treatment of overactive bladder: a model comparing extended-release formulations of tolterodine and oxybutynin. *Am J Manag Care* 2005; **11**: S150.
18. Sears CL, Lewis C, Noel K et al: Overactive bladder medication adherence when medication is free to patients. *J Urol* 2010; **183**: 1077.

19. Sicras-Mainar A, Navarro-Artieda R, Ruiz-Torrejon A et al: Persistence and concomitant medication in patients with overactive bladder treated with antimuscarinic agents in primary care. An observational baseline study. *Actas Urol Esp* 2016; **40**: 96.
20. Sicras-Mainar A, Navarro-Artieda R, Ruiz-Torrejon A et al: Impact of loss of work productivity in patients with overactive bladder treated with antimuscarinics in Spain: study in routine clinical practice conditions. *Clin Drug Investig* 2015; **35**: 795.
21. Sicras-Mainar A, Rejas-Gutierrez J, Navarro-Artieda R et al: Use of health care resources and associated costs in non-institutionalized vulnerable elders with overactive bladder treated with antimuscarinic agents in the usual medical practice. *Actas Urol Esp* 2014; **38**: 530.
22. Sicras-Mainar A, Rejas J, Navarro-Artieda R et al: Antimuscarinic persistence patterns in newly treated patients with overactive bladder: a retrospective comparative analysis. *Int Urogynecol J* 2014; **25**: 485.
23. Sicras-Mainar A, Rejas J, Navarro-Artieda R et al: Health economics perspective of fesoterodine, tolterodine or solifenacin as first-time therapy for overactive bladder syndrome in the primary care setting in Spain. *BMC Urol* 2013; **13**: 51.
24. Suehs BT, Davis C, Franks B et al: Effect of potentially inappropriate use of antimuscarinic medications on healthcare use and cost in individuals with overactive bladder. *J Am Geriatr Soc* 2016; **64**: 779.
25. Sussman D, Yehoshua A, Kowalski J et al: Adherence and persistence of mirabegron and anticholinergic therapies in patients with overactive bladder: a real-world claims data analysis. *Int J Clin Pract* 2017; **71**: e12824.
26. Wagg A, Compion G, Fahey A et al: Persistence with prescribed antimuscarinic therapy for overactive bladder: a UK experience. *BJU Int* 2012; **110**: 1767.
27. Wagg A, Franks B, Ramos B et al: Persistence and adherence with the new beta-3 receptor agonist, mirabegron, versus antimuscarinics in overactive bladder: early experience in Canada. *Can Urol Assoc J* 2015; **9**: 343.
28. Wagg A, Diles D, Berner T: Treatment patterns for patients on overactive bladder therapy: a retrospective statistical analysis using Canadian claims data. *JHEOR* 2015; **3**: 43.
29. Yeaw J, Benner JS, Walt JG et al: Comparing adherence and persistence across 6 chronic medication classes. *J Manag Care Pharm* 2009; **15**: 728.
30. Yu YF, Nichol MB, Yu AP et al: Persistence and adherence of medications for chronic overactive bladder/urinary incontinence in the California Medicaid program. *Value Health* 2005; **8**: 495.
